# Supplementary material for: Conformation of the nuclear pore in living cells is modulated by transport state
Source: eLife. 2020 Dec 21;9:e60654. doi: 10.7554/eLife.60654 (PMC7752133; doi:10.7554/eLife.60654)
Supplement: Figure 1—figure supplement 1—source data 1. [file elife-60654-fig1-figsupp1-data1.xlsx]

## Sheet: Figure1_S1
Construct	Nup133(-9b)	Nup93(-6)	Nup54_494(-4)	Nup58(-7)
Median	1.38423	1.23767	0.895744	1.02893
First Quartile	1.3187	1.19341	0.835172	0.979434
Third Quartile	1.44565	1.27854	0.945735	1.09903
numNPCs	390	322	384	294
	1.23223	1.20467	0.984694	1.06609
	1.36514	1.20614	0.862069	0.987315
	1.26575	1.25031	0.941345	0.932811
	1.42064	1.163	0.813472	0.939039
	1.39644	1.20401	0.842265	1.12769
	1.30986	1.16624	0.711625	1.06873
	1.30261	1.20463	0.89196	0.9809
	1.45955	1.20924	0.817486	0.90625
	1.36622	1.27041	0.887202	1.02291
	1.42256	1.25779	0.901961	1.04286
	1.32304	1.26436	0.836709	1.21717
	1.27668	1.17933	1.0826	0.945833
	1.45359	1.26519	0.929922	1.11064
	1.26923	1.18363	0.940435	0.877381
	1.27921	1.23631	0.805534	1.07641
	1.47076	1.22296	0.901408	0.925519
	1.3244	1.13907	0.878481	0.978289
	1.36175	1.20565	0.985455	0.997429
	1.32621	1.27584	0.843788	1.12629
	1.5591	1.29242	0.980952	1.21502
	1.36246	1.14432	1.07424	1.01703
	1.3142	1.20366	1.04155	0.919455
	1.33543	1.07105	0.929193	1.02022
	1.29091	1.14815	0.976608	0.858779
	1.37298	1.25204	0.97593	1.18616
	1.34106	1.25678	0.831694	1.08728
	1.25352	1.26847	0.949698	1.02416
	1.37876	1.21619	0.904459	0.965995
	1.35895	1.20926	0.942308	1.1913
	1.37364	1.19274	0.917607	0.960526
	1.30837	1.22032	0.878351	0.93537
	1.37404	1.22049	0.955322	1.05204
	1.22588	1.32508	0.929397	1.09815
	1.29961	1.23492	0.981651	0.996094
	1.41354	1.12308	0.90011	0.903497
	1.43756	1.15231	0.917235	0.997283
	1.46852	1.17153	0.957241	0.895442
	1.31418	1.27527	0.908764	1.08527
	1.44722	1.23463	0.861868	0.955224
	1.16	1.15859	0.968788	1.12463
	1.46082	1.14684	0.838503	1.07917
	1.29463	1.14563	0.842105	1.02405
	1.41348	1.24715	0.881865	1.05882
	1.41045	1.23758	0.933187	1.0394
	1.29247	1.21763	1.17778	1.14787
	1.43168	1.14554	0.927024	1.09909
	1.44101	1.21901	0.897855	0.97428
	1.32971	1.33151	0.829196	0.978142
	1.31088	1.2287	0.843886	1.0094
	1.31846	1.2826	0.836134	0.981413
	1.51814	1.20983	0.907097	0.895698
	1.25352	1.28051	0.757788	0.979751
	1.26453	1.2629	0.871204	0.991272
	1.3654	1.1448	0.868217	1.02868
	1.38928	1.2303	1.02116	0.9234
	1.34221	1.12992	0.866505	0.945833
	1.44615	1.20427	0.945982	1.03438
	1.34277	1.2096	0.861171	1.15639
	1.4244	1.2487	0.83242	1.08087
	1.46331	1.25111	0.929175	1.00126
	1.48239	1.162	0.94321	1.01437
	1.43868	1.33467	0.852217	0.973538
	1.36651	1.27911	0.926158	0.972936
	1.37896	1.1533	0.880925	0.976054
	1.32602	1.33011	0.981818	0.858394
	1.35741	1.22823	0.897657	1.04966
	1.31517	1.22116	0.900356	1.06725
	1.4565	1.26106	0.821429	1.01774
	1.27649	1.2417	0.771285	0.990691
	1.51831	1.28895	0.910062	1.06531
	1.34807	1.2231	0.977273	1.01003
	1.48156	1.16476	0.872506	0.895028
	1.3411	1.21671	0.838954	1.04769
	1.41244	1.27252	0.987179	1.11725
	1.4501	1.19941	1.07534	1.11298
	1.57331	1.19421	0.872454	1.03618
	1.43814	1.31478	0.907254	1.15936
	1.25094	1.22401	0.951531	1.10402
	1.32502	1.27107	0.932611	0.975028
	1.43251	1.20942	0.791075	0.998319
	1.42581	1.16667	0.932416	1.2372
	1.25943	1.30681	0.929032	1.03193
	1.45552	1.20325	0.832737	0.977716
	1.41295	1.23815	0.820166	0.974576
	1.46869	1.23433	0.881414	0.95258
	1.22385	1.26531	0.897492	1.03946
	1.44414	1.1661	0.965854	0.908681
	1.46205	1.324	0.795593	1.1661
	1.51532	1.27669	1.04706	1.08745
	1.22199	1.26056	0.852094	1.12519
	1.49032	1.17379	1.02703	1.09323
	1.43605	1.22108	1.00611	1.1866
	1.22137	1.14164	0.786212	1.0994
	1.57614	1.1348	0.91635	0.863158
	1.46207	1.18938	0.896057	1.14466
	1.33726	1.27686	0.788698	1.1763
	1.35817	1.2123	0.853821	1.10565
	1.36895	1.25841	0.89433	1.05307
	1.3774	1.0853	0.857807	1.01674
	1.34607	1.14694	0.872812	1.02778
	1.15852	1.27672	0.896437	0.988113
	1.42282	1.25687	0.967742	1.07569
	1.39014	1.29305	1.08246	1.1003
	1.42369	1.29976	0.925926	0.866044
	1.41802	1.11459	0.769097	1.17538
	1.34792	1.18387	0.791594	1.04271
	1.35437	1.18858	1.19773	1.02918
	1.3313	1.28419	0.932598	1.11276
	1.3393	1.25538	0.913989	1.12732
	1.40845	1.26994	0.848245	0.912333
	1.44962	1.16261	0.971831	1.11292
	1.56126	1.26437	0.900356	0.924658
	1.4186	1.25161	0.988372	1.08838
	1.24816	1.20334	0.992063	0.98941
	1.42641	1.19396	0.878261	1.07402
	1.32356	1.0856	0.884567	0.984395
	1.41796	1.26707	0.89902	1.07386
	1.33438	1.21769	0.918641	1.03081
	1.38924	1.20216	0.899485	1.02689
	1.39238	1.21963	1.1034	0.984093
	1.56126	1.33623	0.818092	1.05891
	1.43872	1.27869	1.14987	1.0126
	1.37561	1.20974	0.960829	1.13922
	1.42884	1.22981	0.985203	0.97181
	1.48501	1.28598	0.871446	0.987421
	1.38938	1.23945	0.966292	1.16241
	1.42945	1.26819	0.997015	1.08449
	1.36374	1.28092	0.784519	0.959091
	1.39581	1.22885	0.754537	1.02388
	1.45951	1.23841	0.796185	1.08383
	1.38137	1.08786	0.775726	1.0018
	1.3588	1.21568	0.847147	0.900813
	1.23449	1.24205	0.962963	1.00404
	1.41513	1.41717	0.924242	1.05331
	1.30217	1.27444	1.04424	1.11334
	1.54607	1.27754	0.835175	1.0789
	1.34778	1.19378	0.863041	0.877419
	1.40814	1.27143	0.833175	1.01726
	1.45796	1.29528	0.869752	1.02228
	1.3692	1.15913	0.864594	1.03292
	1.37046	1.25059	0.755133	1.04738
	1.40044	1.22054	0.950139	0.979661
	1.3763	1.17647	0.856984	1.09885
	1.34798	1.30368	0.885584	1.01732
	1.54324	1.23667	0.920497	1.01818
	1.19977	1.2073	0.909487	1.00289
	1.20884	1.2809	0.820814	0.932602
	1.49938	1.19508	0.907168	1.02778
	1.25764	1.22482	0.816759	1.04762
	1.37086	1.17327	0.888591	1.08113
	1.47713	1.3406	0.805882	0.91778
	1.29223	1.29891	0.8875	1.05541
	1.47937	1.2506	0.905728	0.924609
	1.34227	1.27855	0.963399	1.08595
	1.36538	1.24378	0.96412	1.01223
	1.70399	1.16281	1.00811	1.15321
	1.43304	1.22537	0.896296	0.932967
	1.54181	1.19042	0.91446	1.12769
	1.38768	1.15179	0.755672	1.00801
	1.43246	1.29427	0.863281	0.945425
	1.2088	1.29455	0.972549	0.884657
	1.4328	1.32945	0.825312	0.969059
	1.42054	1.32913	0.9163	1.11654
	1.20485	1.29198	0.852797	1.04515
	1.39842	1.12507	0.945539	1.18063
	1.31486	1.28306	0.938974	0.983448
	1.45271	1.19695	0.8867	1.08274
	1.42388	1.28668	1.02203	1.05263
	1.54289	1.18849	0.757962	0.969027
	1.45391	1.24756	0.897837	1.09736
	1.43378	1.23777	0.778073	1.19185
	1.42677	1.24244	0.81459	1.15294
	1.31444	1.19329	0.783123	1.01342
	1.43922	1.27774	0.83445	1.05583
	1.30118	1.29334	0.706531	0.98546
	1.41125	1.27652	0.858169	1.1073
	1.36022	1.23322	0.754272	1.18216
	1.40353	1.28275	0.880034	1.04255
	1.45226	1.1955	0.834897	1.05847
	1.3789	1.20279	0.813187	0.85078
	1.41729	1.31199	0.922865	1.03793
	1.37386	1.19405	0.818884	1.05158
	1.55139	1.30496	0.941535	1.12116
	1.35737	1.29014	0.925769	0.956885
	1.53874	1.21109	0.816931	1.12579
	1.32616	1.23386	0.753134	1.00702
	1.50556	1.29132	0.879365	1.12831
	1.20723	1.26011	0.967405	1.00192
	1.3078	1.25378	1.01448	1.21866
	1.62172	1.24939	0.914938	0.988142
	1.44832	1.22104	0.918527	1.19393
	1.38545	1.18466	0.959583	1.01955
	1.45358	1.24515	0.917902	1.19283
	1.30838	1.26471	0.838604	1.11182
	1.40909	1.38385	0.978873	0.986254
	1.49654	1.18333	0.895431	1.07215
	1.41509	1.22425	0.810311	1.3
	1.37068	1.29032	0.796846	1.09184
	1.553	1.29056	0.925887	1.11147
	1.46392	1.31855	0.94314	1.25898
	1.39718	1.25996	0.773759	1.01677
	1.60243	1.25122	0.914754	1.02862
	1.34125	1.2603	0.951768	1.14044
	1.29795	1.27956	0.924716	1.19494
	1.3887	1.29169	0.900246	1.07554
	1.40949	1.29954	0.861171	1.17966
	1.28853	1.30483	0.924574	1.02731
	1.40936	1.26919	0.789675	1.13652
	1.38538	1.21279	0.730878	1.17216
	1.21313	1.22429	0.850575	1.05245
	1.45125	1.39973	0.894569	1.24481
	1.52303	1.34869	0.834559	1.0512
	1.40522	1.28793	0.932867	0.919214
	1.42344	1.14995	0.903465	1.08644
	1.25022	1.356	0.873208	1.1768
	1.39516	1.28928	0.87541	0.916318
	1.54733	1.27693	0.920516	1.13835
	1.33831	1.31751	0.787065	1.20576
	1.46988	1.1154	0.798182	1.13073
	1.47511	1.26203	0.962963	1.15091
	1.59141	1.24257	0.784272	1.19149
	1.36889	1.26717	0.997722	0.922923
	1.478	1.31745	0.870283	1.11644
	1.54982	1.22367	0.915648	1.03303
	1.45602	1.18596	0.770476	1.25472
	1.44403	1.30429	0.774478	1.0793
	1.5146	1.31157	1.02062	1
	1.33541	1.28772	0.823656	1.25645
	1.30462	1.246	0.872318	0.981735
	1.41764	1.34911	0.802186	1.26128
	1.42694	1.27841	0.918919	0.95301
	1.53092	1.15741	1.01491	1.03908
	1.35233	1.15314	0.902857	1.02978
	1.37992	1.2684	0.869919	1.09268
	1.25221	1.30297	1.1587	1.2998
	1.42918	1.35055	0.676692	0.928042
	1.50786	1.36574	1.06355	1.13277
	1.37676	1.19585	0.951943	1.04
	1.31942	1.27467	0.85482	1.26627
	1.50671	1.27482	0.790419	0.907285
	1.3701	1.32213	0.835165	1.0835
	1.26389	1.31099	0.824167	1.14013
	1.44949	1.22842	0.832466	1.01447
	1.31106	1.32419	0.811512	1.0453
	1.38439	1.20252	0.854348	1.11111
	1.12267	1.28094	0.763298	1.14672
	1.4835	1.24443	0.916981	0.995927
	1.29463	1.1413	0.845894	1.02587
	1.39243	1.2435	0.899891	1.07782
	1.43267	1.27612	0.765267	1.06859
	1.36466	1.24549	0.93125	0.971831
	1.36667	1.31395	0.878427	0.996595
	1.38407	1.11035	0.778256	1.00615
	1.23896	1.4008	0.90121	0.841596
	1.46486	1.25402	0.737295	1.01412
	1.16268	1.32247	1.00271	0.979358
	1.50636	1.28591	1.03645	0.901293
	1.30399	1.21796	1.06536	1.0181
	1.38305	1.23346	0.795506	1.36411
	1.46755	1.25017	0.979769	0.941243
	1.38759	1.34745	0.842654	1.10635
	1.56854	1.16961	0.961358	1.12869
	1.47458	1.22529	0.976776	0.898402
	1.49229	1.34745	1.08614	1.0561
	1.56561	1.30573	0.89834	1.02122
	1.58762	1.26238	0.870168	1.00259
	1.2068	1.40054	0.892781	0.911215
	1.28854	1.19257	0.866393	0.971334
	1.39221	1.2888	0.98453	1.03772
	1.34738	1.316	0.938259	0.952438
	1.34677	1.29722	0.976829	0.935723
	1.39178	1.15544	0.830166	1.01222
	1.225	1.33201	0.839196	0.951482
	1.40231	1.2785	0.816943	1.09209
	1.51196	1.23414	0.856498	0.977027
	1.49307	1.13736	0.915133	1.04059
	1.43385	1.11911	0.96506	0.882647
	1.20492	1.27794	0.847128	0.931034
	1.44929	1.18563	0.891551	0.755183
	1.30539	1.15845	0.953519	0.893921
	1.34083	1.12315	0.972692	0.985861
	1.42369	1.20272	1	0.992157
	1.4158	1.14175	0.968	0.986585
	1.24224	1.10987	1.03338	0.977273
	1.41169	1.15337	0.911868	1.03422
	1.52257	1.09067	0.984058	1.02392
	1.40833	1.17203	0.858397	0.900724
	1.38848	1.26043	0.822126	1.02527
	1.37746	1.29032	1.0119	0.988722
	1.59794	1.12668	0.941099	0.885986
	1.41656	1.19644	0.794935	0.963115
	1.20698	1.24228	0.875472	1.01562
	1.47206	1.18563	0.923983	1.047
	1.28457	1.14115	0.977058	1.01892
	1.37155	1.27417	0.819038
	1.49286	1.14622	0.975186
	1.3055	1.24942	0.979319
	1.37196	1.27955	0.784369
	1.3913	1.24223	0.90281
	1.40645	1.14665	0.870183
	1.33498	1.27181	0.889583
	1.43409	1.23504	0.849938
	1.4598	1.18968	0.94942
	1.37368	1.26912	0.73
	1.1979	1.17251	0.850505
	1.26984	1.21826	0.809816
	1.41283	1.18187	0.957678
	1.38375	1.23409	0.881057
	1.38138	1.20859	0.944734
	1.57673	1.30599	0.821185
	1.3715	1.13723	0.834038
	1.2912	1.17961	0.804694
	1.29627	1.18475	0.97482
	1.41414	1.15381	0.898844
	1.51777	1.22099	0.816156
	1.32955	1.19558	0.889616
	1.47143	1.15074	0.940102
	1.31358	1.18978	0.958432
	1.39467	1.14434	0.763441
	1.316	1.28859	0.945652
	1.22868	1.21592	0.815118
	1.47969	1.20452	1.05208
	1.45007		0.806649
	1.46288		0.871591
	1.42912		0.961727
	1.48454		0.776316
	1.34846		0.953283
	1.49273		0.895374
	1.37099		0.912281
	1.51025		0.852775
	1.38801		0.838462
	1.53659		0.943017
	1.35658		0.747014
	1.53325		0.85941
	1.34663		0.748875
	1.42092		0.957895
	1.54312		0.92163
	1.31515		0.900463
	1.43651		1.08407
	1.34356		0.847059
	1.31547		0.938444
	1.35323		0.936709
	1.34012		0.708101
	1.28664		0.991003
	1.33089		0.772727
	1.25286		0.834942
	1.35386		0.804413
	1.44864		0.897158
	1.24798		0.775397
	1.39804		0.877672
	1.30399		0.903955
	1.37145		0.949468
	1.22751		0.817204
	1.28382		0.963534
	1.35821		0.909692
	1.28149		1.01754
	1.2289		0.905163
	1.40548		0.898969
	1.25939		0.793617
	1.26969		0.873684
	1.39076		0.885714
	1.37026		0.872228
	1.28062		0.981993
	1.39626		0.91309
	1.31187		0.865772
	1.41046		1.09453
	1.55575		1.05799
	1.33053		0.891164
	1.35267		0.796407
	1.24291		0.785404
	1.29372		0.869901
	1.42739		1.00748
	1.3058		0.958843
	1.26217		0.921384
	1.40934		0.954657
	1.32095		0.854962
	1.31195		0.835792
	1.29412		0.888152
	1.28771		0.790036
	1.27652		0.863636
	1.37971		0.82722
	1.30775		0.860941
	1.22558		0.74954
	1.45599		0.936118
	1.39563
	1.31034
	1.37931
	1.36708
	1.50682
	1.48912
