# Supplementary material for: Conformation of the nuclear pore in living cells is modulated by transport state
Source: eLife. 2020 Dec 21;9:e60654. doi: 10.7554/eLife.60654 (PMC7752133; doi:10.7554/eLife.60654)
Supplement: Figure 1—source data 1. [file elife-60654-fig1-data1.xlsx]

## Sheet: Figure1F_RigidLinkers
Name	0AA	1AA	2AA
Median	0.813071	1.87915	0.944558
First Quartile	0.735605	1.72909	0.872057
Third Quartile	0.887297	2.04042	1.00758
Data:	0.772414	1.78988	0.846608
	0.609467	1.71034	0.961712
	0.752874	2.37729	0.812332
	0.96729	1.95312	1.16201
	0.406513	1.92835	1.06306
	0.905444	1.87898	1.00813
	0.761438	1.39271	0.896774
	0.902174	2.27869	0.958199
	0.700306	1.9635	0.899083
	0.885965	1.89256	0.926554
	0.393443	1.53158	1.04762
	0.727829	2.02767	1.00775
	0.931741	2.01026	1.07207
	0.790164	1.78218	0.973494
	0.918994	1.91111	0.790503
	0.761364	1.82799	0.964803
	0.849711	1.96203	1.0787
	1.04	1.92453	0.960784
	0.751073	1.88987	0.808612
	0.948052	1.78644	0.889182
	1.01114	1.98802	1.03289
	0.685714	2.24691	0.896074
	0.741071	2.40698	0.973597
	0.425824	2.15894	0.976812
	0.968974	1.85581	0.941589
	0.748299	1.77249	0.845946
	0.721053	1.93684	0.975
	0.875	2.25397	0.89881
	0.85034	2	0.882022
	0.833333	2.12766	0.895408
	0.891473	1.39362	0.923077
	0.804233	1.59328	0.995025
	0.864151	1.48916	1.15481
	0.354793	1.56383	1.00601
	0.33871	1.74742	0.889734
	0.868966	1.91525	0.786364
	0.868664	1.69295	1.00946
	0.765217	1.97951	0.980216
	0.832432	1.89688	1.08114
	0.874359	1.81065	0.876448
	0.365633	1.82847	0.997183
	0.990991	1.40513	0.973585
	0.728395	1.37443	0.879365
	1.03155	1.92744	1.02122
	0.349306	2.14829	1.04509
	0.652174	1.78075	0.887399
	0.879699	1.69636	1.05074
	0.908367	1.78317	0.829721
	0.794582	2.01149	1.01709
	0.896552	1.7521	1.09091
	0.725146	1.88614	1.0922
	0.7	2.01832	1.12963
	0.840741	1.52577	0.854717
	0.759036	2.01734	1.03106
	0.784431	2.09121	0.916279
	1.04444	2.16352	0.831522
	0.776316	1.71359	1.11538
	0.927954	1.9834	0.811448
	0.884984	1.7931	0.96401
	0.774648	1.92262	0.85098
	0.778351	1.8392	0.815
	0.762162	1.85621	0.702532
	0.939577	1.95758	0.915989
	0.72314	1.52709	0.922509
	0.806452	1.87895	0.794737
	0.364162	2.30978	0.819095
	0.745098	2.04467	0.856522
	0.835329	1.60194	1.1245
	0.387919	1.90732	0.866667
	0.805031	2.00893	1.05474
	0.917722	2.01754	1.11691
	0.825758	1.56682	0.946058
	0.762295	2.048	0.904977
	0.899713	1.84615	1
	0.742574	1.6484	1.03926
	0.930481	2.16578	0.924855
	0.78853	1.74383	0.885593
	0.786802	1.71963	1.10513
	0.845133	1.93434	0.960152
	0.819113	1.39615	0.887218
	0.378449	2.35714	0.930636
	0.796178	1.87168	0.891304
	1.15315	1.86345	0.844884
	0.7875	1.97073	1.03139
	0.874396	1.96654	0.852632
	0.808219	2.18182	0.912863
	0.706856	2.41333	0.796791
	0.764706	1.60714	0.785185
	0.813433	1.71839	0.88381
	0.844262	1.80078	0.941685
	0.877193	2.08929	0.850543
	0.861671	2.19512	0.789203
	1.02073	1.93855	1.11013
	0.84507	1.62059	0.888525
	0.794872	2.26203	0.958564
	0.751773	2.13303	0.933526
	0.913846	1.7089	0.94831
	0.886076	2.2437	0.99322
	0.781377	1.97087	1.14497
	0.857955	2.05573	0.775599
	0.675824	1.99275	0.885813
	0.776398	1.96347	0.944954
	0.716463	1.84783	1.05096
	0.712389	1.71292	0.989362
	0.904	1.87633	0.892105
	0.837079	1.91441	1.08805
	0.98708	1.97595	0.911917
	0.852041	1.44242	0.871245
	0.72093	1.91061	1.13821
	0.908815	2.12632	0.920354
	0.939297	2	0.935673
	0.735409	1.78899	0.913607
	0.929448	1.73529	0.936508
	0.846626	1.65414	0.92145
	0.884615	1.94359	1.02469
	0.895623	2.20725	0.934028
	0.699153	1.91964	0.993377
	0.371795	1.98857	0.662338
	0.909091	1.68571	1.16568
	0.84953	1.77673	0.889706
	0.846774	1.87931	0.947712
	0.688235	2.11957	0.888889
	0.722222	2.25	0.944162
	0.886364	1.95187	0.763158
	0.382812	1.37918	0.806122
	0.831818	1.68208	1.01093
	0.87234	2.12355	0.79558
	0.896667	2.08163	1.03175
	0.738028	1.74583	0.948864
	0.4	2.09455	0.857143
	0.643902	2.17073	0.911565
	0.84739	1.80139	0.778325
	0.915929	1.76923	0.950192
	0.852349	1.81949	1.00792
	0.739394	1.8963	0.830258
	1.07258	2.38562	0.769231
	0.786885	1.98907	1.03621
	0.818182	1.72085	1.00315
	0.920455	1.52889	0.970588
	0.665	1.90765	0.826347
	0.332951	1.31624	0.908867
	0.905882	2.10764	0.978541
	0.774086	2.10714	0.978417
	0.43006	2.06728	1.09957
	0.355212	2.10857	0.900302
	0.939547	1.96281	0.953191
	0.877384	1.95722	0.877778
	0.737589	1.75	0.903683
	0.774834	1.5	1.07097
	0.951965	2.13441	0.911548
	1.0184	1.83051	0.835821
	0.374185	1.66216	0.967066
	0.915858	1.68636	0.891641
	0.755319	1.81006	0.918317
	0.728814	2.17899	0.792035
	0.953069	1.99351	0.99723
	0.738916	1.71975	1.0274
	0.790625	2.0904	1.14208
	0.736196	1.66337	0.92876
	0.630037	1.90504	1.03955
	0.807882	1.67354	0.850515
	0.77451	2.01672	0.894009
	0.90367	2.22917	0.88196
	0.755245	1.83432	0.856749
	0.652406	1.82099	1.02844
	0.854795	1.82	0.993103
	1.03535	2.10909	0.912127
	0.733333	2.59574	0.994065
	0.881857	1.96875	0.926282
	0.824324	1.83607	1.05405
	0.812709	2.12683	0.92
	0.855932	1.64224	1.06612
	0.859649	1.79245	1.06735
	0.98	2.06324	0.739645
	0.882051	1.81726	1.01578
	0.390213	2.21505	0.959866
	0.834459	2.05926	1.01572
	0.967136	1.98556	0.839779
	0.83908	1.8439	0.918605
	0.844106	1.8681	1.04261
	0.79646	1.47293	1.00643
	0.899598	1.96703	0.976109
	0.357337	1.85401	0.870968
	0.408346	1.87124	0.836735
	0.742021	2.11111	0.902299
	0.365753	2.11364	1.08359
	0.827731	1.57576	0.966912
	0.767857	1.91051	0.843373
	0.718232	2.25	1.00304
	0.813636	2.17695	0.94964
	0.863248	1.54294	0.807487
	0.800712	1.60246	0.785714
	0.857988	1.75978	0.711246
	0.74124	2.15789	1.03153
	0.860068	1.94416	0.972477
	0.412658	1.7844	0.955923
	0.638298	1.80102	1.03846
	0.82337	1.83183	1.20625
	0.832402	2.05185	0.845805
	0.596591	2.1907	0.992278
	0.730769	1.82986	0.955556
	0.722433	2.18232	1.06235
	0.401669	1.56731	0.85
	0.809836	1.78659	0.93994
	0.8	1.8	0.94
	0.846154	1.6806	0.852071
	0.767606	1.69412	0.964758
	0.374674	1.53722	1.07364
	1.09337	1.95669	0.959799
	0.811966	1.99412	1.06286
	0.945559	2.28819	0.946593
	0.994709	2.07027	0.996875
	0.84	1.9507	1.14824
	0.972028	1.67273	0.891753
	0.79322	1.85263	0.843014
	0.954918	1.99512	1.01217
	0.747191	1.93939	1.00707
	0.915612	1.54508	1.06424
	0.828704	2.34529	0.809399
	0.819149	1.97925	0.945545
	0.724444	1.39423	0.981073
	0.823799	2.16575	1.03416
	0.826923	2.01948	0.791667
	1.0112	2.13043	0.913043
	1.10592	2.17143	0.959184
	0.909574	2.07027	0.874494
	0.685619	1.76119	0.883085
	1.00758	1.72703	1.00215
	0.791209	1.80952	0.932584
	0.764103	1.8254	0.870968
	0.376116	2.06746	0.927928
	0.715447	2.16168	0.960993
	0.815789	1.72414	0.84186
	0.870192	2.2161	0.905512
	0.804217	1.76292	1.02903
	0.421995	2.12385	0.786802
	0.817647	1.8227	1.00542
	0.891429	1.7619	0.949704
	0.35668	1.53175	0.842239
	0.357534	1.53521	0.719577
	0.770642	1.73889	0.973451
	0.811594	1.78545	0.987654
	0.747253	2.12364	1.02372
	0.928571	2.44966	0.989529
	0.865435	1.52071	0.951872
	0.818182	1.75978	1.04167
	0.887879	1.41296	0.963255
	0.79661	1.85577	0.787162
	0.796791	1.66812	0.923469
	0.941176	1.83404	1.04061
	0.846774	1.84409	0.991781
	0.978541	1.75	0.763723
	0.708571	2.05789	0.983819
	0.778378	1.82081	0.882353
	0.795455	1.76966	0.92654
	1.01775	1.94424	0.942363
	0.83209	1.84539	0.960894
	0.745763	1.78199	0.890476
	0.91129	1.90365	0.984733
	0.412983	2.22798	0.834171
	0.846875	1.55866	0.844828
	0.950156	1.71287	0.80429
	0.801418	2	1.03429
	0.867725	2	0.962162
	0.378545	1.92935	0.76
	0.710611	1.94677	1.1375
	0.388325	1.34112	1.08549
	0.848101	2.23871	0.952909
	0.734824	1.68261	0.854545
	0.955026	1.95341	0.825806
	0.361393	1.79487	0.790576
	0.69598	1.84188	1.00958
	0.632	1.62025	1.06962
	0.830588	1.94817	0.94702
	0.924855	1.91837	0.871036
	0.842466	2.05172	1.01815
	0.791139	1.56356	0.92219
	0.929078	1.35808	0.855219
	0.803653	1.7907	0.975791
	0.980263	2.21399	0.859116
	0.381366	1.62431	0.866995
	0.671053	1.50761	0.935849
	0.806202	1.69101	1.08718
	0.90884	1.61214	0.763441
	0.79085	1.61991	0.982405
	0.760618	1.74783	1.04124
	0.875	1.40094	0.955844
	0.893333	1.71061	0.949686
	0.904762	1.65143	1.02556
	0.385986	2.04511	0.818386
	0.990683	1.79412	0.782991
	0.942675	1.79273	0.934959
	0.827465	1.9204	0.811594
	0.90708	1.54545	0.983278
	0.71223	1.38372	0.798722
	0.816667	2.21277	0.989744
	0.629758	1.95926	0.896825
	0.978022	1.71538	1.02956
	0.887608	1.98492	0.902857
	0.810811	2.24852	1.09601

## Sheet: Figure1G_FlexLinkers
Name	0AA	1AA	2AA
Median	1.18937	1.168	1.25874
First Quartile	1.10597	1.07353	1.15834
Third Quartile	1.27414	1.2568	1.34526
Data:	1.08191	1.17045	1.40431
	1.28794	0.941176	1.43182
	1.29841	1.09615	1.40535
	1.19305	1.23958	1.43493
	1.16432	1.04255	1.29644
	1.41509	1.07558	1.13448
	1.09746	1.00667	1.32361
	1.19636	1.17621	1.20141
	1.18301	1.09091	1.31839
	1.11511	1.18705	1.17557
	1.40588	1.18216	1.39946
	1.11589	1.08673	1.1993
	1.2071	1.23649	1.02807
	1.48315	1.08264	1.0786
	1.34496	1.11312	1.29832
	1.14583	1.26777	1.41047
	1.32911	1.3299	1.16206
	1.11163	1.14957	1.04945
	1.17297	1.02381	1.39005
	0.965889	1.06032	1.37615
	1.38154	1.18227	1.13661
	1.31429	1.09408	1.1681
	1.22685	1.26126	1.27027
	1.16456	1.13707	1.16138
	1.32405	1.28986	1.37963
	0.996933	1.24359	1.27189
	1.2724	0.993056	1.11111
	1.11053	1.27803	1.30499
	1.26744	0.970588	1.12821
	1.09539	1.20385	1.22034
	1.24885	0.849462	1.15335
	1.20656	1.15385	1.02956
	1.20548	1.08511	0.903727
	1.09804	1.02258	1.3309
	1.32215	1.19898	1.29812
	1.16667	1.23022	1.50716
	1.38095	1.00535	1.28205
	1.18667	1.02308	1.35526
	1.15057	1.1752	1.12157
	1.39594	1.01869	1.17526
	1.02326	1.16055	1.22118
	1.32423	1.0396	1.12292
	1.28375	1.25714	1.28788
	1.29934	1.13389	1.31643
	1.28859	1.26641	1.112
	1.30168	0.984709	1.30946
	1.07951	1.03315	1.14685
	1.2139	1.22963	1.07115
	1.24828	1.08365	1.3744
	1.33766	1.01684	1.09643
	1.23077	1.0297	1.06615
	1.1453	1.21429	1.4382
	1.09479	1.03933	1.27137
	1.11485	1.12264	1.40189
	1.23346	1.43548	1.10372
	1.19214	1.19527	1.14741
	1.2	1.1641	1.17937
	1.1215	1.15075	1.35659
	1.22353	1.24176	1.22148
	1.43478	1.16608	1.45485
	0.936975	1.29046	1.26421
	1.19811	1.19463	1.2818
	1.11749	1.27757	1.21583
	1.02214	1.14978	1.19216
	1.223	1.13953	1.15901
	1.0709	1.2268	1.24371
	0.915942	1.45312	1.21519
	1.21127	1.21805	1.21168
	1.11765	1.06383	1.34731
	1.18852	1.24627	1.06271
	1.09278	0.863208	1.17969
	1.05243	1.22727	1.43624
	1.075	1.16058	1.1413
	1.06154	1.27536	1.38926
	1.32615	1.25105	1.04255
	1.23853	1.06383	1.18265
	1.21395	1.00439	1.19014
	1.19672	1.11409	1.34783
	1.17563	1.16109	1.10658
	1.45981	1.14847	1.22823
	1.12871	1.13295	1.26796
	1.03754	1.05805	1.33025
	1.41049	1.15129	1.40764
	1.2122	1.22692	0.909348
	1.02717	1.16774	1.35768
	1.51039	1.09434	1.13681
	1.16374	1.2389	1.26829
	1.29326	0.771784	1.41912
	1.30603	1.15584	1.37965
	1.17614	1.25681	1.40796
	1.17647	0.850847	1.23228
	1.16944	1.02096	1.41304
	1.20982	1.35217	1.05743
	1.2732	1.16008	0.983819
	1.05242	1.15563	1.20489
	1.14141	1.25403	1.17172
	1.29483	0.874346	1.37168
	1.20904	1.02367	1.18801
	1.2069	1.14644	1.28571
	1.35882	1.10284	1.13115
	1.09057	1.19343	1.07303
	1.13502	1.1597	1.26016
	1.18956	1.15084	1.35484
	1.30337	1.272	1.43243
	1.11465	1.03261	1.52419
	1.13107	1.33649	1.29861
	1.07788	1.12803	1.2428
	1.28621	0.976303	1.32
	1.11821	1.5463	1.45771
	1.20175	1.06599	1.18959
	1.22464	1.15175	1.11417
	1.00422	1.15476	1.34021
	1.14286	0.989529	0.996377
	1.27796	1.20468	1.40244
	1.18216	1.29278	1.36792
	1.15512	0.943128	1.27426
	1.12911	1.17188	1.32637
	1.27273	1.09091	1.23919
	1	1.24537	1.15823
	1.12353	1.14828	1.30081
	1.13755	1.17029	1.12704
	0.990566	1.02116	1.39103
	1.26836	1.21166	1.15385
	1.26471	1.35714	1.26241
	1.19355	1.42627	1.14223
	1.29577	1.21212	1.15175
	1.22507	1.05405	1.36278
	1.22868	1.20229	1.219
	1.1745	1.01258	1.28261
	1.19807	0.90785	1.37621
	1.02265	1.17714	1.25175
	1.13846	1.20856	1.4623
	1.07942	0.992337	1.12136
	1.25714	1.11005	1.23885
	1.10117	1.01307	1.31319
	1.28016	1.00368	1.37408
	1.13281	1.295	1.28095
	0.939623	1.14286	1.41278
	1.09191	1.1976	1.26056
	1.24215	1.02167	1.24217
	1.18919	1.06642	1.43333
	1.25296	0.916399	1.11312
	1.088	1.30814	1.29167
	1.10938	1.06806	1.39224
	1.2217	1.18431	1.36019
	1.07031	1.31132	1.48101
	1.36772	1.08108	1.29694
	1.36145	0.974194	1.13655
	0.978261	1.11682	1.30193
	1.05245	1.28497	1.17984
	1.173	0.809524	1.28953
	1.04659	1.25676	1.16779
	1.16038	1.42056	1.48357
	1.30809	1.32932	1.3293
	1.38095	1.21636	1.28856
	1.10215	1.31939	1
	1.26536	1.19283	1.20253
	1.26603	1.26697	1.17178
	1.29859	1.10048	1.27778
	1.36269	1.025	1.075
	1.06545	1.25134	1.38529
	1.20717	1.00469	1.26452
	1.21337	1.08841	1.28775
	1.19124	1.0914	1.47811
	1.16333	1.29111	1.25472
	1.16667	1.06383	1.25698
	1.38	1.33838	1.16287
	1.22128	0.97076	1.42773
	1.29907	1.57252	1.37387
	0.938776	1.36184	0.955665
	1.35014	1.21552	1.33511
	1.06991	1.28042	1.16667
	1.08949	1.05323	1.12766
	1.12202	1.2906	1.17879
	1.02116	1.12931	1.28537
	1.37069	1.22043	1.12997
	1.16509	1.28936	1.39548
	1.03343	1.07895	1.30811
	1.1776	1.21875	1
	1.212	1.22165	1.28358
	1.09649	1.19853	1.20365
	0.860169	1.12097	1.11675
	1.11243	1.05063	1.21951
	1.27446	1.15888	0.977528
	1.27027	1.46637	1.21727
	0.984026	1.37815	1.0367
	1.06923	1.27679	1.36444
	1.24375	1.21023	1.34694
	1.26007	1.13295	1.06343
	1.12844	1.18103	1.26761
	1.1068	1.1281	1.11071
	1.03892	1.22128	1.07778
	1.03211	0.96	1.28082
	1.35884	0.986842	1.47475
	1.08537	1.10215	1.31045
	1.14286	1.26316	1.34737
	1.07429	1.28333	1.28981
	1.53586	1.14575	1.44056
	1.23377	1.15709	1.25606
	1.2899	1.28877	1.26257
	1.28767	1.39348	1.3136
	1.25692	1.35531	1.25991
	1.01544	1.16846	1.11364
	1.37634	1.14167	1.04262
	1.0991	1.04433	1.27876
	1.19565	1.32065	1.27434
	1.08929	0.9375	1.17021
	1.26738	1.42857	1.23358
	0.982517	1.44512	1.23344
	1.15953	1.46304	1.22406
	1.35393	1.25589	1.43258
	1.125	1.44082	1.14
	1.5	1.32534	1.61069
	0.99635	1.32308	1.12171
	1.27833	1.01128	1.21094
	1.5	1.1746	1.20769
	1.29004	0.983516	1.33333
	1.14337	1.09091	1.16547
	1.05229	1.20207	1.09214
	1.12287	1.18705	1.24515
	1.06883	0.95679	1.42478
	0.95057	1.28747	1.07692
	1.13732	1.48729	1.06472
	1.04931	1.27177	1.06316
	1.16838	1.25417	1.41279
	1.42083	1.14865	1.40625
	1.27164	1.03497	1.19583
	1.13514	1.37245	1.27837
	1.095	1.19079	1.04369
	1.32609	1.22705	1.03333
	1.23288	1.21818	1.26042
	0.982609	1.02809	1.52758
	1.13262	1.3883	1.25397
	1.11935	0.986014	1.05263
	1.34028	1.26337	1.25941
	1.09266	0.980892	1.28205
	1.06452	1.32919	1.09504
	1.23144	1.24336	1.252
	1.09236	1.20253	1.28764
	1.19209	1.15126	1.23006
	1.14341	1.20988	1.12741
	1.46483	1.05581	1.39433
	1.26975	1.04435	1.28424
	1.20392	1.14	1.21928
	1.30142	1.27368	1.24752
	1.23204	0.985075	1.13305
	1.10569	1.10396	1.20073
	1.21221	1.22407	1.3067
	1.19891	1.34909	1.55376
	1.25843	1.09524	1.33053
	1.24046	1.07955	1.33989
	1.13667	1.28	1.24755
	1.02694	1.1	1.31211
	1.24373	1.12346	1.14356
	0.992908	1.20982	1.41769
	1.17121	1.25157	1.55732
	0.986607	1.29353	1.19342
	1.29032	1.10288	1.42857
	1.15497	1.37349	1.2242
	1.29427	1.28571	1.27018
	1.21008	1.16732	1.4932
	1.38058	1.27236	1.32117
	1.29755	1.02956	1.21851
	1.32518	1.34184	1.36902
	1.15099	0.961957	1.26154
	1.21562	1.16574	1.0549
	1.02564	1.07778	1.18049
	1.11558	1.18797	1.01538
	1.19919	1.22637	1.11905
	1.16	0.85	1.39535
	1.3194	1.01102	1.36979
	1.17986	1.07285	1.38032
	1.10788	1.30857	1.25806
	0.987013	1.10072	1.41791
	1.40942	1.23448	1.27184
	1.31006	1.3236	1.11818
	1.35569	1.27629	1.3494
	1.12811	1.03571	1.29545
	1.19308	1.26087	1.17355
	0.945652	1.03256	1.2446
	0.915663	1.30137	1.24104
	1.35945	1.0463	1.12955
	1.28446	1.20588	1.06908
	1.1841	1.16825	1.22768
	1.35798	1.32843	1.08
	1.04333	1.27174	1.29062
	1.41667	1.22008	1.37027
	1.37632	1.13551	1.31971
	1.1561	1.30435	1.20089
	1.07048	1.1087	1.29297
	1.35841	1.10227	1.23242
	1.24561	1.12821	1.39277
	0.898551	1.03687	1.27364
	1.15436	1.20952	1.17391
	1.17085	1.24103	1.15038
	1.18378	1.25	1.15866
	1.24671	1.18672	1.34715
	1.34722	1.28571	1.31963
	1.25	1.26	1.0416
	1.25987	1.20395	1.21774
