# Supplementary material for: Conformation of the nuclear pore in living cells is modulated by transport state
Source: eLife. 2020 Dec 21;9:e60654. doi: 10.7554/eLife.60654 (PMC7752133; doi:10.7554/eLife.60654)
Supplement: Figure 2—source data 1. [file elife-60654-fig2-data1.xlsx]

## Sheet: Figure2A_Nup133
Name	Nup133_8a	Nup133_8b	Nup133_9a	Nup133_9b
Median	1.07061	1.07499	1.2887	1.28989
First Quartile	1.00505	1.02928	1.20811	1.21017
Third Quartile	1.1345	1.1307	1.36468	1.36696
Data:	1.01304	0.968635	1.24214	1.32863
	1.00707	1.10415	1.43103	1.07764
	1.21248	1.08169	1.24571	1.24144
	0.986464	1.15226	1.29207	1.16282
	1.13889	0.959721	1.22857	1.28423
	1.12178	1.04023	1.23464	1.24826
	1.25824	1.02766	1.2401	1.33913
	1.25763	1.03693	1.31707	1.24171
	1.11111	1.006	1.31478	1.26558
	1.38926	1.25227	1.18998	1.25123
	0.940754	0.93345	1.46314	1.30806
	1.14562	1.12297	1.33645	1.22411
	1.0602	1.15913	1.30361	1.16082
	0.816585	1.13372	1.26776	1.22204
	1.11803	1.01896	1.22059	1.37867
	1.08666	1.0411	1.43113	1.22271
	1.08694	1.1809	1.36145	1.5729
	1.02683	1.18555	1.13814	1.08501
	1.09912	0.995947	1.13038	1.3137
	1.15342	1.13985	1.32029	1.33056
	1.0227	1.01695	1.4212	1.43897
	1.0462	1.09478	1.55095	1.25407
	0.978692	0.972028	1.379	1.58385
	1.10667	0.98219	1.10334	1.37866
	0.826176	1.12646	1.2592	1.43025
	1.12403	1.03185	1.19547	1.34719
	1.22634	1.13078	1.11172	1.19959
	1.21339	1.02968	1.40838	1.22452
	1.1012	1.18403	1.06891	1.34198
	1.13097	1.09032	1.27959	1.04722
	0.978	1.08776	1.2571	1.36316
	1.06783	1.00118	1.46292	1.60908
	1.05723	0.955785	1.25462	1.2167
	0.956607	1.05276	1.19626	1.34458
	1.16005	1.18174	1.43111	1.11707
	1.01815	0.936311	1.4491	1.28177
	0.93576	1.1549	1.09776	1.45309
	1.26628	1.17498	1.17346	1.1008
	1.1471	1.08955	1.34965	1.23444
	1.11066	1.03343	1.50306	1.35334
	1.0155	1.20548	1.13838	1.22511
	1.14871	0.902834	1.5301	1.34347
	1.00407	1.14297	1.31226	1.37037
	1.07585	1.09305	1.27338	1.40851
	1.12754	1.1362	1.33333	1.27813
	1.1663	0.949726	1.2459	1.4018
	1.01141	1.09456	1.27131	1.35724
	0.931115	1.07221	1.08217	1.42296
	1.07379	0.986506	1.36604	1.35571
	1.05567	1.2109	1.07128	1.32624
	1.18502	1.18286	1.28867	1.10152
	1.00898	1.1577	1.28185	1.45048
	0.971698	1.12979	1.31604	1.23494
	1.16892	1.03253	1.41619	1.24293
	1.11096	1.09459	1.07987	1.37014
	0.907333	1.08705	1.40066	1.39947
	1.02329	1.14298	1.54691	1.40529
	1.22151	1.09483	1.29688	1.39015
	1.15489	1.04402	1.20408	1.20854
	1.0459	0.894415	1.31329	1.38219
	1.09209	1.21698	1.23106	1.2468
	1.03941	0.942775	1.50911	1.31826
	1.11176	0.92052	1.06476	1.1276
	1.11321	0.990606	1.28883	1.27542
	1.08406	1.08304	1.40708	1.1767
	1.07224	1.16048	1.13392	1.32932
	1.13068	1.04657	1.37384	1.26955
	1.05206	0.897181	1.28872	1.22737
	1.01954	1.18031	1.46667	1.38062
	1.12859	1.09461	1.34267	1.37105
	1.0645	1.21323	1.3321	1.27664
	0.967936	0.948997	1.06276	1.20339
	1.10991	0.990301	1.0495	1.278
	0.969125	1.01387	1.46845	1.2
	1.08923	1.06557	1.23644	1.12524
	1.24422	1.04152	1.23087	1.09498
	1.04578	0.964286	1.11814	1.15213
	1.17733	0.921739	1.20541	1.0515
	0.751558	1.37954	1.29931	1.20998
	1.10895	1.05137	1.41655	1.29638
	1.13253	1.04311	1.26453	1.47363
	1.15445	1.15401	1.35375	1.0887
	0.883117	1.11722	1.42271	1.23669
	1.09416	1.06466	1.10923	1.3098
	1.11466	1.01176	1.3461	1.13333
	0.965185	1.12794	1.37199	1.37557
	1.05353	0.885234	1.21165	1.4026
	0.966068	0.925638	1.12571	1.19876
	0.91806	1.01502	1.25592	1.31296
	1.07028	1.15063	1.55266	1.11406
	1.14471	0.978511	1.3887	1.27654
	1.18519	1.05132	1.22245	1.37861
	1.12195	1.09626	1.42059	1.18519
	0.801628	1.07558	1.17302	1.5283
	1.13965	1.06939	1.41103	1.26158
	1.01626	1.02029	1.36464	1.31185
	1.09267	1.27611	1.18949	1.21356
	1.04186	0.971347	1.21411	1.34623
	0.986434	1.06307	1.0206	1.28955
	1.13137	1.04485	1.30542	1.23926
	1.01408	1.0781	1.58058	1.05508
	0.964799	1.09937	1.21698	1.3587
	1.08772	1.04628	1.26928	1.44567
	1.05091	1.16133	1.2509	1.16007
	1.05944	1.01533	1.37221	1.29368
	0.96978	1.15252	1.34127	1.21584
	1.0881	1.19661	1.15142	1.31459
	1.03022	1.19374	1.32962	1.36699
	1.09489	1.10942	1.35123	1.15971
	0.843373	1.18642	1.33787	1.31473
	0.969212	1.09221	1.14257	1.07875
	1.09257	1.03978	1.32871	1.21296
	1.01969	1.18762	1.39843	1.48225
	1.03504	1.04872	1.25666	1.375
	1.23622	1.00539	1.18646	1.27345
	1.08111	1.04274	1.11884	1.12109
	1.15763	1.0965	1.34513	1.31838
	1.05601	1.09887	1.09904	1.31595
	1.15762	1.07359	1.16877	1.46911
	1.26367	1.12845	1.38569	1.23044
	1.0016	1.00147	1.32383	1.27571
	1.17474	1.06171	1.32491	1.17769
	1.06393	1.16722	1.31322	1.2154
	1.06919	1.02176	1.3329	1.54695
	1.21024	1.1629	1.18931	1.25692
	0.964931	1.09764	1.51899	1.39254
	1.13821	1.2212	1.2892	1.1975
	1.14209	1.10177	1.29668	1.20402
	0.903093	1.00739	1.39648	1.20631
	1.0608	1.01778	1.34595	1.41077
	1.21402	1.01157	1.48375	1.49719
	1.07964	1.12486	1.24086	1.24236
	0.950459	1.07302	1.37567	1.4334
	1.17068	1.03345	1.13149	1.36856
	1	1.06264	1.45344	1.19932
	1.1848	1.17589	1.1489	1.42402
	1.17095	1.09811	1.2309	1.18985
	1.08903	1.15094	1.27167	1.42181
	1.04301	1.00871	1.17115	1.42297
	1.09244	1.23834	1.17925	1.37697
	1.02415	1.11372	1.30897	1.46176
	1.08705	1.09043	1.20798	1.36204
	1.10805	1.0183	1.29319	1.34969
	0.97619	1.24852	1.45817	1.248
	0.837542	1.06016	1	1.52973
	1	1.23354	1.12655	1.36218
	0.965347	1.03518	1.0746	1.45913
	1.15183	1.08877	1.33145	1.10962
	1.01196	1.04147	1.37028	1.15249
	1.07264	1.04525	1.25075	1.27299
	1.08842	1.12649	1.50583	1.26954
	1.05879	1.09405	1.29354	1.31953
	1.12432	1.10129	1.29476	1.34656
	0.958146	0.941833	1.00932	1.17534
	1.10929	1.01386	1.29584	1.26201
	1.16389	1.10805	1.36559	1.37976
	1.04427	1.0423	1.20392	1.36686
	1.09682	1.07223	1.18785	1.21549
	1.04892	1.03875	1.33333	1.31953
	1.26667	1.09033	1.52927	1.28671
	1.08802	1.20081	1.43788	1.39766
	0.986066	0.986719	1.07324	1.48842
	0.994131	1.06083	1.27571	1.20232
	1.10548	0.924078	1.329	1.53899
	0.978395	1.20372	1.27746	1.32343
	1.01468	1.07277	1.26414	1.29424
	0.997934	1.06935	1.22991	0.943493
	1.1962	1.09524	1.02244	1.2407
	1.2193	0.930414	1.33398	1.32821
	1.16122	1.20732	1.3595	1.14772
	0.981707	1.0181	1.39472	1.2514
	1.04324	1.09571	1.35392	1.27188
	0.986667	1.04496	1.39122	1.36218
	1.26057	1.05506	1.21081	1.2997
	1.31924	1.08613	1.27813	1.35825
	0.945098	0.975826	1.17342	1.13182
	1.31549	1.02296	1.18799	1.20623
	1.12973	0.9747	1.34873	1.23058
	1.13844	1.09302	1.19122	1.18415
	1.05042	1.11887	1.26809	1.21397
	1.00071	1.02852	1.2123	1.41774
	1.10832	1.18085	1.20507	1.36852
	0.985281	1.02659	1.41737	1.29972
	1.02422	1.16332	1.08407	1.16548
	1.06732	1.13503	1.28511	1.31011
	1.06747	1.08568	1.28684	1.18566
	1.06789	1.03517	1.32083	1.12078
	1.11209	1.19442	1.18094	1.03594
	1.04167	1.11275	1.29806	1.37727
	1.13515	1.04964	1.28645	1.22699
	0.876588	1.12638	1.39576	1.35163
	0.818474	1.05291	1.48213	1.07923
	1.0905	1.13048	1.25796	1.31782
	1.02957	1.10178	1.16648	1.26033
	0.994687	1.04866	1.09464	1.1649
	1.21623	0.979849	1.09834	1.28764
	1.13621	1.14274	1.34259	1.29978
	1.12794	1.03736	1.31098	1.15551
	1.05389	1.02353	1.21628	1.62891
	1.09238	1.09618	1.15914	1.0928
	0.951495	1.0671	1.30962	1.236
	1.12952	1.11727	0.99449	1.49725
	1.17745	1.04931	1.33135	1.31638
	1.06493	1.03654	1.43696	1.23062
	1.00799	1.0369	1.36857	1.43419
	1.00372	1.13899	1.26683	1.28448
	1.14378	1.11739	1.16807	1.25581
	1.18329	1.16704	1.33047	1.22222
	1.16053	0.977454	1.26495	1.33737
	0.95583	1.03791	1.46822	1.30401
	1.00818	1.04422	1.21525	1.33149
	1.33886	0.981257	1.24357	1.2456
	1.18117	1.06639	1.45974	1.375
	1.18061	1.12393	1.23004	1.16893
	1.03974	1.18622	1.29924	1.14487
	0.96301	1.04599	1.1217	1.4242
	1.20437	1.09959	1.25077	1.33508
	0.916667	0.984443	1.12427	1.29023
	1.07462	0.948009	1.23913	1.39887
	1.11802	1.03862	1.16453	1.36207
	1.05685	1.14486	1.34321	1.52426
	0.887741	1.10443	1.49923	1.33956
	1.11512	1.09462	1.38529	1.43038
	1.12746	0.918951	1.37875	1.09511
	1.05114	1.06154	1.46317	1.38337
	1.06403	1.09427	1.2969	1.15385
	1.03085	1.21791	1.16566	1.16482
	1.00855	1.07421	1.28659	1.0766
	1.09011	1.03612	0.923688	1.29498
	1.21163	1.16237	1.06287	1.28662
	1.09878	1.13448	1.20714	1.22857
	1.17739	1.29419	1.37139	1.19433
	1.01724	1.08997	1.20083	1.1706
	1.05487	1.15992	1.36643	1.21604
	1.07094	1.12583	1.24047	1.37993
	0.956354	1.15339	1.2403	1.48223
	1.09091	0.945778	1.18018	1.29637
	1.22717	1.03159	1.23529	1.32802
	1.12512	1.09182	1.40403	1.1581
	0.91962	1.07592	1.34158	1.09659
	1.14513	1.07699	1.42575	1.08423
	1.00438	1.03028	1.43606	1.16104
	1.05954	1.0718	1.25568	1.1127
	1.1611	1.07466	1.40261	1.34021
	0.974869	0.87722	1.1047	1.39225
	0.827617	1.01175	1.20848	1.43103
	1.06231	0.982833	1.28425	1.16561
	1.01254	1.1761	1.36477	1.30492
	0.939734	1.14273	1.36988	1.31429
	0.991525	1.08772	1.31755	1.2992
	1.15272	1.01297	1.31673	1.09887
	1.04418	1.12876	1.1271	1.30097
	1.14322	0.931105	1.52686	1.42162
	1.03609	1.12584	1.35346	1.26421
	0.834698	1.23793	1.46659	1.19391
	1.07738	1.10862	1.19732	1.3544
	1.05042	1.13616	1.36626	1.40636
	0.831587	0.928496	1.55278	1.26849
	1.25012	1.18813	1.2415	1.35645
	1.06582	1.02696	1.32474	1.22581
	1.09901	1.17956	1.34821	1.49114
	1.1766	1.10889	1.42868	1.30898
	0.985507	1.07253	1.21483	1.27611
	1.02638	1.108	1.09893	1.49649
	0.98	1.17733	1.4589	1.25194
	0.996269	1.00338	1.21439	1.33149
	1.07976	1.06397	1.27362	1.31866
	0.905958	1.07248	1.22249	1.26815
	1.234	0.928139	1.54942	1.42019
	0.946853	1.10814	1.23905	1.27987
	1.09467	1.06282	1.34512	1.28535
	1.11636	0.947569	1.09896	1.15009
	0.926692	1.02802	1.2789	1.34955
	1.02695	0.991247	1.30573	1.23861
	1.19969	1.04444	1.41716	1.36685
	0.972912	1.07574	1.27629	1.33333
	1.0426	1.17818	1.27515	1.37037
	1.0123	1.1083	1.4407	1.3075
	1.10256	1.2041	1.24719	1.10034
	1.05439	1.10936	1.20598	1.37843
	1.10691	1.04952	1.31489	1.25478
	1.14781	0.987062	1.29892	1.21074
	1.04211	1.19688	1.39785	1.12484
	0.98672	1.06714	1.2276	1.30298
	1.13238	1.02914	1.31334	1.25355
	0.945289	1.05024	1.25322	1.16038
	1.13138	1.24246	1.26115	1.14082
	1.18975	1.05122	1.31184	1.33004
	1.18072	1.05678	1.34173	1.41141
	0.886288	1.15321	1.35357	1.7439
	1.07103	1.07533	1.06344	1.34257
	0.99196	1.14482	1.35465	1.2974
	1.15152	1.20142	1.32937	1.26087
	1.13175	1.05071	1.25922	1.45203
	0.808725	1.1635	1.29511	1.12721
	1.02408	1.07881	1.3194	1.2512
	1.17367	1.18046	1.11741	1.32492
	1.15575	1.06431	1.3647	1.13449
	0.986913	1.05969	1.21333	1.47363
	1.27904	1.11297	1.23614	1.44242

## Sheet: Figure2B_Nup93
Name	Nup93_5	Nup93_6
Median	1.2469	1.1855
First Quartile	1.16952	1.09054
Third Quartile	1.32586	1.25148
Data:	1.50445	1.20161
	1.39268	1.12405
	1.11929	1.25633
	1.27835	1.2338
	1.16883	1.45291
	1.34037	1.32249
	1.27778	1.19962
	1.29084	1.15948
	1.1701	1.13258
	1.57764	1.0719
	1.00265	1.2087
	1.20924	1.12857
	1.28571	1.17544
	1.341	1.0076
	1.37241	1.21412
	1.24615	1.04089
	1.24416	1.35971
	1.49234	1.24921
	1.20141	1.2479
	1.25	1.30398
	1.29721	1.22922
	1.47772	1.18533
	1.16053	1.09677
	1.52226	1.17778
	1.44416	1.10096
	1.2193	1.28423
	1.25424	1.06478
	1.24009	1.2
	1.28854	1.13937
	1.31211	1.24197
	1.18534	1.20576
	1.32598	1.25951
	1.29276	1.26222
	0.980723	1.16827
	1.28308	1.18721
	1.23129	1.0738
	1.32444	1.11502
	1.11982	1.18669
	1.30749	1.02905
	1.21944	0.928315
	1.27778	1.17549
	1.15593	1.19742
	1.30758	1.02825
	1.24736	1.02206
	1.38244	0.95122
	1.23984	1.14607
	1.4499	1.24841
	1.20323	1.10458
	1.19629	1.217
	1.1108	1.22823
	1.19795	1.33206
	1.48758	1.3109
	1.49795	1.40514
	1.13249	1.40841
	1.24242	1.1875
	1.23364	1.08639
	1.17849	1.30469
	1.27675	1.09848
	1.25285	0.948339
	1.31409	1.31356
	1.34066	1.06957
	1.18482	1.19881
	1.13819	1.19614
	1.2931	1.07818
	1.13859	1.37826
	1.22807	1.09744
	1.12075	1.19141
	1.61682	0.92163
	1.27294	1.18559
	1.3431	1.09016
	1.17097	1.04074
	1.34839	1.21515
	1.35665	1.02874
	1.2887	1.19945
	1.24309	1.45508
	1.16552	1.03143
	1.09063	1.41176
	1.29322	1.17699
	1.13147	1.14497
	1.4817	1.0512
	1.16076	1.20064
	1.3255	1.21228
	1.07239	1.39908
	1.19436	0.979695
	1.33853	1.24
	1.49553	1.24779
	1.40113	1.17221
	1.21957	1.12
	1.4915	1.21569
	1.50207	1.30245
	1.06443	1.1292
	1.00704	1.1102
	1.40251	1.25222
	1.24697	1.17606
	1.05252	1.24932
	1.08471	1.30876
	1.16558	1.28767
	1.3011	1.1137
	1.16	1.16812
	1.17435	1.06392
	1.29745	1.06604
	1.21555	1.2249
	1.40047	0.965636
	1.28716	1.25
	1.36675	1.224
	1.29766	1.43617
	1.25612	1.31675
	1.39787	1.20875
	1.30561	1.26807
	1.1126	1.22581
	1.07365	1.01866
	1.20603	1.1625
	1.18638	1.08738
	1.32043	1.24198
	1.29032	1.25279
	1.26079	0.992439
	1.3378	1.18327
	1.09136	1.12549
	1.2039	1.10265
	1.18394	0.909091
	1.24948	1.03155
	1.24359	1.16867
	1.10889	1.05495
	1.13183	1.20202
	1.13409	1.09665
	1.29323	1.09964
	1.32972	1.22149
	1.08696	1.13545
	1.16381	1.14286
	1.33247	1.26296
	1.15385	1.21042
	1.2354	0.960366
	1.32131	1.26634
	1.5625	1.32468
	1.03571	1.30201
	1.02789	1.21468
	1.29296	1.236
	0.924528	1.05903
	1.25936	1.14697
	1.4915	1.18202
	1.46585	0.963585
	1.12304	0.978142
	1.17996	1.02811
	1.04833	1.22018
	1.20235	1.12541
	1.0114	1.09797
	1.33208	1.12062
	1.40332	1.02254
	1.38033	1.21107
	1.35443	1.36614
	1.08772	1.01646
	1.22359	1.29358
	1.37112	1.29793
	1.2973	0.988722
	1.26634	1.00769
	1.28571	1.15457
	1.28024	1.11528
	1.10782	1.24868
	1.31923	1.39583
	1.28959	1.23754
	1.28287	1.30839
	1.11783	1.16466
	1.31067	1.22944
	1.25697	1.1152
	1.24471	1.2602
	1.24473	1.21811
	1.20384	1.03333
	1.26715	1.20606
	1.13852	1.00369
	1.54079	1.31304
	1.34783	0.996269
	1.21739	1.26345
	1.20423	1.01434
	1.09029	1.16935
	1.1994	1.125
	1.11659	0.877778
	1.33998	1.23494
	1.30691	1.25118
	1.18608	1.14391
	1.19681	1.24038
	1.33898	0.980769
	1.17241	1.24
	1.39735	1.27715
	1.27518	0.940653
	1.23954	0.950515
	1.15441	1.12195
	1.36641	1.26687
	1.07692	1.02273
	1.41336	1.09167
	1.06207	1.24255
	1.4472	1.49825
	1.24682	1.23824
	1.32152	1.15371
	1.20765	1.15672
	1.37609	1.19602
	1.32426	1.30362
	1.22706	1.29108
	1.38739	1.13026
	1.49536	1.23155
	1.14583	1.21429
	1.26508	1.25157
	1.25896	0.92053
	1.25287	1.30328
	1.19933	1.02034
	1.18261	1.02837
	1.06111	1.01579
	1.15203	1.49485
	1.23295	1.06195
	1.31409	1.32625
	1.18115	1.1049
	1.28464	1.17544
	1.01199	1.14409
	1.44538	1.11398
	1.09873	1.31151
	1.07438	1.2997
	1.38723	1.21509
	1.10732	1.00772
	1.1224	1.23792
	1.06344	1.16017
	1.04709	1.1348
	1.37918	0.897163
	0.977221	1.19048
	1.22659	1.23744
	1.40708	1.21028
	1.19136	1.13231
	1.33628	1.0198
	1.27982	1.05846
	1.28213	1.35271
	1.07742	1.287
	1.4728	1.37785
	1.26349	1.20087
	1.17624	1.23967
	1.12261	1.20742
	1.19776	1.35443
	1.11921	1.29259
	1.18231	1.20287
	1.38066	1.29695
	1.27487	0.918675
	1.2268	1.42662
	1.34159	1.03285
	1.1875	1.15775
	1.23429	1.39494
	1.20213	1.25376
	1.29839	1.09218
	1.26559	1.35426
	1.32547	1.26971
	1.1165	1.18256
	1.375	1.27965
	1.12608	0.953846
	1.16932	1.1453
	1.35034	1.2065
	1.12184	1.11896
	1.40816	1.07749
	1.3239	0.966321
	1.18537	1.03716
	1.17353	1.04177
	1.2766	1.04552
	1.21958	1.11615
	1.53779	1.08307
	1.12676	1.19325
	1.34545	1.20853
	1.03497	1.18541
	1.1246	1.28571
	1.21277	1.23442
	1.24569	1.13936
	1.10423	1.11869
	1.3674	1.25816
	1.085	1.22157
	1.13874	1.31963
	1.28066	1.41313
	1.16559	1.37306
	1.14973	1.15044
	1.45547	1.10797
	1.52185	1.2874
	1.22561	1.38846
	1.19056	0.93266
	1.18414	1.43915
	1.26891	1.34211
	1.14175	1.17695
	1.2365	0.940774
	1.33096	1.06857
	1.20222	0.981183
	1.25989	1.14163
	1.20064	1.28692
	1.46088	1.195
	1.25978	1.0819
	1.47628	1.12136
	1.16583	1.14825
	1.17788	1.02661
	1.31471	0.890152
	1.20563	1.20879
	1.21547	1.33673
	1.27864	1.14241
	1.33333	1.20896
	1.23042	1.26158
	1.48812	0.953704
	1.30427	1.26556
	1.33013	0.892265
	1.26923	1.30594
	1.33649	1.18605

## Sheet: Figure2C_Nup58
Name	Nup58_6	Nup58_7	Nup58_8
Median	1.01961	0.937493	1.28401
First Quartile	0.953008	0.855439	1.19149
Third Quartile	1.09109	1.03934	1.34886
Data:	1.19074	0.777778	1.32214
	0.870159	1.0547	1.17791
	0.907674	0.954936	1.24875
	0.951104	0.857422	1.49301
	1.05128	0.822476	1.29464
	0.839612	1.0624	1.28725
	0.875389	0.963007	1.28007
	0.964687	0.950959	1.55028
	1.08438	0.767391	1.14981
	1.09661	1.04793	1.22075
	0.861087	0.898936	1.20954
	0.976136	0.811141	1.54221
	0.889262	0.926852	1.2328
	1.06916	1.06263	1.0431
	1.07006	0.88024	1.27202
	1.0266	1.09854	1.2507
	0.847162	0.843687	1.49937
	0.878322	1.24916	1.29472
	0.836816	0.866087	1.19827
	1.14286	0.839416	1.31841
	1.21237	0.95354	1.19293
	0.939673	0.958237	1.21901
	1.27505	1.1045	1.16699
	0.918425	1.12473	1.28571
	1.01535	0.920207	1.18384
	0.903319	0.879208	0.900222
	0.934307	1.1866	1.31031
	1.03697	0.827901	1.38628
	0.97422	1.05852	1.47317
	0.690702	1.06724	1.34477
	1.09176	0.92707	1.28276
	1.16875	0.909412	1.24671
	1.03019	0.880952	1.16763
	1.03067	0.724609	1.11161
	0.888889	0.935537	1.36684
	0.887805	0.960377	1.24507
	1.28966	0.769524	1.16508
	1.05952	1.08224	1.11523
	0.996637	1.08333	1.20179
	1.10194	0.784091	1.18672
	1.03439	0.869249	0.870588
	1.09231	1.03737	1.35887
	1.21884	0.928429	1.35046
	1.05576	0.941292	1.50596
	1.04156	0.788282	1.14087
	1.00333	0.932127	1.7
	0.959459	0.921569	1.42765
	1.08816	1.11295	1.36653
	1.17932	0.7751	1.399
	1.18969	0.859827	1.43058
	1.19811	0.833554	1.31275
	1.08931	0.807692	1.5287
	1.00225	0.934412	1.20022
	1.11418	1.06292	1.08122
	1.0914	0.873462	1.19124
	1.01825	0.852837	1.37112
	0.865651	0.689747	1.36732
	0.938689	0.895299	1.45554
	0.990396	0.900415	1.32696
	1.04057	1.16632	1.31288
	0.979973	0.875747	1.26238
	1.03805	0.932819	1.30456
	0.987129	0.77972	1.11515
	0.97526	1.30263	1.31867
	1.18093	0.977891	1.36136
	1.35994	0.998955	1.3424
	1.02506	1.03463	1.34459
	1.04321	1.00847	0.949324
	0.821739	0.918203	1.21863
	1.12011	1.12437	0.973228
	1.03894	1.00996	1.46379
	0.963245	0.690058	1.52174
	0.886646	1.00424	1.32058
	0.952462	1.05987	1.25187
	0.913462	0.73852	1.33529
	1.05646	1.04348	1.16746
	1.14023	1.10714	1.40909
	1.10074	1.06414	1.29237
	0.937407	0.838188	1.34085
	0.943253	0.836538	1.26582
	1.06575	0.863568	1.33452
	1.04141	0.990395	1.01411
	1.09015	0.933162	1.14915
	0.867327	0.786863	1.30582
	0.979094	0.916667	1.33596
	1.12224	1.04908	1.15667
	1.05505	0.901639	1.32058
	1.07639	0.592179	1.23653
	1.0194	1.08355	1.1546
	0.996622	0.993348	1.2077
	1.0495	1.05591	1.00358
	1.13134	0.90313	1.41843
	0.899772	0.891304	1.07471
	1.2122	0.971366	1.27542
	1.11008	0.800613	1.14395
	1.01267	0.7625	0.934087
	0.988342	0.847134	1.45661
	1.14327	0.822342	1.29662
	1.04139	0.972358	1.35939
	0.908275	1.06528	1.11747
	1.13973	1.08611	1.41544
	0.867358	0.845316	1.27027
	0.887686	0.986183	1.32966
	1.20798	0.869176	1.22761
	0.87696	0.811723	1.49273
	1.14029	0.691892	1.30653
	1.22981	0.888889	1.16364
	0.997828	0.865535	1.54007
	0.957586	0.903158	1.46875
	0.979079	1.08539	1.33175
	0.962517	1.0562	1.29492
	1.27515	0.835329	1.29245
	0.996005	1.20871	0.885135
	0.944584	0.806517	1.2734
	0.880734	0.955508	1.20806
	1.16258	1.03552	1.11161
	0.998844	1.00885	1.50058
	1.00766	1.02413	1.4
	1.11982	0.8064	1.14719
	1.09649	0.908766	1.53147
	1.06036	1.02346	1.32382
	0.967908	1.06988	1.42516
	1.10673	0.817323	1.26039
	0.968539	1.01327	1.26847
	1.07361	0.881104	1.34095
	1.09548	0.858586	1.28528
	0.864662	0.786184	1.08027
	0.927455	1.0323	1.23165
	1.12598	0.78937	1.38502
	1.03417	1.12517	1.32791
	1.00996	0.991319	1.33676
	1.04844	1.07361	1.47335
	0.969419	1.0394	1.12724
	0.860814	1.08285	1.41434
	1.25778	0.774951	1.29032
	0.961449	0.807018	1.13699
	1.28337	0.827519	1.3584
	1.04866	0.940433	1.2
	0.993902	0.92967	1.23168
	0.894231	0.96063	1.21907
	0.885271	0.925144	1.26974
	0.970043	1.07588	1.27503
	1.04851	0.909639	1.33117
	1.03115	0.951567	1.21706
	0.891791	0.826025	1.3196
	0.84858	0.862857	1.34965
	1.06082	1.01524	1.07385
	1.03399	0.875719	1.34505
	1.06805	1.17361	1.19248
	1.02239	0.976087	1.34098
	0.921893	0.924699	1.29355
	0.992826	1.10127	1.29123
	1.07051	0.968553	1.50196
	0.965976	0.910284	1.27083
	1.08462	1.03711	0.982587
	1.08785	1.02358	1.35306
	1.16063	0.915468	1.30789
	1.16479	0.935484	1.15258
	1.19351	0.989779	1.284
	1.02264	0.8096	1.22591
	0.944853	0.907407	1.1978
	0.985759	0.814925	1.36553
	1.02857	1.12338	1.28842
	1.01956	1.00587	1.14417
	1.08861	1.15466	1.33958
	0.945534	0.937843	1.0701
	0.965812	0.949552	1.1841
	1.11316	0.937143	1.42875
	1.07749	0.841328	1.44809
	0.995305	0.959524	1.46272
	1.07441	0.930723	1.44018
	0.941781	1.13333	1.31201
	0.95279	1.01858	1.41069
	1.06191	0.934817	1.30494
	1.06855	0.826357	1.3156
	1.02999	0.874419	1.33739
	1.20625	0.939971	1.38254
	1.12356	0.921363	1.33034
	1.04558	0.951456	1.30278
	1.08683	0.959596	1.30042
	0.866989	0.86215	1.27459
	0.928659	0.962049	1.32737
	1.05125	0.984581	1.30055
	0.927247	0.716942	1.20971
	1.16241	0.936735	1.25677
	1.03904	0.791762	1.35308
	0.958069	0.831601	1.08706
	1.22679	0.940299	1.32077
	0.983313	1.01288	1.22632
	1.10116	1.32149	1.24747
	1.19136	0.87193	1.25786
	1.11498	1.04979	1.31466
	0.91712	1.02222	1.2722
	1.01085	0.906849	1.2974
	0.90073	0.706557	1.37957
	1.14116	1.1661	1.33247
	1.0322	0.778471	1.13957
	0.851005	0.794436	1.17102
	1.08775	1.01739	1.16194
	1.05298	0.801258	1.22654
	1.05164	1.10526	1.35116
	1.10989	0.744035	1.27273
	1.13019	1.31822	1.18561
	0.762948	0.993534	1.44308
	0.956023	1.0745	1.28401
	1.20761	0.777452	1.06337
	0.84	0.732014	1.29111
	1.06922	0.932018	1.19557
	0.956701	1.07455	1.17021
	0.969586	1.05132	1.06833
	1.00442	0.81363	1.42891
	0.957678	0.964438	1.33765
	1.10349	0.880137	1.16409
	0.9225	0.928747	1.22429
	1.00639	1.03628	1.27867
	1.10149	0.80865	1.19906
	1.06434	1.03917	1.47727
	1.13775	0.772469	1.13158
	0.899225	1.04112	1.37674
	0.987013	1.0655	1.36675
	1.13956	0.861472	1.36681
	1.00499	1.008	1.22164
	1.10851	0.930994	1.4806
	1.01966	1.08129	1.32446
	1.00157	0.861561	1.06667
	0.967447	0.83677	1.18219
	1.20076	1.0343	1.19222
	1.03502	0.799296	1.34366
	0.951708	1.12908	1.17225
	0.853965	1.06583	1.45407
	1.00663	0.831797	1.29293
	0.977912	0.884783	1.59363
	1.25626	1.06791	1.41139
	0.914654	0.978495	1.60557
	0.964516	1.01619	1.33979
	1.13487	1.18942	1.21648
	0.885759	0.894624	1.29215
	1.13603	0.936548	1.1636
	1.10714	0.937916	1.28289
	1.01541	0.904812	1.23153
	0.953662	1.06804	1.27327
	1.02551	1.02289	1.26814
	0.937031	1.04372	1.29005
	1.08931	0.839917	1.05177
	0.934194	0.785106	1.20078
	1.0375	0.758355	1.21658
	0.959064	0.977238	1.40034
	0.878505	0.947771	1.22426
	1.1565	1.08824	1.46535
	1.03909	0.928664	1.04073
	0.986436	1.07376	1.12289
	1	0.828473	1.18147
	1.12431	1.04615	1.12444
	0.942529	1.11058	1.23857
	1.0447	0.957066	1.32247
	0.961616	0.805344	1.22374
	1.031	0.77661	1.4534
	1.08021	1.10304	1.34647
	1.128	1.0075	1.48161
	0.923841	1.01418	1.29453
	0.997872	0.978541	1.1683
	1.00824	1.05237	1.35101
	1.17766	1.04209	1.29118
	0.938398	0.708609	0.932347
	1.05928	0.854871	1.26758
	0.950276	1.00225	1.26099
	1.04288	0.942431	1.06489
	0.940816	1.02007	1.26812
	0.986692	1.01835	1.12663
	0.984639	1.05066	1.1
	1.03011	1.02727	1.26186
	1.10698	1.14594	1.19964
	1.03498	0.953349	1.18636
	0.951526	1.17134	1.40196
	1.24082	0.869505	1.10657
	1.00108	1.15873	1.07363
	0.922741	0.857143	1.14934
	1.01816	0.982178	1.30905
	1.03886	1.08527	1.18509
	0.957292	0.88961	1.30815
	1.08381	1.11468	1.04225
	1.26904	0.766667	1.18605
	1.09225	1.41031	1.12632
	1.11951	0.785203	1.37904
	1.06026	0.858877	1.09282
	0.987041	0.885794	1.25729
	0.914596	0.886329	1.38813
	1.13282	0.820988	1.07617
	0.968801	1.05696	1.5098
	1.01057	1.07386	1.32836
	1.12956	0.806667	1.2576
	0.946007	0.787037	1.4
	0.948315	0.884688	1.23609
	0.95546	0.899329	1.20438
	0.966206	0.962396	1.52526
	1.00745	0.837715	1.30041
	1.01731	0.780083	1.39021
	0.904229	0.906195	1.41245
	0.947516	1.13237	1.3404
	0.912195	0.944751	1.23337

## Sheet: Figure2D_Nup54_494
Name	Nup54_494_5	Nup54_494_6	Nup54_494_7
Median	0.814422	1.06581	2.83057
First Quartile	0.748971	0.985637	2.34388
Third Quartile	0.885813	1.15635	3.22222
Data:	0.757991	1.04695	3.26761
	0.829091	0.875776	2.85714
	0.758523	1.05528	2.11538
	0.801762	1.15287	4.14865
	0.865724	1.06593	2.79866
	0.825613	1.06452	4.42282
	0.8234	1.15897	2.73973
	0.829787	0.994924	2.4569
	0.834146	1.12879	4.34247
	0.814685	0.970588	3.10976
	0.712687	1.16279	3.2
	0.954861	0.895	2.58268
	0.769231	1.1913	2.09346
	0.895197	0.941176	2.21277
	0.809783	1.07798	2.84615
	0.749373	1.08995	2.59006
	0.816092	1.02564	3.41463
	0.814159	0.850932	2.71053
	0.737805	0.907834	3.36667
	0.743056	1.22699	2.24818
	0.96904	1.06452	3.21831
	1.04908	1.18049	3.25
	0.689956	1.29885	2.75
	0.965779	0.920245	3.40741
	0.667665	1.31731	1.94737
	0.725086	1.13171	2.92453
	0.891304	0.994048	2.79433
	0.715116	1.38053	2.26994
	0.753247	0.962963	1.03529
	0.950521	1.0582	2.63448
	0.748718	0.979381	3.22368
	0.87062	1.22099	3.11728
	0.880117	1.05536	3.6747
	0.933962	0.97861	2.09036
	0.807074	0.864407	2.60106
	0.702041	1.01974	2.94565
	0.723982	1.13636	3.72222
	0.741935	1.07801	2.65068
	0.722222	0.971223	2.37313
	0.782334	1.05556	2.80625
	0.810345	1.07692	2.75887
	0.822222	1.04032	1.62143
	0.982143	1.13174	1.76159
	0.721154	0.859903	3.1
	1.23493	0.930481	3.31081
	0.815166	1.28261	2.85906
	0.969512	1.0566	3.26772
	0.861035	1.2454	2.73256
	1.05392	1.06452	1.51136
	0.945378	1.03825	3.65278
	0.832653	1.20652	3.15672
	0.923313	1.0125	2.61818
	0.708333	1.24138	3.18657
	0.81106	1.00699	3.67308
	0.712676	0.813397	3.09412
	0.782222	0.903955	3.24615
	0.739812	0.887446	3.11111
	0.776632	1.20339	3.44094
	0.723602	1.15638	2.17241
	0.78806	1.03623	2.11111
	0.820408	1.12346	3.25333
	0.869318	1.14286	1.98953
	0.796296	0.838284	2.5906
	0.898352	1.27586	1.89524
	1.03896	1.07843	2.74444
	0.919118	0.928205	1.75238
	0.703448	0.985612	3.3354
	0.675799	1.10326	1.57143
	0.751244	1.01899	3.58904
	0.812865	1.22703	2.97419
	0.936027	1.11667	3.20661
	0.753666	1.16783	2.89796
	0.781818	0.781659	3.06857
	0.72	0.943709	2.98649
	0.919283	1.00769	3.43925
	0.780405	1.04348	3.09948
	0.935323	1.14035	1.33679
	0.771987	1.13855	3.21472
	0.780405	1.11462	2.17021
	0.81962	1	4.05155
	0.775801	0.948387	1.60563
	0.694915	1.02128	3.96875
	1.02198	0.974227	2.08333
	0.786585	0.940541	1.74737
	0.925566	0.966507	2.72932
	0.707641	1.2027	2.81081
	0.854938	1.29365	1.98235
	0.920635	1.12575	2.95968
	0.815287	0.826087	2.91057
	0.815498	1.01802	3.1619
	0.902778	1.24378	2.19337
	0.803324	1.12329	2.21687
	0.810897	1.31061	2.5473
	0.784153	1.11304	2.78788
	0.84	0.741176	1.38947
	0.95	0.901042	2.98113
	0.75	1.09836	2.44048
	0.875433	1	1.87121
	0.727941	1.25385	3.08791
	0.888179	1	1.89011
	0.742138	1.01869	3.48438
	0.817259	1.12981	3.45652
	0.751724	1.14599	1.85484
	0.673913	1.22404	2.63946
	0.748837	0.976744	2.74101
	0.780919	0.946341	3.94366
	0.83815	0.95122	3.68966
	0.797945	1.33607	4.34646
	0.764444	0.946939	3.17949
	0.922559	1.14894	2.43165
	0.891892	1	2.59788
	0.745645	1.16571	1.59286
	0.641379	1.03111	1.57143
	0.809816	0.990868	2.52672
	0.962264	0.901345	2.34356
	1	0.919598	2.5871
	0.891525	0.983957	2.34211
	0.864769	1.14451	1.78462
	0.632107	1.16667	2.66216
	0.900485	1.21986	2.19286
	0.931034	1.14118	1.36449
	0.769531	0.858757	2.83333
	0.838428	1.07035	2.46377
	0.872093	1.24211	2.08235
	0.660714	1.05385	2.88172
	0.891566	1.12935	3.35065
	0.775457	0.945652	2.67097
	0.876953	1.04615	1.86275
	0.90604	1.06122	2.74194
	0.85614	1.04688	3.34356
	0.809896	1.07229	2.27174
	0.970149	1.03409	3.40244
	0.84375	1.2234	3.40789
	0.839196	1.09434	4.34177
	0.836257	1	2.82022
	0.85623	1	2.56667
	0.922118	1.10417	2.91765
	0.748387	1.37086	1.47196
	0.77451	1.17829	2.36842
	0.84	1.11675	2.20946
	0.74581	1.01901	2.19598
	0.92381	0.985714	2.85799
	0.740933	1.13615	3.50909
	0.854305	1.2093	4.09655
	0.908571	1.125	1.79114
	0.745318	1.11823	3.03209
	0.813433	1.06569	3.35802
	0.892977	1.26786	2.94118
	0.933526	0.818182	3.23301
	1.18845	1.0274	2.42945
	0.677551	1.03415	2.90995
	0.708235	1.03977	1.61111
	0.768939	1.15385	3.50943
	0.791908	0.94	1.71587
	0.830769	0.96124	1.82051
	0.916409	1.42056	2.3719
	0.916667	1.21667	2.41447
	0.809836	1.04598	3.5
	0.737313	1.01538	2.91573
	0.822785	1.01215	2.93913
	0.72997	0.782748	3.46448
	0.770548	1.05512	3.21693
	0.800995	1.13068	3.41912
	1.12893	1.21138	2.84173
	0.894879	1.10811	4
	0.817647	1.06122	2.77228
	0.699387	0.867725	3.34375
	0.825215	1.06667	2.69231
	0.912892	0.875839	2.59459
	0.760638	1.46099	2.29032
	0.750583	1.14976	2.20769
	0.73743	1.16931	2.88591
	0.64375	1.09155	3.17197
	0.684825	1.2337	2.80822
	0.80083	0.995516	1.65649
	0.843931	1.08824	2.28205
	0.93913	0.925466	1.90323
	1.04025	1.06015	2.34911
	0.698795	1.2037	3.09346
	0.834437	0.915	3.13274
	0.685345	0.867403	3
	0.74359	1.07207	3.64103
	0.808571	0.942446	3.2449
	0.77381	1.15135	3.44318
	0.746622	1.03891	1.82558
	0.731061	1.00971	3.09
	0.721569	1.2087	3.61582
	0.969828	1.22759	3.29747
	0.898017	1.345	1.5
	0.906883	0.965909	1.74545
	0.826715	1.05525	2.68548
	0.634409	1.19162	2.50725
	0.819876	1.03804	2.82781
	0.798165	1.08547	3.5241
	0.877598	1.18293	1.92857
	0.869565	0.911111	2.52174
	0.77377	0.886364	3.09524
	0.608997	1.07317	3.04167
	0.763485	1	2.03676
	0.848185	0.913242	3.22581
	0.761155	0.892216	2.46667
	0.835366	1.04484	2.94595
	0.977273	1.07328	2.7
	1.02486	1.23276	2.93443
	0.782143	1.23333	3.44615
	0.831325	1.1761	3.7
	0.92735	0.896774	1.76667
	0.837278	1.15625	2.38071
	0.770751	0.872146	4.39326
	0.693151	1.00881	2.04575
	1.06977	1.10329	2.58261
	0.694737	1.02212	2.9593
	0.848315	1.10256	2.94574
	0.722561	1.19192	1.51471
	0.739286	1.12255	2.40116
	0.941053	1.41346	2.58716
	0.718519	0.948498	2.91975
	0.833766	1.16026	1.77005
	0.802469	0.964286	1.73653
	0.672474	1.18293	4.17886
	0.690196	1.09774	3.13529
	0.825806	1.02793	3.87586
	0.747525	1.09585	2.66379
	0.686391	1.29545	2.52326
	0.832061	1.16578	2.34483
	0.758007	0.863905	3.1049
	0.718023	1.20571	3.38012
	0.946188	1.0724	2.51402
	0.858044	1.05528	2.96491
	0.943299	1.17037	2.03279
	0.889908	0.987952	3.085
	0.919881	1.0452	2.59589
	0.747748	1.19255	2.92466
	0.764384	0.947368	2.77487
	0.851064	1.09778	3.22353
	0.823529	1.09942	1.59259
	0.792642	1.07955	2.13445
	0.833333	1.28796	3.20567
	0.774892	1.17703	2.50746
	0.711974	0.990476	2.73077
	0.932271	1.1098	3.5092
	0.928571	1.23846	3.8
	1.07715	1.14451	3.55944
	0.813056	0.938095	3.12987
	0.890805	1.05217	3.08247
	0.771562	1.01299	1.18232
	0.832512	1.09143	1.51053
	1.10542	1.02051	2.0303
	0.801394	0.96732	3.58824
	0.856287	1.00503	2.90323
	0.784753	1.22414	2.45304
	0.762931	1.06771	3.49524
	0.848837	0.968912	3.02924
	0.819149	1.16402	2.74419
	0.769784	0.983871	2
	0.859459	1.09483	2.6015
	0.746914	0.911458	3.10526
	0.731183	1.22346	3.35052
	0.762626	1.15441	3.4375
	0.692308	1.12069	2.65217
	0.927273	1.03205	2.41549
	0.77027	1.16049	2.70323
	0.766404	1.15108	3.4026
	0.821306	1.29907	2.95732
	0.723647	1.06154	2.92683
	0.834356	0.903226	2.28455
	0.851852	1.22798	1.61481
	0.63981	1.11	3.38182
	0.745033	1.18699	3.64762
	0.886364	1.05389	3.70455
	0.746356	1.1444	2.69032
	0.816479	1.20161	2.97403
	0.628458	0.968421	4.15455
	0.957447	0.969388	2.13699
	0.859031	0.974747	3.12403
	0.921466	0.910798	2.70677
	0.854067	1.09184	2.26923
	1.01604	1.03012	2.98837
	0.8	1.06311	2.95946
	0.832536	1.09836	2.62048
	0.644809	1.28235	2.25
	0.935275	1.10383	2.675
	0.884161	1.34328	2.9902
	0.612782	1.00571	3.05556
	0.923077	0.845238	3.13174
	0.827338	1.13605	3.31875
	0.723214	0.935484	3.30688
	0.78125	1.2233	2.5974
	0.881081	0.842105	2.11594
	0.790875	1.19469	2.90909
	0.781065	1.1462	3.14118
	0.835088	0.888889	2.78302
	0.803077	0.981308	3.17791
	0.697674	1.30435	3.96914
	0.756014	1.11972	3.12397
	0.71618	0.982063	2.48214
	0.906417	1.00725	3.7125
	1.02674	1.23871	1.75882
	0.841085	1.03289	3.54135
	0.853261	1.0942	3.89552

## Sheet: Figure2E_Nup54_510
Name	Nup54_510_5	Nup54_510_6	Nup54_510_7
Median	1.06472	1.06022	1.03776
First Quartile	0.993782	0.994547	0.959603
Third Quartile	1.15106	1.13446	1.12569
Data:	1.09848	1.23013	0.975385
	1.0583	0.960177	1.16605
	0.995037	1.01087	1.05556
	1.0355	0.899563	1.09322
	1.02756	1.29583	1.1014
	0.950893	1.15311	1.23219
	0.803333	0.949367	0.796875
	1.07576	0.953668	0.965
	1.05802	0.974603	1.38492
	1.16071	0.966667	1.24251
	1.0472	1.14468	1.0118
	0.96679	1.02574	1.10736
	1	1.06494	1.08812
	1.44706	0.982394	1.14286
	1.18015	1.0641	0.986971
	0.897872	1.11688	1.10037
	1.12727	1.2328	1.11698
	0.897727	0.934156	1.14887
	0.838028	0.970213	1.1498
	1.0709	1.09091	1.0369
	0.990521	0.918919	1.17714
	0.95664	0.763441	0.803279
	1.2428	1.06835	0.873362
	1.06466	1	1.12157
	0.97	0.924779	0.861702
	1.22596	1.06478	1.04717
	1.07468	1.16384	1.14433
	1.02013	0.727273	1.06667
	0.990783	1.35366	1.04196
	0.945289	1.10236	1.0813
	1.19847	1.00784	0.958716
	0.957237	1.09302	0.986595
	1.11273	1.1224	1.08777
	0.948	1.13084	0.965517
	1.07566	0.846698	1.10386
	1.03211	0.992647	1.42384
	1.42211	1.04739	1.03659
	0.932515	1.04204	1.14715
	1.08966	0.912409	1.07872
	0.921397	0.961977	1.2093
	0.995495	1.14793	1.00442
	0.995261	1.27344	1.24022
	0.897751	1.26316	1.03125
	1.28205	1.09649	1.15342
	1.18085	1.345	0.827715
	1.14747	1.04215	1.12567
	0.976608	1.02542	1.09539
	1.06544	1.11944	0.952218
	1.04068	1.00858	0.765273
	1.03734	0.991525	1.39098
	0.841772	1.15217	0.923588
	0.995495	1.14521	0.963077
	1.10508	0.980469	0.909605
	1.02206	1.0535	0.937876
	1.03977	1.06549	1.06477
	1.16614	1.06693	0.940767
	0.825939	0.867257	1.07073
	0.95625	0.983333	0.860558
	1.19369	1.05381	0.9
	1.00738	0.902965	0.979339
	1.3114	1.03321	1.07438
	1.40654	0.974249	1.16287
	1.04748	0.992424	1.06553
	0.931193	0.878327	1.22295
	1.00966	1.05983	0.993939
	1.21963	1.15035	0.971154
	0.92823	1.10859	1.00467
	1.00851	0.867925	1.06024
	1.07474	0.943182	0.965602
	0.986364	1.13782	1.12069
	1.11355	1.12613	1.22059
	1.03883	0.876847	1.14097
	1.04326	0.985955	1.05469
	1.08152	1.10156	0.979058
	1.15044	1.14228	1.20798
	1.12629	0.901639	1.08684
	1.1448	1.10753	0.943396
	0.986842	1.15447	0.954167
	1	1.0855	1.09132
	1.03953	0.936508	1.15591
	1.11429	1.04887	1.25658
	0.957944	1.21223	1.05484
	1.0828	1.03365	1.08284
	0.996785	1.05291	0.949519
	1.23445	1	0.953216
	1.08282	0.92887	1.22857
	1.04592	0.969543	1.04785
	0.97619	1.01333	1.11064
	0.954861	1.02256	1.34483
	0.979253	1.03901	0.979339
	1.02475	1.0241	1.0407
	1.15271	0.996644	1.28966
	0.959877	1.213	0.854093
	1.04808	1.01521	1.12579
	1.00714	1.09798	0.90708
	1.32794	1.05691	1.02174
	1.19433	0.952077	1.2862
	1.25	1.132	1.12037
	1.08416	1.14246	1.14488
	1.12876	1.06103	1.08284
	1.10612	1.19544	0.993548
	1.09174	0.97929	0.854077
	1.34397	1.11871	0.846154
	1.15884	1.20225	1.02446
	0.855305	0.916968	1.1227
	1.22689	1.14027	0.996241
	0.787234	1.05181	0.92328
	1.11702	1.11976	0.803371
	1.21811	1.06311	1
	1.05329	1.15789	1.17434
	1.20305	1.30638	0.89557
	1.15126	1.27556	0.886463
	1.06881	1.06271	1.10857
	0.89899	1.04103	0.879828
	1.03463	1.20259	1.22992
	0.971831	1.15487	1.15434
	1.25591	1.03125	0.966967
	1.14651	0.996269	0.974249
	1.12376	1.20755	1.1086
	1.01878	1.01929	0.948529
	0.961538	1.15497	1.03302
	1.24017	0.968421	0.937716
	0.995169	1.20319	0.862876
	1.03226	1.04294	0.821918
	1.28727	1.0317	1.24255
	1.31401	1.26829	0.951389
	1.15827	1.12734	1.14286
	1.03093	1.13707	1.01587
	1.26068	1.10985	1.00441
	0.94052	0.929825	0.991903
	1.08521	1.00424	1.03436
	0.993711	0.868852	1.10817
	1.08163	1.05405	1.24747
	1.16346	1.116	1.02532
	1.31905	0.919003	0.916479
	1.12308	1.06612	0.9
	1.1058	1.04098	1.14337
	1.00612	1.29183	1.19114
	0.963235	1.05817	1.14646
	1.1	1.08876	1.22346
	1.07222	1.10084	1.00658
	1.24138	1.05078	1.09881
	0.977528	1.16807	0.996377
	0.89916	1.02927	1.00249
	0.75	0.888889	1.17632
	1.09003	1.00772	0.868778
	0.941176	1.09195	1.04511
	0.942731	1.31364	1.1433
	1.09016	1.1617	1.00633
	1.15512	1.15419	1.23028
	1.19243	1.06573	0.962441
	0.953668	0.951049	0.991525
	1.07265	1.01042	0.873077
	1.20896	1.21457	0.886207
	1.04412	0.862676	0.908425
	0.965649	1.15678	0.940639
	1.06478	1.20085	0.991266
	0.912568	1.1234	1.21753
	1.04808	1.2	1.04225
	1.14907	1.15347	1.02357
	1.24227	1.21645	0.973154
	1.14865	1.07547	0.962264
	1.04762	1.07143	1.14502
	1.19064	0.979253	0.862385
	1.02694	0.895288	1.15209
	1.19608	0.804545	1.25561
	1.05976	0.97193	1.06498
	1.00664	1.03665	1.01894
	1.01348	1.03137	1.19792
	1.03614	1.0598	0.971989
	1.06019	1.13333	0.902098
	1.14337	1.06873	0.99026
	1.17241	1.41016	1.06485
	1.12446	1.08865	1.13534
	1.18557	1.40984	0.982979
	1.06667	1.12236	0.930748
	1.06341	1.18333	1.05418
	1.23707	1.06516	1.09091
	1.07438	1.10853	1.01524
	1.00307	0.87963	1.08499
	1.08889	1.05063	1.10744
	1.05051	0.980545	0.903743
	1.23148	1.15986	0.744745
	1.21017	1.02632	1.23381
	1.08651	1.04255	1.02105
	1.0411	1.03731	1.10373
	1.17105	1.07435	0.923858
	1.04408	1.2378	1.19463
	1.08686	0.984962	0.968421
	1.13776	1.08917	1.00369
	1.17051	1.0531	0.890566
	1.11045	1.08081	1.00658
	1.27273	0.906716	1.11719
	1.2037	1.07442	1.27559
	1.02257	1.06481	1.34677
	0.966102	1.0113	1.19403
	0.972477	1.00904	1.03861
	1.16878	0.973054	1.02333
	0.938776	0.995798	1.03422
	0.942559	1.03968	0.932927
	1.13393	1.05096	1.02339
	1.15686	1.06419	1.06364
	1	0.994764	1.06406
	1.19925	1.22018	1.14938
	1.17617	1.20732	1.02073
	1.08978	0.923588	1.07302
	1.07798	1.02459	0.950658
	1.15638	1.1461	1.03043
	1.03817	1.13483	1.16438
	1.05123	1.04615	1.12303
	1.25431	1.20225	0.864706
	0.935252	1.11538	1.0137
	1.07377	1.06061	1.0932
	1.3018	0.994475	1.00435
	1.10092	1.1157	1.17949
	1.104	1.16444	1.16043
	0.991304	0.745318	1.03135
	1.18182	0.940426	1.12042
	1.03614	0.98995	1.04297
	1.10985	1.09901	1.11881
	0.905512	1.18797	0.881633
	1.05137	0.980769	0.94898
	0.941489	0.966292	1.09129
	1.34783	1.0819	1.28972
	1.16667	1.22581	0.989583
	0.95935	0.926108	0.930295
	1.11809	1.23592	1.34466
	1.07261	1.00862	1.01923
	1.14458	1.08541	1.02518
	1.25	1.0058	0.916667
	1.03846	1.2125	1.1875
	1.02051	1.1084	1.14907
	0.95	1.09486	1.07692
	1	1.03042	0.945392
	0.940789	1.10407	0.975945
	0.968442	1.04124	1.19101
	1.04132	1.01316	1.08213
	0.932039	1.09251	0.990291
	1.28626	1.11823	0.95283
	1.23451	1.13587	1.10246
	1.03109	1.11441	1.05363
	1.40088	0.911263	1.1257
	1.31034	0.917683	1.28788
	0.75	1.13021	0.995575
	1.07609	1.14346	1.13313
	1.13352	1.21519	1.11168
	1.26415	1.06504	1.06278
	0.899543	0.995984	1.14426
	0.993994	1.03676	0.908163
	0.929688	1.08846	1.05579
	1.02404	1.04911	0.982278
	1.02469	1.05556	1.15432
	1.06996	1.06278	0.951327
	1.08649	0.958333	1.25926
	1.1214	1.23053	0.872146
	0.906404	1.14815	1.04747
	0.947059	1.14334	0.805128
	1.01515	1.10949	0.977597
	0.929032	1.12853	1.01845
	0.947917	1.12863	1.13939
	1.12044	0.914729	1.17839
	1.09545	1.00353	1.09843
	1.16309	1.17595	0.83682
	1.01773	1.10821	1.11437
	1.11915	0.972973	0.935484
	0.939922	1.07018	1.03051
	1.09898	0.990698	1.03867
	1	1.1831	0.92926
	1	1.01717	1.13636
	1.26349	1.16878	0.82716
	0.944882	0.94902	0.83758
	1.00709	1.17671	1.12881
	1.12635	1.05907	1.12755
	1.15596	1.01478	0.990033
	0.878788	0.969543	0.973064
	1.03965	1.04065	1.086
	0.888889	1.05376	1.08852
	1.23325	1.00939	1.14554
	0.991736	1.11053	1.31193
	1.29956	0.915129	1.23755
	1.15658	1.02427	1
	0.917857	0.975904	1.12251
	0.985075	0.947236	0.909091
	1.22684	0.893536	0.904762
	1.09417	0.944904	0.978022
	1.23673	1.04693	0.943522
	1.00985	1.06169	0.839416
	1.23585	1.03115	0.928177
	1.11209	1.29412	1.08815
	0.983923	1.1	1.0884
	1.11765	0.966057	1
	1.13397	1.07469	0.938144
	1.00966	1.25517	0.97
	1.00694	1.17021	1.05995
	1.09623	1.22509	0.909357
	1.14706	1.1014	0.886792
	1.03316	1	0.867347
	0.942308	1.14246	1.00535
	0.953571	0.909434	0.903797
	1.18333	1.16578	0.833333
