# Supplementary material for: Conformation of the nuclear pore in living cells is modulated by transport state
Source: eLife. 2020 Dec 21;9:e60654. doi: 10.7554/eLife.60654 (PMC7752133; doi:10.7554/eLife.60654)
Supplement: Figure 3—figure supplement 1—source data 1. [file elife-60654-fig3-figsupp1-data1.xlsx]

## Sheet: Fig 3--Fig S CD Control Cells
Frame Number	Cell 1 N/C Intensity	Cell 2 N/C Intensity	Cell 3 N/C Intensity	Cell 4 N/C Intensity	Cell 5 N/C Intensity	Cell 6 N/C Intensity		Mean N:C Ratio	Standard Error N:C Ratio
1	0.8403	0.926493	0.762145	0.547082	0.6869	0.75759		0.753418	0.0531025
2	0.841024	0.925196	0.756909	0.545687	0.682375	0.755648		0.75114	0.0533441
3	0.842344	0.927771	0.756087	0.542993	0.687544	0.754431		0.751862	0.0538265
4	0.843754	0.929169	0.757746	0.541666	0.685798	0.754198		0.752055	0.0543042
5	0.843699	0.928788	0.752479	0.539443	0.683842	0.758903		0.751192	0.0546299
6	0.850807	0.921267	0.75555	0.533109	0.680903	0.762101		0.750623	0.0552224
7	0.851086	0.926365	0.756167	0.537107	0.678615	0.763349		0.752115	0.0553569
8	0.84913	1.01802	0.807215	0.539314	0.674033	0.758262		0.774329	0.0662349
9	0.965125	1.09946	0.851089	0.587737	0.715019	0.810539		0.838161	0.0737568
10	1.06611	1.17562	0.894801	0.637716	0.756318	0.857771		0.898057	0.0805784
11	1.16894	1.24786	0.938308	0.682224	0.795065	0.910809		0.9572	0.0882651
12	1.2643	1.31091	0.975759	0.724621	0.826556	0.94259		1.00746	0.0959144
13	1.33411	1.36868	1.01388	0.761038	0.85967	0.982418		1.0533	0.101293
14	1.40865	1.41538	1.04651	0.795893	0.891576	1.01429		1.09538	0.106573
15	1.47396	1.46386	1.08243	0.831603	0.923964	1.05338		1.1382	0.110904
16	1.52656	1.50854	1.11237	0.861938	0.952322	1.09015		1.17531	0.114536
17	1.58127	1.52955	1.15109	0.887738	0.981166	1.11639		1.20787	0.116672
18	1.62276	1.55837	1.17205	0.913552	1.00509	1.14595		1.2363	0.118744
19	1.65895	1.57868	1.18758	0.929748	1.03032	1.1676		1.25881	0.120598
20	1.69954	1.60559	1.21611	0.955467	1.04971	1.18601		1.2854	0.122898
21	1.72215	1.62541	1.23434	0.976697	1.06255	1.20501		1.30436	0.12359
22	1.75174	1.65796	1.25265	0.993987	1.08022	1.22296		1.32659	0.126239
23	1.77814	1.66763	1.26855	1.01467	1.094	1.23966		1.34378	0.126589
24	1.80687	1.67345	1.28659	1.03644	1.10815	1.25769		1.36153	0.126742
25	1.82666	1.69611	1.30326	1.04921	1.12083	1.27566		1.37862	0.128165
26	1.84966	1.72113	1.31805	1.07408	1.13366	1.2884		1.3975	0.129307
27	1.86435	1.74214	1.32835	1.08853	1.144	1.3011		1.41141	0.130302
28	1.88302	1.75329	1.34439	1.09987	1.15568	1.31375		1.425	0.130981
29	1.88679	1.76696	1.36037	1.11329	1.17149	1.32662		1.43759	0.129683
30	1.91058	1.76499	1.36756	1.12868	1.17831	1.33499		1.44752	0.13018
31	1.92928	1.77293	1.36951	1.12775	1.18959	1.35151		1.45676	0.131853
32	1.95525	1.77959	1.3755	1.13537	1.2006	1.363		1.46822	0.133694
33	1.95102	1.79365	1.38229	1.14755	1.21675	1.37305		1.47738	0.131783
34	1.97656	1.79939	1.38567	1.14917	1.22893	1.38465		1.48739	0.134007
35	1.9883	1.80441	1.38948	1.15179	1.23628	1.3989		1.49486	0.134683
36	2.00066	1.80405	1.40166	1.15945	1.24419	1.40102		1.50184	0.134656
37	2.00964	1.81355	1.40674	1.17089	1.24986	1.41215		1.51047	0.134746
38	2.01216	1.81698	1.40986	1.1745	1.25094	1.42428		1.51479	0.134575
39	2.03123	1.82797	1.40795	1.18538	1.26162	1.42872		1.52381	0.136104
40	2.03043	1.83068	1.40614	1.20158	1.26736	1.42664		1.52714	0.134618
41	2.03845	1.83212	1.41897	1.20892	1.27641	1.4421		1.53616	0.133794
42	2.0502	1.82891	1.42582	1.21989	1.29032	1.45004		1.5442	0.132867
43	2.06144	1.84186	1.4243	1.22888	1.29279	1.46559		1.55248	0.13403
44	2.0619	1.83938	1.43164	1.23423	1.29677	1.46703		1.55516	0.13296
45	2.07232	1.83121	1.44473	1.23898	1.30547	1.46384		1.55942	0.132463
46	2.08657	1.84103	1.44087	1.24979	1.31114	1.45762		1.56451	0.134036
47	2.09843	1.825	1.44394	1.24563	1.30919	1.45764		1.5633	0.134877
48	2.11047	1.76008	1.41286	1.23765	1.30924	1.45304		1.54722	0.134406
49	2.03043	1.67382	1.36595	1.18712	1.27407	1.41921		1.49177	0.127096
50	1.91049	1.59372	1.3212	1.13093	1.22467	1.36983		1.42514	0.116131
51	1.79721	1.53065	1.27355	1.07036	1.17211	1.31961		1.36058	0.107791
52	1.68815	1.46374	1.23314	1.0165	1.12221	1.27156		1.29921	0.0991181
53	1.59134	1.40945	1.19306	0.96506	1.07886	1.22105		1.24314	0.0924152
54	1.50172	1.35352	1.16972	0.92395	1.04663	1.18366		1.19653	0.084743
55	1.43965	1.31225	1.1388	0.883893	1.01945	1.15223		1.15771	0.0812101
56	1.37774	1.27647	1.11099	0.848454	0.992629	1.1178		1.12068	0.0776652
57	1.32343	1.24774	1.07982	0.821866	0.96864	1.09192		1.0889	0.0744079
58	1.27353	1.21896	1.0592	0.799058	0.943646	1.07374		1.06136	0.0713371
59	1.2396	1.20111	1.03364	0.781012	0.922567	1.04826		1.0377	0.0699374
60	1.21124	1.17307	1.02154	0.763356	0.904903	1.03231		1.01774	0.0681274
61	1.18142	1.15757	1.00875	0.746982	0.884272	1.00303		0.997005	0.0671282
62	1.16417	1.14384	0.992563	0.736242	0.867971	0.990781		0.982596	0.0665748
63	1.13778	1.13395	0.981111	0.720094	0.857836	0.97397		0.967455	0.0658688
64	1.12329	1.11646	0.968632	0.711835	0.849835	0.956605		0.954443	0.0644894
65	1.10811	1.09732	0.960756	0.699706	0.839492	0.950307		0.942615	0.0636002
66	1.09723	1.09422	0.949401	0.694561	0.830347	0.945285		0.935175	0.0634425
67	1.08282	1.08256	0.943054	0.688201	0.818486	0.936604		0.925288	0.0626135
68	1.07462	1.07747	0.930979	0.684325	0.812569	0.932744		0.918783	0.0621989
69	1.07314	1.06505	0.922383	0.676389	0.803737	0.922565		0.910544	0.0624048
70	1.06469	1.07301	0.914568	0.670516	0.795705	0.916105		0.905765	0.0634734
71	1.06241	1.07389	0.914788	0.665614	0.792522	0.911427		0.903442	0.0641306
72	1.04673	1.07139	0.904966	0.658649	0.787458	0.903062		0.895377	0.063699
73	1.04191	1.07289	0.898668	0.654191	0.78133	0.900796		0.89163	0.0643206
74	1.04519	1.0716	0.895998	0.648816	0.773042	0.89719		0.888638	0.0655708
75	1.04778	1.06837	0.888865	0.642708	0.766897	0.888334		0.883825	0.0665313
76	1.04711	1.06024	0.885958	0.640158	0.765097	0.892141		0.881785	0.0661573
77	1.03627	1.05587	0.877972	0.635973	0.764918	0.886464		0.876244	0.065346
78	1.03122	1.04491	0.872682	0.627499	0.763681	0.886941		0.871155	0.0650591
79	1.03059	1.04446	0.867116	0.625321	0.763765	0.886374		0.869604	0.0652311
80	1.02529	1.04467	0.865185	0.62842	0.761317	0.88544		0.868387	0.0645608
81	1.02268	1.03519	0.858892	0.627944	0.760356	0.879667		0.864121	0.0635662
82	1.01776	1.02926	0.854568	0.629151	0.757057	0.874871		0.860445	0.0626302
83	1.01429	1.02856	0.856168	0.631326	0.76046	0.870694		0.86025	0.0617919
84	1.01439	1.03177	0.856326	0.629331	0.755792	0.872887		0.860083	0.0626068
85	1.00973	1.02897	0.86027	0.625853	0.751992	0.884724		0.860257	0.0627354
86	1.00775	1.03238	0.865072	0.62762	0.751223	0.876051		0.860016	0.0626263
87	1.00832	1.02524	0.855527	0.625694	0.752516	0.880352		0.85794	0.0622259
88	0.999981	1.03316	0.853471	0.628242	0.749472	0.881151		0.85758	0.0621727
89	0.994911	1.02544	0.851952	0.624696	0.751061	0.883069		0.855189	0.0614456
90	0.995465	1.02445	0.853164	0.617869	0.754831	0.884255		0.855005	0.0620663
91	0.993024	1.02834	0.853387	0.619453	0.758093	0.885855		0.856359	0.0618908
92	0.986489	1.02185	0.845486	0.622863	0.754461	0.880992		0.852023	0.0605077

## Sheet: Fig 3--Fig S CD Starved Cells
Frame Number	Cell 1 N/C Intensity	Cell 2 N/C Intensity	Cell 3 N/C Intensity	Cell 4 N/C Intensity	Cell 5 N/C Intensity	Cell 6 N/C Intensity		Mean N:C Ratio	Standard Error N:C Ratio
1	0.509413	0.610933	0.761	0.442723	0.522766	0.633223		0.58001	0.046063
2	0.511	0.607778	0.776982	0.433092	0.526627	0.629338		0.580803	0.0487153
3	0.51402	0.614596	0.780982	0.432361	0.528855	0.621945		0.582127	0.0490202
4	0.515184	0.62802	0.774111	0.438031	0.528884	0.618872		0.58385	0.047741
5	0.514305	0.625632	0.788418	0.436647	0.518308	0.617358		0.583445	0.0501719
6	0.518381	0.622705	0.785797	0.436239	0.5297	0.614634		0.584576	0.0490728
7	0.521899	0.611753	0.791592	0.428167	0.534479	0.618437		0.584388	0.0502137
8	0.518179	0.60939	0.792124	0.430225	0.525508	0.612294		0.581287	0.050371
9	0.572628	0.652819	0.82928	0.471326	0.585883	0.635602		0.62459	0.0484783
10	0.624728	0.692014	0.85899	0.50093	0.63429	0.656348		0.661217	0.0475517
11	0.67063	0.725206	0.882167	0.525688	0.680996	0.670996		0.692614	0.0468838
12	0.690743	0.754006	0.901297	0.555697	0.716958	0.692402		0.718517	0.0456925
13	0.71453	0.778161	0.932306	0.579069	0.748661	0.70765		0.743396	0.0469175
14	0.740147	0.800552	0.950127	0.606176	0.786806	0.722143		0.767659	0.0460611
15	0.755583	0.820696	0.972328	0.624801	0.824732	0.737103		0.789207	0.0471387
16	0.770556	0.839531	1.00007	0.643018	0.846167	0.750429		0.808296	0.0487435
17	0.776924	0.857584	1.02426	0.662417	0.8692	0.765605		0.825998	0.0499954
18	0.792453	0.875332	1.05146	0.676421	0.895508	0.780881		0.845342	0.0520857
19	0.807485	0.891459	1.0681	0.69453	0.910413	0.784548		0.859422	0.052493
20	0.81371	0.909023	1.08038	0.709912	0.944819	0.787942		0.874297	0.0537894
21	0.815316	0.920781	1.11133	0.720425	0.947997	0.801179		0.886172	0.0564012
22	0.829038	0.92468	1.11515	0.74077	0.960616	0.81208		0.897055	0.0543568
23	0.831918	0.942361	1.14595	0.758126	0.978096	0.820402		0.912808	0.0572996
24	0.84244	0.952798	1.1504	0.779685	0.991496	0.829545		0.924395	0.0556907
25	0.842467	0.966522	1.15586	0.78874	0.998778	0.835973		0.93139	0.0558339
26	0.845299	0.971407	1.18547	0.785416	1.01074	0.842092		0.94007	0.0601929
27	0.851301	0.975421	1.18173	0.802374	1.01856	0.84785		0.946204	0.0580017
28	0.864968	0.984388	1.21099	0.803493	1.02816	0.854186		0.957698	0.0613538
29	0.862183	0.990282	1.20734	0.814968	1.03507	0.857148		0.961166	0.0602501
30	0.867949	1.00139	1.22448	0.828953	1.04954	0.868597		0.973485	0.0612612
31	0.871479	1.00017	1.22621	0.827351	1.05516	0.869438		0.974966	0.0615962
32	0.88213	1.007	1.23206	0.8262	1.06701	0.87824		0.982107	0.0620205
33	0.887996	1.00874	1.24619	0.845525	1.07138	0.884342		0.990695	0.0619261
34	0.900997	1.01247	1.24896	0.855067	1.07643	0.884618		0.996423	0.0611067
35	0.906508	1.01049	1.26538	0.852247	1.07914	0.888967		1.00045	0.0631659
36	0.911789	1.01422	1.25437	0.86429	1.09217	0.891699		1.00476	0.0608804
37	0.912138	1.02076	1.26308	0.86392	1.09611	0.89587		1.00865	0.0620518
38	0.924316	1.02186	1.26041	0.862877	1.09868	0.898601		1.01112	0.0611281
39	0.927581	1.02567	1.28048	0.879809	1.10155	0.904589		1.01995	0.0621955
40	0.935927	1.02903	1.28158	0.883692	1.10689	0.903356		1.02341	0.0619788
41	0.930684	1.02749	1.2775	0.881054	1.10793	0.906399		1.02184	0.0617153
42	0.934498	1.0319	1.28746	0.897345	1.11174	0.907824		1.02846	0.0618061
43	0.938066	1.03751	1.28213	0.901787	1.11554	0.911383		1.03107	0.0605248
44	0.934491	1.03366	1.29109	0.911095	1.1206	0.916561		1.03458	0.0612086
45	0.939047	1.03347	1.27789	0.904921	1.11999	0.918464		1.0323	0.0594096
46	0.9355	1.04165	1.28078	0.898565	1.12402	0.917606		1.03302	0.0607305
47	0.93881	1.04584	1.2737	0.892179	1.13213	0.922853		1.03425	0.0602093
48	0.93216	1.03378	1.26895	0.87801	1.11644	0.920363		1.02495	0.0603109
49	0.862248	1.00172	1.25571	0.837922	1.0479	0.907498		0.9855	0.0633052
50	0.804519	0.971652	1.22788	0.791495	0.988464	0.89364		0.946276	0.0654598
51	0.767747	0.936089	1.2021	0.726584	0.936164	0.883566		0.908709	0.0686185
52	0.72952	0.90861	1.17499	0.68783	0.888682	0.871393		0.876837	0.0701184
53	0.700326	0.884241	1.15698	0.651367	0.859784	0.866882		0.853264	0.0724762
54	0.682156	0.860227	1.13719	0.634037	0.81777	0.858413		0.831633	0.0722222
55	0.669264	0.845756	1.12055	0.596867	0.786545	0.853709		0.812115	0.0742491
56	0.662892	0.836098	1.10722	0.572464	0.763299	0.844865		0.797807	0.0751864
57	0.656299	0.823103	1.08242	0.568069	0.745025	0.837411		0.785388	0.0725432
58	0.649289	0.807929	1.0883	0.556324	0.730897	0.832699		0.777573	0.0748552
59	0.646397	0.80417	1.06538	0.537955	0.718022	0.824656		0.766097	0.0737425
60	0.639391	0.791153	1.04669	0.528196	0.70496	0.820426		0.755137	0.0725678
61	0.644548	0.783527	1.04033	0.510521	0.694628	0.816952		0.748418	0.0733535
62	0.640724	0.784823	1.02149	0.503485	0.686825	0.814448		0.741966	0.0719698
63	0.647887	0.782994	1.00908	0.510621	0.679845	0.807845		0.739713	0.0691799
64	0.637702	0.779785	1.00084	0.495531	0.68081	0.803627		0.73305	0.0700271
65	0.631524	0.775065	1.00026	0.490631	0.674186	0.801598		0.728877	0.0707816
66	0.63073	0.782076	0.981962	0.487437	0.675723	0.79977		0.726283	0.068949
67	0.61982	0.769154	0.986699	0.491433	0.669137	0.795988		0.722038	0.0693204
68	0.614819	0.769023	0.975793	0.480459	0.657111	0.792241		0.714908	0.0695928
69	0.611872	0.772637	0.962703	0.479096	0.659215	0.792566		0.713015	0.0683299
70	0.617022	0.76938	0.958465	0.482256	0.650121	0.788944		0.711031	0.067227
71	0.620385	0.772969	0.938328	0.484512	0.653339	0.789466		0.709833	0.0644204
72	0.617663	0.766494	0.935806	0.474095	0.660879	0.79145		0.707731	0.0651597
73	0.62002	0.771001	0.931108	0.472685	0.654415	0.7901		0.706555	0.0649253
74	0.613521	0.774	0.925108	0.476211	0.650397	0.790984		0.705037	0.0643678
75	0.615815	0.774034	0.909366	0.464242	0.654152	0.791106		0.701452	0.063868
76	0.626076	0.772087	0.883742	0.468307	0.656451	0.791181		0.699641	0.0600871
77	0.6127	0.77213	0.884577	0.463336	0.64912	0.792038		0.69565	0.0616033
78	0.618258	0.777042	0.875204	0.461583	0.653153	0.791021		0.696043	0.060702
79	0.619057	0.778003	0.866022	0.469113	0.658223	0.794094		0.697419	0.0588975
80	0.603945	0.776717	0.867738	0.453404	0.656071	0.792777		0.691775	0.0616952
81	0.600107	0.778722	0.864278	0.460411	0.660163	0.792298		0.692663	0.060649
82	0.597195	0.778908	0.870262	0.461825	0.663882	0.789942		0.693669	0.0610097
83	0.597631	0.781157	0.869822	0.456387	0.663668	0.795748		0.694069	0.0620563
84	0.592181	0.778905	0.872607	0.455746	0.669361	0.792602		0.693567	0.062335
85	0.599805	0.786394	0.864031	0.452363	0.665997	0.793487		0.693679	0.0620187
86	0.58985	0.780497	0.861913	0.45293	0.65576	0.796026		0.689496	0.0622866
87	0.587883	0.792182	0.865555	0.455756	0.651054	0.794142		0.691095	0.0629586
88	0.580782	0.792964	0.857462	0.455835	0.652886	0.793253		0.688864	0.0625667
89	0.584698	0.791941	0.859753	0.453766	0.651963	0.797591		0.689952	0.0630147
90	0.589305	0.790725	0.861747	0.466011	0.657388	0.79603		0.693534	0.0611512
91	0.588359	0.794036	0.872327	0.458646	0.651943	0.798545		0.693976	0.0635236
92	0.584071	0.800267	0.865519	0.456406	0.656252	0.803003		0.694253	0.0639148

## Sheet: Control Cell1
Frame Number	Nuclear ROI Volume (pixels)	Nuclear Mean Intensity	Nuclear Min Intensity	Nuclear Max Intensity		Frame Number	Cytosol ROI Volume (pixels)	Cytosol Mean Intensity	Cytosol Min Intensity	Cytosol Max Intensity			N/C
1	17950	7031.03	4862	8453		1	7298	5908.18	5101	7000			0.8403
2	17950	7117.69	4880	8541		2	7298	5986.15	5161	7045			0.841024
3	17950	7102.1	4832	8581		3	7298	5982.41	5175	7126			0.842344
4	17950	7195.15	4833	8685		4	7298	6070.94	5194	7151			0.843754
5	17950	7242.45	4873	8706		5	7298	6110.44	5324	7178			0.843699
6	17950	7204.99	4910	8597		6	7298	6130.05	5313	7209			0.850807
7	17950	7286.12	4829	8774		7	7298	6201.12	5329	7312			0.851086
8	17950	7362.42	4907	8810		8	7298	6251.65	5333	7487			0.84913
9	17950	7175.52	4734	8705		9	7298	6925.28	5973	7966			0.965125
10	17950	7108.13	4699	8556		10	7298	7578.05	6697	8563			1.06611
11	17950	6994.25	4679	8573		11	7298	8175.84	7232	9251			1.16894
12	17950	6796.31	4482	8336		12	7298	8592.58	7682	9699			1.2643
13	17950	6809.06	4547	8408		13	7298	9084	8127	10084			1.33411
14	17950	6670.52	4303	8336		14	7298	9396.46	8429	10521			1.40865
15	17950	6603.44	4111	8165		15	7298	9733.2	8708	10759			1.47396
16	17950	6563.78	4282	8163		16	7298	10020	8984	11012			1.52656
17	17950	6447.38	4217	8165		17	7298	10195	9027	11242			1.58127
18	17950	6426.26	4213	8049		18	7298	10428.3	9245	11427			1.62276
19	17950	6358.37	4042	8043		19	7298	10548.2	9434	11541			1.65895
20	17950	6334.8	4079	8080		20	7298	10766.2	9484	11827			1.69954
21	17950	6332.49	4122	8045		21	7298	10905.5	9787	11975			1.72215
22	17950	6275.53	4135	8059		22	7298	10993.1	9687	11984			1.75174
23	17950	6231.33	4134	7978		23	7298	11080.1	9802	12192			1.77814
24	17950	6186.16	4131	7970		24	7298	11177.6	9979	12253			1.80687
25	17950	6183.21	4062	8049		25	7298	11294.7	9953	12414			1.82666
26	17950	6159.92	4035	8052		26	7298	11393.7	10037	12508			1.84966
27	17950	6158.85	3985	8006		27	7298	11482.2	10050	12719			1.86435
28	17950	6128.32	3873	7959		28	7298	11539.8	10221	12767			1.88302
29	17950	6171.36	3987	8002		29	7298	11644.1	10122	12869			1.88679
30	17950	6113.11	3941	7891		30	7298	11679.6	10252	12811			1.91058
31	17950	6115.98	3939	8049		31	7298	11799.4	10437	12938			1.92928
32	17950	6104.58	3950	7973		32	7298	11936	10404	13269			1.95525
33	17950	6169.03	3925	8157		33	7298	12035.9	10449	13328			1.95102
34	17950	6083.55	3894	8057		34	7298	12024.5	10517	13424			1.97656
35	17950	6082.95	4016	8071		35	7298	12094.8	10527	13422			1.9883
36	17950	6076.57	3944	8082		36	7298	12157.1	10529	13546			2.00066
37	17950	6084.43	3913	8019		37	7298	12227.5	10579	13597			2.00964
38	17950	6076.97	4050	8084		38	7298	12227.8	10759	13666			2.01216
39	17950	6058.41	3948	8086		39	7298	12306	10766	13784			2.03123
40	17950	6038.08	3909	8016		40	7298	12259.9	10678	13726			2.03043
41	17950	6056.19	3990	8090		41	7298	12345.2	10677	13700			2.03845
42	17950	6064.85	3989	8244		42	7298	12434.2	10829	13764			2.0502
43	17950	6026	4010	8200		43	7298	12422.3	10811	13806			2.06144
44	17950	6064.7	4008	8171		44	7298	12504.8	10913	13811			2.0619
45	17950	6057.43	3979	8099		45	7298	12552.9	10894	13880			2.07232
46	17950	6027.37	3907	8142		46	7298	12576.5	10885	14091			2.08657
47	17950	6022.26	3882	8192		47	7298	12637.3	10932	14070			2.09843
48	17950	6049.92	3852	8432		48	7298	12768.2	11214	14283			2.11047
49	17950	6108.79	3854	8251		49	7298	12403.5	10940	13878			2.03043
50	17950	6295.49	4038	8401		50	7298	12027.5	10276	13460			1.91049
51	17950	6412.63	4206	8462		51	7298	11524.9	10147	12846			1.79721
52	17950	6542.89	4233	8450		52	7298	11045.4	9521	12263			1.68815
53	17950	6672.92	4370	8586		53	7298	10618.9	9260	11856			1.59134
54	17950	6833.92	4575	8922		54	7298	10262.6	8920	11574			1.50172
55	17950	6889.42	4698	8957		55	7298	9918.36	8478	11192			1.43965
56	17950	6959.04	4548	8980		56	7298	9587.74	8212	10846			1.37774
57	17950	7134.99	4600	9045		57	7298	9442.66	7954	10711			1.32343
58	17950	7284.18	4912	9113		58	7298	9276.59	7921	10565			1.27353
59	17950	7307.04	5003	9136		59	7298	9057.8	7923	10345			1.2396
60	17950	7380.03	4960	9254		60	7298	8938.98	7356	10462			1.21124
61	17950	7455.61	5151	9365		61	7298	8808.21	7610	10117			1.18142
62	17950	7554.83	4976	9391		62	7298	8795.13	7469	10231			1.16417
63	17950	7604.5	5097	9454		63	7298	8652.21	7055	10180			1.13778
64	17950	7636.38	5050	9598		64	7298	8577.87	7261	10018			1.12329
65	17950	7692.15	5143	9625		65	7298	8523.75	7276	10042			1.10811
66	17950	7768.38	5258	9787		66	7298	8523.72	7198	10086			1.09723
67	17950	7792.31	5094	9656		67	7298	8437.69	7171	10062			1.08282
68	17950	7853.78	5179	9720		68	7298	8439.81	7089	10075			1.07462
69	17950	7865.46	5363	9869		69	7298	8440.71	7009	9883			1.07314
70	17950	7911.24	5325	9813		70	7298	8422.98	7163	9902			1.06469
71	17950	7927.5	5317	9966		71	7298	8422.23	7022	10158			1.06241
72	17950	8036.79	5436	10238		72	7298	8412.38	7030	10192			1.04673
73	17950	8082.96	5475	10115		73	7298	8421.71	7040	9974			1.04191
74	17950	8073.18	5363	10175		74	7298	8437.97	7027	10107			1.04519
75	17950	8063.97	5306	10034		75	7298	8449.28	7121	10291			1.04778
76	17950	8092.92	5376	10163		76	7298	8474.2	7060	10355			1.04711
77	17950	8225.59	5437	10298		77	7298	8523.89	7006	10397			1.03627
78	17950	8241.91	5395	10356		78	7298	8499.21	7130	10227			1.03122
79	17950	8276.06	5500	10552		79	7298	8529.21	7183	10328			1.03059
80	17950	8305.4	5638	10412		80	7298	8515.45	7107	10265			1.02529
81	17950	8347.58	5622	10508		81	7298	8536.9	7108	10419			1.02268
82	17950	8474.96	5612	10701		82	7298	8625.46	7214	10487			1.01776
83	17950	8455.43	5791	10917		83	7298	8576.28	7078	10199			1.01429
84	17950	8447.17	5729	10475		84	7298	8568.72	7196	10560			1.01439
85	17950	8571.79	5702	10795		85	7298	8655.2	7194	10488			1.00973
86	17950	8605.47	5762	10781		86	7298	8672.18	7278	10364			1.00775
87	17950	8606.92	5639	10927		87	7298	8678.51	7121	10344			1.00832
88	17950	8710.4	5621	11028		88	7298	8710.24	7308	10667			0.999981
89	17950	8727.49	5714	10991		89	7298	8683.08	7227	10359			0.994911
90	17950	8764.64	5861	11203		90	7298	8724.89	7293	10475			0.995465
91	17950	8716.97	5902	11070		91	7298	8656.17	7051	10339			0.993024
92	17950	8758.1	5830	11040		92	7298	8639.77	7024	10419			0.986489
93	17950	8785.48	5978	11084		93	7298	8625.16	6810	10190			0.981751

## Sheet: Control Cell2
Frame Number	Nuclear ROI Volume (pixels)	Nuclear Mean Intensity	Nuclear Min Intensity	Nuclear Max Intensity			Frame Number	Cytosol ROI Volume (pixels)	Cytosol Mean Intensity	Cytosol Min Intensity	Cytosol Max Intensity		N/C
1	10051	3796.31	3039	4402			1	6240	3519.38	3031	4038			0.927052
2	10051	3827.37	3082	4491			2	6240	3546.03	3077	4152			0.926493
3	10051	3848.89	3047	4444			3	6240	3560.98	3043	4154			0.925196
4	10051	3860.7	2934	4416			4	6240	3581.84	3037	4125			0.927771
5	10051	3859.66	3119	4429			5	6240	3586.27	3103	4092			0.929169
6	10051	3895.47	3180	4443			6	6240	3618.07	3102	4253			0.928788
7	10051	3951.24	3081	4548			7	6240	3640.15	3110	4170			0.921267
8	10051	3937.06	3206	4622			8	6240	3647.15	3056	4195			0.926365
9	10051	3879.68	3076	4505			9	6240	3949.59	3465	4570			1.01802
10	10051	3842.72	3063	4450			10	6240	4224.9	3716	4777			1.09946
11	10051	3762.41	2992	4453			11	6240	4423.18	3788	5003			1.17562
12	10051	3724.93	2986	4392			12	6240	4648.18	4065	5220			1.24786
13	10051	3670.84	2947	4323			13	6240	4812.15	4156	5354			1.31091
14	10051	3609.93	2889	4291			14	6240	4940.84	4389	5564			1.36868
15	10051	3575.72	2791	4278			15	6240	5061.03	4462	5639			1.41538
16	10051	3556.07	2806	4302			16	6240	5205.58	4592	5946			1.46386
17	10051	3525.32	2742	4294			17	6240	5318.06	4647	5894			1.50854
18	10051	3551.61	2769	4363			18	6240	5432.36	4807	6058			1.52955
19	10051	3546.36	2641	4342			19	6240	5526.56	4824	6132			1.55837
20	10051	3556.6	2776	4308			20	6240	5614.75	4886	6245			1.57868
21	10051	3529.18	2738	4313			21	6240	5666.41	5027	6384			1.60559
22	10051	3513.06	2730	4298			22	6240	5710.18	4979	6361			1.62541
23	10051	3477.64	2646	4196			23	6240	5765.78	5111	6344			1.65796
24	10051	3473.43	2654	4354			24	6240	5792.41	5153	6423			1.66763
25	10051	3469.95	2603	4272			25	6240	5806.8	5115	6434			1.67345
26	10051	3434.11	2676	4244			26	6240	5824.63	5205	6502			1.69611
27	10051	3404.44	2544	4239			27	6240	5859.48	5147	6583			1.72113
28	10051	3381.18	2600	4253			28	6240	5890.49	5125	6517			1.74214
29	10051	3385.95	2609	4321			29	6240	5936.55	5230	6661			1.75329
30	10051	3357.5	2561	4217			30	6240	5932.59	5214	6565			1.76696
31	10051	3355.97	2607	4211			31	6240	5923.26	5325	6643			1.76499
32	10051	3364.39	2531	4234			32	6240	5964.83	5319	6550			1.77293
33	10051	3352.98	2490	4207			33	6240	5966.94	5298	6674			1.77959
34	10051	3322.31	2462	4242			34	6240	5959.05	5163	6642			1.79365
35	10051	3329	2485	4256			35	6240	5990.16	5229	6637			1.79939
36	10051	3306.17	2472	4203			36	6240	5965.68	5264	6665			1.80441
37	10051	3328.97	2419	4256			37	6240	6005.63	5353	6652			1.80405
38	10051	3318.81	2493	4256			38	6240	6018.84	5301	6752			1.81355
39	10051	3333.83	2496	4270			39	6240	6057.5	5318	6641			1.81698
40	10051	3307.12	2472	4159			40	6240	6045.3	5358	6798			1.82797
41	10051	3280.88	2493	4115			41	6240	6006.25	5282	6615			1.83068
42	10051	3264	2480	4122			42	6240	5980.06	5380	6640			1.83212
43	10051	3277.12	2505	4142			43	6240	5993.54	5322	6666			1.82891
44	10051	3232.08	2438	4149			44	6240	5953.05	5282	6575			1.84186
45	10051	3248.61	2507	4159			45	6240	5975.43	5303	6641			1.83938
46	10051	3252.08	2362	4070			46	6240	5955.23	5295	6627			1.83121
47	10051	3231.79	2483	4188			47	6240	5949.83	5292	6613			1.84103
48	10051	3258.07	2444	4105			48	6240	5945.97	5340	6638			1.825
49	10051	3278.62	2484	4296			49	6240	5770.63	5056	6410			1.76008
50	10051	3336.1	2520	4210			50	6240	5584.04	4874	6209			1.67382
51	10051	3384.16	2580	4151			51	6240	5393.39	4700	6003			1.59372
52	10051	3407.47	2536	4177			52	6240	5215.64	4540	5788			1.53065
53	10051	3438.83	2604	4302			53	6240	5033.54	4398	5786			1.46374
54	10051	3477.76	2724	4211			54	6240	4901.73	4313	5528			1.40945
55	10051	3533.37	2761	4372			55	6240	4782.47	4139	5344			1.35352
56	10051	3568.24	2815	4326			56	6240	4682.43	4021	5341			1.31225
57	10051	3592.43	2791	4288			57	6240	4585.63	3918	5249			1.27647
58	10051	3614.71	2881	4394			58	6240	4510.22	3940	5232			1.24774
59	10051	3639.45	2931	4342			59	6240	4436.36	3787	5040			1.21896
60	10051	3633.67	2856	4380			60	6240	4364.43	3725	5012			1.20111
61	10051	3691.96	2956	4446			61	6240	4330.95	3725	4979			1.17307
62	10051	3688.9	2926	4374			62	6240	4270.18	3641	4964			1.15757
63	10051	3676.46	2979	4288			63	6240	4205.29	3590	4909			1.14384
64	10051	3688.57	2991	4351			64	6240	4182.64	3598	4837			1.13395
65	10051	3740.2	2964	4439			65	6240	4175.78	3556	4841			1.11646
66	10051	3779.96	3051	4423			66	6240	4147.82	3532	4840			1.09732
67	10051	3763.46	3038	4487			67	6240	4118.07	3494	4884			1.09422
68	10051	3809.49	3025	4483			68	6240	4124.02	3489	4834			1.08256
69	10051	3795.74	3005	4415			69	6240	4089.79	3479	4687			1.07747
70	10051	3826.1	3019	4522			70	6240	4075	3471	4778			1.06505
71	10051	3780.77	2929	4449			71	6240	4056.8	3410	4704			1.07301
72	10051	3766.04	3026	4522			72	6240	4044.33	3456	4668			1.07389
73	10051	3754.74	2926	4480			73	6240	4022.8	3423	4649			1.07139
74	10051	3748.06	2953	4547			74	6240	4021.24	3252	4663			1.07289
75	10051	3734.07	2953	4466			75	6240	4001.43	3353	4599			1.0716
76	10051	3730.57	2873	4532			76	6240	3985.61	3385	4666			1.06837
77	10051	3735.09	2985	4464			77	6240	3960.09	3344	4624			1.06024
78	10051	3743	2953	4467			78	6240	3952.12	3281	4503			1.05587
79	10051	3754.84	2947	4488			79	6240	3923.46	3344	4613			1.04491
80	10051	3737.27	2905	4536			80	6240	3903.41	3278	4492			1.04446
81	10051	3740.88	2968	4421			81	6240	3907.98	3132	4551			1.04467
82	10051	3793.76	2936	4513			82	6240	3927.24	3312	4562			1.03519
83	10051	3800.46	3030	4567			83	6240	3911.68	3240	4501			1.02926
84	10051	3798.21	3061	4466			84	6240	3906.69	3307	4501			1.02856
85	10051	3781.11	3046	4582			85	6240	3901.24	3276	4531			1.03177
86	10051	3781.84	3034	4619			86	6240	3891.4	3313	4538			1.02897
87	10051	3778.45	2943	4490			87	6240	3900.8	3202	4533			1.03238
88	10051	3790.07	3054	4518			88	6240	3885.72	3176	4505			1.02524
89	10051	3742.69	2993	4438			89	6240	3866.81	3251	4490			1.03316
90	10051	3764.47	3041	4507			90	6240	3860.26	3226	4424			1.02544
91	10051	3751.51	2898	4575			91	6240	3843.22	3217	4544			1.02445
92	10051	3730.24	2953	4446			92	6240	3835.95	3153	4433			1.02834
93	10051	3744.39	2804	4483			93	6240	3826.19	3239	4489			1.02185

## Sheet: Control Cell3 
Frame Number	Nuclear ROI Volume (pixels)	Nuclear Mean Intensity	Nuclear Min Intensity	Nuclear Max Intensity			Frame Number	Cytosol ROI Volume (pixels)	Cytosol Mean Intensity	Cytosol Min Intensity	Cytosol Max Intensity		N/C
1	3775	17560.9	15753	19653			1	4022	22968	17486	27256		0.764581
2	3775	17528.4	15488	19819			2	4022	22998.8	17596	27180		0.762145
3	3775	17528.9	15680	19933			3	4022	23158.6	17628	27464		0.756909
4	3775	17576.4	15788	19449			4	4022	23246.5	17975	27885		0.756087
5	3775	17616	15921	19336			5	4022	23247.9	18048	27736		0.757746
6	3775	17689.8	15882	19700			6	4022	23508.7	18303	27857		0.752479
7	3775	17725.7	15902	19807			7	4022	23460.7	18232	27950		0.75555
8	3775	17733.1	15733	19947			8	4022	23451.3	18194	27994		0.756167
9	3775	18873.3	16774	21195			9	4022	23380.7	18041	27719		0.807215
10	3775	19778.3	17710	22250			10	4022	23238.8	17674	27541		0.851089
11	3775	20616.3	18567	22754			11	4022	23040.1	17986	27420		0.894801
12	3775	21359.5	19198	23384			12	4022	22763.9	17571	27038		0.938308
13	3775	22081.6	19712	24296			13	4022	22630.2	17536	26747		0.975759
14	3775	22684.8	20269	25260			14	4022	22374.3	17323	26920		1.01388
15	3775	23377.8	20950	25767			15	4022	22338.9	16991	27292		1.04651
16	3775	23789.9	21185	26662			16	4022	21978.2	16742	26994		1.08243
17	3775	24352.6	21827	26793			17	4022	21892.6	16835	26724		1.11237
18	3775	24721.7	21852	27563			18	4022	21476.8	16161	25687		1.15109
19	3775	25026.5	22308	27744			19	4022	21352.7	16326	25454		1.17205
20	3775	25422	22685	28196			20	4022	21406.6	16686	25135		1.18758
21	3775	25762.8	23253	28871			21	4022	21184.6	16280	25343		1.21611
22	3775	26128.1	23512	28652			22	4022	21167.6	16378	25220		1.23434
23	3775	26159.8	23385	28949			23	4022	20883.5	16212	25038		1.25265
24	3775	26630.9	23638	29922			24	4022	20993.1	16252	25290		1.26855
25	3775	26764.3	24107	29560			25	4022	20802.5	15964	24914		1.28659
26	3775	27087.6	24477	30039			26	4022	20784.5	16014	24965		1.30326
27	3775	27302.4	24753	29978			27	4022	20714.2	16157	24725		1.31805
28	3775	27585.7	24989	30749			28	4022	20767	16209	25176		1.32835
29	3775	27786.7	24876	31006			29	4022	20668.6	16147	24951		1.34439
30	3775	27877.3	25104	30577			30	4022	20492.4	15855	24630		1.36037
31	3775	28119.8	25258	31386			31	4022	20562.1	15922	24991		1.36756
32	3775	28259.1	25735	30850			32	4022	20634.5	16185	25001		1.36951
33	3775	28331.5	25745	31335			33	4022	20597.2	16106	25221		1.3755
34	3775	28539.8	25748	31181			34	4022	20646.8	16007	25056		1.38229
35	3775	28663	25880	31622			35	4022	20685.3	16190	24914		1.38567
36	3775	28746.6	26035	31362			36	4022	20688.7	16157	24961		1.38948
37	3775	28929.8	26236	31627			37	4022	20639.7	16252	24709		1.40166
38	3775	29048.9	26263	31799			38	4022	20649.8	15831	24875		1.40674
39	3775	29297.3	26219	32109			39	4022	20780.3	16554	24940		1.40986
40	3775	29216.8	26521	31621			40	4022	20751.2	16456	24568		1.40795
41	3775	29149.2	26546	31500			41	4022	20729.9	16289	24744		1.40614
42	3775	29210.8	26729	31833			42	4022	20585.8	16236	24614		1.41897
43	3775	29302.6	26665	32095			43	4022	20551.4	16237	24506		1.42582
44	3775	29451.9	26924	31820			44	4022	20678.1	16381	24448		1.4243
45	3775	29468.9	27036	31727			45	4022	20584	16014	24357		1.43164
46	3775	29652.2	27254	31756			46	4022	20524.4	15911	24419		1.44473
47	3775	29674.2	27321	32089			47	4022	20594.6	16097	24485		1.44087
48	3775	29611.4	27327	32001			48	4022	20507.3	15970	24495		1.44394
49	3775	29181	26714	31398			49	4022	20653.8	15836	24630		1.41286
50	3775	28307.8	25946	30627			50	4022	20723.9	16013	25263		1.36595
51	3775	27747.4	25589	30332			51	4022	21001.7	16400	24925		1.3212
52	3775	27122.7	24909	29181			52	4022	21296.9	16373	25034		1.27355
53	3775	26450.9	24185	28577			53	4022	21450.1	16549	25602		1.23314
54	3775	25881.5	23575	28060			54	4022	21693.3	16875	25808		1.19306
55	3775	25247	23224	27324			55	4022	21583.8	16972	25620		1.16972
56	3775	24863.3	22997	26806			56	4022	21832.9	17088	26051		1.1388
57	3775	24517.1	22464	26331			57	4022	22067.8	17478	26329		1.11099
58	3775	24089.8	21997	26764			58	4022	22309.2	17573	26715		1.07982
59	3775	23782.4	21504	25879			59	4022	22453.2	17645	26854		1.0592
60	3775	23595.9	21800	25560			60	4022	22828.1	18185	27956		1.03364
61	3775	23126.7	21385	24861			61	4022	22639.1	17926	27017		1.02154
62	3775	22880.8	20772	24728			62	4022	22682.3	17662	27349		1.00875
63	3775	22573.1	20370	24189			63	4022	22742.3	17656	27356		0.992563
64	3775	22495	20232	24171			64	4022	22928.1	18134	27330		0.981111
65	3775	22268.3	20236	24095			65	4022	22989.5	18232	27124		0.968632
66	3775	22073.7	19997	23703			66	4022	22975.3	18253	27475		0.960756
67	3775	21966.6	19733	23668			67	4022	23137.4	18463	27515		0.949401
68	3775	22062.3	19644	24042			68	4022	23394.5	18525	27879		0.943054
69	3775	21896.3	19711	23837			69	4022	23519.7	18638	28348		0.930979
70	3775	21756	19583	23446			70	4022	23586.8	18448	28010		0.922383
71	3775	21555.6	19341	23166			71	4022	23569.1	18260	27881		0.914568
72	3775	21481.6	19263	23169			72	4022	23482.6	18581	27733		0.914788
73	3775	21433.1	19260	23670			73	4022	23683.8	18822	28113		0.904966
74	3775	21382	19341	23629			74	4022	23793	18707	28055		0.898668
75	3775	21252.9	18989	23169			75	4022	23719.8	18928	28083		0.895998
76	3775	21308.9	19197	23377			76	4022	23973.1	18979	28196		0.888865
77	3775	21313.1	19066	23246			77	4022	24056.6	18851	28541		0.885958
78	3775	21142	18981	22945			78	4022	24080.5	18990	28336		0.877972
79	3775	21058.3	18841	22757			79	4022	24130.6	19403	28649		0.872682
80	3775	21030.4	19087	22629			80	4022	24253.2	19543	28740		0.867116
81	3775	21130.2	19036	22844			81	4022	24422.7	19489	29308		0.865185
82	3775	20997.1	18951	22911			82	4022	24446.7	19545	29046		0.858892
83	3775	21015.4	18983	23151			83	4022	24591.8	19738	29152		0.854568
84	3775	20878.9	18719	23039			84	4022	24386.4	19068	29271		0.856168
85	3775	20857.8	18957	22859			85	4022	24357.4	19535	28907		0.856326
86	3775	20641	18592	22363			86	4022	23993.7	18964	28857		0.86027
87	3775	20567.1	18406	22627			87	4022	23775	18621	28247		0.865072
88	3775	20603.7	18752	22333			88	4022	24083.1	19337	28284		0.855527
89	3775	20615.6	18800	22608			89	4022	24155.1	19075	28523		0.853471
90	3775	20498.9	18721	22413			90	4022	24061.2	19342	28524		0.851952
91	3775	20525.4	18727	22516			91	4022	24058	19441	28164		0.853164
92	3775	20737.1	18982	22560			92	4022	24299.7	19634	28460		0.853387
93	3775	20464.6	18584	22516			93	4022	24204.6	19562	28774		0.845486

## Sheet: Control Cell4
Frame Number	Nuclear ROI Volume (pixels)	Nuclear Mean Intensity	Nuclear Min Intensity	Nuclear Max Intensity			Frame Number	Cytosol ROI Volume (pixels)	Cytosol Mean Intensity	Cytosol Min Intensity	Cytosol Max Intensity		N/C
1	4602	11674.6	9979	13431			1	10141	21339.9	18476	23559		0.547082
2	4602	11858	10120	13517			2	10141	21730.4	19078	23719		0.545687
3	4602	11793.1	10052	13719			3	10141	21718.6	19261	23684		0.542993
4	4602	11844.6	10077	13423			4	10141	21867	19430	24003		0.541666
5	4602	11842.8	10292	13453			5	10141	21953.7	19400	24074		0.539443
6	4602	11871.9	10214	13539			6	10141	22269.1	19803	24816		0.533109
7	4602	12041.2	10404	13629			7	10141	22418.7	19965	24495		0.537107
8	4602	12029.2	10233	13599			8	10141	22304.6	19563	24468		0.539314
9	4602	13047.7	11255	14730			9	10141	22199.9	19838	24207		0.587737
10	4602	13890.9	11924	15671			10	10141	21782.3	19242	23836		0.637716
11	4602	14698.6	12794	16478			11	10141	21545.2	19117	23626		0.682224
12	4602	15474.2	13449	17389			12	10141	21354.9	18859	23192		0.724621
13	4602	16104.8	13842	17967			13	10141	21161.6	18482	23041		0.761038
14	4602	16662.7	14546	18603			14	10141	20935.8	18178	22723		0.795893
15	4602	17340.6	15063	19339			15	10141	20852	18097	22712		0.831603
16	4602	17794.3	15459	19623			16	10141	20644.5	17828	22675		0.861938
17	4602	18254.2	16040	20239			17	10141	20562.6	17693	22828		0.887738
18	4602	18770	16478	20803			18	10141	20546.2	17942	23031		0.913552
19	4602	18989.1	16712	21272			19	10141	20423.9	17603	22932		0.929748
20	4602	19481.2	17035	21684			20	10141	20389.2	17432	22849		0.955467
21	4602	19768.4	17398	21805			21	10141	20240	17615	22699		0.976697
22	4602	19972.6	17643	22122			22	10141	20093.4	17166	22288		0.993987
23	4602	20193.5	17877	22373			23	10141	19901.5	17289	22233		1.01467
24	4602	20691.4	18330	23029			24	10141	19963.8	17024	22454		1.03644
25	4602	21107.9	18546	23480			25	10141	20117.9	17258	22698		1.04921
26	4602	21444.8	18739	23877			26	10141	19965.7	16907	22275		1.07408
27	4602	21658.2	19019	24185			27	10141	19896.7	16576	22624		1.08853
28	4602	21803	19267	24319			28	10141	19823.3	16646	22615		1.09987
29	4602	22033.3	19208	24568			29	10141	19791.3	16406	22790		1.11329
30	4602	22283.6	19675	24708			30	10141	19743.1	16526	22860		1.12868
31	4602	22291.7	19654	25035			31	10141	19766.6	16317	22929		1.12775
32	4602	22509.8	19930	25285			32	10141	19825.9	16291	22978		1.13537
33	4602	22622.2	20028	25335			33	10141	19713.5	16183	23036		1.14755
34	4602	22770.9	20042	25131			34	10141	19815.2	16132	23128		1.14917
35	4602	22725.9	20138	25480			35	10141	19730.9	16146	23380		1.15179
36	4602	22869.1	20118	25501			36	10141	19724.1	16199	23126		1.15945
37	4602	23229.5	20320	25926			37	10141	19839.2	15935	23443		1.17089
38	4602	23282.2	20590	26150			38	10141	19823.1	16279	23805		1.1745
39	4602	23292.2	20653	25937			39	10141	19649.6	16096	24033		1.18538
40	4602	23513.1	20936	26337			40	10141	19568.5	15807	23762		1.20158
41	4602	23557.9	20766	26173			41	10141	19486.7	15806	23543		1.20892
42	4602	23692.6	21073	26004			42	10141	19421.9	15624	23238		1.21989
43	4602	23860.4	21267	26329			43	10141	19416.4	15476	23412		1.22888
44	4602	23713.2	20920	26143			44	10141	19213	15448	23457		1.23423
45	4602	23837.5	21108	26342			45	10141	19239.7	15360	23334		1.23898
46	4602	24092.9	21306	26472			46	10141	19277.5	15245	23203		1.24979
47	4602	23976.1	21049	26587			47	10141	19248.2	15213	23406		1.24563
48	4602	23994.7	20799	26466			48	10141	19387.3	15467	23895		1.23765
49	4602	23118.4	20101	25517			49	10141	19474.4	15887	23385		1.18712
50	4602	22565.8	19740	24861			50	10141	19953.2	15998	24036		1.13093
51	4602	21774.5	19143	24202			51	10141	20343.1	16590	23902		1.07036
52	4602	20969.5	18294	23239			52	10141	20629.2	16533	24103		1.0165
53	4602	20124.6	17452	22634			53	10141	20853.2	17147	24514		0.96506
54	4602	19384	16806	21768			54	10141	20979.5	17403	23954		0.92395
55	4602	19103.3	16683	21522			55	10141	21612.7	17885	24922		0.883893
56	4602	18471	16133	21193			56	10141	21770.2	18276	24967		0.848454
57	4602	18142.9	15525	20348			57	10141	22075.2	18521	24820		0.821866
58	4602	17739.6	15581	19761			58	10141	22200.6	18519	25128		0.799058
59	4602	17499.1	15250	19583			59	10141	22405.6	18614	25437		0.781012
60	4602	17190.2	15088	19176			60	10141	22519.3	18819	25389		0.763356
61	4602	16925.3	14900	19011			61	10141	22658.2	18759	25596		0.746982
62	4602	16705.9	14422	18656			62	10141	22690.8	18762	25819		0.736242
63	4602	16375.9	14313	18137			63	10141	22741.4	18812	25353		0.720094
64	4602	16268.2	14152	18303			64	10141	22853.9	19089	25558		0.711835
65	4602	16125.1	14161	18064			65	10141	23045.5	19372	25617		0.699706
66	4602	16108.7	14106	17911			66	10141	23192.7	19378	25730		0.694561
67	4602	16039.2	14106	18123			67	10141	23306	19632	25931		0.688201
68	4602	15877.7	13881	17957			68	10141	23202.1	19772	26113		0.684325
69	4602	15722.9	13615	17717			69	10141	23245.3	19521	25799		0.676389
70	4602	15578.8	13607	17568			70	10141	23234	19941	25921		0.670516
71	4602	15596.6	13273	17562			71	10141	23432	20475	26158		0.665614
72	4602	15440.7	13279	17377			72	10141	23442.9	20213	26002		0.658649
73	4602	15438.6	13161	17456			73	10141	23599.5	20720	26367		0.654191
74	4602	15291.5	13263	17364			74	10141	23568.3	20404	26190		0.648816
75	4602	15143	12863	17244			75	10141	23561.3	20652	26310		0.642708
76	4602	15258.3	13172	17335			76	10141	23835.2	20652	26470		0.640158
77	4602	15056.4	12995	17319			77	10141	23674.6	20555	26272		0.635973
78	4602	14905.2	12729	17033			78	10141	23753.3	20527	26412		0.627499
79	4602	14810	12600	17189			79	10141	23683.9	20449	26308		0.625321
80	4602	14878.6	12853	16861			80	10141	23676.3	20392	26269		0.62842
81	4602	14968.7	12643	16860			81	10141	23837.6	20627	26051		0.627944
82	4602	14877	12655	16975			82	10141	23646.1	20514	26006		0.629151
83	4602	14878.8	12641	17015			83	10141	23567.6	20801	26267		0.631326
84	4602	14840.6	12650	16892			84	10141	23581.6	20955	25930		0.629331
85	4602	14862.5	12664	17149			85	10141	23747.6	21136	26039		0.625853
86	4602	15036.9	12767	17291			86	10141	23958.5	20983	26298		0.62762
87	4602	14957.7	12714	17064			87	10141	23905.7	21102	26187		0.625694
88	4602	14934.5	12743	17036			88	10141	23771.9	21128	25903		0.628242
89	4602	14832.1	12612	16816			89	10141	23742.9	20316	26124		0.624696
90	4602	14583.8	12234	16791			90	10141	23603.5	21022	26134		0.617869
91	4602	14679.4	12268	16718			91	10141	23697.3	20945	26149		0.619453
92	4602	14752.1	12386	17088			92	10141	23684.4	20178	26175		0.622863
93	4602	14725.3	12355	16854			93	10141	23425.9	20854	25907		0.628591

## Sheet: Control Cell5
Frame Number	Nuclear ROI Volume (pixels)	Nuclear Mean Intensity	Nuclear Min Intensity	Nuclear Max Intensity			Frame Number	Cytosol ROI Volume (pixels)	Cytosol Mean Intensity	Cytosol Min Intensity	Cytosol Max Intensity		N/C
1	4550	10279.7	8988	11816			1	4361	14965.3	12898	16407		0.6869
2	4550	10263.6	8839	11786			2	4361	15041	12904	16433		0.682375
3	4550	10321.9	8954	11818			3	4361	15012.8	12965	16584		0.687544
4	4550	10394.6	9133	11823			4	4361	15156.9	13242	16678		0.685798
5	4550	10436.8	8789	12030			5	4361	15262	13296	16777		0.683842
6	4550	10447.5	9184	11951			6	4361	15343.6	13102	16667		0.680903
7	4550	10510.8	9124	12082			7	4361	15488.6	13690	16864		0.678615
8	4550	10511.2	9213	12027			8	4361	15594.5	13733	16758		0.674033
9	4550	11290.2	10146	12750			9	4361	15790.1	14145	17246		0.715019
10	4550	11776.1	10699	13017			10	4361	15570.3	14054	17074		0.756318
11	4550	12261	11240	13480			11	4361	15421.3	13671	16684		0.795065
12	4550	12726	11658	13973			12	4361	15396.4	13620	16606		0.826556
13	4550	13153.5	12241	14248			13	4361	15300.7	13480	16618		0.85967
14	4550	13619.6	12538	14720			14	4361	15275.9	13311	16721		0.891576
15	4550	13924.4	12958	14951			15	4361	15070.3	13240	16436		0.923964
16	4550	14253.6	13341	15242			16	4361	14967.2	13273	16303		0.952322
17	4550	14527.8	13648	15483			17	4361	14806.7	13140	16335		0.981166
18	4550	14834.6	13832	15757			18	4361	14759.5	12932	16209		1.00509
19	4550	15020.2	13791	15922			19	4361	14578.2	12838	16204		1.03032
20	4550	15342.8	14285	16342			20	4361	14616.3	12848	16271		1.04971
21	4550	15478.4	14460	16463			21	4361	14567.3	12673	16226		1.06255
22	4550	15880.5	14658	16934			22	4361	14701.2	12469	16590		1.08022
23	4550	15944.4	14990	16944			23	4361	14574.4	12674	16690		1.094
24	4550	16085.2	15043	17273			24	4361	14515.4	12632	16655		1.10815
25	4550	16306.7	15148	17646			25	4361	14548.7	12728	16573		1.12083
26	4550	16466.6	15477	17433			26	4361	14525.1	12510	16360		1.13366
27	4550	16562.7	15476	17942			27	4361	14477.8	12604	16643		1.144
28	4550	16800.4	15597	18201			28	4361	14537.2	12774	16292		1.15568
29	4550	16964	15809	18246			29	4361	14480.7	12568	16305		1.17149
30	4550	17041.1	16027	18186			30	4361	14462.4	12470	16672		1.17831
31	4550	17251.4	16136	18467			31	4361	14501.9	12390	16905		1.18959
32	4550	17282.7	16076	18450			32	4361	14395	12550	16406		1.2006
33	4550	17498.1	16330	18842			33	4361	14381.1	12522	16454		1.21675
34	4550	17549.1	16327	18805			34	4361	14280	12316	16471		1.22893
35	4550	17616.9	16391	18944			35	4361	14250	12277	16503		1.23628
36	4550	17731.7	16493	18964			36	4361	14251.6	12223	16483		1.24419
37	4550	17829.1	16586	19107			37	4361	14264.8	12214	16358		1.24986
38	4550	17834.1	16539	18974			38	4361	14256.6	12318	16560		1.25094
39	4550	18023.8	16700	19266			39	4361	14286.2	11852	16332		1.26162
40	4550	17960.3	16810	19411			40	4361	14171.4	12189	16426		1.26736
41	4550	18081.1	16805	19473			41	4361	14165.6	12256	16343		1.27641
42	4550	18160.1	16883	19432			42	4361	14074.1	11849	16317		1.29032
43	4550	18240.7	17012	19559			43	4361	14109.6	12051	16632		1.29279
44	4550	18474.8	17023	20087			44	4361	14246.8	11981	16253		1.29677
45	4550	18110.2	16721	19375			45	4361	13872.5	11676	16031		1.30547
46	4550	18451.8	17191	19764			46	4361	14073.1	12155	16027		1.31114
47	4550	18352.1	17027	19588			47	4361	14017.9	11924	16177		1.30919
48	4550	18375.2	17088	19844			48	4361	14035	11974	16155		1.30924
49	4550	17984.4	16699	19340			49	4361	14115.8	12210	16270		1.27407
50	4550	17515.7	16263	18727			50	4361	14302.4	12223	16622		1.22467
51	4550	17032	15670	18259			51	4361	14531	12467	16762		1.17211
52	4550	16486.3	15029	17590			52	4361	14691	12678	16861		1.12221
53	4550	15972.5	14815	17024			53	4361	14805	12886	16873		1.07886
54	4550	15661.5	14466	16839			54	4361	14963.8	13138	17120		1.04663
55	4550	15456.3	14399	16703			55	4361	15161.4	13104	17023		1.01945
56	4550	15144.2	14007	16468			56	4361	15256.6	13351	17046		0.992629
57	4550	14820.6	13712	16046			57	4361	15300.4	13599	17094		0.96864
58	4550	14609	13478	15824			58	4361	15481.4	13712	17122		0.943646
59	4550	14369.1	13238	15491			59	4361	15575.1	13782	17203		0.922567
60	4550	14174.5	13053	15599			60	4361	15664.1	13481	17665		0.904903
61	4550	14022.6	12781	15607			61	4361	15857.9	14151	17547		0.884272
62	4550	13827.7	12669	15111			62	4361	15931.1	14011	17835		0.867971
63	4550	13676.6	12456	15130			63	4361	15943.1	13831	17621		0.857836
64	4550	13755.2	12491	15126			64	4361	16185.8	14358	17703		0.849835
65	4550	13454.7	12226	14901			65	4361	16027.1	14016	17786		0.839492
66	4550	13459.5	12065	14938			66	4361	16209.5	14131	17797		0.830347
67	4550	13251.2	11923	14526			67	4361	16189.9	14183	17733		0.818486
68	4550	13173.2	11912	14668			68	4361	16211.8	14367	17785		0.812569
69	4550	13064.4	11770	14518			69	4361	16254.6	14511	17673		0.803737
70	4550	12996.1	11717	14517			70	4361	16332.8	14392	18170		0.795705
71	4550	12896.3	11437	14335			71	4361	16272.5	14451	17962		0.792522
72	4550	12747.4	11377	14177			72	4361	16188	14232	17779		0.787458
73	4550	12741.1	11547	14118			73	4361	16306.9	14482	17896		0.78133
74	4550	12683.7	11490	14047			74	4361	16407.6	14576	17927		0.773042
75	4550	12689.4	11362	14324			75	4361	16546.4	14543	18456		0.766897
76	4550	12563.9	11346	13962			76	4361	16421.3	14413	18013		0.765097
77	4550	12489.3	11189	13964			77	4361	16327.7	14599	17934		0.764918
78	4550	12466	11178	14058			78	4361	16323.6	14464	17976		0.763681
79	4550	12430.8	11254	13734			79	4361	16275.7	14564	17716		0.763765
80	4550	12436.8	10966	14120			80	4361	16335.9	14523	17871		0.761317
81	4550	12508.6	11275	14014			81	4361	16451	14429	17932		0.760356
82	4550	12488.3	11212	13935			82	4361	16495.8	14552	18124		0.757057
83	4550	12365	11135	13902			83	4361	16259.9	14377	17869		0.76046
84	4550	12400	11115	13977			84	4361	16406.7	14575	18663		0.755792
85	4550	12303.2	10830	13710			85	4361	16360.8	14115	18198		0.751992
86	4550	12302.3	10876	13955			86	4361	16376.4	14539	18128		0.751223
87	4550	12304.2	10828	13780			87	4361	16350.7	14329	18084		0.752516
88	4550	12239.8	10882	13728			88	4361	16331.2	14364	18290		0.749472
89	4550	12272.8	10777	13622			89	4361	16340.7	14334	18095		0.751061
90	4550	12300.4	11019	13824			90	4361	16295.5	14208	17983		0.754831
91	4550	12219.5	10824	13816			91	4361	16118.8	14029	17935		0.758093
92	4550	12101.7	10693	13759			92	4361	16040.2	14133	17663		0.754461
93	4550	12197.9	10731	13602			93	4361	16073.7	14102	17712		0.758877

## Sheet: Control Cell6
Frame Number	Nuclear ROI Volume (pixels)	Nuclear Mean Intensity	Nuclear Min Intensity	Nuclear Max Intensity			Frame Number	Cytosol ROI Volume (pixels)	Cytosol Mean Intensity	Cytosol Min Intensity	Cytosol Max Intensity		N/C
1	3537	13698.9	12424	14855			1	6820	18082.2	16108	19798		0.75759
2	3537	13904.2	12325	15225			2	6820	18400.4	16362	20044		0.755648
3	3537	13991.7	12354	15217			3	6820	18546.1	16385	20361		0.754431
4	3537	14017.3	12420	15437			4	6820	18585.7	16323	20546		0.754198
5	3537	13960.3	12353	15183			5	6820	18395.3	16286	20282		0.758903
6	3537	14099.4	12656	15400			6	6820	18500.7	16368	20378		0.762101
7	3537	14166.7	12694	15412			7	6820	18558.6	16550	20493		0.763349
8	3537	14186.6	12629	15559			8	6820	18709.3	16413	20629		0.758262
9	3537	15079.9	13569	16450			9	6820	18604.8	16252	20517		0.810539
10	3537	15995	14367	17405			10	6820	18647.2	16174	20713		0.857771
11	3537	16715.3	15055	18003			11	6820	18352.2	15565	20305		0.910809
12	3537	17439.5	15480	18802			12	6820	18501.7	15448	20840		0.94259
13	3537	18086.9	16091	19487			13	6820	18410.6	15237	20753		0.982418
14	3537	18797.5	16794	20074			14	6820	18532.7	15188	21282		1.01429
15	3537	19228.6	17101	20486			15	6820	18254.3	15001	20747		1.05338
16	3537	19780.1	17744	21055			16	6820	18144.4	15108	20909		1.09015
17	3537	20163	18059	21418			17	6820	18060.8	14911	20625		1.11639
18	3537	20517.8	18605	21718			18	6820	17904.7	14678	20485		1.14595
19	3537	20813.4	18679	22078			19	6820	17825.8	14734	20582		1.1676
20	3537	21038.1	18369	22519			20	6820	17738.6	14704	20452		1.18601
21	3537	21468.2	19124	22846			21	6820	17815.7	14832	20653		1.20501
22	3537	21757	19456	23303			22	6820	17790.5	14641	20534		1.22296
23	3537	21907	19461	23480			23	6820	17671.8	14506	20613		1.23966
24	3537	22392.6	20030	23827			24	6820	17804.5	14494	20672		1.25769
25	3537	22601.8	20065	24298			25	6820	17717.8	14413	20693		1.27566
26	3537	22934.9	20382	24373			26	6820	17801.1	14737	20760		1.2884
27	3537	23435.3	20786	24912			27	6820	18012	14803	21302		1.3011
28	3537	23395.8	20950	24848			28	6820	17808.4	14520	21078		1.31375
29	3537	23588.1	20908	25093			29	6820	17780.5	14410	20845		1.32662
30	3537	23712.1	21205	25202			30	6820	17762.1	14401	20945		1.33499
31	3537	23829.2	20869	25219			31	6820	17631.5	14514	20747		1.35151
32	3537	23956.8	21706	25491			32	6820	17576.5	14374	20658		1.363
33	3537	23944	21631	25254			33	6820	17438.6	14210	20609		1.37305
34	3537	24135	21435	25511			34	6820	17430.4	14081	20463		1.38465
35	3537	24215	21891	25777			35	6820	17310.1	13862	20485		1.3989
36	3537	24360.9	21803	26035			36	6820	17387.9	14182	20268		1.40102
37	3537	24324.9	21931	25863			37	6820	17225.5	14019	20288		1.41215
38	3537	24681.3	22574	26134			38	6820	17328.9	13909	20343		1.42428
39	3537	24610.1	22391	26134			39	6820	17225.3	13919	20322		1.42872
40	3537	24815.2	22580	26319			40	6820	17394.1	13799	20416		1.42664
41	3537	24860.3	22921	26484			41	6820	17239	14068	20274		1.4421
42	3537	24787.1	23060	26296			42	6820	17094.1	14042	20166		1.45004
43	3537	25076.1	23145	26673			43	6820	17109.9	14034	20681		1.46559
44	3537	25120.2	23387	26857			44	6820	17123.2	14021	20393		1.46703
45	3537	25136.6	23174	26628			45	6820	17171.6	14049	20584		1.46384
46	3537	25147.7	23171	26575			46	6820	17252.6	14023	20411		1.45762
47	3537	24896.3	22756	26421			47	6820	17079.9	13700	20292		1.45764
48	3537	24868.4	23092	26226			48	6820	17114.7	13995	20320		1.45304
49	3537	24287.5	22686	25794			49	6820	17113.3	13846	20365		1.41921
50	3537	23644	21910	24953			50	6820	17260.5	14305	20615		1.36983
51	3537	23000.1	21127	24541			51	6820	17429.4	14554	20505		1.31961
52	3537	22483.9	20975	23965			52	6820	17682.1	14719	21125		1.27156
53	3537	21787.4	20371	22924			53	6820	17843.1	15207	20989		1.22105
54	3537	21386.5	20081	22544			54	6820	18068.2	15256	20924		1.18366
55	3537	20808.2	19327	22160			55	6820	18059	15317	21050		1.15223
56	3537	20544.7	19298	21665			56	6820	18379.6	15831	21320		1.1178
57	3537	19956.2	18650	21297			57	6820	18276.2	15627	21070		1.09192
58	3537	19522.5	18339	20757			58	6820	18181.8	15331	20985		1.07374
59	3537	19289.4	18139	20876			59	6820	18401.3	15866	21420		1.04826
60	3537	18881.4	17562	20250			60	6820	18290.4	15395	21472		1.03231
61	3537	18784.2	17328	20371			61	6820	18727.5	15845	21415		1.00303
62	3537	18434.4	17022	19738			62	6820	18605.9	15946	21474		0.990781
63	3537	18326.4	17133	19629			63	6820	18816.2	16066	21535		0.97397
64	3537	18189	17071	19726			64	6820	19014.1	16330	21663		0.956605
65	3537	17969.8	16764	20085			65	6820	18909.4	16010	21732		0.950307
66	3537	17869.5	16575	19423			66	6820	18903.9	15798	21662		0.945285
67	3537	17762.1	16423	19447			67	6820	18964.4	16063	22002		0.936604
68	3537	17639.2	16247	19121			68	6820	18911.1	16108	21587		0.932744
69	3537	17473.6	16099	19116			69	6820	18940.2	16325	21700		0.922565
70	3537	17441.2	16125	19102			70	6820	19038.4	16578	21904		0.916105
71	3537	17339.1	15933	18907			71	6820	19024.1	16635	21469		0.911427
72	3537	17389.5	16007	18914			72	6820	19256.1	17054	21587		0.903062
73	3537	17222.7	15948	18816			73	6820	19119.5	16743	21614		0.900796
74	3537	17171.5	15644	19029			74	6820	19139.2	16598	21624		0.89719
75	3537	17157.9	15938	18844			75	6820	19314.7	16853	22129		0.888334
76	3537	17083.5	15605	18821			76	6820	19148.8	16669	22134		0.892141
77	3537	17011.1	15625	18782			77	6820	19189.9	16833	21736		0.886464
78	3537	16916.8	15616	18614			78	6820	19073.2	16440	21565		0.886941
79	3537	16956.4	15798	18699			79	6820	19130	16416	21460		0.886374
80	3537	17000.5	15537	18885			80	6820	19200	16455	21972		0.88544
81	3537	16843.1	15523	18762			81	6820	19147.1	16596	21901		0.879667
82	3537	16723.4	15506	18675			82	6820	19115.3	16724	21718		0.874871
83	3537	16692.3	15358	18231			83	6820	19171.3	16550	21826		0.870694
84	3537	16834.1	15561	18462			84	6820	19285.5	16739	21991		0.872887
85	3537	16709.9	15195	18453			85	6820	18887.1	16338	21482		0.884724
86	3537	16735.3	15380	18221			86	6820	19103.2	16470	21948		0.876051
87	3537	16519.8	15241	18064			87	6820	18765	16181	21655		0.880352
88	3537	16647.7	15395	18258			88	6820	18893.1	16092	21687		0.881151
89	3537	16499.1	15183	18132			89	6820	18683.8	15757	21288		0.883069
90	3537	16424.7	15119	18033			90	6820	18574.6	15668	21271		0.884255
91	3537	16402.1	14862	18119			91	6820	18515.6	15628	21306		0.885855
92	3537	16543.3	15117	18258			92	6820	18778	15959	21430		0.880992
93	3537	16499.4	15361	18225			93	6820	18705.7	15800	21434		0.882052

## Sheet: Starved Cell1
Frame Number	Nuclear ROI Volume (pixels)	Nuclear Mean Intensity	Nuclear Min Intensity	Nuclear Max Intensity			Frame Number	Cytosol ROI Volume (pixels)	Cytosol Mean Intensity	Cytosol Min Intensity	Cytosol Max Intensity		N/C
1	3305	1870.27	1602	2154			1	2950	3671.41	3178	4050		0.509413
2	3305	1886.88	1630	2151			2	2950	3692.53	3209	4142		0.511
3	3305	1900.37	1597	2235			3	2950	3697.07	3231	4091		0.51402
4	3305	1927.16	1620	2199			4	2950	3740.72	3326	4193		0.515184
5	3305	1926.54	1661	2264			5	2950	3745.91	3234	4129		0.514305
6	3305	1958.04	1638	2266			6	2950	3777.22	3295	4253		0.518381
7	3305	1983.24	1665	2293			7	2950	3800.04	3263	4225		0.521899
8	3305	1994.36	1686	2319			8	2950	3848.79	3225	4352		0.518179
9	3305	2169.05	1794	2507			9	2950	3787.89	2965	4330		0.572628
10	3305	2319.98	2033	2646			10	2950	3713.59	3014	4139		0.624728
11	3305	2461.42	2123	2830			11	2950	3670.31	3078	4161		0.67063
12	3305	2551.49	2223	2866			12	2950	3693.84	3142	4128		0.690743
13	3305	2631.99	2225	2960			13	2950	3683.53	3075	4138		0.71453
14	3305	2702.67	2348	3121			14	2950	3651.53	2931	4158		0.740147
15	3305	2753.58	2399	3177			15	2950	3644.31	2977	4108		0.755583
16	3305	2790.37	2403	3210			16	2950	3621.24	3076	4082		0.770556
17	3305	2835.06	2423	3209			17	2950	3649.09	3094	4176		0.776924
18	3305	2892.86	2498	3481			18	2950	3650.52	3021	4108		0.792453
19	3305	2906.04	2476	3357			19	2950	3598.88	3020	4093		0.807485
20	3305	2932.69	2416	3411			20	2950	3604.09	3014	4105		0.81371
21	3305	2962.92	2533	3331			21	2950	3634.08	3082	4160		0.815316
22	3305	3000.78	2472	3420			22	2950	3619.6	3046	4122		0.829038
23	3305	3023.09	2591	3451			23	2950	3633.88	3042	4137		0.831918
24	3305	3050.64	2597	3503			24	2950	3621.19	3076	4159		0.84244
25	3305	3057.49	2604	3592			25	2950	3629.22	3079	4172		0.842467
26	3305	3080.89	2618	3610			26	2950	3644.74	3094	4203		0.845299
27	3305	3100.95	2672	3570			27	2950	3642.6	3084	4129		0.851301
28	3305	3111.93	2643	3495			28	2950	3597.74	3047	4110		0.864968
29	3305	3156.42	2616	3638			29	2950	3660.96	3094	4196		0.862183
30	3305	3167.66	2691	3624			30	2950	3649.59	3078	4245		0.867949
31	3305	3164.47	2675	3584			31	2950	3631.14	2960	4202		0.871479
32	3305	3194.2	2714	3678			32	2950	3621.01	2980	4168		0.88213
33	3305	3186.94	2652	3647			33	2950	3588.91	2985	4248		0.887996
34	3305	3184.74	2720	3685			34	2950	3534.69	3001	4204		0.900997
35	3305	3171.94	2675	3688			35	2950	3499.08	2924	4157		0.906508
36	3305	3192.76	2746	3699			36	2950	3501.64	2871	4136		0.911789
37	3305	3182.19	2694	3977			37	2950	3488.71	2819	4024		0.912138
38	3305	3197.16	2665	4109			38	2950	3458.95	2695	4084		0.924316
39	3305	3165.39	2641	3821			39	2950	3412.52	2741	3951		0.927581
40	3305	3209.49	2641	4316			40	2950	3429.21	2823	3957		0.935927
41	3305	3187.59	2708	4411			41	2950	3425	2753	3997		0.930684
42	3305	3205.29	2652	4301			42	2950	3429.96	2746	4031		0.934498
43	3305	3179.62	2689	4011			43	2950	3389.55	2792	3952		0.938066
44	3305	3193.14	2675	3997			44	2950	3416.98	2726	4014		0.934491
45	3305	3195.82	2589	4129			45	2950	3403.26	2754	4017		0.939047
46	3305	3188.68	2621	4288			46	2950	3408.53	2714	4024		0.9355
47	3305	3199.41	2618	4164			47	2950	3407.94	2793	3996		0.93881
48	3305	3202.01	2649	4108			48	2950	3435.05	2640	4079		0.93216
49	3305	3040.89	2564	3988			49	2950	3526.7	2821	4151		0.862248
50	3305	2930.47	2479	3950			50	2950	3642.51	2799	4321		0.804519
51	3305	2784.86	2345	3327			51	2950	3627.32	2890	4335		0.767747
52	3305	2668.51	2231	3160			52	2950	3657.89	2933	4311		0.72952
53	3305	2612.25	2170	3199			53	2950	3730.05	2976	4457		0.700326
54	3305	2533.21	2140	3072			54	2950	3713.54	2841	4400		0.682156
55	3305	2497.24	2076	3071			55	2950	3731.33	2981	4436		0.669264
56	3305	2452.95	1979	2956			56	2950	3700.37	2827	4350		0.662892
57	3305	2436.34	1945	3076			57	2950	3712.23	2918	4400		0.656299
58	3305	2396.76	1997	2995			58	2950	3691.36	2808	4341		0.649289
59	3305	2402.21	1915	3396			59	2950	3716.31	2740	4511		0.646397
60	3305	2386.26	1950	3179			60	2950	3732.08	2896	4467		0.639391
61	3305	2373.83	1902	3351			61	2950	3682.94	2972	4463		0.644548
62	3305	2354.56	1923	3258			62	2950	3674.85	3026	4373		0.640724
63	3305	2378.48	1879	3421			63	2950	3671.13	3009	4281		0.647887
64	3305	2343.05	1912	3235			64	2950	3674.21	3088	4517		0.637702
65	3305	2335.44	1920	3544			65	2950	3698.1	3045	4387		0.631524
66	3305	2326.13	1881	3144			66	2950	3688	3062	4395		0.63073
67	3305	2294.91	1875	2754			67	2950	3702.55	3040	4467		0.61982
68	3305	2316.72	1889	2787			68	2950	3768.13	3093	4499		0.614819
69	3305	2301.57	1911	2835			69	2950	3761.53	2934	4536		0.611872
70	3305	2336.03	1922	3339			70	2950	3785.98	3069	4502		0.617022
71	3305	2331.92	1888	3290			71	2950	3758.83	3073	4731		0.620385
72	3305	2307.13	1941	3464			72	2950	3735.26	2994	4481		0.617663
73	3305	2332.73	1876	3253			73	2950	3762.35	3096	4518		0.62002
74	3305	2294.9	1870	3192			74	2950	3740.54	2908	4526		0.613521
75	3305	2321.58	1823	3270			75	2950	3769.94	2971	4486		0.615815
76	3305	2356.76	1888	3224			76	2950	3764.34	2999	4611		0.626076
77	3305	2294.64	1818	2809			77	2950	3745.13	3022	4505		0.6127
78	3305	2307.17	1813	3202			78	2950	3731.73	2973	4469		0.618258
79	3305	2329.82	1794	3118			79	2950	3763.5	2986	4472		0.619057
80	3305	2258.67	1840	2643			80	2950	3739.86	3010	4412		0.603945
81	3305	2256.42	1673	2757			81	2950	3760.03	2865	4499		0.600107
82	3305	2255.43	1814	2763			82	2950	3776.71	2899	4448		0.597195
83	3305	2266.2	1827	2709			83	2950	3791.98	2975	4477		0.597631
84	3305	2265.43	1688	2723			84	2950	3825.57	3051	4531		0.592181
85	3305	2290.55	1832	3085			85	2950	3818.82	3025	4582		0.599805
86	3305	2246.61	1754	2811			86	2950	3808.78	2955	4474		0.58985
87	3305	2247.34	1774	2679			87	2950	3822.76	2945	4618		0.587883
88	3305	2266.25	1735	2708			88	2950	3902.07	3134	4761		0.580782
89	3305	2259.3	1824	2760			89	2950	3864.04	2931	4575		0.584698
90	3305	2266.73	1827	2806			90	2950	3846.44	2975	4578		0.589305
91	3305	2252.85	1812	2754			91	2950	3829.04	3007	4512		0.588359
92	3305	2242.36	1754	2731			92	2950	3839.19	3019	4572		0.584071
93	3305	2265.08	1823	2690			93	2950	3860.53	3034	4571		0.586729

## Sheet: Starved Cell2
Frame Number	Nuclear ROI Volume (pixels)	Nuclear Mean Intensity	Nuclear Min Intensity	Nuclear Max Intensity			Frame Number	Cytosol ROI Volume (pixels)	Cytosol Mean Intensity	Cytosol Min Intensity	Cytosol Max Intensity		N/C
1	3316	5201.41	4261	6149			1	5932	8513.89	6959	10435		0.610933
2	3316	5290.11	4288	6176			2	5932	8704.02	6969	10047		0.607778
3	3316	5379.37	4316	6747			3	5932	8752.69	7033	9918		0.614596
4	3316	5513.82	4369	6895			4	5932	8779.69	6966	9859		0.62802
5	3316	5498.29	4414	6818			5	5932	8788.37	6796	9864		0.625632
6	3316	5564.24	4481	6688			6	5932	8935.58	7102	10244		0.622705
7	3316	5515.1	4499	7020			7	5932	9015.24	6737	11487		0.611753
8	3316	5568.13	4641	6753			8	5932	9137.22	6965	10710		0.60939
9	3316	5918.74	4920	7017			9	5932	9066.44	6980	10333		0.652819
10	3316	6151.51	5166	9607			10	5932	8889.28	6908	10115		0.692014
11	3316	6379.92	5368	9641			11	5932	8797.38	6835	10025		0.725206
12	3316	6601.07	5679	10070			12	5932	8754.67	6864	10027		0.754006
13	3316	6683.32	5787	10207			13	5932	8588.61	6267	10170		0.778161
14	3316	6811.9	5915	7921			14	5932	8509	6549	9861		0.800552
15	3316	6904.09	5945	7936			15	5932	8412.49	6188	9599		0.820696
16	3316	7058.19	6221	8049			16	5932	8407.3	6465	9673		0.839531
17	3316	7086.18	6088	7988			17	5932	8262.95	6323	9909		0.857584
18	3316	7093.42	6336	7962			18	5932	8103.69	6172	9565		0.875332
19	3316	7139.14	6335	8222			19	5932	8008.38	6063	9556		0.891459
20	3316	7215.5	6480	8053			20	5932	7937.64	6027	9284		0.909023
21	3316	7217.96	6463	8136			21	5932	7838.95	5922	9268		0.920781
22	3316	7209.97	6337	8147			22	5932	7797.26	5910	9157		0.92468
23	3316	7270.37	6473	8161			23	5932	7715.06	5671	9081		0.942361
24	3316	7357.65	6552	8283			24	5932	7722.15	5837	9166		0.952798
25	3316	7285.32	6466	8242			25	5932	7537.66	5690	8857		0.966522
26	3316	7287	6464	8172			26	5932	7501.49	5549	8965		0.971407
27	3316	7182.23	6457	8036			27	5932	7363.21	5462	8737		0.975421
28	3316	7205.85	6418	8120			28	5932	7320.12	5361	8611		0.984388
29	3316	7261.95	6493	8213			29	5932	7333.21	5611	8797		0.990282
30	3316	7250.61	6435	8136			30	5932	7240.52	5457	8683		1.00139
31	3316	7200.31	6375	8182			31	5932	7199.12	5546	8576		1.00017
32	3316	7229.16	6423	8112			32	5932	7178.92	5511	8534		1.007
33	3316	7284.03	6463	8165			33	5932	7220.9	5512	8757		1.00874
34	3316	7232.62	6452	8060			34	5932	7143.57	5479	8739		1.01247
35	3316	7188.64	6341	8079			35	5932	7114.03	5309	8542		1.01049
36	3316	7174.29	6261	7983			36	5932	7073.69	5377	8736		1.01422
37	3316	7145.36	6408	7999			37	5932	7000.06	5217	8446		1.02076
38	3316	7141.9	6390	8070			38	5932	6989.09	5240	8531		1.02186
39	3316	7120.69	6401	8008			39	5932	6942.44	5097	8504		1.02567
40	3316	7171.15	6334	8106			40	5932	6968.83	5279	8359		1.02903
41	3316	7082.86	6296	7911			41	5932	6893.33	5277	8637		1.02749
42	3316	7090.45	6318	7859			42	5932	6871.25	5188	8324		1.0319
43	3316	7143.79	6284	8059			43	5932	6885.54	5208	8463		1.03751
44	3316	7046.42	6219	7857			44	5932	6816.94	5274	8305		1.03366
45	3316	6998.12	6249	7961			45	5932	6771.5	5151	8392		1.03347
46	3316	6998.54	6062	7764			46	5932	6718.73	5021	8226		1.04165
47	3316	6933.01	6131	7722			47	5932	6629.15	4890	8100		1.04584
48	3316	6836.92	5949	7760			48	5932	6613.53	4974	8052		1.03378
49	3316	6672.9	5803	7452			49	5932	6661.44	4968	8076		1.00172
50	3316	6532.92	5557	7390			50	5932	6723.52	5110	8351		0.971652
51	3316	6405.85	5567	7269			51	5932	6843.21	5089	8424		0.936089
52	3316	6216.9	5344	7205			52	5932	6842.21	5146	8412		0.90861
53	3316	6164.85	5207	7353			53	5932	6971.91	5291	8537		0.884241
54	3316	6016.15	5141	7300			54	5932	6993.68	5172	8666		0.860227
55	3316	5948.93	4842	6962			55	5932	7033.86	5340	8644		0.845756
56	3316	5942.64	4950	7063			56	5932	7107.58	5425	8613		0.836098
57	3316	5864.87	4834	6927			57	5932	7125.32	5387	8588		0.823103
58	3316	5815.47	4858	6993			58	5932	7197.99	5408	8813		0.807929
59	3316	5790.54	4917	6733			59	5932	7200.64	5422	8891		0.80417
60	3316	5723.78	4767	6795			60	5932	7234.74	5488	8921		0.791153
61	3316	5742.48	4798	6819			61	5932	7329.01	5657	9050		0.783527
62	3316	5716.3	4623	6811			62	5932	7283.55	5440	9078		0.784823
63	3316	5700.61	4736	6743			63	5932	7280.53	5474	9068		0.782994
64	3316	5677.44	4696	6643			64	5932	7280.78	5657	8952		0.779785
65	3316	5728.47	4761	6637			65	5932	7390.95	5656	9231		0.775065
66	3316	5635.39	4657	6658			66	5932	7205.68	5337	9111		0.782076
67	3316	5626.5	4645	6587			67	5932	7315.18	5668	9005		0.769154
68	3316	5670	4526	6753			68	5932	7372.99	5591	9202		0.769023
69	3316	5601.5	4679	6678			69	5932	7249.85	5628	9292		0.772637
70	3316	5613.18	4564	6569			70	5932	7295.72	5678	8925		0.76938
71	3316	5585.07	4676	6585			71	5932	7225.48	5682	8966		0.772969
72	3316	5634.14	4622	6631			72	5932	7350.52	5633	9091		0.766494
73	3316	5592.34	4587	6648			73	5932	7253.35	5771	9097		0.771001
74	3316	5604.72	4653	6790			74	5932	7241.24	5720	9163		0.774
75	3316	5586.89	4578	6531			75	5932	7217.88	5532	8892		0.774034
76	3316	5580.35	4568	6642			76	5932	7227.61	5733	8875		0.772087
77	3316	5574.86	4598	6520			77	5932	7220.1	5712	8663		0.77213
78	3316	5582.44	4559	6429			78	5932	7184.21	5739	8878		0.777042
79	3316	5630.74	4726	6599			79	5932	7237.43	5834	8774		0.778003
80	3316	5580.15	4609	6550			80	5932	7184.28	5655	8716		0.776717
81	3316	5606.91	4542	6562			81	5932	7200.14	5793	8696		0.778722
82	3316	5626.61	4693	6785			82	5932	7223.71	5878	9027		0.778908
83	3316	5631.91	4629	6544			83	5932	7209.7	5788	9001		0.781157
84	3316	5578.41	4622	6565			84	5932	7161.86	5685	8738		0.778905
85	3316	5617.02	4541	6548			85	5932	7142.75	5818	8954		0.786394
86	3316	5584.07	4602	6554			86	5932	7154.5	5761	8751		0.780497
87	3316	5620.2	4562	6521			87	5932	7094.58	5638	8999		0.792182
88	3316	5588.94	4621	6540			88	5932	7048.15	5674	8871		0.792964
89	3316	5578.96	4565	6593			89	5932	7044.67	5558	8780		0.791941
90	3316	5618.18	4721	6547			90	5932	7105.1	5505	9152		0.790725
91	3316	5585.69	4630	6611			91	5932	7034.56	5536	8835		0.794036
92	3316	5602.91	4634	6501			92	5932	7001.3	5359	8932		0.800267
93	3316	5597.86	4638	6529			93	5932	7017.07	5389	8653		0.797749

[truncated: 4 more sheets: Starved Cell3, Starved Cell4, Starved Cell5, Starved Cell6]
