# Supplementary material for: Conformation of the nuclear pore in living cells is modulated by transport state
Source: eLife. 2020 Dec 21;9:e60654. doi: 10.7554/eLife.60654 (PMC7752133; doi:10.7554/eLife.60654)
Supplement: Figure 3—figure supplement 2—source data 1. [file elife-60654-fig3-figsupp2-data1.xlsx]

## Sheet: Figure3_S2A_Nup133_8b
Name	Nup133_8b_fed	Nup133_8b_starved
Median	1.08236	1.08491
First Quartile	1.02307	1.03564
Third Quartile	1.13429	1.13568
				ttest:
Data:	1.21883	1.05852		0.680514
	0.996907	0.971863
	1.10129	1.08032
	1.04872	1.09013
	1.25022	1.02876
	0.972028	0.980305
	1.12144	1.0139
	1.10936	1.08983
	1.06083	1.15755
	0.993865	1.1012
	1.08821	0.921178
	1.10905	1.1873
	1.02114	1.13819
	0.936311	1.03432
	1.02918	1.22583
	1.06935	1.19807
	1.07223	1.09791
	1.108	0.990274
	1.15992	1.11675
	1.06016	1.04397
	1.04866	1.27696
	1.10814	0.96988
	1.17498	1.13994
	1.04435	1.14477
	1.07881	1.07143
	1.04147	1.07731
	0.9747	0.983673
	1.0781	1.17794
	1.01297	0.969654
	1.18031	1.15192
	1.14274	0.981629
	1.12649	1.0276
	1.14273	1.17167
	1.01387	1.11751
	1.20081	1.204
	0.945778	1.05599
	1.19863	1.00399
	1.06406	1.04278
	1.00806	1.0376
	1.2212	1.00504
	0.919408	1.02945
	1.10178	0.896821
	1.09478	1.10547
	1.10805	1.09346
	1.18046	1.10101
	1.07592	1.0852
	1.02296	1.18113
	1.15913	1.11246
	0.964286	1.09868
	1.09549	1.06637
	1.09982	1.00999
	1.10911	1.00203
	0.931105	0.967201
	1.18403	1.04604
	1.05712	1.13602
	0.930414	1.07685
	1.08705	1.11676
	0.986506	1.03616
	1.09571	1.06845
	1.13899	1.21872
	1.11722	1.06592
	0.949726	0.880638
	1.05678	0.926279
	1.10443	1.04636
	1.07421	1.09095
	0.968635	1.27839
	1.101	1.10658
	1.18642	1.10957
	1.07574	1.0476
	0.948997	1.08472
	1.0595	1.07085
	1.02802	1.11608
	1.02176	1.13699
	0.918951	0.933396
	1.11297	1.04541
	1.21955	1.10902
	1.042	1.11093
	1.13448	1.01423
	0.976578	0.987193
	1.10924	1.00891
	1.15063	1.12943
	1.09618	1.08646
	1.09302	0.944018
	1.03736	1.10341
	1.08776	0.957514
	1.05132	1.09049
	0.968549	1.03276
	1.13048	1.22007
	1.02212	1.0944
	0.987062	1.08688
	1.12583	1.05228
	0.947569	1.18299
	1.09737	1.01896
	1.04152	1.1322
	1.0467	1.20895
	1.11887	1.1383
	1.006	0.944625
	1.1809	1.00029
	1.07558	1.05108
	1.03654	1.13038
	1.05963	1.01676
	0.928139	0.910828
	1.00118	1.13845
	1.03875	1.09873
	1.09895	1.07273
	1.15401	1.07946
	1.21323	1.205
	1.02003	1.08002
	1.35519	1.11405
	1.06171	1.01358
	1.03277	1.11225
	0.975826	1.2396
	1.03159	1.03509
	0.974486	1.12309
	1.16048	1.04002
	1.11102	1.03503
	1.17733	1.19081
	1.05083	1.08013
	1.13078	1.11549
	1.38211	1.03492
	1.23932	1.0256
	1.18304	1.06356
	0.978511	1.19181
	1.18516	0.957346
	1.1236	1.06466
	1.04437	1.15824
	1.09182	1.09337
	1.18286	1.04407
	1.04657	1.1248
	1.0789	1.16785
	1.11727	0.970628
	1.11925	1.05436
	0.92052	1.11556
	1.0181	0.991207
	1.0423	1.09531
	1.16237	1.07548
	1.08877	1.12966
	0.989777	1.13464
	0.98219	1.08282
	1.20548	1.09824
	1.11387	0.984848
	0.921739	0.956851
	1.16133	1.04463
	1.12845	1.00682
	1.12393	0.951424
	1.12876	1.10336
	0.924078	1.09552
	1.15509	1.15315
	1.07533	1.0455
	1.10415	1.10414
	1.20732	1.04726
	1.04485	1.1024
	1.09221	1.074
	1.21277	1.09053
	1.01533	1.23056
	1.04311	1.11672
	1.01175	1.23694
	0.990301	1.26026
	1.36253	1.07371
	0.992617	1.04383
	1.01914	1.06925
	1.16391	0.943294
	0.973877	1.16609
	1.12979	1.08983
	1.16168	1.15491
	1.06245	1.14863
	0.997245	1.06701
	1.07277	0.973487
	0.969504	1.07075
	1.19688	1.01526
	1.08343	1.09402
	0.885234	1.10838
	1.13372	1.17004
	1.14854	1.14978
	1.18085	1.0574
	1.2257	1.10537
	0.914822	1.11672
	1.06462	1.06214
	1.12072	1.29464
	1.09459	1.14157
	0.948009	1.10877
	1.1549	1.15921
	0.971347	1.14219
	1.03978	1.15431
	1.07359	1.17824
	1.1296	1.12357
	1.25227	1.06676
	1.15482	1.08848
	1.0718	1.33826
	1.0369	1.04004
	1.09461	1.04133
	1.1908	1.19284
	1.09462	1.10814
	1.13305	1.0265
	1.0192	1.16657
	1.00147	1.15526
	1.00183	1.01854
	1.08568	0.914674
	1.1761	1.09693
	1.18174	1.08053
	1.03856	1.15003
	1.21791	1.21053
	1.07253	1.19109
	1.02411	1.13271
	1.09483	1.0413
	1.09524	1.04956
	1.10889	1.00641
	1.17292	1.15523
	1.06307	1.05432
	1.08304	1.14194
	1.09887	1.14641
	1.00539	1.08429
	1.09033	1.06899
	1.04235	1.0851
	1.16477	1.25308
	0.97146	0.973721
	1.07466	1.04936
	1.04825	1.07424
	1.0009	1.23243
	1.03951	1.11415
	1.12638	1.10809
	0.990606	1.0149
	1.05291	1.13635
	0.991247	1.04093
	1.12794	1.11232
	1.015	1.04677
	1.01533	1.01617
	1.14568	1.16956
	1.16234	1.11134
	0.995947	1.07938
	1.17485	0.992834
	1.08808	1.24439
	1.14482	1
	1.1464	1.0662
	1.08594	1.19387
	1.06264	1.18249
	1.18555	0.976162
	1.12486	0.970843
	1.05137	1.17124
	1.09626	0.939499
	1.13793	1.20853
	1.02696	1.06034
	1.1635	1.00805
	1.2041	1.00143
	1.01502	1.11834
	1.18813	1.0318
	1.03862	1.05259
	1.06639	1.15528
	0.998456	1.0361
	1.05506	1.12627
	1.02968	1.05489
	1.06939	1.05511
	1.22879	1.19834
	1.03028	1.01255
	0.981257	1.03548
	1.08772	1.14877
	1.12297	1.15335
	0.87722	1.097
	1.02338	0.951299
	1.1083	1.0941
	1.16704	1.1126
	1.05969	1.04339
	0.952327	1.24023
	1.20051	1.28717
	1.29419	0.959984
	1.17621	1.09698
	1.0965	1.10904
	1.2109	1.06926
	0.93345	1.0522
	1.23793	1.16851
	1.06397	1.20253
	0.977454	1.08871
	1.01386	1.03812
	1.06576	1.14319
	1.08955	1.0494
	1.04599	1.08966
	1.0651	1.11642
	1.06687	1.06336
	1.18762	1.01478
	0.977467	0.947813
	1.09764	1.1657
	1.04952	1.07098
	1.11739	1.01433
	0.979849	1.12807
	1.19267	0.92057
	0.894415	1.04092
	1.08169	1.11564
	1.19264	1.04034
	1.02914	1.08355
	0.928496	1.0539
	1.15094	1.05727
	1.18545	1.13928
	1.05024	1.23096
	1.08613	1.02998
	1.00338	1.01028
	1.09148	0.977712
	1.21698	1.14685
	1.13633	1.11521
	1.10942	0.940371
	1.11372	1.10038

## Sheet: Figure_S2B_Nup133_9a
Name	Nup133_9a_fed	Nup133_9a_starved
Median	1.30908	1.32314
First Quartile	1.24721	1.25186
Third Quartile	1.37086	1.38369
				ttest:
Data:	1.06239	1.2902		0.128402
	1.3268	1.14556
	1.33685	1.2433
	1.06744	1.31457
	1.23966	1.25176
	1.27365	1.38627
	1.35181	1.13819
	1.3764	1.32626
	1.28753	1.30852
	1.40562	1.33884
	1.4066	1.58047
	1.28785	1.28701
	1.38053	1.43712
	1.37117	1.15071
	1.21256	1.05904
	1.37137	1.18291
	1.30105	1.34217
	1.25697	1.18191
	1.50976	1.16205
	1.04326	1.25653
	1.35437	1.38763
	1.42826	1.18646
	1.14804	1.16418
	1.43007	1.35655
	1.34627	1.47512
	1.24257	1.32263
	1.22317	1.51814
	1.25161	1.3454
	1.15367	1.35616
	1.28571	1.27686
	1.35491	1.2752
	1.40385	1.3284
	1.30115	1.37239
	1.14423	1.34813
	1.29179	1.21083
	1.54531	1.19923
	1.30871	1.25217
	1.2537	1.3262
	1.10753	1.38903
	1.25963	1.1576
	1.26235	1.42083
	1.25053	1.22327
	1.32496	1.36212
	1.26738	1.13464
	1.36098	1.37115
	1.31615	1.49272
	1.39348	1.49857
	1.19318	1.25462
	1.32832	1.38402
	1.30435	1.40117
	1.19891	1.15464
	1.34769	1.35464
	1.14545	1.3662
	1.27353	1.42174
	1.21163	1.24043
	1.16716	1.23181
	1.38019	1.34773
	1.45131	1.2439
	1.38024	1.41605
	1.37984	1.1797
	1.33491	1.2791
	1.17225	1.30416
	1.15232	1.34194
	1.2975	1.41194
	1.33956	1.34189
	1.24834	1.4082
	1.30221	1.2189
	1.38688	1.24659
	1.27395	1.31403
	1.40043	1.34543
	1.37121	1.51034
	1.15285	1.35313
	0.970845	1.31725
	1.31224	1.40171
	1.21378	1.33548
	1.54148	1.15009
	1.13821	1.36252
	1.21585	1.57889
	1.15185	1.35241
	1.3869	1.39671
	1.43357	1.39818
	1.18939	1.14689
	1.28596	1.31088
	1.3278	1.27129
	1.36399	1.31408
	1.4582	1.42444
	1.37301	1.27473
	1.47368	1.38827
	1.46835	1.21471
	1.36768	1.10242
	1.29571	1.30329
	1.50676	1.21376
	1.456	1.3021
	1.2409	1.29673
	1.41189	1.18487
	1.29618	1.36397
	1.31563	1.32648
	1.29211	1.29463
	1.52548	1.48548
	1.28571	1.42734
	1.36994	1.45031
	1.18421	1.23045
	1.30946	1.34644
	1.23757	1.19398
	1.32162	1.33975
	1.29976	1.46287
	1.34146	1.10868
	1.35749	1.14851
	1.26014	1.18415
	1.35102	1.24795
	1.35034	1.1633
	1.27107	1.17285
	1.29588	1.48035
	1.20683	1.36589
	1.38835	1.40378
	1.14385	1.31978
	1.31373	1.31831
	1.31514	1.49551
	1.31621	1.55699
	1.3596	1.25781
	1.2251	1.10079
	1.5	1.30839
	1.10294	1.19398
	1.3825	1.14073
	1.23451	1.55708
	1.28856	1.3952
	1.31967	1.42297
	1.31935	1.44362
	1.28963	1.23144
	1.22139	1.27969
	1.5	1.49498
	1.42628	1.26161
	1.33747	1.30769
	1.19502	1.30579
	1.40174	1.34331
	1.31489	1.37588
	1.34112	1.36538
	1.46512	1.31064
	1.18441	1.09672
	1.24403	1.2768
	1.54565	1.32283
	1.13239	1.33309
	1.45808	1.20853
	1.29469	1.31351
	0.980769	1.48808
	1.25478	1.36441
	1.22887	1.21924
	1.34934	1.44926
	1.20458	1.53724
	1.31813	1.22859
	1.29241	1.39271
	1.39617	1.17492
	1.29872	1.22484
	1.44396	1.43898
	1.2871	1.33198
	1.25208	1.3006
	1.06881	1.38202
	1.08729	1.34091
	1.40482	1.31696
	1.28597	1.10506
	1.30392	1.19098
	1.31935	1.27636
	1.37691	1.47546
	1.25217	1.48347
	1.35028	1.07105
	1.34014	1.38641
	1.32922	1.40249
	1.33333	1.38567
	1.43117	1.3122
	1.29342	1.14776
	1.17568	1.37599
	1.25485	1.35354
	1.29283	1.24873
	1.34339	1.3729
	1.41608	1.28995
	1.52211	1.37646
	1.43673	1.2987
	1.33916	1.54484
	1.24717	1.50045
	1.32955	1.26686
	1.34783	1.43837
	1.26523	1.36187
	1.27083	1.29451
	1.32861	1.25826
	1.24734	1.11202
	1.44105	1.32438
	1.44685	1.1401
	1.44894	1.05374
	1.30551	1.45769
	1.22454	1.14244
	1.23768	1.31401
	1.35199	1.32345
	1.23464	1.39983
	1.5	1.32515
	1.07617	1.40153
	1.2714	1.20093
	1.21769	1.23984
	1.53584	1.29098
	1.28205	1.18677
	1.41764	1.29167
	1.18894	1.31565
	1.33042	1.40545
	1.31447	1.28248
	1.27612	1.29462
	1.20487	1.3827
	1.2437	1.34618
	1.3534	1.28288
	1.24422	1.35343
	1.13991	1.37781
	1.22072	1.43572
	1.34689	1.30178
	1.26615	1.57828
	1.38976	1.4644
	1.27785	1.22693
	1.28469	1.26333
	1.3356	1.14775
	1.29977	1.34976
	1.31267	1.35343
	1.2644	1.34563
	1.47683	1.37579
	1.46939	1.45137
	1.34493	1.34013
	1.3848	1.37825
	1.35401	1.36332
	1.35645	1.31646
	1.32086	1.42722
	1.19104	1.48005
	1.14899	1.36246
	1.2877	1.29021
	1.40407	1.31837
	1.37622	1.30034
	1.26981	1.29331
	1.24783	1.30565
	1.23077	1.37299
	1.32941	1.36528
	1.35192	1.30125
	1.25988	1.32653
	1.34729	1.29266
	1.46743	1.32451
	1.36842	1.20701
	1.28596	1.51322
	1.44375	1.27678
	1.32666	1.2155
	1.3141	1.34187
	1.40044	1.36161
	1.3994	1.01872
	1.17188	1.33564
	1.37931	1.18209
	1.33133	1.18107
	1.31429	1.28746
	1.23009	1.24249
	1.35556	1.43555
	1.30088	1.29446
	1.25364	1.46432
	1.21891	1.25426
	1.15779	1.09858
	1.27885	1.39358
	1.32378	1.36488
	1.22059	1.52239
	1.2766	1.43177
	1.379	1.29226
	1.27744	1.4265
	1.29461	1.18798
	1.03936	1.30522
	1.27628	1.33013
	1.20131	1.36095
	1.37473	1.52745
	1.33105	1.41439
	1.12341	1.11494
	1.41519	1.16536
	1.24792	1.26181
	1.29278	1.30677
	1.36043	1.37353
	1.29412	1.30154
	1.36071	1.24101
	1.11234	1.27321
	1.34886	1.34764
	1.29569	1.54324
	1.375	1.37095
	1.43439	1.31785
	1.30375	1.21584
	1.34643	1.28762
	1.27032	1.26698
	1.3956	1.21368
	1.342	1.36622
	1.40568	1.46305
	1.23986	1.44456
	1.16743	1.43488
	1.28485	1.39613
	1.46787	1.35707
	1.35952	1.25146
	1.17137	1.28881
	1.31111	1.34533
	1.39572	1.36299
	1.17895	1.35577
	1.24352	1.33895
	1.38326	1.39336
	1.57457	1.29326
	1.19565	1.43447
	1.2	1.32939

## Sheet: Figure_S2C_Nup133_9b
Name	Nup133_9b_fed	Nup133_9b_starved
Median	1.25432	1.24751
First Quartile	1.18631	1.16509
Third Quartile	1.33527	1.34081
				ttest:
Data:	1.20107	1.2132		0.377383
	1.32848	1.37667
	1.22938	1.26401
	1.31559	1.10819
	1.26013	1.33993
	1.16438	1.13128
	1.18935	1.253
	1.22034	1.1475
	1.43288	1.29074
	1.23004	1.15227
	1.44317	1.1205
	1.23173	1.22493
	1.16949	1.10664
	1.44156	1.43768
	1.01647	1.16651
	1.38243	1.12709
	1.05895	1.19247
	1.28989	1.13693
	1.39565	1.15335
	1.31084	1.21853
	1.35861	1.38495
	0.983827	1.23886
	1.41616	1.40439
	1.23705	1.26331
	1.24083	1.44011
	1.14255	1.29716
	1.5	1.37008
	1.31585	1.42908
	1.1561	1.38204
	1.55062	1.27061
	1.19329	1.38648
	1.27262	1.11387
	1.25021	1.43683
	1.14388	1.21886
	1.16667	1.20643
	1.32194	1.15087
	1.1056	1.20869
	1.31875	1.06066
	1.13936	1.14801
	1.17391	1.15443
	1.30233	1.33185
	1.21909	1.21836
	1.15765	1.54098
	1.30942	1.2314
	1.45492	1.13073
	1.15466	1.37576
	1.25	1.47906
	1.36538	1.18906
	1.31818	1.13772
	1.27155	1.43495
	1.22584	1.1837
	1.23529	1.18337
	1.31913	1.10025
	1.24022	1.3746
	1.27847	1.52295
	1.13679	1.38668
	1.21106	1.13839
	1.31034	1.31481
	1.36703	1.37317
	1.28866	1.39242
	1.38991	1.22989
	1.28469	1.22999
	1.26644	1.31823
	1.29268	1.28571
	1.26872	1.38843
	1.20041	1.16206
	1.33408	1.35179
	1.3775	1.28978
	1.23822	1.47204
	1.25886	1.35467
	1.23505	1.32227
	1.18088	1.14646
	1.4878	1.25031
	1.25352	1.23855
	1.20833	1.41192
	1.39842	1.43166
	1.27151	1.25754
	1.20781	1.21314
	1.19064	1.44648
	1.34699	1.508
	1.28417	1.11504
	1.17663	1.28402
	1.28117	1.12601
	1.44582	1.08065
	1.33989	1.37299
	1.23198	1.00296
	1.32779	1.20751
	1.13051	1.18994
	1.18526	1.3
	1.20883	1.19746
	1.0661	1.02614
	1.26916	1.23114
	1.27366	1.12459
	1.3031	1.37031
	1.22246	1.23573
	1.29984	1.31395
	1.33015	1.36473
	1.26706	1.41188
	1.23883	1.48843
	1.2834	1.18182
	1.21442	1.33462
	1.51309	1.13603
	1.38314	1.19208
	1.38581	1.09417
	1.26437	1.24161
	1.16667	1.34791
	1.19057	1.24321
	1.22287	1.21307
	1.15681	1.31537
	1.27656	1.33795
	1.39247	1.22539
	1.27296	1.27324
	1.35893	1.34091
	1.40808	1.3089
	1.25385	1.24092
	1.33681	1.16252
	1.4543	1.18861
	1.25207	1.39789
	1.18777	1.29511
	1.18014	1.19309
	1.09925	1.40194
	1.36445	1.11052
	1.34462	1.15225
	1.20342	1.07943
	1.2619	1.24138
	1.39967	1.38448
	1.40783	1.30972
	1.31154	1.12684
	1.20492	1.52646
	1.43855	1.16133
	1.46154	1.37941
	1.13153	1.10271
	1.21142	1.08475
	1.28516	1.19959
	1.42905	1.35094
	1.2471	1.23948
	1.37197	1.29109
	1.08228	1.45887
	1.36111	1.29787
	1.15145	1.30907
	1.25052	1.31197
	1.46507	1.36795
	1.41335	1.34944
	1.33998	1.50773
	1.27582	1.30769
	1.04695	1.29907
	1.32923	1.31183
	1.2427	1.21244
	1.15278	1.24819
	1.09328	1.02119
	1.09642	1.264
	1.10921	1.1625
	1.4902	1.18807
	1.34499	1.16603
	1.12456	1.23482
	1.29192	1.13368
	1.23218	1.20225
	1.20987	0.892074
	1.16735	1.36652
	1.18421	1.46312
	1.1649	1.18163
	1.36415	1.25335
	1.23333	0.955301
	1.14078	1.32549
	1.36667	1.39149
	1.12919	1.10287
	1.25478	1.19703
	1.27292	1.04706
	1.34788	1.12778
	1.20213	1.41639
	1.2	1.1552
	1.14115	1.33594
	1.34113	1.10123
	1.02405	1.43852
	1.25536	1.41807
	1.25326	1.09829
	1.14583	1.26943
	1.38327	1.18717
	1.31163	1.17782
	1.30177	1.25505
	1.42373	1.19333
	1.4	1.10575
	1.16071	1.36883
	1.20064	1.25401
	1.0395	1.45321
	1.46691	1.10183
	1.35623	1.34489
	1.17367	1.26193
	1.30608	1.27441
	1.16576	1.03226
	1.32058	1.41047
	1.26497	1.13858
	1.18114	1.28788
	1.51282	1.25922
	1.21625	1.24684
	1.17103	0.997727
	1.23377	1
	1.27521	1.20663
	1.24238	1.46372
	1.19422	1.32543
	1.25	1.24478
	1.24231	1.29478
	1.32506	1.30769
	1.3377	1.25377
	1.3818	1.1888
	1.12241	1.47285
	1.20438	1.11049
	1.28856	1.26533
	1.34369	1.37928
	1.3026	1.31407
	1.06628	1.14511
	1.23417	1.3495
	1.22646	1.39504
	1.32979	1.32848
	1.13082	1.25563
	1.23196	1.29127
	1.23133	1.23138
	1.47688	1.23457
	1.33773	1.19807
	1.16327	1.24629
	1.2187	1.35518
	1.33333	1.19283
	1.3516	1.32172
	1.19048	1.304
	1.28952	1.26655
	1.12888	1.18258
	1.03012	1.07061
	1.10816	1.40103
	1.04487	1.23028
	1.34948	1.39718
	1.27273	1.24891
	1.40105	1.27214
	1.24744	1.26412
	1.27527	1.07784
	1.14629	0.979358
	1.18582	1.22194
	1.37707	1.33811
	1.23056	1.39552
	1.05344	1.03346
	1.10304	1.38136
	1.33962	1.22585
	1.37456	1.17169
	1.44947	1.27685
	1.27126	1.26176
	1.19288	1.34222
	1.30435	1.17886
	1.163	1.40026
	1.15488	1.3405
	1.2259	1.30739
	1.31719	1.18497
	1.08789	1.15486
	1.19183	1.26531
	1.36501	1.25182
	1.20974	1.16477
	1.20305	1.13459
	1.07296	1.27964
	1.11042	1.19641
	1.35165	1.39451
	1.24854	1.13873
	1.25976	1.0344
	1.32177	1.51667
	1.29583	1.22945
	1.20386	1.2112
	1.39858	1.25467
	1.41593	1.35515
	1.25736	1.30288
	1.48462	1.27108
	1.44526	1.32811
	1.16364	1.16316
	1.284	1.11771
	1.40446	1.13911
	1.16211	1.28264
	1.27033	1.30329
	1.11058	1.45912
	1.15789	1.24635
	1.42063	1.27038
	1.21758	1.10791
	1.25813	1.35405
	1.46786	1.21157
	1.14539	1.23169
	1.16064	1.12894
	1.25146	1.36095
	1.21228	1.3788
	1.16438	1.40884
	1.19856	1.24251
	1.31743	1.18328
	1.33529	1.09541
	1.20244	1.12544
	1.28005	1.19261
	1.34542	1.36707
	1.23709	1.205
	1.09104	1.07591
	1.36647	1.1944
	1.33372	1.20153
	1.33524	1.06413
	1.08333	1.10088
	1.15099	1.336
	1.15487	1.18149
	1.23119	1.19759
	1.27869	1.1415

## Sheet: Figure_S2D_Nup93_6
Name	Nup93_6_fed	Nup93_6_starved
Median	1.20534	1.18595
First Quartile	1.1424	1.11718
Third Quartile	1.25946	1.26014
				ttest:
Data:	1.22268	1.07814		0.0595848
	1.32053	1.07468
	1.0466	1.17407
	1.17874	1.18473
	1.27973	1.29309
	1.17452	1.10388
	1.15956	1.42683
	1.27451	1.02964
	1.14312	0.891675
	1.17596	1.36802
	1.24808	1.05863
	1.23165	1.12676
	1.20599	1.04932
	1.16943	1.17688
	1.34103	1.20369
	1.23558	1.02825
	1.26094	1.32349
	1.1258	1.37355
	1.23259	1.25449
	1.1239	1.28975
	1.28869	1.03332
	1.03811	1.16192
	1.18401	1.29978
	1.07904	1.21879
	1.16657	1.27561
	1.30992	1.32092
	1.09459	1.15719
	1.03933	1.14156
	1.20837	1.03252
	1.20435	0.968513
	1.24655	1.38389
	1.10413	1.08583
	1.22749	1.21209
	1.04745	1.17322
	1.27907	1.18186
	1.0772	1.02804
	1.21828	1.06867
	1.18071	1.28669
	1.30052	1.14215
	1.24969	1.31295
	1.25764	1.02907
	1.13903	0.930898
	1.05491	1.28035
	1.13002	1.23177
	1.10964	1.22754
	1.21116	1.21433
	1.08038	0.932624
	1.21076	1.14807
	1.20183	1.13224
	1.24824	1.32539
	1.3038	1.34091
	1.28655	1.20771
	1.16096	1.32239
	1.14481	1.22469
	1.17285	1.33211
	1.17864	1.16757
	1.20624	1.17458
	1.27981	1.19345
	1.0929	1.14455
	1.31256	1.27344
	1.22652	1.24746
	1.09516	1.16337
	1.18103	1.16414
	1.42885	1.15222
	1.3766	1.44867
	1.06656	1.26562
	1.32909	1.23434
	1.33159	1.30841
	1.20952	1.17716
	1.14129	1.29091
	1.06523	1.19003
	1.14496	1.13136
	1.32513	1.18502
	1.09709	1.26545
	1.07696	1.21361
	1.36925	1.24497
	1.23772	1.29436
	1.21299	1.18333
	1.24749	1.29815
	1.25719	1.1047
	1.31301	1.1675
	1.18788	1.17995
	1.28205	1.15799
	1.24072	1.33408
	1.0958	1.40365
	1.25968	1.05335
	1.28811	1.17931
	0.967311	1.31129
	1.11913	1.15621
	1.21188	1.16336
	1.17967	1.25825
	0.997414	0.936788
	1.22825	1.39328
	1.21433	1.14811
	1.12616	1.04597
	1.14629	1.08296
	1.35863	1.15127
	1.17986	1.17976
	1.29783	0.974607
	1.12954	1.38931
	1.34925	1.12484
	1.28679	1.11057
	1.1998	1.14159
	1.20799	0.994645
	1.21406	1.41813
	1.27917	1.01748
	1.20469	1.20241
	1.33652	1.1939
	1.12687	1.10432
	1.25091	1.24166
	1.19269	1.15155
	1.23864	0.936596
	1.23227	1.23189
	1.17519	1.06744
	1.22863	1.23597
	1.1249	1.10316
	1.17079	1.19911
	1.1881	1.19095
	1.25327	1.3557
	1.16143	0.907741
	1.24721	1.21907
	1.27163	1.28128
	1.10163	1.19572
	1.14449	1.09681
	1.29432	1.26109
	1.15368	1.10977
	1.32642	1.19595
	1.31774	1.16227
	1.36444	1.26825
	1.28767	1.18766
	1.24811	1.15563
	1.32325	1.32475
	1.23789	1.11943
	1.20807	1.00457
	1.14076	1.23607
	1.267	1.27522
	1.08463	1.32117
	1.28033	1.19597
	1.23	1.03851
	1.07804	1.15596
	1.13922	1.20186
	1.16279	1.12037
	1.2493	1.32669
	1.21716	1.27497
	1.23896	1.32127
	1.39683	1.22091
	1.03165	1.08995
	1.18777	1.16714
	1.09169	1.19328
	1.17051	1.16709
	1.30009	1.03196
	1.14249	1.2729
	1.15356	1.2103
	1.05473	1.22629
	1.25411	1.22279
	1.16543	1.18867
	1.14798	1.19919
	1.17066	1.13277
	1.34047	1.37631
	1.14215	1.21502
	1.07136	1.22753
	1.16279	1.111
	1.37122	1.10631
	1.20339	1.10246
	1.27107	1.22855
	1.33173	1.13188
	1.29823	1.18266
	1.22648	1.14295
	1.21348	1.13235
	1.21772	1.1359
	1.1223	1.16616
	1.16952	1.22235
	1.0543	1.34881
	1.34991	1.11436
	1.38455	1.09881
	1.16448	1.08806
	1.38922	1.27304
	1.4157	1.22229
	1.08524	1.13539
	1.28024	0.971089
	1.22946	1.31616
	1.13527	1.10368
	1.18626	1.18084
	1.25521	1.15538
	1.15512	1.14196
	1.20643	1.25305
	0.937644	1.38178
	1.31156	1.17508
	1.23773	1.23545
	1.22093	1.37867
	1.10258	1.12561
	1.27358	1.17391
	1.19051	1.22807
	1.1755	1.09154
	1.20146	0.975281
	1.23164	1.22695
	1.29178	1.12996
	1.21811	1.35982
	1.0722	1.1165
	1.14824	1.45575
	1.16651	1.17285
	1.10839	1.23437
	1.09452	1.27086
	1.13109	1.14563
	1.32063	1.21075
	1.24598	1.23473
	1.24967	1.33391
	1.14708	1.0865
	1.22075	1.13938
	1.21794	1.34702
	1.26482	1.23838
	1.3107	1.08015
	1.08189	1.22998
	1.16457	1.08447
	1.20923	1.36519
	1.10531	1.04035
	1.23481	1.09316
	1.1004	1.19962
	1.0834	1.09339
	1.23962	1.01268
	1.22528	1.31325
	1.15749	1.16049
	1.11926	1.28431
	1.19976	1.13199
	1.21794	1.28623
	1.26026	1.25273
	0.973039	1.16284
	1.24008	1.29264
	1.21195	1.20046
	1.19197	1.23477
	1.15561	1.13103
	1.18439	1.25793
	1.12725	1.29343
	1.12988	1.20289
	1.1926	1.31421
	1.16954	0.967233
	1.27665	1.18687
	1.14053	1.28452
	1.31429	1.29955
	1.14256	1.31646
	1.17355	1.12821
	1.19712	1.06197
	1.03686	1.24812
	1.23154	1.20714
	1.07912	1.24124
	1.10355	1.16267
	1.29698	1.26949
	1.12882	1.084
	1.24515	1.20753
	1.14237	1.05324
	1.18072	0.92564
	1.25882	1.31474
	1.26015	1.2925
	1.10823	1.35466
	1.31212	1.01194
	1.1737	1.17604
	1.10499	1.04522
	1.16062	1.3403
	1.22136	1.0882
	1.18079	1.14585
	1.12366	1.04361
	1.34937	1.28836
	0.922609	1.36933
	1.18819	1.05516
	1.36179	1.14463
	1.17201	1.00059
	1.09995	1.11922
	1.28211	1.25742
	1.24937	1.24372
	1.26015	1.22416
	1.07248	1.23662
	1.23551	1.16688
	1.3123	1.0319
	1.2851	1.08239
	1.26387	1.14575
	1.23579	1.22801
	1.25701	1.28035
	1.21117	1.29043
	1.12527	1.1836
	1.32067	1.12178
	1.16558	0.949254
	1.19225	1.03459
	1.20156	1.18694
	1.01366	1.16487
	1.31818	1.04867
	1.17009	1.17343
	1.26789	1.21542
	1.17973	1.09835
	1.16793	1.11354
	1.07902	1.06428
	1.39407	1.22633
	1.18476	1.26076
	1.05218	1.2091
	1.27287	1.2615
	1.23369	1.22444
	1.21557	1.35401
	1.09232	1.11522
	1.36401	1.1887
	1.2319	1.24518
	1.16465	1.23171

## Sheet: Figure_S2E_Nup58_6
Name	Nup58_6_fed	Nup58_6_starved
Median	1.01431	1.06443
First Quartile	0.956518	0.976785
Third Quartile	1.08424	1.14937
				ttest:
Data:	0.889262	1.12061		1.32264e-05
	1.02972	1.17641
	1.15495	1.05928
	0.899225	0.846552
	1.26904	0.937269
	0.918425	1.17123
	1.17932	0.951553
	1.13775	1.18837
	0.980349	1.13241
	0.913462	1.0156
	0.978261	1.1123
	1.03783	1.02273
	1.25778	0.99639
	1.00333	0.977887
	0.899772	0.811744
	1.19811	0.996678
	0.969419	1.34778
	1.08861	1.03
	0.897361	1.18273
	1.01657	1.13592
	1.00225	1.19259
	1.10338	1.14971
	0.95279	0.889752
	0.867327	1.10747
	1.0375	1.16843
	0.880734	0.980916
	0.955326	1.17476
	0.977027	0.998239
	0.95546	0.936842
	0.996637	1.09319
	0.998175	1.04846
	1.05164	1.12934
	1.00453	0.894811
	1.12356	1.20062
	1.11498	1.07745
	0.951104	1.11124
	1.22679	0.947811
	0.937407	0.904828
	1.12598	1.041
	1.00639	1.03244
	1.01894	1.34595
	1.07586	1.15491
	1.07441	1.0355
	0.931579	1.34106
	1.01816	1.08173
	1.10194	1.19597
	1.04139	0.970173
	0.917476	0.899371
	0.922741	1.22623
	0.968831	1.22049
	1.02999	0.873967
	1.12313	1.2063
	0.975504	1.03831
	1.13603	1.25503
	1.17511	1.17143
	1.06036	1.17056
	0.962229	1.13519
	1.07704	1.26244
	1.10074	1.14725
	1.08764	1.20588
	0.979094	1.11122
	0.944584	0.942263
	1.16063	1.11073
	0.979079	1.03974
	0.908275	1
	1.03805	1.01284
	1.01541	1.03886
	0.987129	1.16804
	1.03502	1.28343
	0.971033	1.02885
	0.762948	1.06831
	0.953662	0.974217
	1.06922	0.986592
	0.988722	0.995918
	1.0495	1.24084
	1.00264	1.10542
	1.00499	1.04236
	0.965976	0.895105
	1.21884	0.903587
	0.993614	0.968254
	1.0264	1.12528
	1.14286	1.0641
	1.09225	1.16796
	0.961616	0.914157
	0.938689	1.01949
	0.878505	1.09548
	1.08485	1.20592
	1.03439	0.972727
	1.22695	1.00988
	0.941781	0.761194
	1.03067	1.02525
	0.97526	0.99001
	0.943253	1.12736
	1.14029	1.16232
	1.16129	1.3453
	1.09337	0.871612
	1.02429	1.17002
	0.970043	1.25754
	1.22981	1.16964
	1.12956	1.21041
	0.822171	0.747405
	1.06082	0.920495
	1.27505	1.06634
	0.851005	1.09897
	1.03399	0.977273
	1.03909	1.18442
	0.981718	1.00754
	0.9225	1.02227
	0.989173	1.13358
	1.03175	1.10866
	1.0194	0.977702
	1.06916	1.12846
	1.01432	0.884058
	1.11951	1.06267
	1.08021	1.12588
	0.967447	0.878019
	0.866989	0.928771
	0.969586	1.08882
	0.998148	0.869963
	0.90073	0.934891
	0.998844	0.964722
	1.21237	0.969088
	1.09548	1.00896
	1.05125	1.07509
	1.26123	0.970537
	0.981793	0.963397
	1.07051	1.19426
	1.10673	1.04159
	1.13973	0.84495
	1.07361	0.939571
	0.809174	0.947589
	1.01935	1.11965
	1.30264	1.20993
	1.28647	0.95615
	1.09015	0.777344
	1.18969	1.14815
	0.995305	1.04852
	1.0179	0.909439
	0.931238	1.08186
	1.06434	1.00315
	1.08775	1.28385
	0.894231	1.30299
	0.836816	1.11725
	1.01966	1.06864
	0.914596	0.976693
	0.886646	1.03831
	1.08785	1.06477
	1.03448	1.02162
	0.898	1.08685
	0.946007	0.916775
	1.03019	1.17533
	0.864662	1.09102
	1.07749	1.01432
	0.991501	0.988796
	1.10149	1.02033
	1.01057	0.825043
	1.03011	0.955556
	0.875278	0.878788
	0.893591	1.08011
	0.987013	0.968652
	0.903546	0.88826
	1.08635	1.06696
	0.978934	1.22368
	1.0143	1.07507
	1.35994	0.860169
	0.994854	1.15574
	0.956023	1.15472
	0.967413	1.17292
	0.934307	0.91185
	0.964198	1.11546
	1.0914	1.09256
	1.09661	0.905282
	0.998912	0.9468
	1.14116	1.15765
	0.903319	1.0129
	0.958781	0.941243
	0.967908	0.919355
	0.934194	0.991803
	0.97422	1.05816
	1.11418	1.11765
	0.983313	1.13656
	0.990758	1.1223
	1.04321	1.10884
	1.16781	1.11092
	0.921893	0.993523
	1.04205	1.15821
	0.992826	1.0878
	0.938865	1.05472
	1.16919	1.00218
	0.956456	0.964427
	1.0447	0.977909
	1.15495	1
	1.00996	1.06901
	1.12011	1.17614
	0.973568	0.984765
	1.02648	1.11924
	0.942529	1.29338
	0.987041	1.20443
	1.06805	1.25422
	1.08381	1.18281
	1.0365	0.988032
	0.977912	1.05366
	0.965644	0.825397
	0.957292	1.27863
	1.04348	1.34349
	1.06191	1.12584
	1.04141	1.08254
	0.91712	1.03533
	0.965	1.1049
	1.16875	0.963693
	0.951708	0.879205
	1.0266	0.880691
	1.23156	1.04306
	1.01535	1.10018
	0.888889	0.973552
	1.12224	1.07532
	0.917282	0.994141
	1.05505	1.06592
	1.18093	1.00983
	1.04829	1.32672
	1.22857	1.041
	1.01321	0.953232
	1.00178	1.09635
	1.05276	0.976436
	0.690702	1.01226
	0.853965	1.07591
	1.06855	1.01567
	1.03498	1.03564
	1.05928	1.22828
	1.04762	0.891986
	1.14003	1.04115
	0.986692	1.16451
	0.956701	1.26598
	0.952577	0.8798
	0.964516	1.21015
	1.04057	1.16534
	1	0.99428
	0.876106	0.977064
	1.02534	0.837093
	0.931169	0.984863
	0.84858	0.981061
	1.0794	1.16157
	1.11008	1.07223
	1.08931	1.10174
	0.865651	0.944444
	0.949728	1.15839
	1.03894	1.01052
	1.15735	1.05172
	0.939665	1.13473
	0.952462	1.16175
	0.939673	1.11874
	0.885271	1.2122
	0.710468	0.887564
	1.10662	1.252
	0.954596	0.997647
	0.865526	1.28449
	1.2122	1.11669
	0.990396	1.10302
	1.05629	1.10769
	0.964687	1.0413
	0.966206	0.837563
	1.0322	1.09495
	0.984639	0.961116
	1.28337	1.23004
	1.04558	1.10506
	1.06222	1.1306
	1.16479	1.23272
	1.00663	1.32596
	0.977181	1.10068
	1.05952	0.957364
	1.01825	1.14835
	0.827763	1.10338
	1.10698	1.15268
	0.968912	1
	1.19351	1.02597
	1.22778	0.95935
	1.009	1.08029
	1.03886	0.963496
	1.05298	0.951289
	1.08438	0.988671
	1.25626	0.995754
	1.21472	1.14536
	1.0802	0.914286
	0.943841	1.06217
	1.13	0.900703
	1.00824	1.30982
	0.979973	0.916058
	1.00967	1.05055
	0.945534	1.10017
	0.860814	1.11715
	0.821739	1.22638
	0.996005	1.2037
	0.909256	1.1757
	1.05646	1.15676
	1.01133	1.21111
	1.20116	1.15376
	1.10714	1.14067
	0.914458	1.12127
	1.06026	0.962848
	1.00667	0.959391

## Sheet: Figure_S2F_Nup58_7
Name	Nup58_7_fed	Nup58_7_starved
Median	0.937493	0.977396
First Quartile	0.838495	0.921393
Third Quartile	1.03421	1.04266
				ttest:
Data:	0.822476	1.02073		3.18748e-06
	0.754464	0.925497
	0.774951	0.891641
	1.10541	0.920981
	0.592179	0.996815
	0.884783	1
	0.7751	0.998344
	1.00996	0.894144
	0.976378	1.0027
	0.982178	0.943452
	0.778471	1.11485
	0.933162	1.03443
	0.695707	0.97527
	0.953457	1.11708
	1.02507	0.909677
	0.876513	1.01429
	1.32149	1.03337
	0.827519	0.877095
	0.75082	0.866492
	0.99679	1.01152
	1.02289	0.980728
	1.00885	1.04704
	0.752784	1.09013
	0.724609	1.00582
	1.18492	1.26812
	1.04348	0.928962
	0.785203	0.973529
	1.1661	0.977215
	0.939583	1.01535
	1.0624	1.07547
	0.875747	0.956318
	1.01288	1.01944
	0.96281	0.922628
	1.11527	0.847909
	0.690058	1.05128
	0.841328	0.956063
	0.789337	1.06897
	0.947548	0.954545
	1.008	1.0077
	1.06414	1.05967
	0.941558	1.05336
	0.716942	1.01675
	1.04209	0.939103
	0.934412	0.998464
	1.14429	0.932353
	0.766667	1.17722
	0.963007	1.05295
	0.812842	0.862637
	1.06528	0.977547
	0.92967	0.994071
	1.07455	0.968476
	0.853763	0.980159
	0.935537	0.964059
	0.83677	0.917108
	1.00177	1.05009
	0.822342	0.941281
	0.937916	0.904051
	1.0547	0.95814
	0.744035	1.00329
	0.979899	0.84375
	0.835329	0.975647
	0.838188	1.01718
	1.0655	1.025
	0.881379	0.958929
	1.04908	1.22879
	1.03917	0.941176
	0.908766	0.8379
	0.780083	1.00951
	1.06583	1.19238
	1.11058	1.0639
	0.928747	0.989669
	1.12517	0.868512
	1.14594	1.03187
	0.858586	0.97019
	1.01107	0.797203
	0.732014	1.02642
	0.932018	1.10688
	0.820988	1.03544
	0.963489	1.10264
	0.937843	1.07071
	0.854871	1.03971
	0.891304	0.95858
	1.19565	0.944444
	1.00843	0.902778
	0.772541	0.730018
	1.0343	0.93239
	0.976087	0.929389
	0.671031	0.990521
	0.977891	0.983003
	1.02559	0.856037
	0.906849	1.0148
	1.17134	0.929577
	0.919178	0.899648
	1.00424	0.969305
	0.73852	0.900164
	0.890805	1.00876
	0.887955	1.06415
	0.826025	1.0377
	0.90313	0.774457
	0.94837	0.94898
	0.801258	0.962733
	1.25686	0.79878
	0.926852	1.04391
	0.918203	0.891207
	1.07386	0.896057
	1.02037	0.94721
	0.80865	1.19146
	0.921363	0.868304
	1.03552	0.804841
	0.781208	0.803483
	0.930723	1.12077
	0.861472	0.946667
	1.01739	0.982262
	1.04112	0.916176
	0.975439	1.08067
	1.02997	0.735703
	0.953596	0.993197
	0.791762	0.930046
	1.31822	1.02837
	0.664165	0.978346
	0.800613	0.915212
	1.1034	0.680089
	0.879208	0.842105
	0.889019	1.10284
	0.878378	0.939241
	1.03396	0.85342
	0.898305	1.08902
	0.785106	1.04532
	0.875719	1.11167
	1.08399	1.03514
	0.850891	0.930108
	0.772469	1.04303
	1	1.02125
	1.14202	1.05431
	0.987919	0.984375
	0.968553	1.06028
	0.737548	1.05676
	0.86106	1.00121
	0.932127	0.908665
	0.904812	0.873589
	0.817323	1.27594
	0.964438	0.855019
	1.0394	0.93621
	1.07588	1.20562
	1.12621	1.09753
	0.708609	0.990115
	0.934817	0.975852
	1.08355	1.00645
	0.706557	0.918164
	0.969194	1.20323
	0.857422	0.984211
	0.786184	0.965079
	0.928429	0.931452
	0.895299	0.923715
	0.930994	1.02373
	1.08539	0.959916
	1.17361	0.90595
	0.863568	1.1087
	0.932819	0.918006
	1.037	0.944444
	0.92809	0.945946
	0.843687	0.949597
	0.862857	0.943534
	1.03586	1.08357
	0.828473	0.945283
	0.880368	1.04754
	0.978541	1.14173
	0.905237	0.815359
	0.939971	0.943689
	1.06462	0.852605
	1.04979	0.934978
	0.88024	1.00153
	1.0075	0.911076
	1.05132	0.925547
	1.08611	0.891648
	0.777457	0.961126
	0.894624	0.950693
	1.15466	0.923538
	0.984581	1.11675
	0.903158	1.04082
	1.022	0.901487
	1.11438	1.07683
	0.814925	1.0411
	0.97219	1.14562
	0.954936	1.13669
	0.770642	0.891616
	0.689747	0.88746
	0.946593	0.980363
	0.900415	1.10058
	1.1866	1.05052
	0.998955	0.94332
	0.87193	1.04828
	1.08285	0.918644
	0.86215	1.10992
	0.8064	1.05017
	1.32524	1.04513
	1.10127	1.00348
	1.14442	0.985737
	0.775963	1.14653
	1.05987	0.998347
	0.936735	1.10051
	0.962396	0.920721
	1.01524	0.894737
	0.784091	1.11681
	1.07376	0.866516
	1.09854	0.95045
	1.16031	1.05505
	0.96063	1.0387
	0.750446	1.04114
	0.873747	0.948661
	0.839416	0.840824
	1.09104	0.907343
	1.06804	1.12741
	0.752515	1.04406
	0.947771	0.815416
	0.777452	1.0896
	0.81363	1.04731
	0.889961	1.17549
	0.989779	1.0967
	0.916944	1.05323
	1.02413	1.34426
	1.12437	0.823138
	0.938331	0.867052
	1.0323	1.01527
	0.818418	1.13786
	1.10207	0.897436
	0.811723	0.997845
	0.693034	1.16558
	0.959524	0.956182
	0.767391	0.861364
	0.846154	1.11644
	0.976886	0.825073
	0.805344	0.997214
	1.01657	0.925816
	0.957661	1.0233
	0.964912	0.971875
	0.885794	0.94032
	0.940299	1.10855
	0.795824	0.855769
	0.88961	0.899554
	0.869249	0.952239
	0.793867	0.945017
	1.03727	0.967647
	1.03395	1.00189
	1.10714	0.898182
	1.01418	0.991367
	0.847134	0.911602
	0.957025	1.19024
	1.00579	0.907407
	0.938967	1.00569
	0.709619	0.987374
	0.959596	1.04167
	1.06263	0.878669
	0.78937	0.977244
	1.01515	1.03692
	1.10137	0.935841
	0.80574	0.906383
	1.06791	0.981744
	0.807018	1.00288
	0.92707	1.04054
	1.15873	0.897695
	0.944751	0.94577
	1.04615	1.01554
	1.07919	1.03519
	0.907168	1.01202
	0.77972	0.972603
	0.941292	1.01524
	1.02346	0.82
	0.993348	0.917986
	0.980519	0.932836
	0.932609	0.825
	1.1338	0.969748
	0.880303	1.0305
	0.928664	0.855469
	0.93456	1.22316
	0.77661	0.963478
	1.12338	0.962891
	1.13237	1.03382
	0.7872	0.941679
	1.11468	1.08108
	0.827901	0.924615
	1.10127	0.941379
	0.769524	0.932584
	0.673203	0.885621
	1.03711	1.20918
	0.811141	1.01835
	0.826357	0.823656
	0.823423	1.06235
	1.02727	0.932053
	0.869505	1.19403
	0.995575	1.04299
	0.865535	0.970037
	1.06292	0.817427
	0.786863	0.902755
	0.916883	1.04808
	0.906195	0.828947
	0.910284	0.89697
	0.937143	1.0059
	1.20871	1.11429
	1.05066	0.936667

## Sheet: Figure_S2G_Nup54_494_1
Name	Nup54_494_1_fed	Nup54_494_1_starved
Median	1.71813	2.0292
First Quartile	1.55223	1.87765
Third Quartile	1.89599	2.17379
				ttest:
Data:	1.23553	1.57253		2.21765e-40
	1.47092	2.08782
	1.33409	2.25022
	1.39299	2.17116
	1.89627	1.90678
	1.80196	1.98004
	1.89961	1.74612
	1.70575	1.84837
	1.94451	1.53461
	1.60518	2.10498
	1.68869	1.63418
	1.71652	2.10721
	1.53796	2.06213
	1.73118	2.07781
	2.27899	2.19853
	1.37919	1.63978
	1.38946	1.76625
	1.58824	2.1332
	1.73129	1.76081
	1.55139	1.39441
	1.48079	2.50166
	1.67224	1.87683
	1.3043	1.89048
	2.02867	1.92157
	1.71828	2.21077
	1.89412	2.24065
	1.42397	2.13109
	1.72464	2.3135
	1.15702	1.96377
	1.58006	1.76014
	1.43978	2.42082
	1.6867	2.13109
	1.97674	2.00569
	1.55224	2.14951
	1.80565	2.01831
	1.78398	1.61503
	1.53036	1.78868
	1.97477	1.66
	1.60436	2.07645
	2.16754	1.95737
	1.57937	2.01464
	1.58384	1.96818
	1.61426	1.97513
	1.50215	1.57006
	1.38921	1.98333
	1.58581	1.71682
	1.96333	2.03936
	1.49264	2.0954
	1.80385	2.3138
	1.59073	1.99856
	1.71205	1.75275
	1.4241	2.30667
	1.6568	2.02409
	1.52386	2.12731
	1.70873	2.21598
	1.38453	2.12759
	1.50911	1.8429
	2.12992	2.27637
	1.92787	2.11506
	1.95597	1.73429
	2.01648	2.32944
	2.0324	2.01336
	1.31206	2.1624
	1.68333	2.11944
	1.35578	1.92512
	1.70956	2.01209
	1.7577	1.974
	1.43913	2.23087
	2.05057	2.05036
	1.95359	1.81191
	1.8657	2.06353
	1.44766	2.05187
	1.51297	1.88013
	1.48629	2.10616
	1.74213	2.18369
	1.69727	2.25452
	2.0707	2.26405
	1.78081	1.9626
	1.375	2.20863
	1.61264	2.41082
	1.75204	1.65674
	1.58045	1.88294
	1.6101	2.03514
	1.75786	2.27586
	1.33212	1.53706
	1.77316	2.07206
	1.94091	2.17615
	1.87569	1.81935
	1.33819	2.10182
	2.08915	2.14722
	2.14026	2.03219
	1.67678	1.67702
	1.88056	1.79026
	1.53915	1.92765
	1.84995	1.96944
	1.68465	2.00902
	1.50503	1.90662
	2.04736	2.42985
	1.47243	2.18004
	1.64462	2.25257
	1.54229	1.82049
	1.93685	2.3623
	1.67194	2.05493
	1.75996	2.30868
	1.74452	1.91979
	1.72667	1.40281
	1.72795	1.55385
	1.90093	1.93444
	1.44585	2.18729
	1.82649	2.07946
	1.68584	2.03155
	2.29754	2.00191
	1.5996	2.10696
	1.72979	1.94221
	1.89515	1.9955
	1.83247	2.33976
	1.63383	1.63801
	1.82492	1.95798
	1.80463	2.0971
	1.35739	2.15833
	1.57328	1.86676
	1.46615	2.01135
	2.19905	2.09233
	2.07348	2.26565
	1.86131	1.89582
	1.73626	2.29897
	1.60159	1.49012
	1.85943	2.22295
	1.23232	1.89286
	1.56475	2.05072
	1.75673	2.01571
	1.4391	1.9081
	1.75752	2.32664
	2.16242	1.97989
	1.80244	2.24595
	1.72333	2.1201
	2.01313	2.17836
	1.57371	2.06679
	1.63065	2.02097
	1.51222	2.35115
	1.78816	2.29808
	1.89706	1.81764
	1.76249	1.88596
	1.84706	2.27635
	1.68775	2.03846
	1.36026	1.83403
	1.68946	1.93553
	1.93713	2.34626
	1.7265	1.97407
	1.61098	2.09552
	1.8419	2.13496
	1.70152	1.8729
	1.55223	1.8238
	1.87311	2.20019
	1.63356	2.2766
	1.37751	2.15211
	1.92168	2.09173
	1.68788	1.55822
	1.57234	2.14032
	1.84004	1.31422
	1.9409	1.7866
	1.99437	2.24517
	1.79437	1.98573
	2.04537	1.98176
	1.52692	1.61817
	1.94492	2
	2.04348	1.84552
	1.7574	1.89249
	1.89384	2.25691
	1.75921	2.40659
	1.65771	1.98373
	1.50367	1.92706
	1.71329	2.30991
	1.74365	1.90942
	1.92428	1.92075
	1.804	2.0607
	1.94789	2.12864
	1.90265	2.03679
	2.11622	2.12639
	1.499	2.09064
	1.97968	2.465
	1.3935	1.73538
	1.54977	1.52244
	1.64325	2.03409
	1.9704	1.54146
	1.78068	1.90018
	1.26087	1.8199
	2.01313	2.00367
	1.73797	2.14669
	1.47807	2.17723
	1.92815	2.02111
	1.46429	1.91304
	1.76841	2.03075
	1.62894	2.29144
	1.73132	1.29918
	1.96983	1.52759
	1.92163	2.04026
	1.87716	1.45277
	1.56401	1.84234
	1.43547	1.94258
	1.87616	1.58168
	1.88545	1.83112
	1.78981	1.85089
	1.79942	2.21236
	1.45631	2.3588
	1.686	1.76375
	2.20036	1.96013
	1.68834	1.95322
	2.08096	2.24365
	1.69231	2.23016
	1.4719	2.07016
	2.10995	1.8125
	1.65462	1.53527
	1.80496	2.02056
	1.92119	2.27948
	1.43862	2.08381
	1.94676	1.92903
	2.21757	2.02766
	2.15108	2.06036
	1.86647	1.63147
	1.62402	2.05096
	1.96344	1.79104
	1.49469	1.85714
	1.76488	2.30042
	1.64581	2.10293
	1.61175	1.81101
	1.67523	1.78764
	1.58741	2.20311
	1.84852	2.07846
	1.85666	2.0724
	1.81018	2.21501
	1.50161	2.07854
	1.67915	1.52171
	1.84111	2.37713
	1.647	2.35412
	1.79094	1.72284
	1.71795	2.35373
	1.73684	2.066
	1.87232	2.33654
	1.62872	1.91512
	1.4707	1.63298
	1.35504	1.9293
	1.52826	2.07274
	1.46431	2.16459
	1.72107	2.13204
	1.9012	2.35501
	1.70069	2.16735
	1.5477	1.76178
	1.60967	2.29089
	2.09253	1.34132
	1.55526	2.21657
	1.40768	2.02088
	1.72024	1.57895
	1.53049	2.22405
	2.3917	1.98625
	1.55499	2.2042
	1.91772	1.94313
	1.68203	2.17642
	1.91194	1.85996
	2.1125	1.74492
	1.90552	2.06709
	2.02313	1.91056
	1.42928	1.42591
	2.38425	2.28444
	1.98848	2.13361
	1.77606	1.91732
	1.58068	2.16388
	1.46018	2.06176
	1.60329	1.91601
	2.02897	1.82111
	1.64217	1.56804
	1.76565	1.99501
	1.56849	1.66667
	2.19388	2.06438
	1.77959	2.19323
	2.0411	2.19313
	1.3753	1.88655
	1.47752	2.06412
	1.43991	2.42687
	1.42885	2.00923
	1.94132	2.11311
	1.66342	2.17466
	1.68458	2.3015
	1.99316	1.90137
	1.60349	2.40397
	1.59959	2.06472
	1.71798	1.91126
	2.40852	2.08518
	1.5286	2.19522
	1.94327	1.25943
	1.32606	1.87632
	1.93916	2.04475
	1.51174	1.79091
	1.86505	2.00862
	1.92878	2.28436
	1.87192	1.94405
	1.4152	2.43786
	2.27094	1.75615
	1.48022	1.97622
	2.04242	2.18255

## Sheet: Figure_S2H_Nup54_494_2
Name	Nup54_494_2_fed	Nup54_494_2_starved
Median	0.950892	0.96578
First Quartile	0.903403	0.920651
Third Quartile	1.00889	1.01205
				ttest:
Data:	0.793103	0.952471		0.113367
	1.05516	0.991534
	1.07346	0.905371
	1.00545	1.02657
	1	1.00351
	0.952349	0.895503
	1.02835	0.986925
	0.92186	0.804636
	0.985646	0.986854
	1.12705	0.982366
	0.93502	1.03044
	0.86244	0.990168
	1.01236	0.952562
	0.950546	1.15961
	0.853448	1.0025
	0.947165	1.01417
	0.91733	0.930233
	1.12214	0.921681
	0.957143	0.948266
	0.841439	0.898182
	0.970192	0.928571
	0.91947	0.956359
	0.933208	0.932952
	0.874222	1.04827
	1.08945	1.00283
	1.08041	0.872383
	1	0.989038
	1.01162	1.08477
	0.908427	0.878101
	0.84937	1.02
	1.0084	0.89817
	1.02339	1.01402
	1.08918	0.891411
	0.972727	0.917057
	0.95326	1.06411
	1.04083	1.13616
	0.970492	0.894603
	0.958881	0.832406
	0.905155	0.957698
	1.08117	0.950403
	0.920998	0.97772
	0.965922	0.922593
	0.911546	0.942118
	0.978202	0.977199
	0.955947	1.14243
	0.989273	1.01739
	0.90413	1.17502
	0.955461	0.874527
	0.806156	0.929196
	0.799314	0.915893
	0.920372	0.989577
	0.916215	1.09202
	0.894489	0.981672
	0.809071	1.01657
	1.03457	0.879219
	0.951259	1.01815
	0.883372	0.926459
	0.856115	0.974212
	0.875645	0.788199
	0.96529	1.04933
	0.919776	0.870682
	0.994125	1.03009
	0.940367	1.0121
	0.849779	0.864613
	0.948116	1.09129
	1.07834	1.02587
	0.883059	0.826327
	0.950166	0.969529
	1.08396	1.05392
	0.892294	0.897692
	0.926384	0.929364
	0.955593	0.941351
	0.882056	1.11676
	0.892279	0.972205
	0.927219	0.941103
	1.11616	0.972235
	1.06148	0.940163
	0.969262	0.977324
	1.00297	0.902285
	0.948553	0.905933
	0.997273	0.993717
	0.937536	0.829445
	0.877001	0.959711
	1.08719	0.957135
	0.953724	0.961446
	0.910151	0.976203
	1.03793	0.894384
	0.684898	1.14462
	0.964618	0.956624
	1.22759	1.00731
	0.953142	1.00047
	0.915287	0.986269
	0.969887	1.10161
	0.97359	1.02339
	1.03834	1.04482
	0.930348	0.888772
	0.903161	0.829421
	0.931931	0.96984
	1.10643	0.998894
	1.07934	1.0088
	0.954444	1.09228
	0.845123	0.942197
	0.99308	0.947435
	0.985849	0.961102
	0.853755	0.910251
	0.948624	0.864928
	0.943045	0.884348
	1.01654	0.990591
	0.985925	0.950237
	0.965541	1.09156
	0.852392	0.973367
	1.0194	0.87465
	0.886262	1.00725
	1.07867	0.875356
	0.88877	0.979757
	0.837421	0.932277
	0.882309	0.930014
	0.919745	1.05859
	0.96134	0.995889
	0.945946	0.954545
	0.932801	1.05357
	1.07008	0.994181
	0.995589	0.882564
	0.956746	0.98191
	1.01512	1.00806
	1.03193	0.95466
	1.05967	0.910939
	0.893566	0.891841
	0.870653	0.991578
	0.990062	1.00088
	0.83393	1.02957
	0.860167	0.845431
	0.957994	0.876066
	0.983063	1.05308
	0.919534	0.93717
	1.00851	0.963423
	0.909051	1.05409
	1.10408	0.916856
	0.844917	1.07304
	1.04022	0.980301
	0.959368	0.930421
	0.84077	0.938281
	0.968277	1.02196
	1.12887	1.08419
	1.067	0.914021
	0.965099	0.997428
	1.1898	1.05442
	0.853608	0.992398
	0.894799	0.998158
	0.923594	1.12973
	0.99313	0.969743
	0.90924	0.884477
	0.916327	0.844319
	1.04199	0.954256
	0.891611	1.00929
	0.986455	0.940217
	0.919881	0.906166
	1.22473	0.98696
	0.930036	0.886988
	0.956976	0.896653
	0.847534	1.02087
	1.00901	0.804982
	0.984627	1.01055
	0.791753	1.03844
	0.869859	0.934211
	0.905614	1.03975
	1.07516	1.03556
	0.893004	0.996078
	0.884168	1.09279
	0.997203	0.888078
	0.951138	0.964187
	0.934017	1.0942
	0.922695	0.962785
	0.930717	1.03075
	0.942334	1.01241
	0.884639	1.01293
	0.861835	1.05145
	1.06489	1.15425
	0.871681	0.866941
	0.879213	0.93265
	0.904734	0.949292
	0.85003	0.948753
	0.929673	0.902141
	1.06269	0.929616
	1.01778	0.942814
	0.889368	0.904272
	0.966275	1.05288
	1.1205	0.83667
	1.12807	0.96013
	0.930775	0.805895
	0.871778	0.974777
	0.884813	0.991551
	0.979029	0.983768
	1.01248	1.07977
	0.898726	0.92482
	0.83711	0.912077
	1.01685	0.975071
	0.899865	0.875962
	0.848425	0.895983
	0.81093	0.981459
	1.00153	0.966187
	1.0097	1.03845
	0.904135	1.03036
	0.947889	0.909506
	0.923415	0.986195
	0.908719	0.992997
	0.910223	0.987234
	0.837423	0.936955
	0.985522	0.938891
	0.782634	0.889443
	1.08856	0.9658
	0.916528	0.9305
	0.762428	1.07114
	0.916187	0.876219
	0.995349	1.11325
	0.868217	0.933819
	0.98677	0.959811
	0.953782	0.882803
	1.00374	1.11785
	1.06198	1.02434
	0.882258	0.951662
	0.901511	0.988636
	1.0448	0.920455
	1.07981	1.21281
	0.99309	0.962431
	0.921831	0.972707
	1.03419	1.12839
	0.930969	0.96099
	1.20608	1.16749
	1.05121	1.00377
	0.969504	0.960473
	1.0299	0.805447
	0.919524	1.02215
	0.922955	0.941627
	1.03084	0.948775
	0.882222	0.828313
	1.00805	1.00933
	1.02951	1.00511
	0.896572	0.977481
	1.07326	0.957237
	0.923977	1.00466
	0.97094	1.01192
	1.03892	0.931524
	0.929484	0.742257
	0.88457	0.96576
	0.978955	0.921241
	0.947514	0.977046
	0.998691	0.931053
	0.916623	1.2381
	1.00982	0.936829
	1.05206	0.912646
	1.06491	1.02393
	1.02673	0.981069
	0.881908	0.912224
	0.950646	0.90223
	0.965451	0.927674
	1.10598	0.886136
	0.979122	0.973004
	1.21474	0.946352
	0.995394	0.908306
	0.848131	0.925066
	0.873764	0.880583
	0.939714	0.937913
	0.853439	1.03009
	0.964243	0.875489
	0.789819	1.05273
	0.823009	0.894942
	0.931126	0.965801
	1.05927	1.02067
	0.959133	1.03406
	0.958978	1.00872
	0.993085	0.946891
	0.89971	0.972789
	0.949658	0.965184
	1.06341	0.963075
	1.04848	1.02309
	1.20558	1.03652
	1.12542	0.943723
	0.929134	0.860753
	0.939597	1.00482
	1.03884	0.966808
	0.954429	0.956876
	1.01654	1.02818
	0.942217	0.902288
	0.918903	0.931347
	0.979306	0.978168
	0.845321	0.840471
	0.908838	0.938429
	0.858294	1.00236
	0.921133	0.987556
	0.91358	0.938893
	1.01499	0.875486
	1.12826	0.860372
	0.992953	1.05465
	0.977285	1.02239
	0.912185	1.01788
	0.906582	0.979839
	0.947678	1.06721
	0.848968	0.910428
	0.89627	0.891509
