# Supplementary material for: Conformation of the nuclear pore in living cells is modulated by transport state
Source: eLife. 2020 Dec 21;9:e60654. doi: 10.7554/eLife.60654 (PMC7752133; doi:10.7554/eLife.60654)
Supplement: Figure 3—figure supplement 3—source data 1. [file elife-60654-fig3-figsupp3-data1.xlsx]

## Sheet: Figure3_S3A_N54noFG-mEGFP494(0)
Name	N54noFG-mEGFP494(0)_fed	N54noFG-mEGFP494(0)_starved
Median	0.971008	0.90293
First Quartile	0.934306	0.860763
Third Quartile	1.02965	0.965238
				ttest:
Data:	1.04438	0.941642		2.29623e-23
	1.06336	0.860153
	0.929894	1.02803
	1.14295	0.805522
	0.965077	1.11706
	0.938187	0.909292
	0.914015	0.780645
	0.95702	0.908681
	0.942272	0.879288
	0.936508	0.855867
	0.956923	0.836165
	0.865	0.852174
	0.945382	1.07015
	0.850685	0.915119
	0.923144	0.777933
	0.907063	0.888781
	0.936522	1.00174
	0.94081	0.87931
	0.909524	0.827731
	0.934783	0.911055
	1.0377	0.966546
	0.966377	1.01703
	0.952856	0.868786
	1.03448	0.878521
	0.955432	0.879965
	0.934198	0.878307
	0.904576	0.903156
	0.972689	1.10957
	1.09458	0.951269
	1.06806	0.859649
	1.0029	0.925541
	1.0159	0.825467
	0.947712	0.893064
	0.957611	0.869504
	0.963964	0.836081
	1.11507	0.920335
	0.886144	0.943425
	1.02857	0.884774
	0.905871	0.834813
	1.06716	0.891192
	1.05632	0.913876
	0.976689	0.944157
	1.02336	1.02546
	1.1	1.00917
	0.892992	0.9989
	0.919926	1.01722
	0.941336	0.889831
	0.936052	0.920455
	1.01071	0.906557
	0.98075	0.993234
	1.05144	0.900224
	0.912442	0.865734
	1.05381	0.885228
	0.89221	0.89013
	1.05398	0.876045
	1.01677	0.853904
	1.03878	0.844215
	0.960838	0.889441
	1.01168	0.88622
	0.813785	0.795256
	0.987315	0.930556
	0.933594	0.87463
	1.00886	0.976709
	1.04718	0.918248
	1.10668	0.974416
	1.00606	1.04747
	1	0.985507
	1.16525	1.08768
	0.821622	0.996757
	0.980533	0.813646
	1.01175	0.881292
	0.949695	0.919509
	0.892148	0.966061
	0.953603	1.01894
	1.01133	0.836193
	0.936975	0.956076
	1.04894	0.899207
	0.916553	0.855962
	0.972277	0.827907
	1.04718	0.889073
	0.916885	0.862069
	0.924848	1.09403
	0.923304	0.850656
	1.05022	1.06998
	1.03	0.981668
	0.981799	0.871191
	1.06645	0.85607
	1.0387	0.836111
	1.04858	0.883033
	1.08609	1.15443
	1.12491	0.912049
	0.941118	0.846632
	0.945629	0.871119
	0.974943	0.836196
	1.05459	0.78853
	0.990239	0.933839
	0.884534	0.822894
	0.951657	0.796825
	1.00534	1.02694
	0.925984	0.823529
	0.957327	0.847569
	0.991045	0.913931
	0.997442	0.84893
	1.00625	0.961005
	0.795192	0.976344
	1.04965	1.01843
	0.93159	0.980042
	0.976043	0.842917
	0.993548	0.94373
	0.955107	0.898734
	1.07195	1.11426
	0.867012	0.884892
	0.98411	0.825944
	0.965	0.856802
	0.924955	0.848537
	0.979592	0.959781
	1.09969	1.11749
	1.11642	0.885714
	0.993464	0.988565
	0.961297	0.868375
	1.0619	0.746522
	0.981553	0.904011
	1.09491	0.896072
	1.03817	1.04529
	0.898481	0.897716
	0.938723	0.873729
	0.996675	1.09982
	0.928867	0.814216
	0.942571	0.806024
	0.937639	1.04663
	1.05882	0.795427
	0.86529	0.803056
	1.00467	0.950873
	0.922366	0.986038
	1.05259	0.822197
	0.903191	0.932859
	0.816352	0.903315
	0.882576	0.915464
	0.914683	0.87782
	1.0227	0.952239
	0.938605	0.938596
	0.978599	0.768737
	1.04189	1.06139
	1.01183	0.90604
	1.06987	0.855162
	0.961104	0.792857
	0.974163	0.794964
	0.929273	0.787392
	1.03113	1.09002
	0.943599	0.960293
	1.00758	1.00211
	1.09655	0.779948
	0.943015	0.890085
	0.938967	0.965839
	0.979052	0.803069
	1.01689	0.862808
	0.959732	0.936527
	1.00987	0.954545
	1.05141	1.0194
	1.01046	1.02483
	0.961856	0.852406
	0.847525	0.846405
	0.96371	0.900572
	0.926428	0.984794
	0.912048	0.951378
	0.954974	0.897872
	0.963819	0.96763
	1.014	1.10594
	1.03417	0.860465
	1.16726	0.871537
	1.03685	1.125
	0.969543	0.870396
	1.0486	0.965455
	0.966387	0.888989
	0.997053	0.932159
	0.937604	0.902703
	1.05079	0.942105
	0.8722	0.99325
	1.09958	0.936869
	1.01604	0.964589
	1.04159	1.08812
	0.905997	1.07987
	0.994485	0.982456
	1.04074	0.919042
	0.94	0.875135
	0.896882	0.965662
	1.01422	0.924862
	0.912256	0.856936
	0.901342	0.926374
	0.899142	0.846381
	0.914824	0.901249
	0.92527	0.805243
	1.03851	0.834783
	1.02525	0.85809
	1.02128	0.934272
	1.07104	0.955994
	0.995997	0.883651
	1.03607	0.90241
	0.970398	1.01752
	0.929241	0.731003
	0.956923	0.919471
	0.977848	0.993612
	1.0428	0.906031
	0.906375	1.10702
	1.00146	0.973799
	1.05158	0.931102
	0.859307	0.862697
	1.0286	0.909392
	0.922607	0.885246
	0.993541	0.940705
	0.934629	0.981481
	0.935917	0.859579
	0.948427	0.950781
	1.01847	0.904181
	1.04725	1.0885
	0.928328	0.902372
	0.930369	0.895594
	1.00649	0.894509
	0.954064	0.82377
	0.971429	0.896951
	0.979006	0.846541
	0.965961	0.932007
	0.952569	0.948097
	0.949649	0.873358
	0.956571	0.872173
	0.953988	0.945819
	1.01345	0.915751
	0.907709	0.794074
	0.856322	0.893891
	0.916031	0.912178
	0.975416	0.886207
	0.910909	0.866559
	0.88642	0.882598
	0.869249	1.01842
	1.06534	0.934109
	0.871069	0.835749
	0.843227	0.870602
	0.963336	0.969146
	1.03164	0.915033
	0.929085	0.834739
	1.02514	0.872786
	0.984111	0.854422
	0.948012	0.860266
	0.894737	0.94204
	0.99917	1.0205
	1.03943	0.962825
	0.982095	0.822785
	1.05567	1.10268
	1.04928	0.945876
	0.955729	0.8509
	1.07042	0.933678
	0.889956	0.886968
	1.12363	0.807212
	0.931087	1.03337
	0.965304	0.879567
	0.966828	0.857888
	0.907354	0.869247
	1.01363	1.00997
	0.924051	0.921154
	0.997917	0.863818
	0.918062	0.959538
	0.96357	0.927813
	0.887295	0.80179
	0.903704	0.942017
	0.955457	0.861656
	1.02371	0.983016
	1.0776	0.855473
	0.926829	0.730159
	1.09778	0.90036
	0.94274	0.822306
	0.935484	1.03309
	1.08451	0.878733
	1.01194	0.961652
	0.938578	0.750611
	1.03834	0.921715
	0.946545	0.971429
	1.1152	1.00919
	0.948582	0.850127
	0.946226	0.866235
	1.02555	1.065
	1.13983	0.906748
	1.03017	0.891654
	1.07143	0.883929
	0.96976	0.888639
	1.06509	0.876232
	0.979592	1.00081
	0.907801	0.938385
	1.01537	0.894828
	1.01709	1.01833
	0.982949	0.994587
	1.04588	1.0614
	0.922862	0.89372
	1.03925	0.918552
	1.04196	1.06494
	0.938031	0.952593
	1.01358	0.97385
	0.953202	0.824971
	0.977459	1.03112
	0.943431	0.916667
	0.970588	0.920993

## Sheet: Figure_S3B_N54noFG-mEGFP494(1)
Name	N54noFG-mEGFP494(1)_fed	N54noFG-mEGFP494(1)_starved
Median	1.54083	1.73678
First Quartile	1.4593	1.60313
Third Quartile	1.62046	1.83813
				ttest:
Data:	1.4855	1.84395		9.2419e-41
	1.61111	1.58275
	1.74681	1.51966
	1.22027	1.13947
	1.60255	1.6052
	1.6	1.72373
	1.457	1.82048
	1.58407	1.87769
	1.58802	1.81343
	1.58736	1.7646
	1.59632	1.68648
	1.64837	1.53827
	1.78625	1.54597
	1.54925	1.84303
	1.54636	1.76513
	1.66159	1.66667
	1.53209	1.32368
	1.56606	1.54092
	1.54708	2.02089
	1.47206	1.69841
	1.83333	1.36015
	1.54123	1.67504
	1.50617	1.70389
	1.30498	1.686
	1.50274	1.88287
	1.59226	1.63833
	1.66748	1.92603
	1.56937	1.26951
	1.64648	1.81692
	1.63593	1.44183
	1.66061	1.73929
	1.34909	1.6124
	1.43639	1.73401
	1.58215	1.7684
	1.4961	1.46347
	1.23815	1.92901
	1.19868	1.52135
	1.59434	2.07231
	1.58009	1.82194
	1.2395	1.93197
	1.21624	2.01122
	1.56992	1.45421
	1.51844	1.56858
	1.57451	1.37603
	1.64464	1.78763
	1.63625	1.64352
	1.5985	1.22581
	1.56855	1.9294
	1.49191	1.52491
	1.50345	1.78441
	1.46078	1.77339
	1.62839	1.94191
	1.54456	1.8079
	1.69313	1.58463
	1.4132	1.46255
	1.58091	1.79747
	1.58395	1.86152
	1.25109	1.78691
	1.61662	1.68331
	1.38725	1.54839
	1.52816	1.90253
	1.5303	1.40187
	1.54875	1.84459
	1.68638	1.74011
	1.50771	1.5189
	1.37019	1.75948
	1.74832	1.78588
	1.47028	1.92435
	1.47256	1.53788
	1.65617	1.81922
	1.51833	1.75128
	1.64706	1.8137
	1.51674	1.67684
	1.1414	1.44307
	1.71011	1.89558
	1.52362	1.8678
	1.28479	1.83934
	1.52249	1.84906
	1.2475	1.70325
	1.66897	1.84887
	1.69686	1.65178
	1.74819	1.45898
	1.57229	1.90741
	1.66623	1.51653
	1.64302	1.82192
	1.46788	1.74109
	1.52875	1.82086
	1.59703	1.77467
	1.62342	1.50933
	1.42269	2.01546
	1.36489	1.87833
	1.47349	1.8368
	1.38169	1.58872
	1.22059	1.73026
	1.51632	1.59004
	1.67114	1.56293
	1.50077	1.81645
	1.48872	1.68349
	1.60536	1.89262
	1.58897	1.64306
	1.7202	1.75658
	1.33953	1.96978
	1.65288	1.71227
	1.51026	1.72043
	1.42052	1.68322
	1.58047	1.7433
	1.5616	1.1913
	1.5674	1.62969
	1.457	1.45461
	1.51711	1.95477
	1.74889	1.86641
	1.16643	1.87147
	1.62944	1.60322
	1.54264	1.78016
	1.425	1.44145
	1.59097	1.56627
	1.59668	1.89067
	1.42914	1.66396
	1.29596	1.78896
	1.68335	1.48206
	1.58568	1.42544
	1.34548	1.75
	1.5418	1.78049
	1.46572	1.78685
	1.51951	1.84151
	1.33722	1.94809
	1.64528	1.6031
	1.71508	1.85349
	1.64042	1.69663
	1.56087	1.77841
	1.50833	1.5586
	1.67717	1.78053
	1.41448	1.86467
	1.77649	1.84444
	1.29514	1.69181
	1.54044	1.76853
	1.47444	1.24404
	1.43699	2.04632
	1.27138	1.6129
	1.5007	1.4016
	1.48898	1.93708
	1.41153	1.80526
	1.55596	1.44788
	1.63343	1.89341
	1.45881	1.82532
	1.87926	1.68652
	1.60088	1.7613
	1.67448	1.57673
	1.68345	1.45128
	1.52038	1.70051
	1.5475	1.69379
	1.38087	1.49731
	1.66502	1.49835
	1.54229	1.75224
	1.57886	1.67692
	1.46756	1.47799
	1.63593	1.94785
	1.70444	1.92166
	1.6922	1.80971
	1.5159	1.79186
	1.74695	1.59179
	1.4325	1.63281
	1.35897	1.9085
	1.67956	1.68316
	1.51458	1.60452
	1.58357	1.69917
	1.53053	1.73427
	1.55014	1.94928
	1.73752	1.91351
	1.27724	1.73295
	1.70432	1.7175
	1.36738	1.68883
	1.65871	1.92355
	1.48963	1.8604
	1.34119	1.55674
	1.31658	1.67278
	1.47429	1.63131
	1.61818	1.59155
	1.54585	1.85613
	1.51822	1.9679
	1.54463	1.39592
	1.43292	1.96198
	1.34755	1.7469
	1.62545	1.60373
	1.55072	1.80622
	1.48069	1.52967
	1.51908	1.90771
	1.5786	1.76196
	1.31873	1.47158
	1.53261	1.46532
	1.45714	1.51551
	1.50323	1.94667
	1.43149	1.80811
	1.48481	1.82799
	1.59212	1.84759
	1.47458	1.79029
	1.56537	1.96944
	1.60144	1.86288
	1.61301	1.36911
	1.49293	1.56204
	1.51123	1.3045
	1.6193	1.83571
	1.49851	1.77027
	1.85106	1.73409
	1.37465	2.01392
	1.57817	1.43443
	1.57607	1.87457
	1.46896	1.73306
	1.2879	1.8331
	1.47109	1.50095
	1.53514	1.9517
	1.47595	1.89167
	1.55455	1.81046
	1.29792	1.69809
	1.5029	1.91091
	1.42991	1.72462
	1.61436	1.77577
	1.3695	1.67305
	1.6871	1.83856
	1.64869	2.03678
	1.62168	1.43427
	1.62204	1.96121
	1.35282	1.94895
	1.65816	1.69856
	1.32824	1.46979
	1.81222	1.40101
	1.52405	1.66144
	1.25383	1.94379
	1.78244	1.81501
	1.44128	1.60952
	1.8208	1.34828
	1.75445	1.48427
	1.38722	1.94402
	1.39031	1.69167
	1.70286	1.57453
	1.65362	1.78892
	1.61947	1.83352
	1.19833	1.69349
	1.5233	1.71515
	1.46096	1.45318
	1.52102	1.80975
	1.52632	1.72419
	1.52492	1.70318
	1.59927	1.82339
	1.63657	1.78002
	1.65278	1.82646
	1.45632	1.6174
	1.7761	1.922
	1.60889	1.9321
	1.47104	1.75784
	1.70183	1.87023
	1.6694	1.67391
	1.44126	1.79239
	1.5535	1.73107
	1.33227	1.91128
	1.36325	1.65746
	1.23486	1.97742
	1.497	1.80307
	1.53936	1.83477
	1.55207	1.98917
	1.57888	1.79234
	1.5477	1.60403
	1.52826	1.68013
	1.57143	1.70283
	1.42563	1.79847
	1.70403	1.77483
	1.47356	1.52669
	1.39792	1.91038
	1.52164	1.2765
	1.69157	1.75341
	1.45164	1.48605
	1.43112	1.83532
	1.6793	1.67243
	1.4893	1.61162
	1.50631	1.70706
	1.56745	1.67114
	1.5852	2.01305
	1.54039	1.60552
	1.28655	1.65749
	1.46078	1.53148
	1.51197	1.90401
	1.70999	1.85072
	1.45782	1.57044
	1.57008	1.86381
	1.49384	1.57913
	1.44788	1.82995
	1.52436	1.83683
	1.38245	1.80472
	1.70101	1.79401
	1.54783	1.70279
	1.74354	1.71118
	1.66584	1.56268
	1.57904	1.70169
	1.43004	1.58853
	1.64085	1.64269
	1.55126	1.81276
	1.62079	1.62021
	1.30359	1.80297
	1.54318	1.68571
	1.43802	1.45666

## Sheet: Figure_S3C_N54noFG-mEGFP494(2)
Name	N54noFG-mEGFP494(2)_fed	N54noFG-mEGFP494(2)_starved
Median	0.904974	0.910916
First Quartile	0.869147	0.864282
Third Quartile	0.951386	0.94988
				ttest:
Data:	0.911168	1.01519		0.393991
	1.00571	0.909699
	0.912195	0.854305
	0.926108	0.917746
	0.919856	0.863924
	0.910781	0.894366
	0.859748	0.998457
	0.884878	0.91951
	0.963271	0.945135
	0.899277	0.945284
	0.904427	0.941781
	0.853084	0.923017
	1.01711	1.0028
	0.91965	0.870061
	0.830199	0.948993
	0.854054	0.906166
	0.970019	0.920687
	0.939431	0.841159
	0.970472	1.02719
	0.976903	0.78413
	0.835388	0.921946
	0.844605	0.899371
	0.903226	1.00364
	0.826808	0.923681
	0.830752	0.887631
	1.03822	0.891734
	0.910842	0.846626
	0.898734	0.956999
	0.857402	0.982112
	0.861573	0.912381
	0.920863	0.989083
	0.807927	0.91117
	0.922502	0.861386
	1.10277	0.871653
	0.905728	0.94186
	0.940177	0.866949
	0.863971	0.875
	0.940308	0.841887
	0.846094	0.918919
	0.959422	0.963014
	0.912809	0.970385
	0.968017	0.867857
	0.966934	0.961151
	0.905308	0.925884
	0.892931	0.824468
	0.876754	0.903471
	0.891964	1.05688
	0.876639	0.866104
	0.898967	0.957306
	1.05148	0.843713
	0.899671	0.949393
	0.860302	0.82716
	0.932045	0.957991
	0.837745	0.959259
	0.85264	0.859899
	0.968234	0.922882
	0.864111	0.795556
	0.887303	0.870518
	0.890262	0.913853
	0.9496	0.900568
	0.893762	0.954208
	0.973988	0.870285
	1.0521	1.03498
	0.806349	0.981704
	0.933128	0.958333
	0.79397	0.881026
	0.917891	0.848905
	1.08063	0.973236
	0.855246	0.909396
	0.848372	0.859574
	0.984516	0.810723
	0.913771	0.834608
	1.0127	0.837572
	0.919255	1.01565
	0.898701	0.907816
	0.958289	1.04242
	0.869541	0.887789
	0.888569	0.862069
	0.849698	0.805869
	0.949669	0.911808
	0.872191	0.890411
	0.893504	0.818554
	0.989955	0.87634
	0.885918	0.912757
	0.879921	0.919103
	0.963031	0.954407
	0.892589	0.97
	0.938717	0.939167
	0.859323	0.886432
	0.809132	0.96595
	1.05435	1.10837
	0.950346	0.847697
	0.948472	0.885299
	0.88627	0.901474
	0.816014	0.793245
	0.84846	0.87472
	0.957869	0.974144
	0.869015	0.917347
	0.95362	0.902765
	0.854472	0.989568
	0.943902	0.861032
	0.913043	0.904588
	0.8606	0.984962
	0.929782	0.95621
	0.9274	0.860577
	0.910256	0.841341
	0.989083	0.926952
	0.966306	0.957677
	0.915493	0.859143
	0.893789	0.941176
	0.797478	0.950833
	0.938659	0.822972
	1.11426	0.907463
	0.937647	0.910663
	0.867439	0.935135
	0.827869	0.814332
	0.919881	0.872961
	0.976773	0.940263
	0.885279	0.854027
	0.897934	0.897978
	0.975981	0.865791
	0.908063	0.835809
	0.928149	0.881057
	0.918728	0.873797
	0.903537	0.975155
	1.00354	0.783505
	0.89695	0.844025
	0.832744	0.8277
	0.83454	0.842714
	0.942602	0.965784
	0.936323	0.946269
	0.866592	0.905172
	0.99322	0.853119
	0.964165	0.913793
	0.872902	0.956175
	0.867868	0.916061
	0.841832	0.915591
	0.834875	0.892183
	0.900646	0.885768
	0.915584	0.887368
	0.894552	0.882143
	0.844734	0.871567
	1.02417	0.88389
	0.861111	0.85
	0.95917	0.87976
	0.884347	1.01075
	0.975904	0.936156
	0.972806	0.851906
	0.978892	0.9223
	0.857143	0.85103
	0.978	0.911765
	0.981048	0.882175
	0.866972	0.9597
	0.888331	0.870085
	0.879047	0.827225
	0.880286	0.985946
	0.791696	0.882119
	0.891811	0.870313
	0.848849	0.927258
	0.986364	0.889474
	0.879402	0.931963
	0.926941	0.809706
	1.05521	0.981347
	0.84456	0.805849
	0.900205	0.975518
	0.93167	0.922947
	0.802189	0.807273
	0.912281	0.856655
	0.9259	0.826523
	0.942652	0.892188
	0.908261	0.968958
	0.850299	0.853705
	1.04049	0.863
	0.76049	0.939421
	0.899741	0.950061
	1.01253	0.927749
	1.00277	0.860772
	0.866995	0.905063
	0.948373	0.911504
	1	0.880526
	0.856216	0.805363
	0.810136	0.914172
	0.937383	0.875252
	0.845827	0.937759
	0.912584	0.916589
	0.897947	0.856204
	1.02813	0.851206
	1.0563	0.930868
	0.950082	0.940447
	0.923794	0.940645
	0.929902	0.905803
	0.870317	1.01694
	0.903965	0.950042
	0.93545	0.924543
	0.898486	0.947149
	0.916395	0.94198
	0.981017	0.876656
	0.867107	0.7925
	0.866778	1.00914
	0.885068	0.934718
	0.962543	0.964169
	0.893755	0.829032
	0.914032	0.854319
	0.877005	0.747881
	0.953922	0.989437
	0.945671	0.932595
	0.880402	0.822306
	0.94341	0.906367
	0.962895	0.903784
	0.899824	0.869301
	0.865546	0.852329
	1.09254	1.12389
	0.956364	0.954436
	0.907072	0.919355
	0.848071	0.991283
	0.928189	0.924154
	0.867359	0.957587
	1.05462	0.941117
	1.03509	0.787321
	0.910183	0.990484
	0.895967	0.991042
	0.937286	0.941176
	0.900575	0.877838
	0.958716	0.904295
	0.956753	0.883495
	1.0748	0.93401
	0.964671	0.855808
	0.888143	0.916399
	0.95406	0.853345
	0.815424	0.918717
	0.904641	0.970562
	0.974132	0.864144
	0.895937	0.965939
	0.927858	1.01005
	0.917637	0.876947
	0.979268	0.913043
	0.882487	0.856432
	0.825866	0.957292
	0.941416	0.771704
	0.885222	0.974984
	0.891096	0.920188
	0.901472	0.962145
	0.926102	0.93617
	0.975921	0.942799
	0.868478	0.880071
	0.865942	1.02383
	1.03738	0.936664
	0.889202	0.883106
	1.01277	0.845034
	0.898039	0.788514
	0.906419	0.935956
	0.742813	0.864693
	0.843803	0.993333
	0.868138	0.895067
	0.874386	0.990215
	0.866442	0.843434
	0.79183	0.857426
	0.915367	0.919955
	0.888325	0.877487
	0.80254	0.893487
	1.04745	0.810976
	0.986788	1.10545
	0.901639	0.914056
	0.895753	1.00773
	1.02656	0.891054
	0.892589	0.921708
	0.857959	1.01946
	0.858965	0.915038
	0.957967	0.984475
	0.887352	0.860979
	0.87831	0.976723
	0.946809	0.974038
	0.902287	0.875186
	0.834764	0.956889
	0.911742	0.774684
	0.879518	1.05806
	0.881374	0.934297
	0.902476	0.921527
	0.90676	0.876182
	1.01763	0.919574
	0.84587	0.913163
	0.950095	0.913428
	0.821907	0.849332
	0.982812	0.847364
	0.943945	0.845082
	0.944882	0.98218
	0.883562	0.899126
	0.87981	0.86124
	0.877968	1.04371
	0.970065	1.04276
	0.89316	0.90484
	0.81461	0.956557
	0.959763	0.882056
	0.899518	0.840892
	0.951733	0.885023
	0.956078	0.837545
	0.852964	0.923404
	0.867414	1.00163
	0.937919	0.92216
	0.933473	0.891787
