# Supplementary material for: Conformation of the nuclear pore in living cells is modulated by transport state
Source: eLife. 2020 Dec 21;9:e60654. doi: 10.7554/eLife.60654 (PMC7752133; doi:10.7554/eLife.60654)
Supplement: Figure 3—source data 1. [file elife-60654-fig3-data1.xlsx]

## Sheet: Figure3A_Nup133
Name	Nup133_8a_fed	Nup133_8a_starved
Median	1.00878	0.998556
First Quartile	0.959377	0.947777
Third Quartile	1.06481	1.07699
				ttest:
Data:	1.03594	0.925553		0.257403
	1.07692	0.984127
	0.971631	1.11166
	1.03383	0.813136
	1.00644	1.13947
	0.856897	1.02782
	1.29457	0.925778
	0.909408	0.987775
	0.880923	1.04139
	1.08095	0.876325
	1.25027	1.24545
	0.882353	0.955209
	1.11006	0.931979
	0.984043	0.952174
	0.957659	0.997024
	0.854772	0.872189
	1.17817	1.22159
	1.02833	1.00737
	1.09725	1.13494
	1.07056	0.988353
	0.954411	0.95082
	1.12635	0.936545
	0.981501	0.996198
	1.02358	0.980661
	1.01491	1.06937
	1.05544	0.978958
	0.979369	0.998665
	1.20481	1.07736
	1.17309	0.960327
	0.991174	1.13867
	1.06187	0.898113
	0.978142	0.9488
	1.1604	1.01075
	1.03086	0.901282
	1.04292	0.939571
	1.17482	0.837051
	1.01092	0.977169
	0.911616	0.966667
	1.06262	0.971347
	1.12439	0.894256
	1.04553	1.14873
	0.913089	1.06949
	1.08451	0.947826
	0.844671	0.982546
	1.00726	1.13469
	0.923274	1.19018
	0.985222	1.10049
	0.988178	1.08652
	0.95048	0.972
	1.07979	1.03353
	0.982405	0.931955
	1.0243	0.993902
	1.04741	1.07078
	0.934645	1.0275
	0.863551	0.858252
	0.940991	0.981027
	0.939677	0.909558
	0.986607	1.18584
	1.1679	1.10065
	1.19825	1.09371
	0.879902	0.933196
	1.08072	1.10861
	1.01722	0.990647
	1.02198	0.909653
	1.16585	1.19305
	1.04536	0.981318
	0.922353	1.1129
	0.849567	1.06322
	0.943802	0.985025
	0.863918	1.1087
	0.974635	1.03014
	1.0649	1.00896
	0.969866	0.901657
	0.969115	0.994247
	1.02099	1.00862
	0.945266	1.19775
	1.08972	0.964129
	1	1.00713
	1.14587	0.976909
	1.0086	0.96131
	0.970663	1.14566
	0.954142	1.07637
	1.13402	1.15348
	1	0.947761
	1.04199	1.04707
	0.960089	0.797034
	0.950514	0.865825
	0.998561	1.10539
	1.04076	0.989616
	0.939163	1.16872
	1.10547	1.06349
	0.970432	1.06186
	0.959009	1.11059
	1.04154	1.08997
	1.02278	1.01625
	1.04975	1.08476
	1.14444	0.868606
	1.03803	0.96378
	1.03614	1.01578
	1.05652	0.872186
	1.01652	0.975826
	1.04213	0.919954
	0.98018	1.00908
	1.03649	1.12953
	0.993934	1.06656
	0.870386	0.935882
	0.996486	1.05937
	1.01261	1.0392
	1.01026	1.08183
	1.00127	1.22527
	1.00785	1.07057
	1.3237	1.03304
	0.951863	1.01399
	0.928962	1.09923
	1.00417	1.08455
	1.05868	0.948803
	1.02081	0.933333
	1.04846	0.862016
	1.11757	0.893039
	0.908776	0.933815
	1.03616	1.03231
	0.980315	0.957655
	0.998645	0.948931
	1.09807	0.875486
	0.977316	0.931452
	1.04741	0.966777
	1	1.05492
	0.812373	0.844291
	1.09047	1.07853
	1.08638	1.01443
	1.10834	1.03081
	1.02271	0.975321
	0.993902	0.972789
	1.09115	1.02041
	1.00291	0.939431
	0.809693	0.922669
	0.904255	1.09613
	1.05364	1.11489
	0.933579	1.07775
	1.06804	1.04578
	1.02336	0.849013
	0.905109	0.896373
	1.08423	0.879699
	0.955288	0.931542
	1.15298	0.938894
	1.08006	0.901977
	1.03898	1.12525
	1.18863	0.907328
	0.997669	0.998447
	0.981723	0.970315
	0.845714	0.884861
	0.961538	0.982176
	1	1.13219
	1.01589	0.979145
	1.04009	0.948276
	1.05906	0.977434
	0.967078	1.05572
	0.978654	1.16654
	1.06091	1.11866
	1.23247	1.12118
	1.0839	1.04257
	0.948094	1.10703
	1.1762	0.979647
	0.907975	1.14646
	0.935354	1.24903
	0.954491	1.08195
	1.01966	1.13264
	0.965585	0.88848
	0.95914	0.982262
	0.939691	1
	1.10023	0.958182
	1.15058	0.988119
	0.823045	0.937112
	1.08842	0.965461
	0.895879	1
	0.964871	0.881269
	0.999178	0.897817
	1.30909	0.922481
	1.04514	0.921717
	1.00505	1.14937
	1.09737	0.973828
	0.979936	0.91612
	1.04495	1.00495
	1.08712	1.09082
	1.00896	0.992625
	0.911917	1.00428
	1.16693	0.981061
	1.01839	1.09462
	0.942099	1.09328
	0.943289	0.966042
	0.831707	0.978056
	1.0285	1.05387
	0.87846	0.994737
	1.04581	1.18017
	1.06608	1.01561
	1.15254	0.972935
	1.08018	1.12416
	0.990937	1.08525
	1.04116	1.09203
	1.0529	0.932948
	1.02473	1.01728
	1.09079	0.998765
	1.20506	1.07481
	1.02176	1.04784
	1.15948	1.04186
	0.812133	1.02042
	0.965451	1.06312
	0.989228	0.988152
	0.925214	1.11635
	0.964427	0.823666
	1.06456	1.15052
	1.0905	1.06602
	1.07348	1.00576
	1.06202	1.05547
	1.02811	0.958108
	0.961198	1.00458
	0.885057	1.00647
	1.12126	1.10598
	1.00593	1.11746
	1.05637	1.02172
	1.12088	0.937158
	0.893075	0.857895
	1.05693	1.06359
	1.05773	1.14241
	1.05511	1.03785
	1.04415	0.933258
	0.944989	1.08437
	0.922109	1.01559
	0.911862	0.884544
	1.00191	0.979781
	0.965381	1.24509
	1.08772	1.14641
	1.00173	1.18538
	1.10188	1.14114
	0.93018	1.06065
	1.18794	1.11368
	1.06346	0.996139
	0.962865	1.04701
	1.09804	0.866167
	0.934783	0.982397
	1.0222	1.01444
	1.23598	0.96
	0.970194	0.93705
	0.95416	0.96615
	1.0477	0.828839
	0.961322	0.915265
	0.839638	1.05485
	1.12919	1.0772
	1.13438	0.945157
	0.98057	0.98871
	1.03436	0.894075
	0.944306	1.01403
	1.11704	0.772834
	1.07789	0.926407
	1.02106	1.00238
	0.964607	1.01595
	0.945355	1.0722
	1.01562	1.01984
	0.985599	1.0069
	1.02603	1.09455
	0.963464	1.05935
	0.951023	0.962489
	1.01973	1.13623
	1.04502	0.979021
	0.89413	1.09843
	0.938959	0.952153
	1.07036	0.875824
	0.944018	1.16807
	1.12551	1.08743
	0.920465	0.966339
	1.05838	0.959666
	1.0495	0.949032
	0.996933	0.901207
	0.824411	0.858462
	0.918418	0.967573
	1.10201	0.897248
	1.00206	1.01603
	0.905523	0.85489
	0.9478	0.937672
	0.969674	0.965854
	1.15294	1.09077
	0.978261	0.998081
	0.991895	1.02021
	0.939869	0.996667
	0.967273	1.01493
	1.05337	0.912658
	1.00359	1.00706
	1.00707	0.875397
	0.987147	0.952919
	0.914921	1.08389
	0.960133	1.05172
	1.07001	1.10009
	0.967105	0.796107
	1.00108	1.00941
	0.952965	0.975
	0.97575	0.891262
	1.0958	1.12611
	1.11156	0.936285
	0.977644	0.973398
	1.12915	0.888668

## Sheet: Figure3B_Nup93
Name	Nup93_fed	Nup93_starved
Median	1.29848	1.29906
First Quartile	1.22347	1.22478
Third Quartile	1.36274	1.391
				ttest:
Data:	1.27523	1.29118		0.301202
	1.20593	1.40035
	1.13978	1.42297
	1.30257	1.41197
	1.29764	1.11669
	1.19549	1.34483
	1.30987	1.28823
	1.26931	1.22502
	1.29908	1.24595
	1.31236	1.29655
	1.30945	1.43694
	1.26046	1.33792
	1.3168	1.19768
	1.23588	1.27571
	1.25646	1.26324
	1.26081	1.30784
	1.3938	1.33166
	1.34268	1.09838
	1.49391	1.16359
	1.24752	1.44204
	1.43223	1.3756
	1.22076	1.49081
	1.53439	1.28508
	1.27834	1.23384
	1.23723	1.41471
	1.36075	1.27177
	1.29968	1.44607
	1.30169	1.25285
	1.34079	1.39422
	1.24194	1.50377
	1.45955	1.14205
	1.19536	1.13449
	1.17215	1.4089
	1.33333	1.40288
	1.31866	1.30688
	1.14876	1.33742
	1.46719	1.23289
	1.12041	1.16534
	1.57591	1.34031
	1.32716	1.34803
	1.31397	1.1865
	1.21049	1.14938
	1.42237	1.17166
	1.28312	1.29429
	1.35118	1.201
	1.30863	1.29238
	1.0657	1.09926
	1.33253	1.34525
	1.29323	1.43376
	1.25926	1.38554
	1.41967	1.23996
	1.08411	1.26316
	1.3338	1.46343
	1.27219	1.50063
	1.28153	1.21147
	1.42517	1.1999
	1.28356	1.32548
	1.22801	1.30089
	1.21385	1.15215
	1.29254	1.21486
	1.42415	1.345
	1.30878	1.31615
	1.39983	1.41382
	1.51199	1.38506
	1.34415	1.27479
	1.26333	1.3859
	1.36909	1.19916
	1.33109	1.29225
	1.34158	1.49979
	1.43599	1.44886
	1.27824	1.19476
	1.36302	1.34332
	0.976484	1.42558
	1.18332	1.30453
	1.14167	1.30383
	1.37078	1.17384
	1.54571	1.29339
	1.20631	1.28133
	1.27283	1.25884
	1.35174	1.2247
	1.12453	1.21896
	1.46659	1.37822
	1.36284	1.47162
	1.18662	1.22166
	1.30752	1.29948
	1.16074	1.28082
	1.36621	1.23537
	1.32681	1.25853
	1.37019	1.31456
	1.36315	1.44098
	1.3181	1.38131
	1.1742	1.51738
	1.36097	1.44774
	1.51899	1.49887
	1.33743	1.2719
	1.25879	1.26939
	1.46258	1.39968
	1.13323	1.47321
	1.32913	1.37924
	1.45366	1.23315
	1.36835	1.09903
	1.15574	1.36887
	1.36245	1.06787
	1.24333	1.3384
	1.21884	1.30999
	1.15853	1.37168
	1.20788	1.19414
	1.30658	1.47749
	1.26998	1.40179
	1.28788	1.3943
	1.29281	1.30874
	1.30041	1.54571
	1.29763	1.34134
	1.149	1.09586
	1.25024	1.4099
	1.25371	1.20019
	1.31782	1.44336
	1.3856	1.251
	1.10325	1.27642
	1.22534	1.37272
	1.27005	1.32513
	1.25456	1.34269
	1.36625	1.16667
	1.27895	1.33039
	1.22371	1.29863
	1.24115	1.35918
	1.32278	1.45357
	1.32205	1.39672
	1.27205	1.35622
	1.41121	1.33486
	1.19887	1.23847
	1.39082	1.2059
	1.06092	1.1465
	1.42205	1.45608
	1.22671	1.1727
	1.4961	1.25236
	1.22339	1.37454
	1.19735	1.53817
	1.23644	1.25279
	1.32134	1.23904
	1.45562	1.34481
	1.17403	1.36781
	1.32091	1.27448
	1.48732	1.19625
	1.23643	1.24135
	1.16836	1.23202
	1.38383	1.38347
	1.41628	1.30971
	1.36601	1.33304
	1.17893	1.26819
	1.47459	1.18939
	1.29953	1.10814
	1.19392	1.36489
	1.42884	1.23992
	1.41286	1.40913
	1.27463	1.38927
	1.36645	1.4124
	1.16705	1.27273
	1.30239	1.38944
	1.38825	1.23859
	1.41912	1.2303
	1.17458	1.40865
	1.26952	1.20584
	1.36368	1.43224
	1.25243	1.22133
	1.21832	1.33498
	1.18691	1.24337
	1.31094	1.2146
	1.18423	1.25326
	1.49848	1.24336
	1.17108	1.54489
	1.3518	1.42742
	1.31801	1.27545
	1.13586	1.26351
	1.28444	1.37399
	1.29192	1.40474
	1.3466	1.2914
	1.42657	1.52693
	1.2825	1.25689
	1.16323	1.59854
	1.26428	1.35165
	1.21931	1.38259
	1.5048	1.28534
	1.42665	1.26279
	1.15698	1.44952
	1.2762	1.34178
	1.34247	1.1144
	1.33976	1.46124
	1.59735	1.36398
	1.3101	1.24796
	1.20086	1.47997
	1.29438	1.15948
	1.54479	1.14505
	1.29935	1.07108
	1.27306	1.14395
	1.38612	1.19462
	1.18372	1.08198
	1.33062	1.49935
	1.29787	1.25407
	1.51974	1.18795
	1.25731	1.19406
	1.24115	1.4534
	1.22831	1.19568
	1.23707	1.24302
	1.17639	1.37918
	1.33704	1.35244
	1.12842	1.18058
	1.31453	1.17687
	1.41571	1.5115
	1.13801	1.11965
	1.3141	1.34546
	1.15204	1.29596
	1.33889	1.33062
	1.29748	1.24903
	1.29641	1.34813
	1.15921	1.40957
	1.16491	1.20132
	1.23522	1.27026
	1.23657	1.41935
	1.42882	1.44532
	1.37698	1.3513
	1.37449	1.48481
	1.49164	1.36311
	1.27774	1.45693
	1.11333	1.12906
	1.46913	1.2572
	1.06404	1.44977
	1.34542	1.29338
	0.962492	1.20306
	1.20793	1.10385
	1.32403	1.4161
	1.19435	1.25141
	1.25	1.32008
	1.36691	1.35732
	1.31271	1.22432
	1.26286	1.08126
	1.25494	1.2939
	1.19757	1.20083
	1.22104	1.35625
	1.31731	1.44016
	1.30463	1.22857
	1.18759	1.3774
	1.33945	1.21298
	1.35049	1.24717
	1.31907	1.25032
	1.30142	1.14099
	1.31983	1.28469
	1.34367	1.29861
	1.3277	1.42182
	1.37262	1.18137
	1.37765	1.3124
	1.11375	1.41955
	1.35654	1.36141
	1.30825	1.34131
	1.33579	1.0299
	1.07351	1.14577
	1.20486	1.43794
	1.25776	1.2381
	1.16864	1.40179
	1.37017	1.46722
	1.24809	1.34071
	1.13784	1.26947
	1.23295	1.42808
	1.32497	1.20971
	1.24659	1.42089
	1.28737	1.0731
	1.42495	1.37554
	1.26494	1.10315
	1.44487	1.32847
	1.30457	1.20691
	1.37485	1.46661
	1.39801	1.40535
	1.19464	1.29455
	1.15034	1.32116
	1.13448	1.10854
	1.34982	1.16763
	1.51078	1.23035
	1.24306	1.24646
	1.22475	1.44838
	1.19304	1.28091
	1.31495	1.27992
	1.35775	1.31114
	1.36771	1.12451
	1.30615	1.32851
	1.34043	1.30074
	1.27283	1.18265
	1.19809	1.27847
	1.44353	1.45305
	1.52049	1.39151
	1.15139	1.10283
	1.25317	1.1451
	1.15962	1.53446
	1.26878	1.44774
	1.19654	1.34044
	1.52638	1.18358
	1.39519	1.39595
	1.12734	1.17794
	1.39467	1.27861
	1.27302	1.09109
	1.38244	1.39596

## Sheet: Figure3C_Nup58
Name	Nup58_fed	Nup58_starved
Median	1.28504	1.17554
First Quartile	1.20663	1.05871
Third Quartile	1.3623	1.28719
				ttest:
Data:	1.12444	1.28336		8.72549e-18
	1.39007	1.16772
	0.949324	1.22403
	1.36675	0.829822
	1.26582	1.16637
	1.16364	1.09416
	1.21863	1.44444
	1.16194	1.3576
	1.12335	1.24587
	1.40858	1.17851
	1.5098	1.18841
	1.53147	1.17199
	1.10657	1.27945
	1.29179	1.3239
	1.59363	0.987864
	1.29355	1.46162
	1.36681	1.22738
	1.4534	1.17811
	1.30278	1.50205
	0.982587	1.24156
	1.27273	1.26374
	1.38813	1.32744
	1.26186	1.12145
	1.16607	1.05474
	1.30789	1.21521
	1.07617	1.31204
	1.26462	1.09437
	1.47798	1.32377
	1.50058	0.914543
	1.34477	1.13941
	1.07363	0.906486
	1.41245	1.35644
	1.23153	1.11845
	1.28276	1.24781
	1.07385	0.931818
	1.33158	1.28499
	1.3584	0.930057
	1.37688	0.94554
	1.34098	1.4702
	1.31031	1.27875
	0.885135	1.47694
	1.2974	1.02955
	1.18957	1.18416
	1.40196	1.108
	1.22429	1.30508
	1.22113	0.897858
	1.30456	1.16962
	1.20627	1.26483
	1.26034	1.25269
	1.24754	1.33537
	1.47727	0.953514
	1.29237	1.24665
	1.06941	1.0351
	1.34094	1.03985
	1.44479	0.885039
	1.28725	0.952607
	1.32696	1.09582
	1.27202	1.35201
	1.28289	1.01502
	1.22426	1.18931
	1.24704	0.964668
	1.30653	1.01056
	1.22654	1.2115
	1.31841	1.28534
	1.305	1.19868
	1.33676	1.21408
	1.28571	0.981651
	1.35038	1.24033
	1.25834	1.03122
	1.44018	1.31947
	1.37904	1.13717
	1.10283	1.29458
	1.33925	0.926535
	1.38021	1.00199
	1.34647	0.985891
	1.28218	1.15852
	1.27967	1.27941
	1.32077	1.37233
	1.33117	1.07447
	1.40104	1.26468
	1.29662	1.33268
	1.19124	1.11604
	1.4455	1.01651
	1.4347	1.07881
	1.24671	1.12455
	1.30631	0.950106
	1.29472	1.17575
	1.01411	1.20622
	1.49273	0.993097
	1.43147	1.01568
	1.19978	1.15701
	1.16746	1.18989
	1.49533	1.22129
	1.19557	1.47184
	1.26974	1.06408
	0.870588	1.1331
	1.32446	1.22979
	1.23165	1.10733
	1.34965	1.14604
	1.18393	1.29606
	1.2077	0.986301
	0.900222	1.10775
	1.27503	1.30753
	1.22075	1.29134
	1.41843	1.16759
	1.24747	0.952381
	1.33034	1.57261
	1.42362	1.31325
	1.26039	0.948624
	1.14417	0.91342
	1.14915	1.51334
	1.2507	1.20105
	1.25677	1.40678
	1.26814	1.12594
	1.30041	0.895642
	1.54007	1.40541
	1.26112	1.27934
	1.21907	1.04573
	1.22632	1.34898
	1.30494	0.986175
	1.18537	1.21805
	1.20789	1.01377
	1.35308	1.33679
	1.16409	1.02128
	1.11747	0.991597
	1.36732	1.27289
	1.3089	1.19921
	1.29464	1.1624
	1.37957	1.23619
	1.41544	1.05846
	0.932347	1.17532
	1.20325	1.34722
	1.32836	1.04452
	1.11161	1.18065
	1.3196	1.3082
	1.33388	1.23705
	1.23857	1.37368
	1.10182	0.979516
	1.33958	1.38068
	1.30884	1.08517
	1.42765	1.14958
	1.33247	1.28374
	1.50596	1.1
	1.3654	1.1006
	1.30761	1.28753
	1.18219	1.33564
	1.35116	1.16066
	1.14906	1.34722
	1.34459	1.34459
	1.26497	1.15728
	1.00555	1.08748
	1.40034	1.06983
	1.33452	1.03378
	1.2	1.28507
	1.27327	1.17754
	1.36553	1.25696
	1.20971	1.10825
	1.30905	1.24821
	1.22638	1.12849
	1.32058	0.909429
	1.35939	1.2996
	1.17102	1.1652
	1.09282	1.28122
	1.2576	1.33979
	1.29118	1.0127
	1.46379	0.973896
	1.44809	1.17532
	1.22939	1.18836
	1.18605	1.39239
	1.23904	1.38616
	1.19293	1.29293
	1.42516	1.42968
	1.32382	1.08473
	1.14949	1.3174
	1.34457	0.971388
	1.11523	1.13889
	1.32214	1.35835
	1.28436	1.45356
	1.28601	1.12645
	1.12289	0.964497
	1.17021	1.37882
	1.284	1.01969
	1.27318	1.4
	1.28007	1.36152
	1.21658	1.21569
	1.35887	1.24393
	1.18384	1.45978
	1.33739	1.09554
	1.20438	1.16407
	1.42276	1.45998
	1.21648	1.1531
	1.50196	1.05458
	1.36531	1.04958
	1.11515	1.16825
	1.60557	1.14346
	1.45661	1.03415
	1.1636	1.06815
	1.39744	1.2156
	1.1	1.11422
	1.0431	1.30585
	1.12229	1.24767
	1.34085	0.918794
	1.37112	1.0802
	1.18147	1.02552
	1.21259	1.13091
	1.35046	1.25237
	1.49651	1.28501
	1.31201	1.38942
	1.42875	1.00943
	1.19906	1.20342
	1.22591	1.05947
	1.07906	1.55
	1.36683	1.17373
	1.27867	1.23033
	1.26099	1.26528
	1.38254	1.16793
	1.399	1.4456
	1.48161	1.2321
	1.25689	1.09963
	1.41139	1.1105
	1.3156	1.15646
	1.26849	1.25711
	1.36327	1.16534
	1.4	1.25023
	1.25786	0.857143
	1.21228	1.40617
	1.32816	1.26132
	1.46875	1.02593
	1.30582	0.907873
	0.934087	1.18476
	1.2722	1.14062
	1.30055	1.07503
	1.28401	1.44213
	1.44308	1.32855
	1.06833	1.39625
	1.29293	1.32319
	1.10364	1.28616
	1.33742	0.901468
	1.42891	1.06073
	1.27459	1.16071
	1.24564	1.11604
	1.13564	1.16071
	1.26812	1.20638
	1.22374	1.25864
	1.45554	1.39422
	1.23217	1.00565
	1.32247	1.03118
	1.18636	1.09524
	1.47335	1.39265
	1.28711	1.04313
	1.52174	1.11594
	1.20806	0.938346
	1.18672	1.36332
	1.33175	1.26299
	1.15335	1.24673
	1.07471	1.37819
	1.24237	1.02376
	1.42173	1.37165
	1.19964	1.00473
	1.33473	0.924791
	1.33529	1.26358
	1.64894	1.20916
	1.1546	1.12685
	1.14719	1.37959
	1.40867	1.15997
	1.32805	1.15831
	1.49301	1.08126
	1.20022	1.42291
	1.39167	1.11026
	1.21269	1.04883
	1.21327	1.36597
	1.40038	0.931796
	1.22761	1.12291
	1.27	1.27366
	1.16508	1.15719
	1.31614	1.28355
	1.5287	1.271
	1.31288	1.00579
	1.18509	1.10265
	1.55274	1.33136
	1.17791	1.00334
	1.27743	1.38951
	1.08122	1.32927
	1.13839	1.01392
	1.23959	1.00769
	1.26758	1.21172
	1.50748	0.954733
	1.21706	1.1828
	1.35306	0.963147
	1.33765	1.05833
	1.27582	0.989858
	1.54221	1.43678
	1.06489	1.21241
	1.46719	1.17725
	1.27595	1.22948
	1.42819	0.975379
	1.02091	1.14674
	1.7	1.35802
	1.36653	1.39737
	1.00358	1.42727

## Sheet: Figure3D_Nup54_494
Name	Nup54_494_fed	Nup54_494_starved
Median	0.849973	0.79993
First Quartile	0.795084	0.737369
Third Quartile	0.912001	0.853195
				ttest:
Data:	0.928004	0.710573		6.61756e-08
	0.898252	1.28257
	0.904344	0.692875
	0.947624	0.807965
	1.10319	0.86099
	0.856174	0.91676
	0.94382	0.838798
	0.799414	0.829268
	0.740423	1.15458
	0.791826	0.763636
	0.872391	0.85478
	0.845507	0.840818
	1.00606	0.722554
	0.794003	0.944027
	0.915543	0.760123
	0.911723	0.794721
	0.947443	0.846843
	0.83057	0.814199
	0.908249	0.940391
	0.696891	0.880106
	0.892697	0.703079
	0.689019	0.892385
	0.761943	0.854216
	0.806592	0.80261
	0.897059	0.764735
	0.807403	0.817829
	0.736456	0.920946
	0.776187	0.878676
	0.754386	0.711396
	0.87114	0.803217
	0.944011	0.725542
	0.828964	0.739951
	0.884669	0.672932
	0.987654	0.649729
	0.843002	0.676443
	0.983939	0.70572
	0.769477	0.761825
	0.817859	0.698787
	0.823418	0.829338
	0.992079	0.839205
	0.747423	0.811522
	0.884846	0.885332
	0.850062	0.750825
	0.846202	0.77801
	0.806131	0.863318
	0.824613	0.83009
	0.835434	0.63419
	0.787916	0.708648
	0.903256	0.833248
	0.820101	0.818451
	0.963944	0.692404
	0.96635	0.861133
	0.828331	0.736594
	0.862069	0.81376
	0.974026	0.742347
	0.810948	0.765321
	0.66221	0.77881
	0.71752	0.722022
	0.850974	0.869227
	0.857241	0.773441
	0.778571	0.752696
	0.834821	0.830189
	0.848029	0.769714
	0.996122	1.05482
	0.878808	1.23449
	0.742555	0.788679
	0.777518	0.965248
	0.91135	0.877108
	0.744131	0.833854
	0.850622	0.801855
	0.607201	0.799595
	0.876679	0.672981
	0.933984	0.770678
	0.96562	0.723775
	0.999517	0.71905
	0.862302	0.865242
	0.852259	0.85297
	0.895153	0.727334
	0.963445	0.846753
	0.828349	0.792929
	0.738636	0.702614
	0.847019	0.750347
	0.823899	0.905393
	0.768341	0.798521
	0.912093	0.988764
	0.682819	0.8
	0.821129	0.798556
	0.80305	0.734807
	0.896524	0.832027
	0.830038	0.706897
	0.895211	0.837209
	0.859269	0.82299
	0.849884	0.841785
	0.973298	0.718284
	0.84546	0.969077
	0.956025	0.813171
	1.04898	0.75804
	0.777365	0.774709
	0.86146	0.799859
	0.753134	0.741845
	0.921569	0.74318
	0.859813	0.958447
	0.775773	0.851384
	0.973871	0.756778
	0.977433	0.661304
	0.77416	1.11873
	0.740773	0.792414
	0.704315	0.699659
	0.850768	0.695353
	0.961045	0.798345
	0.829531	0.725431
	0.756119	1.1277
	0.931828	0.813939
	0.766061	0.927609
	0.875138	0.735294
	0.791269	0.843704
	0.759344	0.668134
	0.840791	0.797244
	0.888726	0.807971
	0.94896	0.728661
	1.08501	0.801363
	1.0249	0.835526
	0.836451	0.735995
	0.811466	0.748257
	0.92716	0.907579
	0.828778	0.912495
	0.916694	0.630705
	0.984127	0.745083
	0.823802	0.730684
	0.909461	0.67182
	0.74615	0.747247
	0.948492	0.995077
	0.729642	0.741329
	0.840382	0.833751
	0.831965	0.841779
	0.747525	0.817105
	0.895568	0.759793
	0.838636	0.888199
	0.741088	0.883614
	0.926108	0.830291
	0.83852	0.672427
	0.915487	0.828835
	0.956757	1.03122
	0.78663	0.892182
	0.858065	0.693966
	0.811725	0.832575
	0.813606	0.721642
	0.839396	0.791519
	0.889991	0.7872
	0.913834	0.724276
	0.719557	0.729669
	0.783145	0.701897
	0.901328	0.782377
	0.886594	0.737101
	0.803429	0.761272
	0.784844	0.768084
	0.866261	0.779041
	0.782138	1.21041
	0.816138	0.624348
	0.957406	0.774807
	0.731383	0.738878
	0.803327	0.80781
	0.885023	0.712835
	0.953822	0.816978
	0.775391	0.769683
	0.903415	0.805644
	0.75167	0.805589
	0.92898	0.730826
	0.768519	0.756192
	0.766979	0.774172
	0.798329	0.817886
	0.830924	0.835385
	0.749716	0.762702
	0.877124	0.654445
	0.929617	0.743191
	0.649321	0.961223
	0.917436	0.829664
	0.79915	0.791536
	0.836481	0.757951
	0.885815	0.842506
	1.00238	0.662861
	0.922115	0.885023
	0.915368	0.801766
	0.800971	0.714772
	1.05136	0.794479
	0.955508	0.799235
	0.940107	0.880176
	0.922068	0.898876
	0.81861	0.857719
	0.876048	0.894047
	1.01768	0.814932
	0.817301	1.22461
	0.780277	0.807097
	0.914761	0.888693
	0.850071	0.847561
	0.808623	0.794898
	0.789536	0.656447
	0.829096	0.647857
	0.93637	0.715054
	1.20567	0.852736
	0.851588	0.751592
	0.884601	0.798459
	0.958844	0.711204
	0.777971	0.724403
	0.84507	0.841557
	0.847561	0.739509
	0.916667	0.813127
	0.879674	0.825745
	0.765187	1.05878
	0.963958	0.845192
	0.882429	0.704727
	0.715455	0.773395
	0.897046	0.698433
	0.890201	0.709627
	0.803238	0.891818
	0.934038	0.89134
	0.869671	0.90678
	0.848503	0.72892
	0.777311	0.741518
	0.762041	0.767227
	0.840138	0.730699
	0.887179	1.13888
	0.88474	0.73456
	0.97294	0.729111
	0.864746	0.778146
	0.747027	0.868456
	0.742262	0.865827
	0.909955	0.787062
	0.839833	0.758119
	0.790248	0.734406
	0.843217	0.755319
	0.923871	0.76727
	0.896072	0.77571
	0.722523	0.804677
	0.888357	1.02382
	0.86428	0.867754
	0.861054	0.735518
	0.800969	1.3404
	0.904559	1.11355
	0.859893	0.768371
	0.771134	0.789872
	0.927075	0.71771
	0.735022	0.717971
	0.854545	0.89604
	0.803103	0.705645
	0.775679	0.815592
	0.988168	0.723658
	0.692951	0.848878
	0.856325	0.814346
	0.685419	0.912787
	0.774638	0.894841
	0.828061	0.825352
	0.805765	0.763889
	0.922288	0.82823
	0.87409	0.860674
	0.860759	0.885783
	0.760428	0.97328
	0.9479	0.709261
	0.932522	1.06022
	0.908189	0.710007
	0.817804	0.833521
	0.890157	0.834762
	1.05965	0.82764
	0.777488	0.931257
	0.921569	0.78503
	0.766138	0.80245
	0.877153	0.743631
	0.800515	0.71496
	0.908764	0.888957
	0.817518	0.831833
	0.880756	0.866562
	0.832941	0.883887
	0.810433	0.883838
	0.952169	0.85327
	0.644965	0.834081
	1.03832	0.837154
	0.908154	0.654856
	0.800189	0.725466
	0.721399	0.921764
	0.822785	0.74526
	0.910244	0.715217
	0.92134	0.810511
	0.831421	0.80285
	0.780687	0.826011
	1.00973	0.727001
	0.979222	0.861257
	0.754408	0.798903
	0.905325	0.925366
	0.745124	0.845214
	0.89345	0.903834
	0.826901	0.80163
	1.00796	0.699083
	0.843976	0.872848
	0.800254	0.743075
	0.723757	0.738176
	0.813725	0.853893
	0.842623	0.73949
	1.00567	0.857083
	0.771842	0.736713
	0.854008	0.819425

## Sheet: Figure3E_Nup54_510
Name	Nup54_510_fed	Nup54_510_starved
Median	1.07337	1.06797
First Quartile	1.02352	1.02473
Third Quartile	1.12532	1.11949
				ttest:
Data:	1.0456	1.10322		0.699336
	1.15404	1.3
	1.18929	0.951484
	1.09008	1.10603
	1.01642	0.978352
	1.0009	1.06015
	1.00982	1.13506
	1.18135	1.02637
	1.08884	1.09839
	1.07883	1.01473
	1.09075	1.12532
	1.06538	1.04558
	1.05346	1.02882
	0.98682	1.12444
	1.26628	1.00166
	1.09453	1.04554
	1.11251	1.00822
	1.07712	1.05107
	1.2915	1.17399
	1.02948	1.14298
	1.04986	0.994403
	1.126	0.927317
	1.08101	1.17038
	1.07642	0.941392
	1.10142	1.14535
	1.06868	1.13833
	1.14916	1.01847
	0.974089	1.0372
	1.0394	1.07072
	1.1898	1.13646
	1.10108	1.09302
	1.02897	1.10406
	1.15564	1.14983
	1.06661	1.0641
	1.11741	1.12912
	1.09047	1.10872
	1.07727	1.25567
	1.05123	0.991242
	1.18048	1.00569
	1.11673	1.05744
	0.989115	1.06081
	1.07505	1.05463
	0.930952	0.950347
	1.05025	1.15556
	1.05422	0.992707
	1.04181	1.15211
	0.995633	0.917497
	1.0876	1.09987
	1.00226	1.09351
	1.03738	1.10838
	1.18061	1.15161
	1.13601	1.06167
	1.13321	0.971746
	1.13856	0.976531
	1.04722	0.99689
	0.99267	1.0415
	1.10055	1.07272
	1.05182	1.10075
	1.06791	1.02171
	1.10608	1.0804
	1.0178	1.12905
	1.13203	1.02375
	1.15318	0.996004
	1.03021	1.0548
	1.08138	1.03926
	1.17642	1.08184
	1.15124	0.995905
	1.10172	1.0571
	0.991031	1.15193
	1.12811	1.08535
	0.947054	1.06572
	1.1614	0.988752
	0.975541	1.15085
	1.06246	0.92246
	1.05607	1.06242
	1.24061	1.12974
	1.09561	1.00473
	1.03241	1.09146
	1.06936	1.00497
	1.01393	1.10957
	1.06241	1.12561
	1.12677	1.15255
	1.0681	1.12185
	0.959364	1.09057
	1.05817	0.954955
	1.0792	1.13922
	1.03001	1.09368
	1.07097	1.01145
	1.03423	1.01305
	1.21993	1.11148
	1.12802	1.15328
	1.02254	1.10905
	1.0121	1.15205
	1.19986	1.06785
	1.02624	1.0741
	1.12066	1.19848
	1.12631	1.07846
	1.03106	0.978704
	1.01273	1.0698
	0.901912	1.0501
	1.01335	1.06124
	0.944984	1.0518
	1.05053	1.265
	1.03291	1.05534
	0.948663	1.09356
	1.08591	1.04496
	1.14256	1.13909
	1.02748	1.04975
	1.13014	1.13189
	1.10738	1.04791
	1.10987	1.12189
	1.19771	1.14329
	1.09274	1.06733
	1.3346	1.15253
	0.994429	1.11128
	1.07115	0.96216
	1.03668	1.19987
	0.978937	0.960157
	1.12674	1.06483
	1.05167	0.889518
	1.19067	1.03497
	1.09555	1.11713
	1.1039	0.969231
	1.11307	0.946117
	1.1324	1.33763
	1.02536	1.07146
	1.19733	1.02433
	0.945827	1.01343
	1.14742	0.966648
	1.07819	1.01183
	1.06544	1.07486
	1.01275	1.17842
	0.994475	1.16628
	0.857923	1.0686
	0.984405	0.896255
	1.02383	0.981647
	1.01343	1.11398
	1.05101	1.03699
	1.06863	1.13644
	1.04777	1.17127
	1.13642	1.09167
	1.11383	1.11903
	1.06859	1.04933
	1.10362	1.0278
	1.10393	1.02046
	1.0084	1.04817
	1.03173	1.16468
	1.09632	1.05014
	1.18648	1.09363
	1.10463	1.0239
	1.01359	1.26079
	1.30293	1.25756
	1.16859	1.11963
	0.981481	1.02902
	1.06495	1.13769
	1.10245	1.05368
	1.10276	1.08011
	1.09574	1.11464
	1.1719	1.06386
	1.05992	1.05858
	0.90208	1.14028
	1.14165	0.964819
	1.07299	1.11276
	1.08764	1.02231
	1.02468	1.15828
	1.18985	1.08463
	1.1257	1.02104
	1.11582	1.04433
	1.15451	1.00468
	1.01588	1.09614
	1.06758	1.20907
	1.07002	1.08399
	0.99255	1.09008
	1.03864	1.07439
	1.04249	1.02935
	1.19749	1.15016
	1.12418	1.09906
	1.02737	1.03046
	1.03497	1.02873
	0.986441	0.996689
	1.07414	1.01477
	1.14946	0.997951
	1.00679	1.13922
	0.924116	1.14227
	0.984808	1.08982
	1.09776	1.08885
	1.2378	1.05886
	1.09604	1.05604
	1.06122	1.06761
	1.04449	0.943558
	1.20327	1.03401
	1.00082	1.07254
	0.950698	1.11828
	1.15301	1.04627
	1.26077	0.976013
	0.973022	1.02278
	1.09879	1.07663
	1.17175	1.03892
	1.07459	1.05662
	0.988905	1.13804
	1.0141	1.11687
	1.13831	1.17795
	1.11101	1.03433
	1.05766	1.06546
	1.07727	1.02592
	1.02338	1.0569
	1.10814	1.08065
	1.10764	1.0555
	1.08088	0.969437
	1.01668	0.968985
	0.995146	1.11142
	1.01495	1.15048
	1.10711	1.11986
	1.09435	1.0059
	0.939105	0.97546
	0.988532	1.06618
	1.24317	1.01786
	1.10604	1.14848
	0.947872	0.968069
	1.03959	1.03796
	0.95479	1.07105
	0.929448	1.07363
	1.12658	1.05159
	1.13057	1.15477
	1.02912	1.04863
	1.1095	1.16457
	1.04035	0.975335
	1.14453	1.30082
	1.11268	0.941325
	1.08742	1.109
	1.18844	1.1168
	1.10598	1.0022
	1.03358	1.06149
	1.00122	1.12212
	1.07414	1.17237
	1.22149	1.11023
	1.05085	1.13068
	1.133	1.06381
	1.15176	1.06803
	1.17774	1.1001
	1.10498	1.0501
	1.0733	0.964508
	1.08438	1.06791
	1.02341	1.06981
	1.00914	1.06608
	1.003	1.01803
	1.05075	1.05714
	1.04803	1.07444
	1.03165	1.09521
	1.18605	1.09506
	1.14114	0.997786
	1.19158	1.06106
	1.05006	1.11475
	1.08131	1.13916
	1.05673	1.15436
	0.979034	1.14712
	1.09762	0.992993
	0.993127	1.11907
	0.978678	1.09628
	0.968831	1.04792
	1.1015	1.01588
	1.1299	1.15915
	1.13525	0.935484
	1.04694	1.10925
	1.10065	0.925275
	1.12613	1.03222
	1.11339	1.087
	0.925	1.00591
	1.12968	1.04485
	1.10911	1.0721
	1.10435	1.04499
	1.01844	1.01598
	1.10408	1.09665
	1.0143	1.18694
	1.13433	1.16097
	1.04915	1.14278
	1.08824	1.13063
	1.17086	1.06513
	1.1532	0.996738
	0.990741	1.16667
	0.992787	1.04397
	1.122	1.04677
	1.14804	1.12471
	1.01836	1.09243
	1.07343	1.08005
	1.06124	1.01634
	1.12992	1.00891
	1.15476	1.15671
	1.19481	1.1313
	1.03458	1.0604
	0.927101	1.08832
	1.02141	0.9778
	1.01111	1.11797
	1.07185	1.03506
	1.00129	1.09109
	1.03065	1.01023
	1.03879	1.15967
	1.12107	1.09116
	0.925687	1.13659
	0.966211	1.05938
