# Supplementary material for: Conformation of the nuclear pore in living cells is modulated by transport state
Source: eLife. 2020 Dec 21;9:e60654. doi: 10.7554/eLife.60654 (PMC7752133; doi:10.7554/eLife.60654)
Supplement: Figure 4—figure supplement 2—source data 1. [file elife-60654-fig4-figsupp2-data1.xlsx]

## Sheet: Figure4_S2A_Nup133_8Starved
Name	Nup133_CRISPR_8_Fed	Nup133_CRISPR_8_Starved
Median	0.859727	0.855864
First Quartile	0.821008	0.810142
Third Quartile	0.907087	0.905735
				ttest:
Data:	0.835744	0.859233		0.70216
	0.844982	0.898428
	0.835721	0.905969
	0.93347	0.838394
	0.918567	0.929471
	0.778146	0.909633
	0.903226	0.841779
	0.865344	0.88425
	0.835604	0.827385
	0.732992	0.805401
	0.829878	0.930622
	0.857755	0.91982
	0.860175	0.889535
	0.731818	0.889199
	0.817382	0.819286
	0.991616	0.892418
	0.914501	0.905822
	0.851744	0.757502
	0.804766	0.857008
	0.867295	0.879705
	0.890625	0.905042
	0.829615	0.793413
	0.925498	0.816286
	0.851721	0.83596
	0.960847	0.93538
	0.941128	1.1112
	0.821117	0.84522
	0.907178	0.809649
	0.796504	1.04099
	0.939058	0.814612
	0.898955	0.845875
	0.792553	0.821767
	0.917422	1.00082
	0.772983	0.915076
	0.851017	0.890951
	0.803983	0.825797
	0.720693	1
	0.81286	0.833676
	0.867633	0.775742
	0.953961	0.808294
	0.739344	0.842756
	0.869976	0.89115
	0.835174	0.951835
	0.811782	0.782251
	0.759339	0.855378
	0.927389	0.806667
	0.911833	0.764759
	0.885417	0.86776
	0.796935	0.856172
	0.814947	0.839302
	0.853904	0.807657
	0.857143	0.946089
	0.8757	0.925926
	0.804255	0.972995
	0.947462	0.925354
	0.838785	0.839714
	0.824601	0.860982
	0.887175	0.880862
	0.924211	0.820928
	0.923259	0.830189
	0.829804	0.996207
	0.795074	0.862209
	0.959528	0.899263
	0.872647	0.933238
	0.882823	0.879279
	0.905836	0.770227
	0.83235	0.99094
	0.889924	0.743817
	0.748966	0.917878
	0.850566	0.960526
	0.832322	0.931846
	0.865906	0.801174
	0.849345	0.905473
	0.802035	0.924718
	0.93719	1.05201
	0.829051	0.863
	0.820972	0.892917
	0.809677	0.94422
	0.880753	0.8086
	0.864691	0.90022
	0.922339	0.769055
	0.826263	0.807254
	0.875396	0.83532
	0.912309	0.878992
	0.922414	0.919577
	0.707504	0.852518
	0.857143	0.854132
	0.843461	0.844701
	0.940114	0.951177
	0.858896	0.897527
	1.08015	0.879765
	0.956113	0.888139
	0.827148	0.876805
	0.844199	0.81083
	1.05118	1.04138
	1.04437	0.933684
	0.936061	0.683472
	0.776596	0.823749
	0.817481	0.951807
	0.784784	0.83432
	0.838208	0.854545
	0.859279	0.855556
	0.783972	0.905295
	0.855308	0.792287
	0.828729	0.83236
	0.747065	0.790909
	0.926053	0.801965
	0.903523	0.7844
	0.82545	0.768251
	0.925563	0.910345
	0.801043	0.859855
	0.882948	1.06197
	0.874834	0.79828
	0.863309	0.866316
	0.833989	1.01491
	0.879699	0.787101
	0.773309	0.843907
	0.845475	0.96
	0.906699	0.840534
	0.836502	0.834171
	0.984718	0.852751
	0.850036	0.787212
	0.815319	0.868697
	0.935897	0.804118
	0.810569	0.920954
	0.856445	0.787076
	0.886842	0.791991
	0.935048	0.744203
	0.868063	0.818805
	0.857023	0.817073
	0.8842	0.851777
	0.870073	0.862069
	0.988173	0.777947
	0.897207	0.767258
	0.917051	0.861176
	0.946565	0.810007
	0.94321	0.92
	0.973829	0.735294
	0.936633	0.78963
	0.94964	0.881526
	0.89126	0.855
	0.974398	0.842837
	0.8861	0.797644
	0.843863	0.833511
	0.822599	0.877609
	1.01463	0.808858
	0.891129	0.793033
	0.933955	0.81588
	0.798303	0.884319
	1.05387	0.849805
	0.864921	0.934817
	0.79697	0.719498
	0.7885	0.834826
	0.901995	0.901532
	0.855658	0.894495
	0.894334	0.848777
	0.844845	0.853904
	0.854234	0.858974
	0.95152	0.746299
	1.04227	0.834119
	0.775862	0.773529
	0.864764	0.898453
	0.83216	0.871236
	0.862269	0.866716
	1.16039	0.799569
	0.784946	0.84428
	0.860444	0.724072
	0.718902	0.919878
	0.803605	0.902103
	0.846642	0.732363
	0.844172	0.801539
	0.828047	0.81453
	0.871979	0.831823
	0.816588	0.850091
	0.887715	0.840393
	0.900265	0.804104
	0.923935	0.848485
	0.937365	0.808399
	0.823449	0.87037
	0.776733	0.883178
	0.894269	0.935622
	0.732502	1.01387
	0.97554	0.864108
	0.880435	0.865334
	0.833333	0.920029
	0.818909	0.808495
	0.978296	0.869658
	0.923961	0.855491
	0.923191	0.760144
	0.789527	0.884093
	0.880907	0.806084
	0.834842	0.73031
	0.906008	0.934974
	0.869723	0.874334
	0.907631	0.700855
	0.764045	0.834123
	0.906494	0.900641
	0.845802	0.800591
	0.886111	0.90233
	0.88787	0.908788
	0.884004	0.892748
	0.807692	0.807623
	0.828258	0.992701
	0.94527	0.875584
	0.906812	0.862559
	0.799119	0.82588
	0.90448	0.933157
	0.837775	0.862565
	0.702922	0.832117
	0.907292	0.9603
	0.84396	1.01244
	0.9938	0.882781
	0.846508	0.773183
	0.921504	0.761649
	0.946871	0.849965
	0.879602	0.761868
	0.99397	0.908869
	0.917017	0.854584
	0.803942	0.893075
	0.837328	0.824526
	0.88961	0.952381
	0.934375	0.964444
	0.952618	0.794316
	0.906716	0.857834
	0.789887	0.803571
	0.800476	1.07432
	0.894687	0.793899
	0.936635	0.799122
	0.914056	0.852192
	0.857034	0.993622
	1.00161	0.880201
	0.95488	0.806804
	0.942141	1.05016
	0.82559	0.801762
	0.750619	0.804394
	0.859119	1.02383
	0.852833	0.852817
	0.850099	0.949762
	0.831761	0.929716
	0.845503	0.823766
	0.862661	0.969213
	0.791439	0.845547
	0.897196	0.824043
	0.897787	0.877787
	0.921193	0.856798
	0.855285	0.757085
	0.871956	0.875836
	0.855655	0.935922
	0.865169	0.840164
	0.904594	1.04826
	0.774481	0.911436
	0.77573	0.8328
	0.929398	0.813636
	0.877565	0.807873
	0.804695	0.908537
	0.854043	0.913966
	0.820584	0.950883
	0.814132	0.855072
	0.824257	0.870416
	0.897278	0.79831
	0.898187	0.942801
	0.781635	1.08755
	0.793839	0.830837
	0.881508	0.753525
	0.865254	0.797321
	0.810185	0.893891
	0.773998	0.823529
	0.770238	0.934737
	0.769314	0.836409
	0.860777	0.920546
	0.802647	0.873162
	0.8778	0.880569
	0.892759	0.836824
	0.906654	0.891837
	0.812983	0.87524
	0.882474	0.784173
	1.02626	0.970274
	0.8375	0.927551
	0.895854	0.995031
	0.775665	0.884661
	0.834612	0.882403
	0.920213	0.739282
	0.789781	0.859498
	0.800801	0.875949
	0.919658	0.947368
	0.907216	0.9133
	0.829749	0.864177
	0.781176	0.733212
	0.802178	0.845829
	0.797484	0.81994
	0.834732	0.990485
	0.852564	0.778428
	0.84491	0.745923
	0.766311	0.925081
	0.89916	0.826335
	0.917757	0.890569
	0.834525	0.754902
	0.818074	0.765088
	0.955779	0.815978
	0.775024	0.810547

## Sheet: Figure4_S2B_Nup54_1_starve
Name	Nup54_1_fed	Nup54_2_fed
Median	1.95062	2.02311
First Quartile	1.80664	1.83453
Third Quartile	2.05017	2.16484
				ttest:
Data:	1.83709	1.9734		0.035711
	1.69543	1.96925
	1.98741	1.32859
	2.10243	1.99761
	2.07002	2.26023
	1.77778	2.07224
	2.01648	2.18294
	2.01359	2.18828
	1.8415	1.97683
	1.83754	1.81402
	1.70602	2.008
	1.78571	1.47171
	1.65556	1.62222
	2.01312	2
	2.27918	1.80217
	2.22526	2.14213
	1.86148	1.99154
	2.15759	2.26768
	2.20914	1.93136
	1.75718	1.71805
	1.59259	1.41773
	2.08486	2.14607
	1.54114	2.14419
	2.1102	1.82588
	1.89482	2.08254
	1.67457	1.76331
	1.68756	2.04206
	2.03605	1.96145
	2.16369	1.0327
	1.65015	2.21039
	2.22111	2.02699
	1.99042	1.85571
	1.88681	2.19497
	2.15411	1.33333
	2.14519	1.98984
	2.25158	1.92254
	2.04613	1.64865
	1.97869	1.93865
	1.91547	1.87458
	1.7525	2.0903
	2.1046	1.85291
	1.97083	1.89823
	2.35283	1.76517
	1.95396	1.29248
	1.67219	2.24599
	1.85128	2.09644
	1.8958	2.27763
	1.96607	2.09201
	2.17582	2.21322
	2.06039	2.4201
	1.53989	1.87418
	2.0469	2.10491
	2.00797	1.97636
	2.22297	2.01587
	1.58473	1.76084
	1.70328	2.16535
	1.66263	2.2448
	1.7686	2.12229
	1.85543	2.09977
	2	1.63951
	1.66945	2.08558
	2.02769	1.69902
	1.72045	2.4408
	2.01617	2.21845
	1.74429	2.08442
	1.78063	1.80458
	1.96532	1.93602
	1.83812	2.15182
	1.95603	2.01778
	1.9534	2.08351
	2.07532	2.3741
	1.9852	1.98136
	1.93532	2.1158
	2.20539	2.09389
	1.70828	2.09194
	2.02827	1.94459
	2.12712	2.22577
	2.20821	1.89091
	1.97364	2.49144
	1.98957	2.34541
	1.78305	2.26316
	2.04225	1.50909
	2.07204	1.91448
	1.63995	2.02919
	2.14111	1.47375
	1.68709	1.88153
	2.1636	1.32227
	1.71259	1.66458
	1.99279	1.89157
	2.24566	2.13376
	1.88593	1.83174
	1.71742	1.93939
	1.84229	1.34956
	1.90958	1.92272
	1.69012	2.36364
	2.02305	1.7383
	1.7238	1.85179
	1.82459	2.3205
	1.59668	1.35515
	2.00844	1.86556
	2.01792	1.98249
	1.57889	2.04096
	2.04332	2.09974
	1.61822	2.27038
	1.9602	2.19815
	2.00556	1.70968
	1.92034	2.15486
	2.02117	1.71257
	2.10706	2.04851
	1.93194	2.20105
	2.13166	2.13966
	1.57038	2.04793
	1.90521	1.65799
	1.79923	2.06338
	1.90068	1.23266
	1.87994	2.11014
	2.00643	2.32577
	2.16562	1.98349
	1.60531	2.23029
	1.96243	2.03887
	1.80081	1.91581
	1.8797	2.1864
	1.94656	1.52028
	1.79797	2.12458
	2.25226	1.98842
	1.82561	2.01784
	1.96702	1.92357
	2.04158	1.54505
	1.6107	2.18052
	2.1049	1.99637
	1.89254	1.72178
	1.74672	2.22325
	2.0277	1.54816
	1.99478	2.29241
	2.04086	1.9368
	1.92411	2.34809
	1.84857	1.2184
	1.88556	2.19226
	1.83905	1.94844
	2.01887	1.8207
	1.8755	1.91
	2.27008	1.73523
	2.17218	2.2679
	1.875	1.88631
	1.80959	1.83048
	1.90583	2.03175
	1.81078	1.98331
	2.04319	2.20238
	1.52687	2.00114
	1.84512	2.09764
	2.04481	2.04589
	2.25885	2.11701
	1.89139	1.84237
	1.75719	1.58835
	1.84641	2.09061
	1.93455	2.25373
	2.30286	2.14176
	2.09744	2.06177
	2.08339	1.30043
	2.04534	2.10681
	2.04342	2.26257
	1.83669	1.79892
	1.84769	2.0559
	1.57493	2.28859
	1.68289	1.87211
	1.50554	2.16585
	2.1298	1.42779
	1.69021	2.29461
	1.95423	2.41656
	2.2929	1.9778
	1.99736	1.74259
	1.91126	2.21662
	2.0583	2.24086
	2.0365	2.25797
	2.37849	1.81242
	1.94201	2.19569
	1.88267	2.09354
	1.88671	2.17576
	2.15046	2.02464
	2	1.82157
	2.05126	2.30399
	1.49932	1.46472
	1.95137	1.34491
	2.14152	2.33955
	2.17075	2.14072
	1.89355	2.26797
	2.09242	2.08112
	1.81329	2.07034
	1.64875	2.10638
	1.83871	2.13685
	1.88609	1.61814
	1.95971	1.87919
	1.73953	2.12669
	1.72294	2.32636
	1.67655	1.9101
	2.00132	1.6159
	1.91119	2.26621
	1.88819	1.834
	2.03857	1.83611
	1.64	1.97851
	1.45649	2.01397
	2.2389	2.0213
	1.82067	1.91202
	1.6402	1.98286
	1.74526	2.14266
	1.85067	2.1649
	1.80069	2.25546
	1.64755	1.90909
	2.0368	1.42039
	2.41874	2.08354
	1.96	2.36794
	2.0188	1.61392
	1.68262	1.79805
	1.99775	1.88692
	1.98144	1.8813
	1.77233	1.49895
	1.88923	2.22211
	1.89831	2.16465
	1.71725	2.0628
	2.15183	1.93194
	1.72077	1.33159
	2.23021	2.04045
	1.5922	1.9912
	1.94753	1.81034
	2.2038	1.93326
	1.80565	2.17184
	1.97425	1.74155
	2.00629	2.28612
	1.91495	1.93858
	1.58876	2.06072
	2.23802	2.03393
	2.25764	2.03184
	2.00513	2.3504
	1.8861	2.07187
	1.91885	2.11732
	1.82585	1.92267
	2.00708	2.08854
	2.14807	2.32875
	1.51817	1.99034
	1.88535	1.94082
	2.00913	1.65374
	1.9234	1.80946
	2.0236	2.30047
	1.90667	1.99541
	1.7284	2.09046
	1.92068	2.25088
	2.08367	1.96472
	1.85032	1.88811
	2.11487	2.10273
	2.44977	2.05022
	2.17269	2.13037
	2.25575	1.81464
	2.08677	1.82139
	2.24867	2.17036
	1.97802	2.15722
	1.81876	2.52587
	1.66302	2.19535
	2.08842	2.41275
	2.03774	1.42402
	1.84615	2.11463
	2.05611	2.22623
	1.57983	2.04416
	2	2.18895
	2.01472	1.87555
	1.83936	2.08753
	1.93588	1.42536
	1.56696	1.03234
	2.0974	1.92877
	1.98352	2.19913
	2.11236	1.86563
	2.03015	1.95125
	1.897	2.05706
	2.11111	2.04798
	1.78809	2.08774
	2.03313	2.02158
	2.10241	2.29157
	1.7338	1.36164
	2.15989	2.22866
	2.00353	2.18244
	2.16871	1.71772
	2.22484	2.45467
	1.77476	1.89301
	2.18414	1.26923
	1.97857	1.70616
	2.14516	1.76366
	2.11234	1.46377
	2.24441	2.14439
	1.91879	2.1295
	2.09016	2.07642
	1.8613	1.68843
	2.02306	1.77943
	1.49855	1.73106
	1.93271	2.30828
	1.99218	2.18808
	1.94987	2.24644
	1.92288	2.27628
	1.7071	1.48721
	2.01724	1.83649
	1.82965	1.8203
	1.33083	2.046

## Sheet: Figure4_S2C_Nup54_2_starve
Name	Nup54_2_fed	Nup54_2_starved
Median	0.979644	1.00564
First Quartile	0.909931	0.935467
Third Quartile	1.05527	1.07459
				ttest:
Data:	1.01288	0.996667		0.00246417
	0.918415	1.12844
	1.08779	0.918216
	0.983784	0.846377
	1.01005	0.945504
	0.836538	1.04301
	0.886305	1.00328
	1	0.951705
	0.985294	0.869936
	1.04408	1.14724
	1.11953	1.09513
	1.00756	1.16618
	1.04698	1.1422
	0.864322	1.0117
	0.961353	0.922297
	0.901747	0.926752
	0.922449	0.871795
	1.14831	1.01241
	1.18266	0.992647
	1.14208	1.04296
	0.839034	0.911661
	0.978673	0.867089
	1.12693	0.846341
	1.07643	0.93985
	1.04439	0.880407
	1.09091	0.98513
	0.896313	1.03249
	1.13011	1.10247
	0.867063	1.01909
	0.978723	1.11628
	1.02932	0.873016
	1.12463	0.842975
	0.888252	0.820728
	0.970684	1.14453
	1.00277	0.84
	0.870056	1.15776
	0.885886	1.03448
	1.01597	1.20377
	0.868182	1.17865
	0.942935	1.03161
	0.967949	1.00843
	1.01176	1.01985
	0.951705	1.00237
	1.1224	0.98892
	1.04835	0.91129
	0.855219	0.966154
	1.11825	0.922849
	1.18571	1.20803
	0.862876	1.04659
	0.773196	1.04367
	0.85977	0.813559
	1.13716	0.988722
	1.0216	0.932011
	0.924939	1.35185
	0.992042	0.821429
	0.962162	1.07337
	0.8125	0.99505
	0.950372	0.914286
	1.056	0.92236
	1.0212	0.909774
	1.14252	1.06338
	0.973392	1.12546
	0.923547	1.06883
	0.745223	0.933014
	0.934132	0.865854
	1.0483	1.00885
	0.912037	1.23774
	1.02632	1.15985
	0.855491	0.841026
	1.16	1.04348
	1.07522	1.16923
	1.09863	1.07197
	0.96577	1.04912
	0.91796	0.949405
	0.832569	0.973262
	1	0.957265
	0.94186	1.04478
	0.967742	1.13735
	1.00308	1.09851
	1.05903	0.986034
	1.00857	0.812903
	0.830739	1.35759
	1.01476	0.973684
	0.832941	0.879032
	1.10569	0.915068
	0.902004	1.06742
	1.00248	1.0075
	1.01133	1.12281
	0.853659	0.863281
	0.907042	0.965854
	0.983193	1.11934
	0.910217	0.925676
	1.13143	0.854503
	0.806094	0.952381
	1	1.05028
	1.18548	0.952494
	1.09706	1
	0.992327	1.23293
	1.11884	0.908772
	1.10969	0.977401
	1.04155	0.855513
	1.07927	0.833333
	0.955679	0.90099
	1	1.04532
	0.883991	1.03383
	0.98044	1.11006
	0.873684	0.880814
	0.882206	1.13181
	1.08685	0.96587
	0.911439	0.933735
	0.972527	0.932203
	1.12931	0.991701
	1.00693	1.01056
	0.864706	1.02752
	1.03741	1.10145
	0.96729	0.949495
	0.905512	0.936909
	0.940568	1.07197
	1.16539	1.04194
	0.901961	0.924419
	0.969359	0.977492
	0.98773	1.10662
	1.02586	1.07234
	0.865031	0.853659
	1.13959	1.00941
	0.964706	0.935714
	0.994638	0.960573
	0.938462	1.18821
	0.968566	1.05848
	1.08794	0.905759
	0.844639	1.0823
	1.05307	1.02736
	0.899183	1.07872
	1.06296	1.00707
	0.853306	0.961749
	0.912892	0.780788
	0.926773	1.05867
	0.969529	0.840659
	0.936275	0.94518
	1.04489	0.957865
	1.06977	1.12302
	1.03642	0.976471
	1.13537	0.959596
	0.961098	0.942356
	0.933921	1.06855
	0.909408	1.03815
	0.988981	1.10993
	0.928571	0.93314
	0.876147	1
	1.05696	1.2515
	1.11905	1.00442
	0.828502	0.951613
	1.08267	1
	0.95641	0.814815
	0.862408	0.914191
	0.886792	1.29365
	0.997093	0.982394
	0.927807	0.882653
	0.866324	1.07143
	0.991968	0.934087
	1.13201	1.12411
	0.889488	1.03106
	0.952381	1.00276
	1.00538	0.956656
	1.04412	0.910072
	1.04408	0.967213
	0.829787	1.21603
	1.05085	0.937811
	1.12605	0.924855
	0.943262	1.03984
	1.03252	0.996923
	0.863158	1.01929
	0.842451	0.92823
	1.13075	1.08869
	0.965347	1.0566
	0.909836	0.972973
	1.23174	0.981432
	0.852174	1.06434
	0.976	0.877778
	1.01923	1.04068
	1.05949	1.13415
	1.02067	0.834483
	1.08499	0.915452
	0.865604	0.85514
	0.906921	0.954386
	1.06325	1.02299
	1.02778	0.978142
	0.781395	0.991202
	0.93314	0.936
	0.762605	1.2
	1.1716	0.995192
	0.913947	1.08171
	0.876316	1.14685
	1.03631	1.06725
	0.89038	1.26531
	0.981132	0.906173
	0.786432	1.22878
	0.953642	1.06081
	0.730483	1.01463
	0.992405	0.984436
	1.00292	0.888889
	0.85446	1.12698
	0.901163	1.04294
	0.984055	0.931677
	0.973039	1.0292
	1.02349	1.00968
	1.19613	1.04204
	1	1.02211
	1.09114	0.915858
	0.893417	0.870416
	0.970179	1.01205
	0.919173	1.08845
	0.942598	1.075
	0.85872	1.02299
	1.10909	1.15613
	1.08986	1.07927
	0.809524	0.996403
	0.841608	1.11326
	0.964602	0.982014
	1.14734	1.28716
	0.979695	1.13514
	1.0495	1.10156
	0.961883	0.954373
	1.35116	1.01653
	1.03448	0.944853
	1.06433	0.935385
	0.936321	0.96
	0.966063	0.96831
	1.06143	1.11382
	1.14685	0.926009
	1.01706	0.868035
	0.901786	1.02632
	1.088	0.937677
	1	1.07256
	0.92691	0.863095
	0.935567	0.801546
	0.778926	1.03586
	1.10248	1.17557
	1.06579	0.914191
	1.06545	1.07983
	0.832031	1.01289
	0.851145	1.16168
	1.05114	1.1051
	0.84375	1.11968
	0.850746	1.03712
	1.08506	1.0471
	0.929062	1.04762
	0.97493	0.761702
	1.08311	1.11307
	0.902062	1.10744
	0.934555	0.910082
	0.788413	1.09738
	1.03361	1.04762
	0.901538	1.10843
	0.877729	0.921348
	0.901914	1.13245
	0.81893	0.948104
	0.941032	1.02847
	0.708333	0.968652
	1.00758	1.0625
	0.93985	1.21652
	0.918919	1.25214
	0.912145	1.11157
	0.995434	1.08989
	1.20823	1.1324
	0.993506	0.991045
	0.94186	0.971253
	0.944112	1.02857
	0.918478	1.02817
	1.01345	0.972851
	1.0618	1.05111
	0.988604	0.98722
	0.929782	1.07718
	1.10417	1.07902
	0.97543	1
	1.14173	0.989362
	1.0563	0.816327
	0.881868	1.00685
	1.03245	1.09568
	1.17848	1.05882
	1.11782	0.967509
	1.04695	1.09091
	0.968912	0.961446
	0.979592	0.88162
	1.207	1.05055
	0.930168	0.883008
	1.0155	0.917266
	0.973568	1.08046
	1.08223	0.948718
	1.06011	1.09302
	0.98301	1.01603
	1.07595	0.86478
	1.11207	0.898734
	1.19728	0.959732
	1.06452	1.08915
	1.02217	1.03922
	0.951662	0.938462
	0.943694	1.05528
	1.03837	0.938124
	0.947115	0.954955
