# Supplementary material for: Conformation of the nuclear pore in living cells is modulated by transport state
Source: eLife. 2020 Dec 21;9:e60654. doi: 10.7554/eLife.60654 (PMC7752133; doi:10.7554/eLife.60654)
Supplement: Figure 4—source data 1. [file elife-60654-fig4-data1.xlsx]

## Sheet: Figure4C_Nup133_linkers
Name	Nup133_CRISPR_8	Nup133_CRISPR_9
Median	0.862825	1.12405
First Quartile	0.823273	1.07823
Third Quartile	0.907273	1.1774
Data:	0.798303	0.948558
	0.903255	1.11337
	0.773309	1.07521
	0.921504	1.19772
	0.89126	1.01608
	0.953237	1.1192
	0.93737	1.09372
	0.854086	1.37016
	0.936635	1.31445
	0.851761	1.13774
	0.886842	1.12488
	0.820584	1.17268
	0.796935	1.30387
	0.882474	1.18713
	0.873928	1.18022
	0.773998	1.19044
	0.923259	1.17006
	0.826396	1.1432
	0.894687	1.1431
	0.802178	1.23077
	0.888141	1.16772
	0.796504	1.0219
	0.925197	0.998143
	0.864691	1.09041
	0.857023	1.13785
	0.748966	1.18593
	0.789887	1.26757
	0.852564	1.19621
	0.843826	1.21448
	0.983544	1.119
	0.925926	1.2517
	0.815217	1.11787
	0.911681	1.12701
	0.768665	1.1167
	0.757829	1.0351
	0.792553	1.0688
	0.978296	1.1414
	0.812081	1.08021
	0.838235	1.08451
	0.807658	1.19151
	0.922414	1.29201
	0.778146	1.06736
	0.857143	1.19176
	0.868063	1.07319
	0.936242	1.17519
	0.891129	1.05672
	0.823449	1.10463
	0.880907	1.18898
	0.858597	1.17745
	0.93719	0.920769
	0.895937	1.10248
	0.855658	1.08452
	0.835165	1.13185
	0.927389	1.13043
	0.803605	1.08302
	0.753425	1.27561
	0.884004	1.19739
	0.812686	1.02901
	0.739344	1.0642
	0.818909	1.06224
	0.797484	1.09824
	0.851017	1.16356
	0.774481	1.21136
	0.844845	1.10636
	0.835174	0.990858
	0.890625	1.14246
	0.815319	1.11168
	0.890909	1.0716
	0.776166	1.33049
	0.8757	1.03026
	0.759339	1.17457
	0.857751	1.00519
	0.892157	1.09603
	0.897787	1.16813
	0.799119	0.984155
	0.801043	1.1334
	0.859182	1.10078
	0.917757	1.1172
	0.802035	1.19368
	0.860777	1.1451
	0.834525	1.2493
	0.903226	1.19622
	0.747065	1.11869
	0.947462	1.10407
	0.884724	1.07533
	0.944251	1.00457
	0.718902	1.13478
	0.892759	1.16627
	0.824601	1.12457
	0.871979	1.19428
	0.873385	1.1577
	0.914056	1.03084
	0.929398	1.08868
	0.828729	1.12108
	0.732502	1.17677
	0.82545	1.17224
	1.00174	1.17111
	0.907292	1.18076
	0.855903	1.07766
	0.907631	1.22577
	0.786552	1.29262
	0.912757	1.03265
	0.917051	1.20644
	0.800476	1.1126
	0.960847	1.07054
	0.914501	1.05447
	0.988173	1.08798
	0.877565	1.04465
	0.869976	1.25869
	1.02626	1.12059
	0.932701	1.04632
	0.906494	1.16802
	0.789781	1.04474
	0.898955	1.15222
	0.81153	1.11696
	0.764045	0.980018
	0.82559	1.02151
	0.88961	1.13149
	0.871287	1.12007
	0.838208	1.10188
	0.793839	1.20948
	0.909091	1.194
	0.81286	1.06354
	1.00161	1.00782
	0.772983	1.19281
	0.902102	1.20302
	0.86063	1.10182
	0.926053	1.08957
	0.906008	1.106
	0.868234	1.1803
	0.750619	1.19652
	0.857143	1.10303
	0.846642	1.14822
	0.857034	1.11755
	0.859119	1.07835
	0.867629	1.15256
	0.852833	1.21087
	0.840961	1.11407
	0.869723	0.919558
	0.920213	1.04758
	0.827967	1.2477
	0.831731	1.11759
	0.782791	1.18469
	0.783972	1.19757
	0.935897	1.15576
	0.792164	0.914729
	0.854043	1.17001
	0.850099	1.11352
	0.833989	1.18923
	0.810569	1.15271
	0.802647	1.1451
	0.838785	1.04692
	0.7885	1.07012
	0.872414	1.09639
	0.88751	1.10251
	0.844199	1.08144
	0.935048	1.22618
	0.702922	1.17723
	0.835744	1.05356
	0.829268	1.09748
	1.00416	1.05169
	0.822599	1.10275
	0.781635	0.946655
	0.84375	1.10285
	0.860444	1.05196
	0.834732	0.903148
	0.857755	0.965069
	0.784784	1.06601
	0.940114	1.0626
	0.938859	1.25768
	0.824257	1.14712
	0.86196	1.15821
	0.807349	1.12887
	0.75097	1.12974
	0.912944	1.01492
	0.817382	1.18669
	0.923935	1.23614
	0.800801	1.19512
	0.97157	1.17818
	0.899554	1.22564
	1.03183	1.10874
	0.84491	1.14533
	0.871075	1.15633
	0.808247	1.19982
	0.824333	1.16271
	0.837775	1.08078
	0.939058	1.05171
	0.869478	1.2559
	0.833333	1.16463
	0.84396	1.03752
	0.879699	1.0971
	0.969856	1.09796
	0.846508	0.973581
	0.862193	1.10658
	0.929719	1.034
	1.05118	1.13724
	0.881617	1.36538
	0.867295	1.04455
	0.99397	1.14219
	0.855285	1.17081
	0.748498	1.09825
	0.857862	0.940565
	0.898795	0.999062
	0.919321	1.10862
	0.889924	1.05897
	0.883921	0.965365
	1.03325	1.26231
	0.897278	1.12016
	0.775024	1.27955
	0.865906	1.09448
	0.835721	1.2083
	0.918567	1.24163
	0.776733	1.0814
	0.9938	1.11968
	0.89916	1.03254
	0.890143	1.15958
	0.862661	1.16949
	0.937807	1.10024
	0.895882	1
	0.775882	1.22296
	0.919658	0.986506
	0.906855	1.28986
	0.844982	1.12352
	0.811782	1.13189
	0.780654	1.15578
	0.886111	1.11669
	0.871552	1.12036
	0.81587	1.19364
	0.905836	1.11243
	0.974398	1.17879
	0.887175	1.19746
	0.8842	1.15032
	0.802437	1.05152
	0.886194	1.00168
	0.837363	1.05421
	0.936633	0.965951
	0.925563	1.1007
	0.874834	1.06475
	0.835443	1.10534
	0.821117	1.05814
	0.8778	1.12811
	0.990142	1.00096
	0.863309	1.22015
	0.934375	1.05422
	0.843461	1.06553
	0.894334	1.18706
	0.826171	1.13021
	0.758912	1.16027
	0.83235	1.03673
	0.784946	1.1882
	0.901807	1.12533
	0.804695	1.14002
	0.794894	1.12328
	0.911833	1.11756
	0.83216	1.14463
	0.832479	1.13055
	0.938084	1.18599
	0.907216	1.16076
	0.946115	1.24786
	0.834842	1.07818
	0.94527	1.2666
	0.776596	1.11085
	0.946871	1.01699
	0.862988	1.17543
	0.806378	1.10986
	0.879602	1.12092
	0.905263	1.11453
	0.870073	1.09588
	0.925898	1.18663
	0.928721	1.1647
	0.853904	1.09457
	0.871956	1.13227
	0.942141	1.13104
	0.860175	1.06929
	0.925498	1.16013
	0.929769	1.08791
	0.829051	1.14314
	0.823214	1.04029
	0.8861	1.12629
	0.851721	1.02471
	0.991616	1.19544
	0.947721	1.07951
	0.856771	1.14892
	0.973829	1.13626
	0.849345	1.2374
	0.837328	1.15605
	0.93347	1.21316
	0.882768	1.13056
	0.894269	1.13063
	0.945409	1.13769
	0.855655	1.25954
	1.04437	1.11968
	0.90448	1.09495
	0.897207	1.36574
	0.953961	1.13125
	0.89627	1.11927
	0.776923	1.05643
	0.88787	1.12593
	0.805369	1.43504
	0.770238	1.21565

## Sheet: Figure4D_Nup54_linkers
Name	Nup54_5_fed	Nup54_6_fed	Nup54_7_fed
Median	0.749955	1.8676	1.02059
First Quartile	0.713462	1.72011	0.94601
Third Quartile	0.795081	1.9807	1.09644
Data:	0.787565	1.93417	0.97463
	0.717895	1.90948	1.02053
	0.739526	2.00324	1.03349
	0.761079	1.68618	0.913043
	0.701724	1.93985	1.1608
	0.668478	1.70613	0.912807
	0.713459	1.92424	1.12389
	0.681667	1.88451	1.1236
	0.748271	1.74663	0.860294
	0.786499	1.87387	1
	0.715582	2.06024	1.09091
	0.759921	1.87557	1.01581
	0.732993	1.84444	1.13
	0.733236	1.67136	1.09565
	0.762542	2.12439	1.25424
	0.724189	1.9258	1.184
	0.659298	1.54491	0.969838
	0.781874	1.8744	1.04435
	0.712188	1.90952	0.953488
	0.615293	1.50515	1.16878
	0.779365	2.13921	1.32189
	0.810065	2.02133	0.923077
	0.783005	1.75284	0.978903
	0.722908	1.87844	1.0117
	0.703533	1.69901	0.9599
	0.700587	1.92105	1.29502
	0.696185	1.79487	0.916427
	0.671429	1.95498	0.934343
	0.829545	2.00619	1.02611
	0.738819	1.91592	0.998205
	0.808477	1.9122	0.873188
	0.717949	1.96094	0.858144
	0.721068	1.80126	1.02521
	0.795139	1.79683	0.948052
	0.781711	1.38931	0.938967
	0.685015	1.99535	1.04158
	0.776408	2.06506	0.919003
	0.717728	1.44892	0.933333
	0.746667	1.85282	1.08069
	0.714789	1.86583	0.995662
	0.756338	1.92478	0.934426
	0.784893	1.9793	0.874725
	0.749526	1.9085	0.889655
	0.636218	1.84211	0.899329
	0.727802	1.92577	0.971774
	0.751166	1.82955	1.22006
	0.74212	1.82731	1.05634
	0.725429	2.17534	1.21387
	0.674221	1.93404	0.926573
	0.811404	1.67951	0.895442
	0.728045	1.89486	1.03571
	0.802929	1.97658	1.61497
	0.732372	1.86126	1.21447
	0.915605	1.68239	0.961089
	0.811054	1.7	1.01603
	0.732394	1.45473	1.04528
	0.584197	1.81287	0.967972
	0.73773	1.07031	1.14634
	0.717993	2.15033	1.09642
	0.8672	1.68025	1.27231
	0.746815	1.82789	1.04571
	0.826568	1.84762	0.988914
	0.818466	2.2168	1.11947
	0.800277	2.11692	1.04632
	0.747841	1.7963	0.84104
	0.704225	2.02036	0.98568
	0.775815	1.58991	1.06013
	0.708633	1.95262	1.30579
	0.788401	1.80392	1.16953
	0.748784	1.66529	0.928412
	0.7152	2.01119	1.22648
	0.810985	1.70603	1.22615
	0.855784	1.53553	0.946541
	0.694529	1.80288	0.932347
	0.761842	2.01031	1.0181
	0.728083	1.79688	0.966667
	0.751987	1.6997	1.14014
	0.741472	2.21829	1.04076
	0.686331	2.06739	1.07432
	0.81862	1.89141	1.10092
	0.795556	1.49912	1.13134
	0.755776	1.71944	1.02564
	0.671766	1.62374	0.887029
	0.830159	1.90642	1.23058
	0.831804	1.97792	1.14973
	0.785	1.99031	1.07826
	0.716165	1.74725	1.02203
	0.731915	1.87724	1.0303
	0.813084	1.96899	1.19403
	0.736986	2.06836	1.10938
	0.80742	1.92063	1.08767
	0.666667	1.55709	0.813996
	0.758974	2.17827	0.878307
	0.700671	1.60197	0.887372
	0.777624	1.87054	0.866492
	0.801299	1.65333	0.865613
	0.791604	1.89722	1.12773
	0.722132	1.53667	1.25
	0.888683	2.10026	1.00905
	0.753873	2.20802	1.09645
	0.727422	1.95561	1.07306
	0.753846	1.7897	0.97451
	0.744954	1.93122	1.01807
	0.72774	1.37161	0.855814
	0.680795	1.99803	1.0711
	0.753989	1.84149	0.959091
	0.727403	1.9558	1.05128
	0.728972	1.74771	1.00229
	0.917628	2.09873	0.922078
	0.733004	1.99022	0.95625
	0.672316	1.76115	0.810573
	0.694724	2.02594	1.00461
	0.717241	1.99774	0.981707
	0.756353	2.05909	0.857788
	0.685484	1.8742	0.983015
	0.811321	1.69873	0.987047
	0.692958	2.19159	1.10981
	0.775244	1.77708	1.06987
	0.697947	1.86585	1.01176
	0.779456	1.67356	0.910314
	0.610632	1.99183	0.896353
	0.866928	1.62834	0.958834
	0.843061	1.80562	1.02957
	0.64486	1.91495	0.967391
	0.66325	2.0525	1.01299
	0.698262	1.67647	1.33144
	0.735799	2.00234	1.07289
	0.881081	1.69554	0.991903
	0.848907	1.91162	1.02186
	0.721538	1.75052	0.918367
	0.742448	2.08	1.34091
	0.922807	1.87674	0.916484
	0.710145	2.07246	1.27123
	0.782544	2.08352	1.03738
	0.846774	1.7078	1.12
	0.707783	1.92197	1.28982
	0.78341	1.704	1.14085
	0.815336	1.88771	1.15016
	1.02019	1.8076	0.993355
	0.85989	2.14354	1.05977
	0.779297	1.98118	1.18943
	0.716981	1.84492	0.887755
	0.799427	1.96787	1.05455
	0.754558	1.87978	0.878244
	0.725762	1.74167	0.904762
	0.764151	1.9218	1.03039
	0.812317	1.62379	0.956522
	0.788136	1.89444	1.07837
	0.806709	1.72209	1.00332
	0.680101	1.61504	0.959677
	0.810478	1.98738	0.891544
	0.724189	2.01839	0.80916
	0.787097	1.6489	1.07377
	0.839662	2.10617	1.05814
	0.757282	1.98117	1.13937
	0.631336	1.70986	1.06371
	0.813839	1.86788	1.03958
	0.692308	1.65972	0.842963
	0.837895	1.67391	0.988142
	0.704385	1.92325	0.83871
	0.708571	1.73059	0.885714
	0.805732	1.61969	1.06343
	0.705234	1.83592	1.0625
	0.757576	1.95806	0.882353
	0.729131	1.98788	0.96063
	0.71137	1.7954	0.945392
	0.725389	2.02332	0.832994
	0.780702	1.88192	1.12097
	0.645833	1.66954	1.25507
	0.670134	1.71821	0.948052
	0.676036	1.86592	1.18182
	0.797527	1.66414	1.1049
	0.655689	1.53915	0.922053
	0.682893	1.86395	1.18868
	0.774242	1.55534	0.956395
	0.812734	1.87772	1.00292
	0.837651	1.60417	1.10638
	0.76176	1.61414	0.832432
	0.699324	1.73727	1.28631
	0.819536	1.93348	1.05779
	0.784067	1.65368	1.2069
	0.80055	1.88482	1.06609
	0.745066	2.00595	1.05517
	0.754408	1.85682	0.891945
	0.730579	2.01535	0.963816
	0.738769	1.85112	1.33548
	0.750385	1.91627	1.07879
	0.819383	1.90691	1.11069
	0.74127	2.0654	1.04304
	0.685083	1.7044	0.955479
	0.772242	1.86732	1.00427
	0.713472	2.02319	0.9
	0.75975	1.99182	1.10213
	0.723539	2.14329	0.902208
	0.717666	1.42761	0.816444
	0.793765	1.82824	1.08418
	0.69505	1.44643	0.95599
	0.718121	1.80222	1
	0.792115	2.16516	1.38408
	0.722973	1.95785	1.02017
	0.806283	1.45869	0.949248
	0.849498	2.06089	0.966581
	0.84127	1.81723	1.4767
	0.766393	2.04448	0.866142
	0.740171	1.86514	1.18462
	0.713058	2.05291	0.958159
	0.802432	1.97826	1.01799
	0.818991	1.69003	1.0117
	0.757407	1.48866	0.986143
	0.865964	2.02978	1.06452
	0.743409	1.66925	0.899543
	0.676991	1.87097	0.893417
	0.869176	1.51437	1.22202
	0.737105	2.15909	1.05909
	0.713101	1.74233	0.889474
	0.760563	1.76888	1.03363
	0.672474	2.00816	1.00847
	0.8019	2.05621	0.909091
	0.770932	1.50134	0.936275
	0.788889	1.87234	1.04054
	0.799645	1.83692	1.0365
	0.750809	1.93333	1.06178
	0.729647	1.782	1.03133
	0.847788	1.6611	1.01356
	0.655367	1.79775	0.932409
	0.702817	1.97821	1.18293
	0.743516	1.74341	1.03178
	0.788119	1.95312	0.931343
	0.795094	1.70149	1.61754
	0.710332	1.49209	1.17149
	0.726444	1.85158	0.859091
	0.816358	2.06863	1.12371
	0.764885	2.05769	1.17033
	0.649046	1.85778	1.14384
	0.767402	1.85965	1.06416
	0.733529	1.51039	1.05051
	0.691932	1.79532	1.20183
	0.720848	1.96429	1.03586
	0.795041	1.70281	0.96519
	0.785924	1.88776	1.11146
	0.614263	2.15746	1.08802
	0.768916	1.62929	0.905063
	0.767253	1.76134	1.01667
	0.844332	1.7887	1.10563
	0.68599	1.78014	0.965812
	0.893004	1.44979	0.80137
	0.762036	1.97534	1.17073
	0.694561	2.16623	1.03583
	0.729111	1.81735	0.913215
	0.731203	1.88736	0.945833
	0.710414	1.77363	0.893678
	0.759036	1.74033	1.01299
	0.740984	1.85816	0.798715
	0.846449	2.15365	1.01946
	0.768271	1.83871	1.06846
	0.777961	1.90372	0.970745
	0.675781	1.92484	1.01449
	0.707237	1.78959	1.19407
	0.865702	1.91854	1.02066
	0.823932	2.06441	1.03109
	0.698529	1.91233	0.991398
	0.647059	2.09275	1
	0.759055	1.77907	0.956627
	0.710078	2.00227	0.863636
	0.748355	1.85981	0.926199
	0.809869	1.83284	0.861893
	0.79694	1.88251	0.962376
	0.776256	1.64009	1.02564
	0.787234	1.86427	1.16667
	0.893333	1.66063	0.943434
	0.710526	1.65405	1.16102
	0.737097	2.16143	1.19072
	0.745418	2.25397	0.96798
	0.795302	2.00477	1.09644
	0.757143	1.47852	1.03023
	0.819699	1.93694	1
	0.7	1.52694	1.04833
	0.782799	1.85338	1.02752
	0.646605	2.1	1.01449
	0.66411	1.8112	0.897533
	0.725694	1.86644	1.12088
	0.77931	2.09199	1.01326
	0.824261	1.63684	1.03455
	0.791386	1.41339	1.04204
	0.67	1.82692	0.835466
	0.786451	1.85154	1.02881
	0.733703	1.87949	1.10204
	0.798962	2.06231	0.885093
	0.773063	1.88403	1.41304
	0.803008	2.11893	0.838835
	0.71521	1.57333	1.15663
	0.767483	1.82136	1.04057
	0.798793	1.7281	1.0418
	0.826599	1.96861	1.15691
	0.731908	1.63516	1.03951
	0.628342	2.02755	1.08168
	0.67658	1.88889	0.949033
	0.853097	2.05263	1.08197
	0.652474	2.04935	1.23585
	0.753176	1.71625	0.921722

## Sheet: Figure4E_Nup133_starve
Name	Nup133_9b_fed	Nup133_9b_starved
Median	1.12042	1.13457
First Quartile	1.05691	1.07516
Third Quartile	1.18632	1.18969
				ttest
Data:	1.1023	1.18471		0.371171
	1.16312	1.0885
	1.17619	1.08961
	0.978707	1.13442
	1.25338	1.16523
	1.19638	1.10866
	1.20963	1.00554
	1.21593	0.984709
	1.05429	1.02406
	1.17751	1.30047
	1.12845	1.18051
	1.06954	1.00843
	1.11594	1.06202
	1.23396	1.36003
	1.0146	1.02836
	1.091	1.21443
	1.0503	0.964134
	0.930058	1.12279
	1.21382	1.16743
	0.940191	1.07909
	1.1596	0.97953
	1.09064	1.0236
	1.13082	1.11101
	1.04272	0.958249
	1.26337	1.19078
	1.09468	1.37835
	0.962145	1.08794
	1.03725	1.05805
	1.19954	1.07241
	1.23488	1.15525
	1.03775	1.19633
	1.17986	1.09221
	1.11376	1.28031
	1.11386	1.07651
	0.968165	1.03883
	1.07083	1.10034
	1.07633	1.15797
	1.1093	1.15606
	1.1123	1.1216
	1.1171	1.05324
	1.05909	1.10075
	1.12082	1.08464
	1.0474	1.05297
	1.03424	1.10437
	1.13367	1.18364
	1.11943	1.10508
	1.07361	1.1984
	1.45039	1.18996
	1.07261	1.24203
	1.1237	1.06409
	1.09475	1.15573
	1.11765	1.20543
	1.12041	1.0937
	1.09112	1.3069
	1.27677	1.09596
	1.12257	1.07365
	0.963235	1.21976
	1.03455	1.1022
	1.23859	1.06979
	1.13017	1.00721
	1.12608	1.15279
	1.03004	1.25196
	1.19802	1.20554
	1.28679	1.29257
	1.08071	1.1755
	1.17701	1.17773
	1.04014	1.11879
	1.17641	1.07882
	1.13233	1.0859
	1.06057	1.25976
	1.14093	1.12789
	0.986441	1.07558
	1.18637	1.16595
	1.19588	1.24109
	1.02466	1.13113
	1.34159	0.957427
	1.12738	1.07071
	1.22162	1.07872
	1.14344	1.22114
	0.976783	1.20493
	1.12914	0.930314
	1.13777	1.11068
	0.962025	1.21884
	1.14572	1.1935
	1.09038	1.19931
	1.04662	1.1466
	0.96732	1.15584
	0.992226	1.14081
	1.20455	1.27793
	1.14373	1.1234
	1.24902	1.14682
	1.17085	1.00975
	1.10435	1.28273
	1.18121	1.13694
	1.29668	1.15314
	1.33537	1.01627
	1.0969	1.15082
	1.06474	1.07634
	1.24837	1.14132
	1.14985	1.14779
	1.11168	1.12325
	1.07938	1.08333
	1.15523	1.06186
	1.1658	1.05621
	1.1649	1.14296
	1.04907	1.139
	1.18784	1.16147
	1.12018	0.947329
	1.0657	1.1456
	1.08159	1.17575
	1.12403	1.23006
	1.0335	0.973184
	1.05446	1.19869
	1.0627	1.04003
	1.14066	1.12446
	1.06589	1.15571
	1.05371	1.12651
	1.03122	1.09102
	1.16524	0.934167
	1.15741	1.14235
	1.20309	1.10393
	1.08403	1.22814
	0.979317	1.20952
	1.17581	0.977143
	1.1257	1.24701
	1.25894	1.21366
	1.08506	1.18927
	1.17713	1.09561
	1.20417	1.22209
	1.05035	1.15174
	1.31701	1.12117
	1.26539	1.14329
	1.19293	1.08802
	1.09773	1.12393
	1.21551	1.18522
	1.18648	1.16055
	1.08723	1.01614
	1.22831	1.15876
	0.942085	0.994465
	0.984571	1.14239
	1.1493	1.30428
	1.03245	1.0274
	1.00941	1.06702
	1.02167	0.93662
	1.25765	1.13472
	1.05114	1.03701
	1.0514	1.01196
	1.11557	1.1372
	1.22744	1.15918
	1.18618	1.15855
	1.05144	1.19332
	1.34859	1.1711
	1.21105	1.29359
	1.18202	1.11111
	1.0842	1.22762
	1.16535	1.05505
	0.901042	1.12601
	1.24114	1.11155
	1.14213	1.19985
	1.14019	1.09784
	1.04659	1.14179
	1.03216	1.14507
	1.20375	1.04901
	1.32554	1.07049
	1.04649	1.12422
	1.01266	1.03381
	1.30501	1.1044
	1.21294	1.13238
	0.99545	1.24322
	1.0974	1.23675
	0.924488	1.00094
	1.00902	1.17413
	1.27529	1.06413
	1.04264	1.26144
	1.26744	1.38499
	1.12823	1.10492
	0.969741	1.08057
	1.1495	1.05083
	1.13312	1.18594
	1.09732	1.03717
	1.19872	1.18983
	1.03968	1.07502
	1.15905	1.18485
	1.1057	0.898653
	1.08143	1.00464
	1.18081	1.23839
	1.00928	1.30172
	1.10617	1.27718
	1.11532	1.05603
	1.10025	1.26283
	1.06449	1.22102
	1.10761	1.02387
	1.39127	1.03653
	1.03364	1.16423
	1.08134	1.13068
	1.26172	1.24117
	0.997324	1.1234
	1.26546	1.18505
	1.06917	1.10484
	1.18364	1.19457
	1.16395	1.07026
	1.0009	1.21863
	1.20851	1.09186
	1.00843	1.07249
	1.04797	1.14476
	1.26774	1.16279
	0.919637	1.09548
	1.14223	1.12175
	1.06753	1.09653
	1.24324	1.22074
	1.11445	1.03128
	1.05619	1.15238
	1.17421	1.15548
	1.11885	1.15022
	1.0723	1.22604
	1.08826	1.00753
	1.22162	1.28326
	1.11404	1.19746
	1.17518	0.959279
	1.03097	1.17154
	1.12916	1.2638
	1.24308	1.04617
	0.997785	1.10121
	1.05014	1.16748
	1.00417	1.18103
	1.22551	1.23716
	1.19434	1.21627
	1.13127	1.16219
	1.10135	1.15342
	1.08411	1.13926
	1.11538	1.10651
	1.09624	1.00197
	1.21326	1.13259
	1.28269	1.16287
	1.21828	1.07573
	1.21476	1.06016
	1.14224	1.0347
	1.07525	1.07751
	1.16771	0.94466
	1.13079	1.15614
	1.1682	1.06305
	1.00816	1.14962
	1.27168	1.13501
	1.04118	1.21498
	1.17349	1.22484
	1.25318	1.05671
	1.05149	1.28966
	1.14252	1.22365
	1.02814	1.25453
	1.05403	1.15293
	1.25895	1.21875
	1.29782	1.25148
	1.18093	1.3051
	1.09415	1.08614
	1.20247	1.17032
	1.15538	1.07401
	1.21889	1.17042
	1.08404	1.26311
	1.06391	1.13273
	0.958947	1.10028
	1.1463	1.02437
	1.20305	1.25581
	1.16942	1.24447
	1.26016	1.24758
	1.13659	1.07245
	1.13472	1.0432
	1.1346	1.11652
	0.991424	1.1869
	1.04194	1.11752
	0.937774	1.13105
	1.07097	1.19679
	1.045	1.17854
	1.15859	1.23414
	1.07551	1.13739
	1.08734	1.19568
	1.11856	1.19619
	1.15563	1.07343
	1.12043	1.02707
	1.16637	1.0493
	1.31006	1.03322
	1.31548	1.1103
	1.07988	1.14142
	1.22299	1.10574
	1.10769	1.17114
	1.12823	1.12893
	1.15133	1.10827
	1.23537	1.19808
	1.21203	1.1379
	1.14562	1.05213
	1.07817	1.08095
	1.0691	1.02271
	0.98145	1.14857
	1.00602	1.17647
	1.07827	1.21739
	1.26837	1.11344
	1.42815	1.15702
	1.14169	1.01225
	1.30714	1.08417
	0.950427	1.11364
	1.0631	1.1157

## Sheet: Figure4F_Nup54_starve
Name	Nup54_fed	Nup54_starved
Median	0.818117	0.721454
First Quartile	0.783969	0.673282
Third Quartile	0.861568	0.763859
				ttest
Data:	0.832	0.682261		8.54054e-50
	0.789116	0.709251
	0.834839	0.665217
	0.832117	0.723121
	0.759022	0.806763
	0.867647	0.686654
	0.900901	0.610505
	0.76455	0.762268
	0.773386	0.76554
	0.879167	0.693989
	0.902036	0.837607
	0.793059	0.666667
	0.759909	0.708831
	0.818868	0.751423
	0.900362	0.725236
	0.822932	0.716341
	0.829401	0.728997
	0.851995	0.746167
	0.860846	0.75895
	0.870031	0.766129
	0.776213	0.702546
	0.838947	0.673038
	0.811733	0.773643
	0.805947	0.859504
	0.836496	0.759633
	0.875981	0.630081
	0.847799	0.739618
	0.761719	0.745595
	0.809055	0.664747
	0.797914	0.837389
	0.850056	0.687117
	0.851752	0.686966
	0.801144	0.837209
	0.866554	0.656216
	0.704514	0.78361
	0.698138	0.70522
	0.754864	0.710098
	0.909375	0.753271
	0.79625	0.745928
	0.976648	0.608167
	0.897281	0.895062
	0.866667	0.744292
	0.939628	0.808105
	0.722295	0.662218
	0.746907	0.915764
	0.797872	0.752714
	0.927419	0.6983
	0.826034	0.75
	0.819835	0.733483
	0.808123	0.776159
	0.809802	0.666073
	0.875335	0.760902
	0.832718	0.616889
	0.837703	0.791897
	0.866769	0.746204
	0.854494	0.776495
	0.781547	0.72191
	0.826923	0.602787
	1.04025	0.669528
	0.775839	0.751981
	0.796148	0.763877
	0.986864	0.713131
	0.85751	0.56687
	0.847969	0.675403
	0.732824	0.785794
	0.903084	0.643599
	0.794271	0.724972
	0.685246	0.710706
	0.814867	0.658537
	0.897233	0.685941
	0.783626	0.912281
	0.8802	0.79845
	0.79878	0.678571
	0.785714	0.680571
	0.791614	0.738547
	0.917722	0.746835
	0.834254	0.794552
	0.811075	0.684211
	0.811346	0.71372
	0.789231	0.690578
	0.770312	0.667025
	0.803922	0.778528
	0.798561	0.781111
	0.791579	0.703704
	0.892608	0.724739
	0.690076	0.721258
	0.806024	0.726506
	0.747702	0.817442
	0.849359	0.750229
	0.954128	0.678495
	0.73038	0.706667
	0.810202	0.738002
	0.742147	0.792424
	0.765668	0.705669
	0.817942	0.757803
	0.907895	0.763807
	0.840213	1.22304
	0.828877	0.767169
	0.846405	0.681102
	0.815126	0.679012
	0.872232	0.731848
	0.761905	0.745267
	0.778481	0.790168
	0.840054	0.675325
	0.77399	0.691781
	0.710976	0.738697
	0.78382	0.69532
	0.75462	0.765782
	0.814194	0.809412
	0.806748	0.68608
	0.895762	0.548485
	0.784416	0.671296
	0.814327	0.732662
	0.870968	0.817505
	0.889465	1.11077
	0.828656	0.722458
	0.865079	0.73753
	0.733173	0.821853
	0.728986	0.947214
	0.853425	0.777913
	0.814545	0.715017
	0.816883	0.707828
	0.853333	0.693649
	0.789916	0.759197
	0.807746	0.687848
	0.816176	0.699408
	0.843521	0.726244
	0.939799	0.765169
	0.8309	0.741307
	0.745685	0.655385
	0.754427	0.784764
	0.833091	0.596032
	0.879234	0.615067
	0.686987	0.661896
	0.795276	0.665289
	0.827051	0.875
	0.812684	0.714646
	0.776451	0.68357
	0.938889	0.641805
	0.826241	0.7241
	0.866102	0.758831
	0.782918	0.778462
	0.803008	0.641791
	0.810651	0.677013
	0.741655	0.637634
	0.818291	0.78125
	0.822828	0.670732
	0.759259	0.779252
	0.94775	0.694444
	0.705357	0.693172
	0.771127	0.750302
	0.767614	0.56211
	0.826014	0.642562
	0.887772	0.694366
	0.802575	0.655311
	0.713647	0.61086
	0.762168	0.732697
	0.762082	0.764778
	0.908093	0.667921
	0.945783	0.978525
	0.769547	0.686382
	0.753959	0.863226
	0.806029	0.663586
	0.726236	0.739526
	0.792642	0.68731
	0.827676	0.663235
	0.906162	0.647843
	0.76569	0.624494
	0.829865	0.704545
	0.763908	0.652597
	0.938438	0.756637
	0.831488	0.665502
	0.888715	0.829091
	0.795414	0.654709
	0.836283	0.709419
	0.785942	0.661871
	1.03226	0.935723
	0.725383	0.658584
	0.85229	0.886827
	0.843308	0.706037
	0.815789	0.694141
	0.828877	0.816888
	0.881072	0.681992
	0.909784	0.634055
	0.801527	0.672237
	0.814417	0.665623
	0.80148	0.674566
	0.824057	0.770903
	0.936407	0.647472
	0.809877	0.761658
	0.840559	0.640964
	1.19149	0.6604
	0.833111	0.790412
	0.715586	0.735165
	0.74283	0.604292
	0.822844	0.694498
	0.820055	0.750248
	0.875	0.782964
	0.768765	0.665625
	0.813988	0.777523
	0.787479	0.637949
	0.821023	0.693041
	0.731364	0.741189
	0.809375	0.6983
	0.844854	0.728856
	0.827273	0.667728
	0.851332	0.792722
	0.87057	0.721649
	0.804742	0.672231
	0.866972	0.748603
	0.903766	0.742489
	0.915646	0.798013
	0.856944	0.680039
	0.733256	0.644995
	0.872059	0.804324
	0.848943	0.620909
	0.693258	0.805882
	0.824019	0.729577
	0.797054	0.727045
	0.747826	0.82807
	0.896389	0.734191
	0.791531	0.923251
	0.796982	0.66524
	0.804904	0.591888
	0.860858	0.767202
	0.991238	0.6308
	0.827703	0.638819
	0.822901	0.738756
	0.863281	0.753247
	0.707921	0.766892
	0.789133	0.694548
	0.808696	0.899568
	0.738407	0.776
	0.789604	0.866142
	0.893506	0.753125
	0.84544	0.564158
	0.798271	0.635772
	0.730947	0.742407
	0.827446	0.68595
	0.8867	0.762346
	0.836957	0.763441
	0.86172	0.716152
	0.69102	0.649538
	0.827225	0.804631
	0.812352	0.644814
	0.843164	0.570815
	0.786685	0.608653
	0.88228	0.799839
	0.811209	0.674015
	0.791009	0.73014
	0.934921	0.66107
	0.792035	0.704036
	0.904054	0.738821
	0.790323	0.713188
	0.712994	0.67035
	0.801966	0.824297
	0.752866	0.675615
	0.774845	0.745299
	0.829404	0.699895
	0.875	0.722222
	0.768405	0.720742
	0.831361	0.6107
	0.816092	0.866957
	0.893466	0.729967
	0.809722	0.712105
	0.711014	0.786932
	0.868852	0.698695
	0.704315	0.73817
	0.883446	0.635926
	0.835007	0.623794
	0.966197	0.741991
	0.847222	0.74902
	0.861111	0.892178
	0.837116	0.851175
	0.886248	0.706145
	0.879464	0.630284
	0.857812	0.727506
	0.762901	0.705281
	0.870293	0.701796
	0.772527	0.733333
	0.884735	0.781217
	0.812779	0.726944
	0.779516	0.764706
	0.825449	0.585028
	0.74655	0.723926
	0.748242	0.779755
	0.817416	0.711349
	0.807736	0.729569
	0.930448	0.693916
	0.747771	0.659341
	0.857947	0.657843
	0.878049	0.69188
	0.796415	0.669725
	0.87415	0.753691
	0.884679	0.811422
	0.88664	0.7
	0.841352	0.689947
	0.744627	0.825619
	0.705277	0.68732
	0.739191	0.804046

## Sheet: Figure4G_Nup133_perm
Name	Nup133_9b_cont	Nup133_9b_perm
Median	1.1308	1.1299
First Quartile	1.0634	1.07543
Third Quartile	1.19844	1.18677
				ttest
Data:	1.11856	1.06285		0.609161
	0.950427	1.03981
	1.15168	1.11074
	1.00655	1.1033
	1.21828	1.21302
	1.11404	1.07661
	1.00321	1.12084
	1.01498	1.155
	1.12064	1.26625
	1.15157	1.22658
	1.11558	1.13345
	1.07131	1.11405
	1.24324	1.1692
	1.20038	1.18609
	1.17518	1.15618
	1.11885	1.21672
	1.0974	1.03495
	1.30714	1.27127
	1.14572	1.04972
	1.09018	0.985567
	1.01042	1.13852
	1.14213	1.21205
	0.997785	1.26653
	1.19588	1.26927
	1.20016	1.03886
	1.03337	1.13865
	1.09475	1.11881
	1.33537	1.11919
	1.0009	1.0383
	1.28269	1.06576
	1.12738	1.23196
	1.28679	1.14689
	1.14093	1.05102
	1.22314	1.15912
	1.07525	1.13046
	1.13127	1.17496
	1.11532	1.19365
	1.21551	1.30357
	1.1123	1.13111
	0.937774	1.24146
	1.17888	1.02976
	1.27677	1.18372
	1.16771	1.21421
	1.14458	1.21655
	1.20271	1.10856
	1.23292	1.2957
	1.0631	1.2118
	1.26837	1.17613
	1.31548	1.14945
	1.04194	1.06053
	1.25895	1.08777
	1.01638	1.11647
	1.20851	1.06051
	1.05403	1.18546
	1.091	1.2049
	1.15311	1.1979
	1.00645	1.06607
	1.22607	0.951533
	1.04111	1.05564
	1.06432	1.13923
	0.969741	1.1064
	1.15905	1.12029
	1.04649	1.14674
	1.22744	1.35642
	1.20309	1.19437
	1.1093	1.1417
	1.04118	1.0855
	1.17743	1.15418
	1.03216	1.14169
	1.18202	1.08615
	1.18364	1.06143
	1.21215	1.15541
	1.12914	0.98045
	1.1315	1.1087
	1.22635	1.11844
	1.16312	1.04357
	1.14373	1.06816
	0.962025	1.05128
	1.27168	1.11056
	0.966492	1.08346
	1.03097	1.0865
	1.15526	1.10814
	1.12403	1.1925
	1.24108	1.03237
	1.06491	1.06138
	0.988362	1.0495
	1.21105	1.05207
	1.1927	1.08803
	1.0335	1.25082
	1.05601	1.25626
	1.05035	1.14344
	1.1495	1.23913
	1.15563	1.12626
	1.03455	1.16969
	1.03968	1.09671
	1.09064	1.20854
	1.09468	1.30355
	1.39127	1.05477
	1.02848	1.14441
	1.29668	1.12083
	0.962145	0.994337
	1.13082	1.19894
	1.21866	1.15261
	1.04264	1.14557
	1.24397	1.13181
	1.04241	1.22739
	1.07817	1.15806
	1.14344	1.13577
	1.08159	1.15004
	1.26337	1.13603
	1.13805	1.07441
	1.20305	1.19806
	1.32731	1.10724
	1.07551	1.10031
	1.07633	1.19707
	1.08134	1.11187
	1.1346	1.2478
	1.34859	1.21649
	1.22162	1.25077
	1.07184	1.09051
	1.17713	1.13833
	1.19954	1.08165
	1.15446	1.07785
	1.11168	1.071
	1.02167	1.13409
	1.23321	1.19656
	1.02814	1.10876
	1.15741	1.16575
	1.14985	1.1844
	1.06474	1.04594
	1.20963	1.10437
	1.20375	1.28188
	1.14252	1.23419
	1.20247	1.20638
	1.03424	1.10491
	1.06954	1.03022
	1.27458	1.16349
	1.12257	1.13642
	1.13328	1.18095
	1.05371	1.31396
	1.19638	1.20833
	1.20609	1.02851
	1.06589	0.994215
	1.14662	1.1983
	1.04907	1.18431
	1.19619	1.07254
	1.17619	1.1
	1.19434	1.09894
	1.20876	1.17055
	1.14427	1.15147
	1.0146	1.22284
	1.15538	1.07871
	1.07827	1.21143
	0.940191	1.05709
	1.14066	1.05066
	1.0676	1.16681
	1.05305	1.20142
	0.975877	1.17758
	1.14169	1.03568
	1.2314	1.22577
	1.15817	1.1675
	1.11445	1.19044
	1.09817	1.08425
	1.12823	1.10615
	1.02811	1.04716
	1.08506	1.02975
	1.21476	1.08666
	0.959069	0.98026
	1.1849	1.16355
	1.18093	1.10858
	1.23537	1.12371
	1.05114	1.19511
	1.23859	1.06542
	1.14562	1.16973
	1.21326	1.04143
	0.991424	1.08412
	1.05085	1.04541
	1.045	1.15881
	0.958947	1.09849
	0.997324	1.12538
	1.06753	1.02604
	1.20399	1.11006
	1.05429	0.992901
	1.1463	1.05854
	1.10025	1.13491
	1.18121	1.08126
	1.16635	1.05562
	1.10761	1.22337
	1.09415	0.977454
	1.13233	1.04782
	1.16409	1.07337
	1.24837	1.18699
	1.1596	1.00164
	1.22831	1.07096
	1.17581	1.07066
	1.05816	1.07076
	1.2101	1.1575
	1.05014	1.15233
	0.924488	1.2912
	0.956219	1.16137
	1.11015	1.09026
	1.12227	1.25915
	1.22024	1.13617
	1.09624	1.06352
	1.00186	1.114
	1.1057	1.12559
	1.27529	1.10256
	1.17421	1.17423
	1.1039	1.18908
	1.25609	1.06032
	0.963235	1.15705
	1.01902	1.23254
	1.18644	1.28445
	1.34159	1.07617
	1.11765	1.17694
	1.04014	1.12093
	1.00941	1.0505
	1.09773	1.07754
	0.97974	1.01318
	1.04797	1.14329
	1.17085	1.30361
	1.125	1.07865
	1.07012	1.00322
	1.1682	1.01398
	1.29945	1.1727
	0.919637	1.17252
	1.09256	1.08131
	1.05619	1.07185
	1.03707	1.01852
	1.21889	1.16809
	1.19026	1.06952
	1.13079	0.955203
	0.99545	1.08514
	1.18075	1.12247
	1.01912	1.10699
	1.42815	1.2972
	1.25338	1.05143
	1.07097	1.02889
	1.10858	1.29955
	1.16507	1.06771
	1.0723	1.11935
	1.23805	1.06174
	1.16031	1.043
	1.33571	1.18799
	1.12916	0.974668
	1.31791	1.13277
	1.05149	1.13732
	1.12845	1.08136
	1.1653	1.30978
	1.04282	1.27829
	1.10769	1.07518
	1.22372	1.21937
	1.31802	1.23071
	1.16239	1.31989
	1.20417	1.28259
	1.26539	1.2063
	1.30501	1.11827
	1.21294	1.12934
	1.17349	1.17705
	1.25765	1.09448
	1.08667	1.23786
	1.12608	1.13714
	1.17751	1.12069
	1.16068	1.15635
	1.15421	1.16433
	1.07586	1.06833
	1.17986	1.04958
	1.07083	1.12934
	1.25894	1.23427
	1.09398	1.20859
	1.18784	1.29442
	1.11386	1.15643
	1.08411	1.20395
	0.978707	1.26293
	1.14856	1.16632
	1.0503	1.18314
	1.08404	1.20049
	1.0657	1.16747
	0.982206	1.09144
	1.07988	1.08523
	1.06449	1.09894
	1.09705	1.138
	1.04272	1.22679
	1.26016	1.0818
	1.07361	1.13562
	1.08826	1.21486
	1.11538	1.08052
	1.15204	1.11212
	1.21488	1.19828
	1.00902	1.19162
	1.169	1.12089
	1.29782	1.06685
	1.13367	1.06139
	1.02087	1.18312
	1.15859	1.10234
	0.971498	1.10928
	1.21382	1.14368
	1.12041	1.09883
	1.19912	1.03659
	1.13941	1.162

## Sheet: Figure4H_Nup54_perm
Name	Nup133_9b_cont	Nup133_9b_cont
Median	0.819461	0.713902
First Quartile	0.783649	0.671417
Third Quartile	0.862169	0.761733
				ttest
Data:	0.824019	0.681363		2.63499e-52
	0.938438	0.677765
	0.851995	0.713881
	0.738281	0.779126
	0.822844	0.684046
	0.866102	1.12088
	0.84544	0.714286
	0.731364	0.661137
	0.839063	0.692241
	0.795276	0.567504
	0.771127	0.709268
	0.892608	0.671574
	0.785714	0.70751
	0.896389	0.705977
	0.909784	0.671533
	0.693258	0.776056
	0.893466	0.812022
	0.879167	0.649741
	0.782828	0.761737
	0.783648	0.789357
	0.936599	0.708366
	0.818722	0.639064
	0.811733	0.677043
	0.936407	0.704036
	0.832073	0.727536
	0.848117	0.838483
	0.765281	0.67511
	0.76455	0.686681
	0.840054	0.686375
	0.909375	0.688058
	0.754427	0.662694
	0.887772	0.727848
	0.831488	0.765414
	0.779395	0.746305
	0.774845	0.745614
	0.770312	0.726415
	0.796982	0.75
	0.956127	0.781553
	0.838947	0.607373
	0.878049	0.597015
	0.734192	0.565114
	0.705665	0.648723
	0.954128	0.748853
	0.820055	0.707151
	0.783626	0.732612
	0.797054	0.679095
	0.79878	0.789157
	0.762168	0.615385
	0.792642	0.68331
	0.8867	0.963855
	0.895762	0.674419
	0.801178	0.732558
	0.837116	0.723225
	0.906162	0.787724
	0.85127	0.673737
	0.850056	0.620921
	0.779516	0.745217
	0.829865	0.658754
	0.769547	0.64369
	0.811209	0.75766
	0.772527	0.721172
	0.907895	0.652023
	0.796415	0.739941
	0.875	0.781288
	0.817416	0.768928
	0.83175	0.640183
	0.791531	0.866564
	0.809802	0.722853
	0.834921	0.733858
	0.85229	0.617792
	0.902036	0.71542
	0.908719	0.713904
	0.870031	0.671378
	0.761635	0.57478
	0.841352	0.641228
	0.78382	0.722372
	0.835007	0.792049
	0.821023	0.702013
	0.884679	0.704692
	0.796148	0.660271
	0.761719	0.826045
	0.825449	0.723447
	0.810202	0.97237
	0.848617	0.785471
	0.789231	0.761719
	0.797914	0.680827
	0.794271	0.722949
	0.852433	0.699239
	0.782918	0.714422
	0.789272	0.674208
	0.807646	0.864327
	0.77399	0.775928
	0.828877	0.681275
	0.789536	0.813037
	0.886248	0.633609
	0.872232	0.660079
	0.811617	0.706876
	0.7882	0.704433
	0.791444	0.69129
	0.966197	0.725714
	0.866972	0.689349
	0.740346	0.664528
	0.826241	0.663286
	0.843521	0.748597
	0.82134	0.773014
	0.826034	0.793792
	0.815789	0.696217
	0.832117	0.601932
	0.827446	1.00219
	0.791579	0.680036
	0.801274	0.783455
	0.881072	0.719873
	0.870293	0.753874
	0.921023	0.670732
	0.798561	0.774026
	0.828656	0.774114
	0.705357	0.755486
	0.732824	0.752663
	0.718987	0.743532
	1.03226	0.882635
	0.888715	0.795699
	0.939628	0.713415
	0.903766	0.71813
	0.801003	0.789011
	0.781547	0.755896
	0.79625	0.760383
	0.834839	0.741023
	0.768362	0.598053
	0.816092	0.720506
	0.778481	0.626362
	0.865079	0.624494
	0.860858	0.82139
	0.825977	0.861757
	0.88228	0.902669
	0.815126	0.700592
	0.762082	0.724059
	0.851852	0.857531
	0.785973	0.655623
	0.858793	0.674174
	0.86172	0.592593
	0.835498	0.811798
	0.813988	0.660465
	0.829404	0.569892
	0.785942	0.703829
	0.853333	0.782609
	0.712994	0.624105
	0.793059	0.881988
	0.883446	0.763308
	0.75462	0.685323
	0.840559	0.673123
	0.809722	0.784543
	0.764622	0.770721
	0.924188	0.789009
	0.806034	0.810458
	0.69186	0.688926
	0.747826	0.684063
	0.840054	0.70255
	0.972299	0.728485
	0.730947	0.711507
	0.826014	0.761364
	0.8309	0.73641
	0.854575	0.816624
	0.798271	0.607542
	0.766117	0.706531
	0.754864	0.786603
	0.869792	0.918999
	0.87057	0.836167
	0.822901	0.764411
	0.915646	0.714422
	0.810651	0.80148
	0.775839	0.737024
	0.745685	0.596
	0.846405	0.853731
	0.938889	0.69863
	0.726236	0.783688
	0.791614	0.687173
	0.851752	0.635209
	0.701254	0.713491
	0.8331	0.684659
	0.833111	0.606651
	0.822115	0.784826
	0.827225	0.669872
	0.797403	0.753623
	0.843164	0.789174
	0.827177	0.658155
	0.814867	0.726172
	0.986864	0.662252
	0.934921	0.64918
	0.760743	0.685936
	0.866769	0.72093
	0.849083	0.787778
	0.761905	0.646353
	0.818291	0.7139
	0.883309	0.58215
	0.836957	0.656433
	0.988287	0.641951
	1.04025	0.75656
	0.807736	0.658501
	0.728986	0.759868
	0.737745	0.637647
	0.767253	0.772727
	0.862319	0.727536
	0.768765	0.660282
	0.806024	0.690816
	0.976648	0.707657
	0.868056	0.654167
	0.930448	0.845336
	0.827676	0.7369
	0.747771	0.773504
	0.798305	0.826087
	0.866667	0.792453
	0.806029	0.697721
	0.762901	0.730693
	0.875335	0.649943
	0.848943	0.787834
	0.738407	0.674084
	0.826923	0.728793
	0.841441	0.749025
	0.88664	0.639604
	0.741797	0.71409
	0.918719	0.754848
	0.854494	0.726115
	0.739184	0.710769
	0.739745	0.609929
	0.972727	0.617918
	0.843308	0.657522
	0.852055	0.66858
	0.885749	0.751269
	0.789916	0.738798
	0.715586	1.0471
	0.804904	0.674004
	0.927419	0.875318
	0.805947	0.863109
	0.733256	0.691128
	0.789604	0.632497
	0.807692	0.667543
	0.704315	0.622438
	0.840213	0.65102
	0.751323	0.708381
	0.840728	0.726531
	0.920583	0.741353
	0.698138	1.04086
	0.806109	0.696941
	0.816464	0.594509
	0.823353	0.806162
	0.867647	0.641392
	0.74283	0.705094
	0.762677	0.736597
	0.918966	0.776575
	0.857947	0.597516
	0.775616	0.591923
	0.725383	0.681704
	0.789133	0.733333
	0.770115	0.693548
	0.786685	0.55597
	0.848568	0.729694
	0.686987	0.735765
	0.812352	0.758427
	0.776451	0.692794
	0.822932	0.696443
	0.783654	0.563265
	1.19149	0.732484
	0.804054	0.627178
	0.795217	0.640853
	0.991238	0.742731
	0.857812	0.697619
	0.87165	0.709849
	0.759259	0.674227
	0.812684	0.946595
	0.789116	0.571157
	0.883162	0.970082
	0.814194	0.757848
	0.885434	0.750653
	0.870968	0.816748
	0.768405	0.754973
	0.809375	0.708366
	0.814327	0.742623
	0.85751	0.766698
	0.932665	0.829135
	0.768605	0.716319
	0.801527	0.770414
	0.752866	0.639569
	0.814545	0.696629
	0.759909	0.68018
	0.783105	0.757123
	0.829401	0.672167
	0.87415	0.660976
	0.879464	0.676633
	0.809079	0.624542
	0.818868	0.695704
	0.748242	0.867974
	0.963087	0.728135
	0.834254	0.898485
	0.811075	0.661036
	0.865229	0.720736
	0.761298	0.62987
	0.816883	0.684124
	0.828877	0.739082
	0.94775	0.80814
	0.791009	0.636364

## Sheet: Figure4I_Nup133_lepB
Name	Nup133_9b_cont	Nup133_9b_leptB
Median	1.08398	1.07974
First Quartile	1.02479	1.01203
Third Quartile	1.135	1.13472
				ttest
Data:	1.26103	1.06758		0.44955
	0.952444	1.01705
	1.11305	1.16226
	1.29537	0.938492
	1.11647	0.961224
	1.21992	0.995406
	1.04038	0.958932
	1.21532	1.24103
	1.03878	0.950735
	1.17934	0.988889
	1.16936	0.966581
	1.09016	1.05561
	1.15838	1.12024
	1.02309	1.14303
	1.08651	1.06752
	1.01838	1.12752
	1.1824	1.0034
	1.21878	0.99897
	1.00797	1.0074
	1.04329	0.918197
	0.993639	1.12324
	1.00345	0.979705
	1.12786	1.15128
	1	1.05924
	1.0593	1.00115
	1.12435	1.08447
	1.1208	1.01192
	1.1121	1.23857
	0.991453	0.948083
	0.993103	1.11026
	0.962926	1.0929
	1.00727	1.0246
	1.27785	1.15501
	1.14418	1.12568
	1.13224	1.12439
	1.12089	1.13435
	1.00767	1.13484
	1.10974	1.04517
	1.13326	0.960481
	1.09677	0.834711
	1.07491	0.968174
	1.0011	0.933824
	0.89449	1.28627
	1.10832	0.991843
	1.18644	1.14711
	1.06002	1.09231
	1.09834	1.01604
	1.21888	1.07801
	1.01804	1.08221
	0.961312	1.15674
	1.18281	1.03905
	1.00302	1.16393
	0.90917	1.1029
	1.12245	0.996845
	1.03526	1.11429
	1.1069	1.04304
	0.900442	1.00363
	1.1242	0.933333
	1.1045	1.07834
	1.06189	1.09427
	1.05372	1.09225
	1.10419	0.953719
	1.08676	1.08815
	1.18507	1.06179
	0.909483	1.0732
	1.05591	1.16085
	0.980747	1.15644
	1.15354	1.16758
	1.23207	1.12706
	1.0142	1.13758
	1.17862	1.07446
	1.14651	1.20945
	1.06684	1.26167
	1.0962	0.888649
	1.2114	1
	0.92689	1.19036
	1.08166	1.14933
	1.16027	1.23045
	1.13103	1.07388
	1.18623	1.22152
	1.03348	1.06944
	1.00778	1.04809
	1.0519	1.04149
	1.1959	0.95825
	1.01628	1.12893
	1.13797	1.09416
	1.06308	1.27003
	1.03226	1.21848
	1.11614	1.16145
	1.08641	1.01377
	1.1097	1.01822
	1.10259	0.974958
	1.05671	1.05993
	1.10013	1.03456
	1.01276	0.992495
	1.05561	1.14693
	1.10067	1.24218
	1.17817	0.974961
	1.21875	1.18391
	1.02648	1.12963
	1.02757	1.08551
	1.08267	1.21429
	1.04623	0.963351
	1.12131	1.01124
	1.07099	1.22444
	1.10093	1.06583
	0.989298	1.08992
	1.17867	1.03435
	1.08409	1.09075
	1.17519	1.06695
	1.10027	1.12876
	1.02311	1.02853
	1.22951	0.984305
	1.08444	1.05074
	1.10047	1.12674
	1.02422	1.05199
	1.00346	1.09117
	1.13873	1.0349
	1.18209	1.04397
	1.11812	1.09598
	0.997693	0.939709
	1.14699	1.13763
	1.22985	1.09114
	1.19545	0.997389
	1.19441	0.94614
	1.06888	0.973984
	1	1.07721
	0.991261	1.28292
	0.986755	1
	1.10155	0.996798
	1.02308	1.07216
	1.01019	1.11035
	1.03518	0.92397
	1.07212	1.03749
	1.05612	0.796434
	1.16434	0.847328
	1.10368	1.12453
	1.18841	1.11239
	1.23647	1.25069
	1.11942	1.01395
	1.24948	1.04127
	1.02839	1.06499
	1.13079	0.971831
	1.13091	1.05075
	1.11311	1.08453
	1.08323	1.04479
	1.10423	1.06151
	1.0098	1.24922
	1.06455	1.12944
	1.07711	1.02825
	1.06492	1.17283
	1.24775	1.24751
	1.11634	0.939331
	1.03794	1.07986
	1.06585	1.17054
	1.06711	1.21911
	0.953922	1.31839
	1.03591	1.11631
	1.13271	1.19922
	1.07393	0.867365
	1.17818	1.15395
	1.09162	0.985507
	1.0237	1.04077
	1.05066	1.33625
	1.03916	1.15134
	1.0492	1.07012
	1.12313	1.00456
	1.03432	1.00361
	1.13659	1.1554
	1.14317	1.02738
	1.12984	1.11456
	1.18478	1.01754
	1.19506	0.996024
	1.05989	1.1044
	1.13531	0.952429
	1.08408	1.27986
	0.963855	1.16284
	0.951323	1.12428
	1.03448	1.13387
	1.13278	1.08688
	1.11111	1.08571
	1.15145	1.00198
	1.13038	1.10461
	1.10413	1.13021
	1.15217	0.99685
	1.01265	1.41577
	1.14186	1.17476
	1.04617	0.931005
	1.14765	1.1952
	1.0739	1.00115
	1.01175	1.07203
	1.08889	1.0162
	1.08416	1.11585
	1.14766	1.05207
	1.01316	1.05696
	1	1.01237
	1.00509	1.06294
	1.14217	1.11976
	1.07711	1.04158
	0.912959	1.21227
	1.18929	1.03209
	1.20943	1.22837
	1.02918	1.08143
	1.24811	1.01389
	1.21911	1.12603
	1.09725	0.963702
	1.12688	1.1759
	1.09091	1.14039
	1.12269	1.11364
	1.08857	1.03785
	0.983791	0.997146
	1.17735	1.03826
	0.95567	0.965974
	1.09615	1.08059
	1.07305	1.0497
	1.03614	0.975564
	1.11965	0.92931
	1.18385	1.10243
	1.29733	1.10446
	1.0237	1.07232
	1.01393	1.03976
	1.07478	0.977311
	0.907346	0.963585
	1.09766	1.12818
	1.10312	1.09192
	1.07804	1.02158
	1.00454	1.09153
	1.15299	0.993421
	1.13684	1.08249
	1.05516	1.27866
	1.09413	0.998095
	1.09287	1.10417
	1.02023	1.03777
	0.996681	0.973451
	0.9877	1.03536
	1.09353	1.04702
	1.00705	1.08342
	1.0744	1.10709
	1.01479	1.09653
	0.976608	0.987675
	1.07622	1.08343
	1.15082	1.16733
	1.06789	1.12344
	1.25466	1.06312
	1.08873	1.19833
	1.07612	1.12326
	1.08389	1.03608
	1.25922	1.09221
	1.01663	1.20528
	1.02048	0.98521
	1.15936	1.2381
	1.00371	1.05666
	1	1.09384
	1.05152	0.969349
	1.05621	1.2202
	0.913368	1.33333
	0.953405	0.953982
	1.09888	0.960369
	0.928879	1.19407
	1.18026	1.04255
	1.20682	1.15319
	1.06888	1.12202
	1.08219	1.0181
	1.13115	1.1393
	1.01968	1.13629
	1.06952	1.06784
	1.12653	1.22768
	1.05653	0.995313
	1.07309	1.19393
	1.03531	1.13193
	1.07886	1.10469
	0.9942	1.11158
	1.01396	1.27162
	1.14971	0.989264
	1.1738	1.10035
	1.13692	0.8
	1.08206	1.1294
	1.03085	1.08566
	1.19194	1.09458
	1.03927	1.17474
	1.08646	1.06154
	1.16617	1.02998
	1.07701	1.27903
	1.12217	0.959543
	1.17359	1.19706
	1.03869	1.17935
	0.970113	1.2413
	1.08535	0.803545
	1.01401	1.21341
	0.961661	1.11628
	1.01367	1.05439
	1.21266	1.15011
	1.13406	1.07773
	1.05767	1.00328
	1.07585	1.10661
	1.18758	1.15028
	1.07032	1.07986
	1.01965	1.29316
	1.03929	1.05411
	0.996262	1.07962

## Sheet: Figure4J_Nup54_lepB
Name	Nup54_cont	Nup54_lepB
Median	0.793078	0.754033
First Quartile	0.749787	0.719402
Third Quartile	0.843048	0.806175
				ttest
Data:	0.770459	0.87092		2.30577e-09
	0.767399	0.740443
	0.814748	0.780303
	0.854671	0.684906
	0.86733	0.844488
	0.827368	0.810376
	0.697333	0.728324
	0.764706	0.765835
	0.840149	0.686996
	0.856354	0.687081
	0.836864	0.706633
	0.786136	0.700775
	0.848529	0.732496
	0.794118	0.716463
	0.707101	0.859397
	0.86119	0.842723
	0.793103	0.840304
	0.863918	0.688406
	0.758468	0.8487
	0.84728	0.945946
	0.913043	0.838398
	0.806104	0.823964
	0.860129	0.768571
	0.827529	0.873171
	0.797959	0.968701
	0.836043	0.791845
	0.739069	0.737705
	0.703013	0.726644
	0.82241	0.688013
	0.675347	0.597594
	0.739726	0.696629
	0.798331	0.799539
	0.8482	0.746124
	0.770115	0.692529
	0.651515	0.849711
	0.819383	0.708163
	0.793893	0.737327
	0.798595	0.751269
	0.899676	0.713355
	0.85514	0.775229
	0.716556	1.07923
	0.872818	0.743287
	0.79223	0.811232
	0.783265	0.720094
	0.816248	0.828063
	0.798403	0.736948
	0.878049	0.810044
	0.931559	0.902196
	0.796134	0.809628
	0.740409	0.745695
	0.764438	0.657955
	0.742044	0.651663
	0.757576	0.725998
	0.749201	0.665414
	0.784074	0.807229
	0.70088	0.827815
	0.777778	0.785034
	0.934837	0.757829
	0.78119	0.77451
	0.838384	0.744144
	0.972686	0.776869
	0.745295	0.762355
	0.840246	0.797441
	0.714685	0.785223
	0.795207	0.849099
	0.79564	0.816705
	0.772789	0.847162
	0.75871	0.663573
	1.05435	0.8225
	0.770218	0.789735
	0.75969	0.793249
	0.807095	0.813142
	0.756303	0.798283
	0.810235	0.836111
	0.741899	0.809711
	0.804494	0.830033
	0.787611	0.742931
	0.881356	0.753505
	0.801932	0.804388
	0.82963	0.82874
	0.726804	0.795848
	0.84456	0.801471
	0.839009	0.733945
	0.861564	0.780239
	0.834437	0.747178
	0.890127	0.775599
	0.688917	0.758813
	0.694964	0.692308
	0.875789	0.722149
	0.744186	0.723017
	0.871074	0.74433
	0.748106	0.748697
	0.854734	0.743666
	0.644737	0.802057
	0.732484	0.729069
	0.788671	0.850515
	0.852207	0.805349
	0.687679	0.8921
	0.872017	0.805369
	0.778788	0.8192
	0.943355	0.964552
	0.759768	0.557078
	0.859091	0.683578
	0.726859	0.767628
	0.881188	0.798995
	0.666955	0.823129
	0.726519	0.742115
	0.764468	0.627551
	0.944882	0.67031
	0.785948	0.738281
	1.00481	0.982979
	0.744615	0.633374
	1.03655	0.842803
	0.651515	0.756391
	0.764618	0.747872
	0.780165	0.752475
	0.794948	0.76875
	0.700528	0.619048
	0.758065	0.715778
	0.798206	0.72808
	0.744711	0.778473
	0.753794	0.77763
	0.843982	0.756839
	0.746711	0.776094
	0.866366	0.731481
	0.690998	0.707071
	0.73588	0.730159
	0.881007	0.731047
	0.950673	0.684476
	0.710579	0.75737
	0.747475	0.750538
	0.956322	0.771887
	0.654917	0.692194
	0.77095	0.700611
	0.722426	0.846682
	0.72524	0.852174
	0.834215	0.655048
	0.753954	0.799163
	0.72082	0.741026
	0.722458	0.656497
	0.866667	0.75365
	0.711111	0.680788
	0.747148	0.784698
	0.706878	0.765661
	0.80597	0.702873
	0.817204	0.835897
	0.816609	0.746535
	0.785714	0.646123
	0.834123	0.791583
	0.89168	0.765482
	0.816058	0.733822
	0.729134	0.642105
	0.788401	0.872768
	0.820041	0.708949
	0.765306	0.783969
	0.803604	0.792488
	0.800439	0.718331
	0.922374	0.692964
	0.863208	0.69377
	0.753363	0.746946
	0.751543	0.731801
	0.759924	0.872685
	0.878924	0.764211
	0.808696	0.866242
	0.974359	0.823762
	0.696268	0.746774
	0.756705	0.687603
	0.73384	0.783217
	0.772973	0.712766
	0.754545	0.64386
	0.824759	0.838897
	0.831711	0.728205
	0.91684	0.678994
	0.870647	0.728111
	0.865801	0.767075
	0.837438	0.84596
	0.773038	0.685558
	0.76087	0.843798
	0.716253	0.689024
	0.753957	0.788168
	0.797297	0.701556
	0.692754	0.744102
	0.753372	0.806338
	0.760908	0.705479
	0.763066	0.747841
	0.87884	0.745958
	0.718016	0.71161
	0.91601	0.735849
	0.735736	0.786217
	0.774786	0.737124
	0.818851	0.668262
	0.753425	0.750462
	0.826421	0.801818
	0.893588	0.928926
	0.832861	0.977528
	0.682488	0.765903
	0.688963	0.736318
	0.70137	0.649815
	0.81558	0.711507
	0.819599	0.757937
	0.753264	0.698055
	0.880412	0.780684
	0.716049	0.763274
	0.876033	0.754417
	0.822946	0.766409
	0.765957	0.684112
	0.875895	0.706402
	0.748884	0.72807
	0.806678	0.741772
	0.760512	0.815873
	0.810526	0.665816
	0.958333	0.786096
	0.724832	0.698083
	0.845411	0.686357
	0.811275	0.82167
	0.861915	0.873096
	0.809322	0.918797
	0.760252	0.709145
	0.738318	0.691959
	0.703039	0.788644
	0.786344	0.652824
	0.742115	0.809917
	0.74175	0.764405
	0.85098	0.745267
	0.787056	0.7897
	0.83887	0.715803
	0.805357	0.731317
	0.828338	0.734323
	0.776808	0.746421
	0.741497	0.808099
	0.788945	0.898263
	0.8083	0.812693
	0.802198	0.82582
	0.775444	0.803653
	0.783582	0.844991
	0.700284	0.777778
	0.925926	0.775629
	0.785589	0.743134
	0.710332	0.7657
	0.773077	0.722913
	0.684211	0.857471
	1.05386	0.713889
	0.798861	0.749485
	0.806548	0.731532
	0.803977	0.726708
	0.907731	0.725722
	0.866397	0.715847
	0.792512	0.715895
	0.780731	0.748245
	0.980519	0.846523
	0.717808	0.747036
	0.725926	0.760623
	0.675591	0.801619
	0.809872	0.662513
	0.770972	0.84
	0.828704	0.805687
	0.874791	0.756955
	0.892982	0.820755
	0.788686	0.737918
	0.912833	0.761614
	0.82852	0.719821
	0.818018	0.713163
	0.733634	0.914089
	0.769106	0.72929
	0.781525	0.672381
	0.802521	0.75153
	0.792722	0.77474
	0.890756	0.740964
	0.817869	0.901269
	0.867238	0.765445
	0.695447	0.766055
	0.821589	0.715873
	0.853503	0.786082
	0.960494	0.745981
	0.770787	0.847966
	0.808081	0.7584
	0.771903	0.842301
	1	0.727273
	0.825279	0.762279
	0.769124	0.659091
	0.782473	0.746898
	0.774882	0.819887
	0.824959	0.701318
	0.717241	0.719262
	0.933174	0.809969
	0.925301	0.760675
	0.90201	0.747253
	0.736749	0.744884
	0.690936	0.804006
	0.846482	0.695804
	0.7443	0.821355
	0.83878	0.928205
	0.752013	0.637383
	0.714286	0.727564
	0.749141	0.716687
	0.758377	0.899756
	0.789588	0.626072
	0.797802	0.905797
	0.793054	0.749487
	0.972851	0.910112

## Sheet: Figure4K_Nup133_DNRan
Name	Nup133_9b_cont	Nup133_9b_leptB
Median	1.1892	1.19374
First Quartile	1.12928	1.11764
Third Quartile	1.23881	1.25789
				ttest
Data:	1.07624	1.06287		0.615766
	1.19672	1.2594
	1.15917	0.955213
	1.14406	1.06844
	1.22574	1.09503
	1.24441	1.23425
	1.20457	1.10843
	1.13866	1.2468
	1.23509	1.13869
	1.02896	1.19311
	1.21011	1.08223
	1.12898	1.1326
	1.18475	1.17056
	1.21916	1.22122
	1.17058	1.08376
	1.15785	1.19362
	1.24589	1.27885
	1.27036	1.08449
	1.23688	1.13808
	1.2246	1.11616
	1.21235	1.34238
	1.14159	1.17966
	1.21501	1.05449
	1.13323	1.08315
	1.29035	1.25871
	1.14774	1.09146
	1.30588	1.22769
	1.16589	1.29162
	1.22896	1.04259
	1.267	1.33204
	1.3031	1.39526
	1.28203	1.04226
	1.20845	1.07884
	1.23333	1.27302
	1.26437	1.19437
	1.1735	1.34708
	1.20016	1.18762
	1.2873	1.0586
	1.22663	1.18124
	1.17217	1.2109
	1.25778	1.30324
	1.18626	1.18683
	1.34573	1.11817
	1.18519	1.09841
	1.2486	1.10744
	1.20494	1.30335
	1.0195	1.04227
	1.19738	1.16806
	1.02609	1.09252
	1.16212	1.32699
	1.23364	1.02852
	1.1962	1.1141
	1.19791	1.08747
	1.18619	1.22973
	1.31259	1.30746
	1.16	1.3294
	1.11086	1.05287
	1.15783	1.28561
	1.02168	1.34338
	1.14785	0.996092
	1.25522	1.24903
	1.16759	1.17191
	1.23342	1.02794
	1.14955	1.09853
	1.19301	1.25966
	1.2513	1.28555
	1.05	1.23821
	1.25123	1.27032
	1.19101	1.14186
	1.21527	1.16165
	1.21693	1.16384
	1.19676	1.18682
	1.33487	1.10613
	1.1046	1.15616
	1.11816	1.3151
	1.1503	1.20048
	1.33206	1.24981
	1.15205	1.21077
	1.37019	1.21288
	1.27997	1.07605
	1.01989	1.23644
	1.23331	1.31649
	1.10029	1.12303
	1.23472	1.20158
	1.25687	1.21583
	1.22315	1.22572
	1.09565	1.15125
	1.23421	1.06433
	1.19039	1.35802
	1.10189	1.31617
	1.11422	1.18385
	1.23406	1.27051
	1.16112	1.33399
	1.13941	1.26071
	1.16679	1.07706
	1.2029	1.31051
	1.18337	1.27074
	1.10164	1.11033
	1.12508	1.16627
	1.22379	1.18598
	1.24482	1.39169
	1.28619	1.07429
	1.11898	1.19899
	1.29403	1.21551
	1.09933	1.14007
	1.25548	1.10255
	1.15147	1.1293
	1.18715	1.36642
	1.3803	1.09364
	1.19929	1.20426
	1.22655	1.18944
	1.10607	1.18043
	1.1602	1.23146
	1.23841	1.19518
	1.10994	1.25403
	1.10438	1.31387
	1.04319	1.30995
	1.15744	1.02999
	1.21313	1.0492
	1.13087	1.09447
	1.12162	1.2055
	1.15188	1.20222
	1.08065	1.19901
	1.2051	1.29795
	1.09631	1.24477
	1.11671	1.3327
	1.08563	1.11477
	1.11814	1.15789
	1.23509	1.26849
	1.1872	1.20746
	1.25945	1.14826
	1.13064	1.17951
	1.29412	1.30055
	1.22784	1.19549
	1.25125	1.26225
	1.05564	1.16923
	1.16228	1.39282
	1.22623	1.16593
	1.18778	1.2713
	1.16655	1.13358
	1.21838	1.2539
	1.16265	1.23193
	1.32733	1.24719
	1.32775	1.09958
	1.02826	1.11889
	1.188	1.17717
	1.17494	1.18045
	1.14244	1.21956
	1.21955	1.05659
	1.18477	1.17095
	1.2157	1.20188
	1.12443	1.05729
	1.24173	1.37217
	1.10334	1.00436
	1.2952	1.17836
	1.39615	1.22624
	1.24246	1.2554
	1.2314	1.18907
	1.25246	1.07212
	1.19742	1.1106
	1.1134	1.29645
	1.22837	1.05468
	1.15798	1.25444
	1.12832	1.28949
	1.22033	1.13316
	1.20165	1.29198
	1.14568	1.16487
	1.2489	1.16649
	1.24532	1.10533
	1.25799	1.09154
	1.17982	1.1703
	0.979973	1.20182
	1.07937	1.27674
	1.19838	1.20505
	1.20788	1.29362
	1.19904	1.13112
	1.09452	1.16989
	1.16089	1.02135
	1.05026	1.18841
	1.11138	1.02232
	1.07744	1.27729
	1.2212	1.17817
	1.1771	1.13147
	1.05855	1.13541
	1.12592	1.35498
	1.24775	1.28924
	1.07098	1.11746
	1.28926	1.25451
	1.30329	1.2525
	1.35549	1.30939
	1.0873	1.11893
	1.12222	1.09738
	1.12307	1.13559
	1.11918	1.18689
	1.2498	1.20992
	1.196	1.13085
	1.36644	1.16051
	1.08711	1.14462
	1.33643	1.09578
	1.27684	1.28162
	1.14357	1.21432
	1.24293	1.21684
	1.14715	1.07672
	1.19899	1.28438
	1.1231	1.11606
	1.05841	1.09503
	1.12006	1.0989
	1.08417	1.31886
	1.16547	1.16512
	1.30947	1.18358
	1.12053	1.0771
	1.09427	1.13106
	1.19451	1.2723
	1.12464	1.19142
	1.27293	1.1829
	1.02714	1.22279
	1.17516	1.22675
	1.02984	1.04105
	1.24	1.20468
	1.28068	1.00363
	1.25116	1.22447
	1.22497	1.20048
	1.27622	1.23551
	1.17879	1.29558
	1.3228	1.2153
	1.36716	1.27895
	1.12231	1.33315
	1.28734	1.2207
	1.09694	1.09339
	1.19376	1.22366
	1.20168	1.09346
	1.24882	1.28571
	1.18543	1.13511
	1.10998	1.32124
	1.21199	1.22785
	1.13327	1.19386
	1.17489	1.21233
	1.21736	1.12269
	1.04758	1.16209
	1.12186	1.23944
	1.17825	1.29566
	1.1453	1.12641
	1.06457	1.4269
	1.1525	1.2313
	1.22458	1.2202
	1.23178	1.24835
	1.33982	1.21492
	1.05508	1.19712
	1.24863	1.21285
	1.17089	1.15064
	1.1317	1.20776
	1.20624	1.20554
	1.0788	1.13348
	1.13447	1.17031
	1.20811	1.33532
	1.14715	0.984488
	1.27432	1.15773
	1.20947	1.07907
	1.18709	1.299
	1.03216	1.28521
	1.23671	1.08366
	1.08677	1.10458
	1.24935	1.17309
	1.22644	1.25543
	1.21888	1.0627
	1.28852	1.06162
	1.14397	1.35856
	1.21108	1.26352
	1.19385	1.34417
	1.10638	1.03525
	1.25941	1.22325
	1.0883	0.993936
	1.2862	1.10692
	1.38404	1.31838
	1.15047	1.17717
	1.2537	1.19985
	1.24029	1.18138
	1.04369	1.22499
	1.23634	1.2086
	1.16952	1.08768
	1.32132	1.34601
	1.23566	1.21922
	1.29268	1.06452
	1.35692	1.28147
	1.06009	1.16632
	1.17264	1.09845
	1.32095	1.243
	1.17213	1.28132
	1.14895	1.15848
	1.23895	1.18683
	1.06593	1.33333
	1.2995	1.29167
	1.18637	1.07967
	1.07955	1.36368
	1.16563	1.22487
	1.23071	1.2396
	1.17945	1.26219
	1.0598	1.12605
	1.13016	1.19649
	1.18268	1.40111

## Sheet: Figure4L_Nup54_DNRan
Name	Nup54_cont	Nup54_lepB
Median	0.802	0.764401
First Quartile	0.749351	0.721376
Third Quartile	0.852984	0.802588
				ttest
Data:	0.712681	0.708375		4.02224e-11
	0.759241	0.792896
	0.723127	0.818822
	0.74613	0.779984
	0.712437	0.686983
	0.806592	0.821488
	0.793554	0.70566
	0.782567	0.687805
	0.928793	0.720535
	0.708711	0.74
	0.709046	0.741176
	0.712575	0.703364
	0.780347	0.766852
	0.857975	0.739185
	0.843972	0.870764
	0.778768	0.772302
	0.813559	0.854949
	0.819167	0.734387
	0.767109	0.774194
	0.883614	0.75835
	0.898719	0.783519
	0.743744	0.84196
	0.758947	0.731565
	0.734979	0.716374
	0.77451	0.995633
	0.796309	0.886085
	1.08812	0.75691
	0.799275	0.689709
	0.728882	0.835564
	0.748523	0.798151
	0.893037	0.700896
	0.812444	0.768669
	0.80154	0.693154
	0.834571	0.640089
	0.774763	0.751778
	0.940813	0.77551
	0.712037	0.702889
	0.747187	0.667805
	0.89101	0.910819
	1.03114	0.741185
	0.810156	0.763855
	0.711779	0.847804
	0.823289	0.85213
	0.791847	0.726592
	0.754443	0.715741
	0.875969	0.776252
	1.03158	0.718455
	0.747005	0.829662
	0.677885	0.764344
	0.719462	0.789343
	0.868421	0.859517
	0.852998	0.820809
	0.89892	0.715611
	0.786756	0.791098
	0.818598	0.773307
	0.780616	0.849402
	0.816938	0.776777
	0.772139	0.775274
	0.766667	0.748053
	0.799324	0.762339
	0.722222	0.817067
	0.683178	0.742784
	0.745704	0.724829
	0.820822	0.696734
	0.745965	0.772783
	0.85694	0.735724
	0.75	0.832755
	0.743415	0.686073
	0.743671	0.738753
	0.773585	0.644657
	0.791295	0.823529
	0.937182	0.752336
	0.730085	0.914946
	0.848135	0.699697
	0.726091	0.761498
	0.722709	0.834975
	0.782235	0.904255
	0.860981	0.704545
	0.677083	0.728433
	0.943662	0.760981
	0.855308	0.779423
	0.756181	0.758716
	0.846863	0.786229
	0.849295	0.701843
	0.828283	0.783988
	0.712614	0.89604
	0.704619	0.734897
	0.766618	0.76255
	0.732936	0.797115
	0.702036	0.811881
	0.755467	0.733859
	0.798472	0.590042
	0.849582	0.821173
	0.891589	0.83949
	0.723829	0.841924
	0.841257	0.724058
	0.844278	0.859322
	0.880383	0.73777
	0.772134	0.662399
	0.790868	0.740282
	0.821773	0.7023
	0.868819	0.921875
	0.860791	0.779251
	0.740458	0.756757
	0.85046	0.633843
	0.835714	0.669341
	0.787705	0.612316
	0.751244	0.761494
	0.897025	0.657514
	0.715453	0.825978
	0.836016	0.829787
	0.838608	0.750506
	0.795626	0.886834
	0.842834	0.698251
	0.809482	0.761722
	0.749029	0.819569
	0.781709	0.791475
	0.932256	0.833741
	0.740072	0.832442
	0.827652	0.646704
	0.835851	0.814343
	0.720177	0.782576
	0.787825	0.662097
	0.99159	0.682665
	0.862581	0.721384
	0.809486	0.819504
	0.806705	0.940987
	1.02431	0.729841
	0.876392	0.907417
	0.725821	0.708633
	0.83484	0.790735
	0.871773	0.71328
	0.673128	0.715324
	0.788162	0.762415
	0.775081	0.728058
	0.788812	0.734431
	0.844184	0.668007
	0.902873	0.925154
	0.807802	0.765125
	0.737824	0.793692
	0.867833	0.802583
	0.814857	0.803304
	0.635945	0.833606
	0.77551	0.778293
	0.802461	0.673962
	0.92577	0.672727
	0.764837	0.810078
	0.903433	0.658228
	0.92034	0.720576
	0.796966	0.714286
	0.84528	0.697747
	1.16333	0.679567
	0.793103	0.784143
	0.712171	0.783166
	0.712838	0.761831
	0.756098	0.764134
	0.860949	0.906847
	0.929116	0.746622
	0.829218	0.74334
	0.789362	0.721374
	0.834025	0.882242
	0.814672	0.756877
	0.927273	0.668942
	0.798411	0.67337
	0.723857	0.757202
	0.720461	0.755037
	0.830026	0.83647
	0.762943	1.09429
	0.725118	0.679227
	0.82716	0.733585
	0.830351	0.726991
	0.999254	0.77965
	0.850863	0.732584
	0.748654	0.868179
	0.812955	0.67399
	0.83564	0.824203
	0.83956	0.876686
	0.827124	0.793597
	0.832133	0.776013
	1.06952	0.717888
	0.859937	0.707648
	0.854379	0.743148
	0.77974	0.875637
	0.852941	0.944411
	0.792549	0.884045
	0.798146	0.784053
	0.719371	0.847873
	0.788603	0.720841
	0.746575	0.658069
	0.847152	0.766843
	0.638009	0.749422
	0.710373	0.785018
	0.80335	0.765233
	0.826545	0.785008
	0.669179	0.826487
	0.733983	0.764524
	0.847763	0.812943
	0.876041	0.753529
	0.85802	0.731237
	0.790994	0.71961
	0.753558	0.71793
	0.773218	0.791697
	0.836547	0.742097
	0.802744	0.741071
	0.820423	0.749249
	0.754386	0.744433
	0.819213	0.838248
	0.759108	0.793005
	0.837374	0.776853
	0.791435	0.780899
	0.97619	0.78385
	0.866924	0.786426
	0.827934	0.772089
	1.05595	0.684564
	0.787234	0.77836
	0.746898	0.802589
	0.764168	0.719737
	0.745037	0.703625
	0.686192	0.627223
	0.674379	0.697178
	0.807989	0.746396
	0.75498	0.739198
	0.745358	0.799701
	0.869565	0.8
	0.677932	0.729323
	0.899727	0.769834
	0.765116	0.771475
	0.855733	0.838571
	0.700091	0.792513
	0.893232	0.811231
	0.833661	0.765974
	0.862458	0.860349
	0.876047	0.778993
	0.845029	0.918817
	0.805582	0.791545
	1.07729	0.740623
	0.790159	0.841356
	0.754747	0.907798
	0.860238	0.77014
	0.73357	0.733151
	0.805617	0.702213
	0.816327	0.821909
	0.814887	0.76898
	0.709309	0.782219
	0.749242	0.750605
	0.712775	0.719095
	0.837736	0.714873
	0.798144	0.8525
	0.873418	0.803745
	0.773836	0.735642
	0.955844	0.764458
	0.690984	0.72303
	0.732724	0.77231
	0.810345	0.794343
	0.829	0.808148
	0.777689	0.748643
	0.750947	0.779399
	0.655044	0.78584
	0.81413	0.753012
	0.830206	0.717372
	0.838681	0.84073
	1.00296	0.753001
	0.893681	0.988147
	0.971875	0.785189
	0.889881	0.766942
	0.866157	0.690018
	0.833077	0.787248
	0.878447	0.974397
	0.745156	0.735955
	0.85847	0.797019
	0.911027	0.899746
	0.930597	0.785992
	0.786543	0.798354
	0.738072	0.648734
	1.10442	0.721713
	0.748252	0.73964
	0.786856	0.711447
	0.881786	0.667838
	0.912668	0.744983
	1	0.65634
	0.778457	0.672614
	0.833983	0.806787
	0.812554	0.771334
	0.852941	0.709738
	0.724958	0.780014
	0.705176	0.715901
	0.863441	0.733391
	0.752066	0.782985
	0.694775	0.853194
	0.877318	0.744479
	0.731245	0.703579
	0.770295	0.768035
	0.731167	0.661839
	0.791219	0.833023
	0.781559	0.791146
	1.15935	0.806299
	0.776526	0.79823
	0.780505	0.721816
	0.860983	0.761381
	0.749677	0.712198
