# Supplementary material for: Conformation of the nuclear pore in living cells is modulated by transport state
Source: eLife. 2020 Dec 21;9:e60654. doi: 10.7554/eLife.60654 (PMC7752133; doi:10.7554/eLife.60654)
Supplement: Figure 4—source data 2. [file elife-60654-fig4-data2.xlsx]

## Sheet: Fig 4M Control Cells
Frame Number	Cell 1 N/C Intensity	Cell 2 N/C Intensity	Cell 3 N/C Intensity	Cell 4 N/C Intensity	Cell 5 N/C Intensity	Cell 6 N/C Intensity		Mean N:C Ratio	Standard Error N:C Ratio
1	0.8403	0.927052	0.764581	0.547082	0.6869	0.75759		0.753917	0.053178
2	0.841024	0.926493	0.762145	0.545687	0.682375	0.755648		0.752229	0.0535106
3	0.842344	0.925196	0.756909	0.542993	0.687544	0.754431		0.75157	0.0535495
4	0.843754	0.927771	0.756087	0.541666	0.685798	0.754198		0.751546	0.0541472
5	0.843699	0.929169	0.757746	0.539443	0.683842	0.758903		0.752134	0.0546821
6	0.850807	0.928788	0.752479	0.533109	0.680903	0.762101		0.751365	0.0560014
7	0.851086	0.921267	0.75555	0.537107	0.678615	0.763349		0.751162	0.0548242
8	0.84913	0.926365	0.756167	0.539314	0.674033	0.758262		0.750545	0.0551348
9	0.965125	1.01802	0.807215	0.587737	0.715019	0.810539		0.817276	0.0646656
10	1.06611	1.09946	0.851089	0.637716	0.756318	0.857771		0.878077	0.0725959
11	1.16894	1.17562	0.894801	0.682224	0.795065	0.910809		0.93791	0.0812925
12	1.2643	1.24786	0.938308	0.724621	0.826556	0.94259		0.990705	0.0901456
13	1.33411	1.31091	0.975759	0.761038	0.85967	0.982418		1.03732	0.0961994
14	1.40865	1.36868	1.01388	0.795893	0.891576	1.01429		1.08216	0.10267
15	1.47396	1.41538	1.04651	0.831603	0.923964	1.05338		1.12413	0.107064
16	1.52656	1.46386	1.08243	0.861938	0.952322	1.09015		1.16288	0.110982
17	1.58127	1.50854	1.11237	0.887738	0.981166	1.11639		1.19791	0.115556
18	1.62276	1.52955	1.15109	0.913552	1.00509	1.14595		1.228	0.116617
19	1.65895	1.55837	1.17205	0.929748	1.03032	1.1676		1.25284	0.11916
20	1.69954	1.57868	1.18758	0.955467	1.04971	1.18601		1.27616	0.121226
21	1.72215	1.60559	1.21611	0.976697	1.06255	1.20501		1.29802	0.122276
22	1.75174	1.62541	1.23434	0.993987	1.08022	1.22296		1.31811	0.123853
23	1.77814	1.65796	1.25265	1.01467	1.094	1.23966		1.33951	0.12611
24	1.80687	1.66763	1.26855	1.03644	1.10815	1.25769		1.35756	0.126655
25	1.82666	1.67345	1.28659	1.04921	1.12083	1.27566		1.37207	0.126682
26	1.84966	1.69611	1.30326	1.07408	1.13366	1.2884		1.39086	0.127586
27	1.86435	1.72113	1.31805	1.08853	1.144	1.3011		1.40619	0.128784
28	1.88302	1.74214	1.32835	1.09987	1.15568	1.31375		1.42047	0.13041
29	1.88679	1.75329	1.34439	1.11329	1.17149	1.32662		1.43265	0.128878
30	1.91058	1.76696	1.36037	1.12868	1.17831	1.33499		1.44665	0.130494
31	1.92928	1.76499	1.36756	1.12775	1.18959	1.35151		1.45511	0.131267
32	1.95525	1.77293	1.36951	1.13537	1.2006	1.363		1.46611	0.133322
33	1.95102	1.77959	1.3755	1.14755	1.21675	1.37305		1.47391	0.13084
34	1.97656	1.79365	1.38229	1.14917	1.22893	1.38465		1.48587	0.13365
35	1.9883	1.79939	1.38567	1.15179	1.23628	1.3989		1.49339	0.134401
36	2.00066	1.80441	1.38948	1.15945	1.24419	1.40102		1.49987	0.135
37	2.00964	1.80405	1.40166	1.17089	1.24986	1.41215		1.50804	0.134173
38	2.01216	1.81355	1.40674	1.1745	1.25094	1.42428		1.51369	0.134401
39	2.03123	1.81698	1.40986	1.18538	1.26162	1.42872		1.5223	0.135242
40	2.03043	1.82797	1.40795	1.20158	1.26736	1.42664		1.52699	0.13436
41	2.03845	1.83068	1.40614	1.20892	1.27641	1.4421		1.53378	0.134078
42	2.0502	1.83212	1.41897	1.21989	1.29032	1.45004		1.54359	0.133306
43	2.06144	1.82891	1.42582	1.22888	1.29279	1.46559		1.55057	0.133064
44	2.0619	1.84186	1.4243	1.23423	1.29677	1.46703		1.55435	0.133371
45	2.07232	1.83938	1.43164	1.23898	1.30547	1.46384		1.55861	0.133426
46	2.08657	1.83121	1.44473	1.24979	1.31114	1.45762		1.56351	0.133253
47	2.09843	1.84103	1.44087	1.24563	1.30919	1.45764		1.56547	0.136029
48	2.11047	1.825	1.44394	1.23765	1.30924	1.45304		1.56322	0.13722
49	2.03043	1.76008	1.41286	1.18712	1.27407	1.41921		1.51396	0.130497
50	1.91049	1.67382	1.36595	1.13093	1.22467	1.36983		1.44595	0.11946
51	1.79721	1.59372	1.3212	1.07036	1.17211	1.31961		1.37904	0.110443
52	1.68815	1.53065	1.27355	1.0165	1.12221	1.27156		1.3171	0.102567
53	1.59134	1.46374	1.23314	0.96506	1.07886	1.22105		1.25886	0.0954515
54	1.50172	1.40945	1.19306	0.92395	1.04663	1.18366		1.20975	0.0883887
55	1.43965	1.35352	1.16972	0.883893	1.01945	1.15223		1.16974	0.0839101
56	1.37774	1.31225	1.1388	0.848454	0.992629	1.1178		1.13128	0.0801968
57	1.32343	1.27647	1.11099	0.821866	0.96864	1.09192		1.09889	0.0765629
58	1.27353	1.24774	1.07982	0.799058	0.943646	1.07374		1.06959	0.0735976
59	1.2396	1.21896	1.0592	0.781012	0.922567	1.04826		1.04493	0.0714196
60	1.21124	1.20111	1.03364	0.763356	0.904903	1.03231		1.02442	0.0704049
61	1.18142	1.17307	1.02154	0.746982	0.884272	1.00303		1.00172	0.0684919
62	1.16417	1.15757	1.00875	0.736242	0.867971	0.990781		0.987582	0.067828
63	1.13778	1.14384	0.992563	0.720094	0.857836	0.97397		0.971013	0.0668138
64	1.12329	1.13395	0.981111	0.711835	0.849835	0.956605		0.959437	0.0661055
65	1.10811	1.11646	0.968632	0.699706	0.839492	0.950307		0.947118	0.0652851
66	1.09723	1.09732	0.960756	0.694561	0.830347	0.945285		0.937583	0.0638121
67	1.08282	1.09422	0.949401	0.688201	0.818486	0.936604		0.92829	0.0636735
68	1.07462	1.08256	0.943054	0.684325	0.812569	0.932744		0.921645	0.0627415
69	1.07314	1.07747	0.930979	0.676389	0.803737	0.922565		0.914046	0.0635151
70	1.06469	1.06505	0.922383	0.670516	0.795705	0.916105		0.905741	0.0628402
71	1.06241	1.07301	0.914568	0.665614	0.792522	0.911427		0.903258	0.0640511
72	1.04673	1.07389	0.914788	0.658649	0.787458	0.903062		0.897431	0.0639986
73	1.04191	1.07139	0.904966	0.654191	0.78133	0.900796		0.892431	0.0642128
74	1.04519	1.07289	0.898668	0.648816	0.773042	0.89719		0.889298	0.065702
75	1.04778	1.0716	0.895998	0.642708	0.766897	0.888334		0.885553	0.0668583
76	1.04711	1.06837	0.888865	0.640158	0.765097	0.892141		0.883623	0.0669035
77	1.03627	1.06024	0.885958	0.635973	0.764918	0.886464		0.878303	0.0657667
78	1.03122	1.05587	0.877972	0.627499	0.763681	0.886941		0.873864	0.066058
79	1.03059	1.04491	0.872682	0.625321	0.763765	0.886374		0.870606	0.0652708
80	1.02529	1.04446	0.867116	0.62842	0.761317	0.88544		0.868673	0.0645392
81	1.02268	1.04467	0.865185	0.627944	0.760356	0.879667		0.86675	0.0644168
82	1.01776	1.03519	0.858892	0.629151	0.757057	0.874871		0.862153	0.0631562
83	1.01429	1.02926	0.854568	0.631326	0.76046	0.870694		0.860101	0.0618601
84	1.01439	1.02856	0.856168	0.629331	0.755792	0.872887		0.859521	0.0623152
85	1.00973	1.03177	0.856326	0.625853	0.751992	0.884724		0.860066	0.0629922
86	1.00775	1.02897	0.86027	0.62762	0.751223	0.876051		0.858648	0.0623059
87	1.00832	1.03238	0.865072	0.625694	0.752516	0.880352		0.860722	0.062876
88	0.999981	1.02524	0.855527	0.628242	0.749472	0.881151		0.856602	0.0614339
89	0.994911	1.03316	0.853471	0.624696	0.751061	0.883069		0.856728	0.0621646
90	0.995465	1.02544	0.851952	0.617869	0.754831	0.884255		0.854969	0.0621588
91	0.993024	1.02445	0.853164	0.619453	0.758093	0.885855		0.855673	0.0615329
92	0.986489	1.02834	0.853387	0.622863	0.754461	0.880992		0.854422	0.0611031
93	0.981751	1.02185	0.845486	0.628591	0.758877	0.882052		0.8531	0.0592184

## Sheet: Fig 4N Q69L Cells
Frame Number	Cell 1 N/C Intensity	Cell 2 N/C Intensity	Cell 3 N/C Intensity	Cell 4 N/C Intensity	Cell 5 N/C Intensity	Cell 6 N/C Intensity		Mean N:C Ratio	Standard Error N:C Ratio
1	1.07945	0.971323	1.10244	0.91531	0.946874	1.02166		1.00618	0.0304766
2	1.08135	0.967893	1.08619	0.969082	0.951284	1.02811		1.01398	0.0245107
3	1.10073	0.972047	1.08095	0.946789	0.939507	1.02739		1.01124	0.0282636
4	1.10628	0.971126	1.06888	0.933039	0.936613	1.01817		1.00568	0.029161
5	1.1117	0.97681	1.09765	0.930411	0.926108	1.02665		1.01155	0.0330462
6	1.10409	0.973566	1.1058	0.91613	0.928252	1.02703		1.00914	0.0342236
7	1.10931	0.975097	1.09718	0.932129	0.920238	1.03977		1.01229	0.0334951
8	1.08733	0.972604	1.10662	0.945982	0.923757	1.02785		1.01069	0.0308575
9	1.06218	0.98556	1.1166	0.967364	0.927166	1.03521		1.01568	0.0281685
10	1.03916	0.992988	1.14081	0.966113	0.935031	1.04476		1.01981	0.0296813
11	1.01982	0.992624	1.17474	0.972816	0.949844	1.044		1.02564	0.0327749
12	1.00096	0.998675	1.15791	0.979488	0.9717	1.03488		1.02393	0.0282489
13	0.998634	1.00338	1.16194	0.986999	0.997988	1.03536		1.03072	0.0270802
14	0.987789	1.00788	1.17889	1.02432	1.00374	1.04329		1.04098	0.0286442
15	0.974813	1.02028	1.18559	1.06167	1.02383	1.05107		1.05288	0.0292655
16	0.977466	1.03055	1.19099	1.07972	1.03365	1.05102		1.06057	0.0294386
17	0.959043	1.03431	1.20483	1.09413	1.04574	1.04842		1.06441	0.0332729
18	0.948006	1.03332	1.17584	1.11393	1.05653	1.03867		1.06105	0.0316453
19	0.943633	1.03187	1.18286	1.12932	1.07042	1.04384		1.06699	0.0338175
20	0.925792	1.03867	1.18439	1.1395	1.07081	1.0481		1.06788	0.0365819
21	0.920912	1.0407	1.18444	1.15165	1.08911	1.05622		1.07384	0.0379977
22	0.909899	1.04619	1.2191	1.17512	1.09568	1.05494		1.08349	0.0444497
23	0.89707	1.04275	1.26333	1.19519	1.09724	1.05686		1.09207	0.0521815
24	0.894185	1.0469	1.2431	1.21293	1.08769	1.05062		1.08924	0.0517379
25	0.885972	1.04367	1.24756	1.21774	1.09834	1.05201		1.09088	0.053674
26	0.880606	1.04306	1.25028	1.22635	1.09382	1.05821		1.09205	0.0551748
27	0.874551	1.0443	1.24416	1.23126	1.10645	1.07179		1.09542	0.0555732
28	0.873098	1.05287	1.26176	1.25431	1.10516	1.07404		1.10354	0.0589653
29	0.867534	1.06073	1.28282	1.26811	1.10272	1.08161		1.11059	0.0624338
30	0.859012	1.06501	1.29826	1.27819	1.09132	1.07493		1.11112	0.0659097
31	0.868834	1.0652	1.30283	1.29211	1.11704	1.07786		1.12065	0.0660598
32	0.875855	1.07426	1.30575	1.29262	1.15575	1.07922		1.13058	0.0653883
33	0.867713	1.07211	1.31787	1.30369	1.18798	1.06854		1.13632	0.0694044
34	0.860557	1.07317	1.31601	1.33463	1.20032	1.05374		1.13974	0.0735971
35	0.849959	1.07234	1.31131	1.36213	1.20178	1.0529		1.14174	0.0771964
36	0.846857	1.05932	1.32624	1.36947	1.21553	1.04584		1.14388	0.0804703
37	0.835838	1.05726	1.33736	1.37226	1.22564	1.04811		1.14608	0.0832296
38	0.831928	1.05739	1.32074	1.374	1.22225	1.04601		1.14205	0.0826098
39	0.837307	1.0601	1.32368	1.37237	1.2232	1.03977		1.14274	0.0821916
40	0.840511	1.06302	1.36292	1.37373	1.22681	1.03284		1.14997	0.0853162
41	0.835593	1.06925	1.38189	1.37607	1.23501	1.04065		1.15641	0.0874047
42	0.84099	1.07277	1.37887	1.38653	1.24044	1.05247		1.16201	0.0869111
43	0.841184	1.07557	1.3933	1.38989	1.23702	1.05606		1.1655	0.0880541
44	0.852558	1.07803	1.41659	1.39887	1.23937	1.07		1.1759	0.0888856
45	0.857724	1.07612	1.42045	1.40308	1.24607	1.07222		1.17928	0.0891092
46	0.865364	1.07574	1.42921	1.40949	1.24007	1.0847		1.1841	0.0889247
47	0.867173	1.07531	1.40176	1.40243	1.25132	1.08115		1.17986	0.0860874
48	0.920199	1.07747	1.39621	1.40587	1.23985	1.0872		1.1878	0.0790782
49	0.920936	1.07719	1.40032	1.37414	1.21047	1.08009		1.17719	0.0763283
50	0.921659	1.0759	1.36653	1.34637	1.18326	1.08891		1.16377	0.0699473
51	0.918278	1.07013	1.33462	1.32032	1.16808	1.08251		1.14899	0.065331
52	0.927385	1.06031	1.30478	1.28949	1.15247	1.09903		1.13891	0.0585611
53	0.926143	1.04412	1.30695	1.25541	1.12887	1.09147		1.12549	0.0569612
54	0.925362	1.03194	1.29285	1.23088	1.119	1.08129		1.11355	0.0544857
55	0.937265	1.01675	1.29084	1.20625	1.09684	1.0729		1.10348	0.052216
56	0.924578	1.0062	1.32015	1.17729	1.0912	1.07424		1.09894	0.056198
57	0.925034	1.00101	1.33744	1.14236	1.0705	1.06723		1.0906	0.0577345
58	0.928734	0.992411	1.33861	1.1041	1.0732	1.05534		1.08207	0.0573415
59	0.918753	0.99435	1.35335	1.08215	1.06202	1.05313		1.07729	0.0602941
60	0.92306	0.993891	1.32891	1.06479	1.06338	1.05591		1.07166	0.0561762
61	0.928208	0.996452	1.28771	1.05707	1.05657	1.03814		1.06069	0.0495833
62	0.938903	0.993715	1.29744	1.0562	1.05147	1.03768		1.06257	0.0503258
63	0.943407	0.991969	1.26489	1.05559	1.04427	1.04186		1.057	0.0449983
64	0.939359	0.991556	1.24431	1.0719	1.03646	1.04142		1.05417	0.0424451
65	0.935551	0.999445	1.24074	1.04933	1.03577	1.0351		1.04932	0.0418161
66	0.942935	1.00537	1.2381	1.02852	1.03917	1.03441		1.04808	0.0406755
67	0.952761	1.01364	1.26706	1.01906	1.03357	1.04746		1.05559	0.0443243
68	0.940822	1.02039	1.27371	1.01163	1.03194	1.04137		1.05331	0.0464227
69	0.938601	1.02645	1.2552	1.00501	1.02411	1.04534		1.04912	0.0438877
70	0.935886	1.03357	1.22291	0.997193	1.01738	1.04494		1.04198	0.0394476
71	0.942712	1.03748	1.21225	0.981837	1.00194	1.03449		1.03512	0.038236
72	0.943466	1.04136	1.20677	0.968368	0.998616	1.03714		1.03262	0.0381476
73	0.960635	1.05074	1.19757	0.954943	1.01062	1.03443		1.03482	0.0361529
74	0.962774	1.03875	1.21344	0.939917	1.01112	1.04202		1.03467	0.0394676
75	0.955068	1.03216	1.22069	0.931967	1.0111	1.04269		1.03228	0.0416656
76	0.949455	1.03054	1.23153	0.925429	1.02479	1.02747		1.03154	0.0439907
77	0.935438	1.03082	1.22387	0.926887	1.02265	1.01971		1.02656	0.0436837
78	0.928797	1.03	1.22971	0.918992	1.02508	1.00928		1.02364	0.0457014
79	0.934124	1.02502	1.22417	0.914381	1.0255	1.02542		1.02477	0.0447824
80	0.946538	1.01747	1.24136	0.915954	1.01618	1.01581		1.02555	0.0465746
81	0.946475	1.01445	1.24676	0.918076	1.01612	1.01133		1.02554	0.0473119
82	0.956897	1.01985	1.20734	0.919596	1.00362	1.01043		1.01962	0.0406272
83	0.960006	1.02573	1.17982	0.914029	0.984363	1.01712		1.01351	0.0371614
84	0.951848	1.02749	1.16475	0.925719	0.96698	1.00625		1.00717	0.034907
85	0.945393	1.02151	1.16237	0.93964	0.952574	1.00596		1.00457	0.0344529
86	0.94517	1.02633	1.16667	0.96056	0.94539	1.00743		1.00859	0.0344622
87	0.954691	1.02689	1.19645	0.959489	0.934397	1.01051		1.01374	0.0392825
88	0.959902	1.0357	1.19386	0.965699	0.933018	1.00731		1.01592	0.0385843
89	0.96063	1.04798	1.21239	0.955964	0.940522	1.0113		1.02146	0.0415539
90	0.976489	1.04055	1.20531	0.974693	0.93626	1.00353		1.0228	0.0391334
91	0.980879	1.03614	1.20303	0.965621	0.933753	1.01648		1.02265	0.0390115
92	0.991053	1.03649	1.2066	0.96186	0.936039	1.01954		1.02526	0.0392403
93	0.995161	1.02898	1.20061	0.951296	0.934763	1.01788		1.02145	0.038857

## Sheet: Control Cell1
Frame Number	Nuclear ROI Volume (pixels)	Nuclear Mean Intensity	Nuclear Min Intensity	Nuclear Max Intensity		Frame Number	Cytosol ROI Volume (pixels)	Cytosol Mean Intensity	Cytosol Min Intensity	Cytosol Max Intensity			N/C
1	17950	7031.03	4862	8453		1	7298	5908.18	5101	7000			0.8403
2	17950	7117.69	4880	8541		2	7298	5986.15	5161	7045			0.841024
3	17950	7102.1	4832	8581		3	7298	5982.41	5175	7126			0.842344
4	17950	7195.15	4833	8685		4	7298	6070.94	5194	7151			0.843754
5	17950	7242.45	4873	8706		5	7298	6110.44	5324	7178			0.843699
6	17950	7204.99	4910	8597		6	7298	6130.05	5313	7209			0.850807
7	17950	7286.12	4829	8774		7	7298	6201.12	5329	7312			0.851086
8	17950	7362.42	4907	8810		8	7298	6251.65	5333	7487			0.84913
9	17950	7175.52	4734	8705		9	7298	6925.28	5973	7966			0.965125
10	17950	7108.13	4699	8556		10	7298	7578.05	6697	8563			1.06611
11	17950	6994.25	4679	8573		11	7298	8175.84	7232	9251			1.16894
12	17950	6796.31	4482	8336		12	7298	8592.58	7682	9699			1.2643
13	17950	6809.06	4547	8408		13	7298	9084	8127	10084			1.33411
14	17950	6670.52	4303	8336		14	7298	9396.46	8429	10521			1.40865
15	17950	6603.44	4111	8165		15	7298	9733.2	8708	10759			1.47396
16	17950	6563.78	4282	8163		16	7298	10020	8984	11012			1.52656
17	17950	6447.38	4217	8165		17	7298	10195	9027	11242			1.58127
18	17950	6426.26	4213	8049		18	7298	10428.3	9245	11427			1.62276
19	17950	6358.37	4042	8043		19	7298	10548.2	9434	11541			1.65895
20	17950	6334.8	4079	8080		20	7298	10766.2	9484	11827			1.69954
21	17950	6332.49	4122	8045		21	7298	10905.5	9787	11975			1.72215
22	17950	6275.53	4135	8059		22	7298	10993.1	9687	11984			1.75174
23	17950	6231.33	4134	7978		23	7298	11080.1	9802	12192			1.77814
24	17950	6186.16	4131	7970		24	7298	11177.6	9979	12253			1.80687
25	17950	6183.21	4062	8049		25	7298	11294.7	9953	12414			1.82666
26	17950	6159.92	4035	8052		26	7298	11393.7	10037	12508			1.84966
27	17950	6158.85	3985	8006		27	7298	11482.2	10050	12719			1.86435
28	17950	6128.32	3873	7959		28	7298	11539.8	10221	12767			1.88302
29	17950	6171.36	3987	8002		29	7298	11644.1	10122	12869			1.88679
30	17950	6113.11	3941	7891		30	7298	11679.6	10252	12811			1.91058
31	17950	6115.98	3939	8049		31	7298	11799.4	10437	12938			1.92928
32	17950	6104.58	3950	7973		32	7298	11936	10404	13269			1.95525
33	17950	6169.03	3925	8157		33	7298	12035.9	10449	13328			1.95102
34	17950	6083.55	3894	8057		34	7298	12024.5	10517	13424			1.97656
35	17950	6082.95	4016	8071		35	7298	12094.8	10527	13422			1.9883
36	17950	6076.57	3944	8082		36	7298	12157.1	10529	13546			2.00066
37	17950	6084.43	3913	8019		37	7298	12227.5	10579	13597			2.00964
38	17950	6076.97	4050	8084		38	7298	12227.8	10759	13666			2.01216
39	17950	6058.41	3948	8086		39	7298	12306	10766	13784			2.03123
40	17950	6038.08	3909	8016		40	7298	12259.9	10678	13726			2.03043
41	17950	6056.19	3990	8090		41	7298	12345.2	10677	13700			2.03845
42	17950	6064.85	3989	8244		42	7298	12434.2	10829	13764			2.0502
43	17950	6026	4010	8200		43	7298	12422.3	10811	13806			2.06144
44	17950	6064.7	4008	8171		44	7298	12504.8	10913	13811			2.0619
45	17950	6057.43	3979	8099		45	7298	12552.9	10894	13880			2.07232
46	17950	6027.37	3907	8142		46	7298	12576.5	10885	14091			2.08657
47	17950	6022.26	3882	8192		47	7298	12637.3	10932	14070			2.09843
48	17950	6049.92	3852	8432		48	7298	12768.2	11214	14283			2.11047
49	17950	6108.79	3854	8251		49	7298	12403.5	10940	13878			2.03043
50	17950	6295.49	4038	8401		50	7298	12027.5	10276	13460			1.91049
51	17950	6412.63	4206	8462		51	7298	11524.9	10147	12846			1.79721
52	17950	6542.89	4233	8450		52	7298	11045.4	9521	12263			1.68815
53	17950	6672.92	4370	8586		53	7298	10618.9	9260	11856			1.59134
54	17950	6833.92	4575	8922		54	7298	10262.6	8920	11574			1.50172
55	17950	6889.42	4698	8957		55	7298	9918.36	8478	11192			1.43965
56	17950	6959.04	4548	8980		56	7298	9587.74	8212	10846			1.37774
57	17950	7134.99	4600	9045		57	7298	9442.66	7954	10711			1.32343
58	17950	7284.18	4912	9113		58	7298	9276.59	7921	10565			1.27353
59	17950	7307.04	5003	9136		59	7298	9057.8	7923	10345			1.2396
60	17950	7380.03	4960	9254		60	7298	8938.98	7356	10462			1.21124
61	17950	7455.61	5151	9365		61	7298	8808.21	7610	10117			1.18142
62	17950	7554.83	4976	9391		62	7298	8795.13	7469	10231			1.16417
63	17950	7604.5	5097	9454		63	7298	8652.21	7055	10180			1.13778
64	17950	7636.38	5050	9598		64	7298	8577.87	7261	10018			1.12329
65	17950	7692.15	5143	9625		65	7298	8523.75	7276	10042			1.10811
66	17950	7768.38	5258	9787		66	7298	8523.72	7198	10086			1.09723
67	17950	7792.31	5094	9656		67	7298	8437.69	7171	10062			1.08282
68	17950	7853.78	5179	9720		68	7298	8439.81	7089	10075			1.07462
69	17950	7865.46	5363	9869		69	7298	8440.71	7009	9883			1.07314
70	17950	7911.24	5325	9813		70	7298	8422.98	7163	9902			1.06469
71	17950	7927.5	5317	9966		71	7298	8422.23	7022	10158			1.06241
72	17950	8036.79	5436	10238		72	7298	8412.38	7030	10192			1.04673
73	17950	8082.96	5475	10115		73	7298	8421.71	7040	9974			1.04191
74	17950	8073.18	5363	10175		74	7298	8437.97	7027	10107			1.04519
75	17950	8063.97	5306	10034		75	7298	8449.28	7121	10291			1.04778
76	17950	8092.92	5376	10163		76	7298	8474.2	7060	10355			1.04711
77	17950	8225.59	5437	10298		77	7298	8523.89	7006	10397			1.03627
78	17950	8241.91	5395	10356		78	7298	8499.21	7130	10227			1.03122
79	17950	8276.06	5500	10552		79	7298	8529.21	7183	10328			1.03059
80	17950	8305.4	5638	10412		80	7298	8515.45	7107	10265			1.02529
81	17950	8347.58	5622	10508		81	7298	8536.9	7108	10419			1.02268
82	17950	8474.96	5612	10701		82	7298	8625.46	7214	10487			1.01776
83	17950	8455.43	5791	10917		83	7298	8576.28	7078	10199			1.01429
84	17950	8447.17	5729	10475		84	7298	8568.72	7196	10560			1.01439
85	17950	8571.79	5702	10795		85	7298	8655.2	7194	10488			1.00973
86	17950	8605.47	5762	10781		86	7298	8672.18	7278	10364			1.00775
87	17950	8606.92	5639	10927		87	7298	8678.51	7121	10344			1.00832
88	17950	8710.4	5621	11028		88	7298	8710.24	7308	10667			0.999981
89	17950	8727.49	5714	10991		89	7298	8683.08	7227	10359			0.994911
90	17950	8764.64	5861	11203		90	7298	8724.89	7293	10475			0.995465
91	17950	8716.97	5902	11070		91	7298	8656.17	7051	10339			0.993024
92	17950	8758.1	5830	11040		92	7298	8639.77	7024	10419			0.986489
93	17950	8785.48	5978	11084		93	7298	8625.16	6810	10190			0.981751

## Sheet: Control Cell2
Frame Number	Nuclear ROI Volume (pixels)	Nuclear Mean Intensity	Nuclear Min Intensity	Nuclear Max Intensity			Frame Number	Cytosol ROI Volume (pixels)	Cytosol Mean Intensity	Cytosol Min Intensity	Cytosol Max Intensity		N/C
1	10051	3796.31	3039	4402			1	6240	3519.38	3031	4038			0.927052
2	10051	3827.37	3082	4491			2	6240	3546.03	3077	4152			0.926493
3	10051	3848.89	3047	4444			3	6240	3560.98	3043	4154			0.925196
4	10051	3860.7	2934	4416			4	6240	3581.84	3037	4125			0.927771
5	10051	3859.66	3119	4429			5	6240	3586.27	3103	4092			0.929169
6	10051	3895.47	3180	4443			6	6240	3618.07	3102	4253			0.928788
7	10051	3951.24	3081	4548			7	6240	3640.15	3110	4170			0.921267
8	10051	3937.06	3206	4622			8	6240	3647.15	3056	4195			0.926365
9	10051	3879.68	3076	4505			9	6240	3949.59	3465	4570			1.01802
10	10051	3842.72	3063	4450			10	6240	4224.9	3716	4777			1.09946
11	10051	3762.41	2992	4453			11	6240	4423.18	3788	5003			1.17562
12	10051	3724.93	2986	4392			12	6240	4648.18	4065	5220			1.24786
13	10051	3670.84	2947	4323			13	6240	4812.15	4156	5354			1.31091
14	10051	3609.93	2889	4291			14	6240	4940.84	4389	5564			1.36868
15	10051	3575.72	2791	4278			15	6240	5061.03	4462	5639			1.41538
16	10051	3556.07	2806	4302			16	6240	5205.58	4592	5946			1.46386
17	10051	3525.32	2742	4294			17	6240	5318.06	4647	5894			1.50854
18	10051	3551.61	2769	4363			18	6240	5432.36	4807	6058			1.52955
19	10051	3546.36	2641	4342			19	6240	5526.56	4824	6132			1.55837
20	10051	3556.6	2776	4308			20	6240	5614.75	4886	6245			1.57868
21	10051	3529.18	2738	4313			21	6240	5666.41	5027	6384			1.60559
22	10051	3513.06	2730	4298			22	6240	5710.18	4979	6361			1.62541
23	10051	3477.64	2646	4196			23	6240	5765.78	5111	6344			1.65796
24	10051	3473.43	2654	4354			24	6240	5792.41	5153	6423			1.66763
25	10051	3469.95	2603	4272			25	6240	5806.8	5115	6434			1.67345
26	10051	3434.11	2676	4244			26	6240	5824.63	5205	6502			1.69611
27	10051	3404.44	2544	4239			27	6240	5859.48	5147	6583			1.72113
28	10051	3381.18	2600	4253			28	6240	5890.49	5125	6517			1.74214
29	10051	3385.95	2609	4321			29	6240	5936.55	5230	6661			1.75329
30	10051	3357.5	2561	4217			30	6240	5932.59	5214	6565			1.76696
31	10051	3355.97	2607	4211			31	6240	5923.26	5325	6643			1.76499
32	10051	3364.39	2531	4234			32	6240	5964.83	5319	6550			1.77293
33	10051	3352.98	2490	4207			33	6240	5966.94	5298	6674			1.77959
34	10051	3322.31	2462	4242			34	6240	5959.05	5163	6642			1.79365
35	10051	3329	2485	4256			35	6240	5990.16	5229	6637			1.79939
36	10051	3306.17	2472	4203			36	6240	5965.68	5264	6665			1.80441
37	10051	3328.97	2419	4256			37	6240	6005.63	5353	6652			1.80405
38	10051	3318.81	2493	4256			38	6240	6018.84	5301	6752			1.81355
39	10051	3333.83	2496	4270			39	6240	6057.5	5318	6641			1.81698
40	10051	3307.12	2472	4159			40	6240	6045.3	5358	6798			1.82797
41	10051	3280.88	2493	4115			41	6240	6006.25	5282	6615			1.83068
42	10051	3264	2480	4122			42	6240	5980.06	5380	6640			1.83212
43	10051	3277.12	2505	4142			43	6240	5993.54	5322	6666			1.82891
44	10051	3232.08	2438	4149			44	6240	5953.05	5282	6575			1.84186
45	10051	3248.61	2507	4159			45	6240	5975.43	5303	6641			1.83938
46	10051	3252.08	2362	4070			46	6240	5955.23	5295	6627			1.83121
47	10051	3231.79	2483	4188			47	6240	5949.83	5292	6613			1.84103
48	10051	3258.07	2444	4105			48	6240	5945.97	5340	6638			1.825
49	10051	3278.62	2484	4296			49	6240	5770.63	5056	6410			1.76008
50	10051	3336.1	2520	4210			50	6240	5584.04	4874	6209			1.67382
51	10051	3384.16	2580	4151			51	6240	5393.39	4700	6003			1.59372
52	10051	3407.47	2536	4177			52	6240	5215.64	4540	5788			1.53065
53	10051	3438.83	2604	4302			53	6240	5033.54	4398	5786			1.46374
54	10051	3477.76	2724	4211			54	6240	4901.73	4313	5528			1.40945
55	10051	3533.37	2761	4372			55	6240	4782.47	4139	5344			1.35352
56	10051	3568.24	2815	4326			56	6240	4682.43	4021	5341			1.31225
57	10051	3592.43	2791	4288			57	6240	4585.63	3918	5249			1.27647
58	10051	3614.71	2881	4394			58	6240	4510.22	3940	5232			1.24774
59	10051	3639.45	2931	4342			59	6240	4436.36	3787	5040			1.21896
60	10051	3633.67	2856	4380			60	6240	4364.43	3725	5012			1.20111
61	10051	3691.96	2956	4446			61	6240	4330.95	3725	4979			1.17307
62	10051	3688.9	2926	4374			62	6240	4270.18	3641	4964			1.15757
63	10051	3676.46	2979	4288			63	6240	4205.29	3590	4909			1.14384
64	10051	3688.57	2991	4351			64	6240	4182.64	3598	4837			1.13395
65	10051	3740.2	2964	4439			65	6240	4175.78	3556	4841			1.11646
66	10051	3779.96	3051	4423			66	6240	4147.82	3532	4840			1.09732
67	10051	3763.46	3038	4487			67	6240	4118.07	3494	4884			1.09422
68	10051	3809.49	3025	4483			68	6240	4124.02	3489	4834			1.08256
69	10051	3795.74	3005	4415			69	6240	4089.79	3479	4687			1.07747
70	10051	3826.1	3019	4522			70	6240	4075	3471	4778			1.06505
71	10051	3780.77	2929	4449			71	6240	4056.8	3410	4704			1.07301
72	10051	3766.04	3026	4522			72	6240	4044.33	3456	4668			1.07389
73	10051	3754.74	2926	4480			73	6240	4022.8	3423	4649			1.07139
74	10051	3748.06	2953	4547			74	6240	4021.24	3252	4663			1.07289
75	10051	3734.07	2953	4466			75	6240	4001.43	3353	4599			1.0716
76	10051	3730.57	2873	4532			76	6240	3985.61	3385	4666			1.06837
77	10051	3735.09	2985	4464			77	6240	3960.09	3344	4624			1.06024
78	10051	3743	2953	4467			78	6240	3952.12	3281	4503			1.05587
79	10051	3754.84	2947	4488			79	6240	3923.46	3344	4613			1.04491
80	10051	3737.27	2905	4536			80	6240	3903.41	3278	4492			1.04446
81	10051	3740.88	2968	4421			81	6240	3907.98	3132	4551			1.04467
82	10051	3793.76	2936	4513			82	6240	3927.24	3312	4562			1.03519
83	10051	3800.46	3030	4567			83	6240	3911.68	3240	4501			1.02926
84	10051	3798.21	3061	4466			84	6240	3906.69	3307	4501			1.02856
85	10051	3781.11	3046	4582			85	6240	3901.24	3276	4531			1.03177
86	10051	3781.84	3034	4619			86	6240	3891.4	3313	4538			1.02897
87	10051	3778.45	2943	4490			87	6240	3900.8	3202	4533			1.03238
88	10051	3790.07	3054	4518			88	6240	3885.72	3176	4505			1.02524
89	10051	3742.69	2993	4438			89	6240	3866.81	3251	4490			1.03316
90	10051	3764.47	3041	4507			90	6240	3860.26	3226	4424			1.02544
91	10051	3751.51	2898	4575			91	6240	3843.22	3217	4544			1.02445
92	10051	3730.24	2953	4446			92	6240	3835.95	3153	4433			1.02834
93	10051	3744.39	2804	4483			93	6240	3826.19	3239	4489			1.02185

## Sheet: Control Cell3 
Frame Number	Nuclear ROI Volume (pixels)	Nuclear Mean Intensity	Nuclear Min Intensity	Nuclear Max Intensity			Frame Number	Cytosol ROI Volume (pixels)	Cytosol Mean Intensity	Cytosol Min Intensity	Cytosol Max Intensity		N/C
1	3775	17560.9	15753	19653			1	4022	22968	17486	27256		0.764581
2	3775	17528.4	15488	19819			2	4022	22998.8	17596	27180		0.762145
3	3775	17528.9	15680	19933			3	4022	23158.6	17628	27464		0.756909
4	3775	17576.4	15788	19449			4	4022	23246.5	17975	27885		0.756087
5	3775	17616	15921	19336			5	4022	23247.9	18048	27736		0.757746
6	3775	17689.8	15882	19700			6	4022	23508.7	18303	27857		0.752479
7	3775	17725.7	15902	19807			7	4022	23460.7	18232	27950		0.75555
8	3775	17733.1	15733	19947			8	4022	23451.3	18194	27994		0.756167
9	3775	18873.3	16774	21195			9	4022	23380.7	18041	27719		0.807215
10	3775	19778.3	17710	22250			10	4022	23238.8	17674	27541		0.851089
11	3775	20616.3	18567	22754			11	4022	23040.1	17986	27420		0.894801
12	3775	21359.5	19198	23384			12	4022	22763.9	17571	27038		0.938308
13	3775	22081.6	19712	24296			13	4022	22630.2	17536	26747		0.975759
14	3775	22684.8	20269	25260			14	4022	22374.3	17323	26920		1.01388
15	3775	23377.8	20950	25767			15	4022	22338.9	16991	27292		1.04651
16	3775	23789.9	21185	26662			16	4022	21978.2	16742	26994		1.08243
17	3775	24352.6	21827	26793			17	4022	21892.6	16835	26724		1.11237
18	3775	24721.7	21852	27563			18	4022	21476.8	16161	25687		1.15109
19	3775	25026.5	22308	27744			19	4022	21352.7	16326	25454		1.17205
20	3775	25422	22685	28196			20	4022	21406.6	16686	25135		1.18758
21	3775	25762.8	23253	28871			21	4022	21184.6	16280	25343		1.21611
22	3775	26128.1	23512	28652			22	4022	21167.6	16378	25220		1.23434
23	3775	26159.8	23385	28949			23	4022	20883.5	16212	25038		1.25265
24	3775	26630.9	23638	29922			24	4022	20993.1	16252	25290		1.26855
25	3775	26764.3	24107	29560			25	4022	20802.5	15964	24914		1.28659
26	3775	27087.6	24477	30039			26	4022	20784.5	16014	24965		1.30326
27	3775	27302.4	24753	29978			27	4022	20714.2	16157	24725		1.31805
28	3775	27585.7	24989	30749			28	4022	20767	16209	25176		1.32835
29	3775	27786.7	24876	31006			29	4022	20668.6	16147	24951		1.34439
30	3775	27877.3	25104	30577			30	4022	20492.4	15855	24630		1.36037
31	3775	28119.8	25258	31386			31	4022	20562.1	15922	24991		1.36756
32	3775	28259.1	25735	30850			32	4022	20634.5	16185	25001		1.36951
33	3775	28331.5	25745	31335			33	4022	20597.2	16106	25221		1.3755
34	3775	28539.8	25748	31181			34	4022	20646.8	16007	25056		1.38229
35	3775	28663	25880	31622			35	4022	20685.3	16190	24914		1.38567
36	3775	28746.6	26035	31362			36	4022	20688.7	16157	24961		1.38948
37	3775	28929.8	26236	31627			37	4022	20639.7	16252	24709		1.40166
38	3775	29048.9	26263	31799			38	4022	20649.8	15831	24875		1.40674
39	3775	29297.3	26219	32109			39	4022	20780.3	16554	24940		1.40986
40	3775	29216.8	26521	31621			40	4022	20751.2	16456	24568		1.40795
41	3775	29149.2	26546	31500			41	4022	20729.9	16289	24744		1.40614
42	3775	29210.8	26729	31833			42	4022	20585.8	16236	24614		1.41897
43	3775	29302.6	26665	32095			43	4022	20551.4	16237	24506		1.42582
44	3775	29451.9	26924	31820			44	4022	20678.1	16381	24448		1.4243
45	3775	29468.9	27036	31727			45	4022	20584	16014	24357		1.43164
46	3775	29652.2	27254	31756			46	4022	20524.4	15911	24419		1.44473
47	3775	29674.2	27321	32089			47	4022	20594.6	16097	24485		1.44087
48	3775	29611.4	27327	32001			48	4022	20507.3	15970	24495		1.44394
49	3775	29181	26714	31398			49	4022	20653.8	15836	24630		1.41286
50	3775	28307.8	25946	30627			50	4022	20723.9	16013	25263		1.36595
51	3775	27747.4	25589	30332			51	4022	21001.7	16400	24925		1.3212
52	3775	27122.7	24909	29181			52	4022	21296.9	16373	25034		1.27355
53	3775	26450.9	24185	28577			53	4022	21450.1	16549	25602		1.23314
54	3775	25881.5	23575	28060			54	4022	21693.3	16875	25808		1.19306
55	3775	25247	23224	27324			55	4022	21583.8	16972	25620		1.16972
56	3775	24863.3	22997	26806			56	4022	21832.9	17088	26051		1.1388
57	3775	24517.1	22464	26331			57	4022	22067.8	17478	26329		1.11099
58	3775	24089.8	21997	26764			58	4022	22309.2	17573	26715		1.07982
59	3775	23782.4	21504	25879			59	4022	22453.2	17645	26854		1.0592
60	3775	23595.9	21800	25560			60	4022	22828.1	18185	27956		1.03364
61	3775	23126.7	21385	24861			61	4022	22639.1	17926	27017		1.02154
62	3775	22880.8	20772	24728			62	4022	22682.3	17662	27349		1.00875
63	3775	22573.1	20370	24189			63	4022	22742.3	17656	27356		0.992563
64	3775	22495	20232	24171			64	4022	22928.1	18134	27330		0.981111
65	3775	22268.3	20236	24095			65	4022	22989.5	18232	27124		0.968632
66	3775	22073.7	19997	23703			66	4022	22975.3	18253	27475		0.960756
67	3775	21966.6	19733	23668			67	4022	23137.4	18463	27515		0.949401
68	3775	22062.3	19644	24042			68	4022	23394.5	18525	27879		0.943054
69	3775	21896.3	19711	23837			69	4022	23519.7	18638	28348		0.930979
70	3775	21756	19583	23446			70	4022	23586.8	18448	28010		0.922383
71	3775	21555.6	19341	23166			71	4022	23569.1	18260	27881		0.914568
72	3775	21481.6	19263	23169			72	4022	23482.6	18581	27733		0.914788
73	3775	21433.1	19260	23670			73	4022	23683.8	18822	28113		0.904966
74	3775	21382	19341	23629			74	4022	23793	18707	28055		0.898668
75	3775	21252.9	18989	23169			75	4022	23719.8	18928	28083		0.895998
76	3775	21308.9	19197	23377			76	4022	23973.1	18979	28196		0.888865
77	3775	21313.1	19066	23246			77	4022	24056.6	18851	28541		0.885958
78	3775	21142	18981	22945			78	4022	24080.5	18990	28336		0.877972
79	3775	21058.3	18841	22757			79	4022	24130.6	19403	28649		0.872682
80	3775	21030.4	19087	22629			80	4022	24253.2	19543	28740		0.867116
81	3775	21130.2	19036	22844			81	4022	24422.7	19489	29308		0.865185
82	3775	20997.1	18951	22911			82	4022	24446.7	19545	29046		0.858892
83	3775	21015.4	18983	23151			83	4022	24591.8	19738	29152		0.854568
84	3775	20878.9	18719	23039			84	4022	24386.4	19068	29271		0.856168
85	3775	20857.8	18957	22859			85	4022	24357.4	19535	28907		0.856326
86	3775	20641	18592	22363			86	4022	23993.7	18964	28857		0.86027
87	3775	20567.1	18406	22627			87	4022	23775	18621	28247		0.865072
88	3775	20603.7	18752	22333			88	4022	24083.1	19337	28284		0.855527
89	3775	20615.6	18800	22608			89	4022	24155.1	19075	28523		0.853471
90	3775	20498.9	18721	22413			90	4022	24061.2	19342	28524		0.851952
91	3775	20525.4	18727	22516			91	4022	24058	19441	28164		0.853164
92	3775	20737.1	18982	22560			92	4022	24299.7	19634	28460		0.853387
93	3775	20464.6	18584	22516			93	4022	24204.6	19562	28774		0.845486

## Sheet: Control Cell4
Frame Number	Nuclear ROI Volume (pixels)	Nuclear Mean Intensity	Nuclear Min Intensity	Nuclear Max Intensity			Frame Number	Cytosol ROI Volume (pixels)	Cytosol Mean Intensity	Cytosol Min Intensity	Cytosol Max Intensity		N/C
1	4602	11674.6	9979	13431			1	10141	21339.9	18476	23559		0.547082
2	4602	11858	10120	13517			2	10141	21730.4	19078	23719		0.545687
3	4602	11793.1	10052	13719			3	10141	21718.6	19261	23684		0.542993
4	4602	11844.6	10077	13423			4	10141	21867	19430	24003		0.541666
5	4602	11842.8	10292	13453			5	10141	21953.7	19400	24074		0.539443
6	4602	11871.9	10214	13539			6	10141	22269.1	19803	24816		0.533109
7	4602	12041.2	10404	13629			7	10141	22418.7	19965	24495		0.537107
8	4602	12029.2	10233	13599			8	10141	22304.6	19563	24468		0.539314
9	4602	13047.7	11255	14730			9	10141	22199.9	19838	24207		0.587737
10	4602	13890.9	11924	15671			10	10141	21782.3	19242	23836		0.637716
11	4602	14698.6	12794	16478			11	10141	21545.2	19117	23626		0.682224
12	4602	15474.2	13449	17389			12	10141	21354.9	18859	23192		0.724621
13	4602	16104.8	13842	17967			13	10141	21161.6	18482	23041		0.761038
14	4602	16662.7	14546	18603			14	10141	20935.8	18178	22723		0.795893
15	4602	17340.6	15063	19339			15	10141	20852	18097	22712		0.831603
16	4602	17794.3	15459	19623			16	10141	20644.5	17828	22675		0.861938
17	4602	18254.2	16040	20239			17	10141	20562.6	17693	22828		0.887738
18	4602	18770	16478	20803			18	10141	20546.2	17942	23031		0.913552
19	4602	18989.1	16712	21272			19	10141	20423.9	17603	22932		0.929748
20	4602	19481.2	17035	21684			20	10141	20389.2	17432	22849		0.955467
21	4602	19768.4	17398	21805			21	10141	20240	17615	22699		0.976697
22	4602	19972.6	17643	22122			22	10141	20093.4	17166	22288		0.993987
23	4602	20193.5	17877	22373			23	10141	19901.5	17289	22233		1.01467
24	4602	20691.4	18330	23029			24	10141	19963.8	17024	22454		1.03644
25	4602	21107.9	18546	23480			25	10141	20117.9	17258	22698		1.04921
26	4602	21444.8	18739	23877			26	10141	19965.7	16907	22275		1.07408
27	4602	21658.2	19019	24185			27	10141	19896.7	16576	22624		1.08853
28	4602	21803	19267	24319			28	10141	19823.3	16646	22615		1.09987
29	4602	22033.3	19208	24568			29	10141	19791.3	16406	22790		1.11329
30	4602	22283.6	19675	24708			30	10141	19743.1	16526	22860		1.12868
31	4602	22291.7	19654	25035			31	10141	19766.6	16317	22929		1.12775
32	4602	22509.8	19930	25285			32	10141	19825.9	16291	22978		1.13537
33	4602	22622.2	20028	25335			33	10141	19713.5	16183	23036		1.14755
34	4602	22770.9	20042	25131			34	10141	19815.2	16132	23128		1.14917
35	4602	22725.9	20138	25480			35	10141	19730.9	16146	23380		1.15179
36	4602	22869.1	20118	25501			36	10141	19724.1	16199	23126		1.15945
37	4602	23229.5	20320	25926			37	10141	19839.2	15935	23443		1.17089
38	4602	23282.2	20590	26150			38	10141	19823.1	16279	23805		1.1745
39	4602	23292.2	20653	25937			39	10141	19649.6	16096	24033		1.18538
40	4602	23513.1	20936	26337			40	10141	19568.5	15807	23762		1.20158
41	4602	23557.9	20766	26173			41	10141	19486.7	15806	23543		1.20892
42	4602	23692.6	21073	26004			42	10141	19421.9	15624	23238		1.21989
43	4602	23860.4	21267	26329			43	10141	19416.4	15476	23412		1.22888
44	4602	23713.2	20920	26143			44	10141	19213	15448	23457		1.23423
45	4602	23837.5	21108	26342			45	10141	19239.7	15360	23334		1.23898
46	4602	24092.9	21306	26472			46	10141	19277.5	15245	23203		1.24979
47	4602	23976.1	21049	26587			47	10141	19248.2	15213	23406		1.24563
48	4602	23994.7	20799	26466			48	10141	19387.3	15467	23895		1.23765
49	4602	23118.4	20101	25517			49	10141	19474.4	15887	23385		1.18712
50	4602	22565.8	19740	24861			50	10141	19953.2	15998	24036		1.13093
51	4602	21774.5	19143	24202			51	10141	20343.1	16590	23902		1.07036
52	4602	20969.5	18294	23239			52	10141	20629.2	16533	24103		1.0165
53	4602	20124.6	17452	22634			53	10141	20853.2	17147	24514		0.96506
54	4602	19384	16806	21768			54	10141	20979.5	17403	23954		0.92395
55	4602	19103.3	16683	21522			55	10141	21612.7	17885	24922		0.883893
56	4602	18471	16133	21193			56	10141	21770.2	18276	24967		0.848454
57	4602	18142.9	15525	20348			57	10141	22075.2	18521	24820		0.821866
58	4602	17739.6	15581	19761			58	10141	22200.6	18519	25128		0.799058
59	4602	17499.1	15250	19583			59	10141	22405.6	18614	25437		0.781012
60	4602	17190.2	15088	19176			60	10141	22519.3	18819	25389		0.763356
61	4602	16925.3	14900	19011			61	10141	22658.2	18759	25596		0.746982
62	4602	16705.9	14422	18656			62	10141	22690.8	18762	25819		0.736242
63	4602	16375.9	14313	18137			63	10141	22741.4	18812	25353		0.720094
64	4602	16268.2	14152	18303			64	10141	22853.9	19089	25558		0.711835
65	4602	16125.1	14161	18064			65	10141	23045.5	19372	25617		0.699706
66	4602	16108.7	14106	17911			66	10141	23192.7	19378	25730		0.694561
67	4602	16039.2	14106	18123			67	10141	23306	19632	25931		0.688201
68	4602	15877.7	13881	17957			68	10141	23202.1	19772	26113		0.684325
69	4602	15722.9	13615	17717			69	10141	23245.3	19521	25799		0.676389
70	4602	15578.8	13607	17568			70	10141	23234	19941	25921		0.670516
71	4602	15596.6	13273	17562			71	10141	23432	20475	26158		0.665614
72	4602	15440.7	13279	17377			72	10141	23442.9	20213	26002		0.658649
73	4602	15438.6	13161	17456			73	10141	23599.5	20720	26367		0.654191
74	4602	15291.5	13263	17364			74	10141	23568.3	20404	26190		0.648816
75	4602	15143	12863	17244			75	10141	23561.3	20652	26310		0.642708
76	4602	15258.3	13172	17335			76	10141	23835.2	20652	26470		0.640158
77	4602	15056.4	12995	17319			77	10141	23674.6	20555	26272		0.635973
78	4602	14905.2	12729	17033			78	10141	23753.3	20527	26412		0.627499
79	4602	14810	12600	17189			79	10141	23683.9	20449	26308		0.625321
80	4602	14878.6	12853	16861			80	10141	23676.3	20392	26269		0.62842
81	4602	14968.7	12643	16860			81	10141	23837.6	20627	26051		0.627944
82	4602	14877	12655	16975			82	10141	23646.1	20514	26006		0.629151
83	4602	14878.8	12641	17015			83	10141	23567.6	20801	26267		0.631326
84	4602	14840.6	12650	16892			84	10141	23581.6	20955	25930		0.629331
85	4602	14862.5	12664	17149			85	10141	23747.6	21136	26039		0.625853
86	4602	15036.9	12767	17291			86	10141	23958.5	20983	26298		0.62762
87	4602	14957.7	12714	17064			87	10141	23905.7	21102	26187		0.625694
88	4602	14934.5	12743	17036			88	10141	23771.9	21128	25903		0.628242
89	4602	14832.1	12612	16816			89	10141	23742.9	20316	26124		0.624696
90	4602	14583.8	12234	16791			90	10141	23603.5	21022	26134		0.617869
91	4602	14679.4	12268	16718			91	10141	23697.3	20945	26149		0.619453
92	4602	14752.1	12386	17088			92	10141	23684.4	20178	26175		0.622863
93	4602	14725.3	12355	16854			93	10141	23425.9	20854	25907		0.628591

## Sheet: Control Cell5
Frame Number	Nuclear ROI Volume (pixels)	Nuclear Mean Intensity	Nuclear Min Intensity	Nuclear Max Intensity			Frame Number	Cytosol ROI Volume (pixels)	Cytosol Mean Intensity	Cytosol Min Intensity	Cytosol Max Intensity		N/C
1	4550	10279.7	8988	11816			1	4361	14965.3	12898	16407		0.6869
2	4550	10263.6	8839	11786			2	4361	15041	12904	16433		0.682375
3	4550	10321.9	8954	11818			3	4361	15012.8	12965	16584		0.687544
4	4550	10394.6	9133	11823			4	4361	15156.9	13242	16678		0.685798
5	4550	10436.8	8789	12030			5	4361	15262	13296	16777		0.683842
6	4550	10447.5	9184	11951			6	4361	15343.6	13102	16667		0.680903
7	4550	10510.8	9124	12082			7	4361	15488.6	13690	16864		0.678615
8	4550	10511.2	9213	12027			8	4361	15594.5	13733	16758		0.674033
9	4550	11290.2	10146	12750			9	4361	15790.1	14145	17246		0.715019
10	4550	11776.1	10699	13017			10	4361	15570.3	14054	17074		0.756318
11	4550	12261	11240	13480			11	4361	15421.3	13671	16684		0.795065
12	4550	12726	11658	13973			12	4361	15396.4	13620	16606		0.826556
13	4550	13153.5	12241	14248			13	4361	15300.7	13480	16618		0.85967
14	4550	13619.6	12538	14720			14	4361	15275.9	13311	16721		0.891576
15	4550	13924.4	12958	14951			15	4361	15070.3	13240	16436		0.923964
16	4550	14253.6	13341	15242			16	4361	14967.2	13273	16303		0.952322
17	4550	14527.8	13648	15483			17	4361	14806.7	13140	16335		0.981166
18	4550	14834.6	13832	15757			18	4361	14759.5	12932	16209		1.00509
19	4550	15020.2	13791	15922			19	4361	14578.2	12838	16204		1.03032
20	4550	15342.8	14285	16342			20	4361	14616.3	12848	16271		1.04971
21	4550	15478.4	14460	16463			21	4361	14567.3	12673	16226		1.06255
22	4550	15880.5	14658	16934			22	4361	14701.2	12469	16590		1.08022
23	4550	15944.4	14990	16944			23	4361	14574.4	12674	16690		1.094
24	4550	16085.2	15043	17273			24	4361	14515.4	12632	16655		1.10815
25	4550	16306.7	15148	17646			25	4361	14548.7	12728	16573		1.12083
26	4550	16466.6	15477	17433			26	4361	14525.1	12510	16360		1.13366
27	4550	16562.7	15476	17942			27	4361	14477.8	12604	16643		1.144
28	4550	16800.4	15597	18201			28	4361	14537.2	12774	16292		1.15568
29	4550	16964	15809	18246			29	4361	14480.7	12568	16305		1.17149
30	4550	17041.1	16027	18186			30	4361	14462.4	12470	16672		1.17831
31	4550	17251.4	16136	18467			31	4361	14501.9	12390	16905		1.18959
32	4550	17282.7	16076	18450			32	4361	14395	12550	16406		1.2006
33	4550	17498.1	16330	18842			33	4361	14381.1	12522	16454		1.21675
34	4550	17549.1	16327	18805			34	4361	14280	12316	16471		1.22893
35	4550	17616.9	16391	18944			35	4361	14250	12277	16503		1.23628
36	4550	17731.7	16493	18964			36	4361	14251.6	12223	16483		1.24419
37	4550	17829.1	16586	19107			37	4361	14264.8	12214	16358		1.24986
38	4550	17834.1	16539	18974			38	4361	14256.6	12318	16560		1.25094
39	4550	18023.8	16700	19266			39	4361	14286.2	11852	16332		1.26162
40	4550	17960.3	16810	19411			40	4361	14171.4	12189	16426		1.26736
41	4550	18081.1	16805	19473			41	4361	14165.6	12256	16343		1.27641
42	4550	18160.1	16883	19432			42	4361	14074.1	11849	16317		1.29032
43	4550	18240.7	17012	19559			43	4361	14109.6	12051	16632		1.29279
44	4550	18474.8	17023	20087			44	4361	14246.8	11981	16253		1.29677
45	4550	18110.2	16721	19375			45	4361	13872.5	11676	16031		1.30547
46	4550	18451.8	17191	19764			46	4361	14073.1	12155	16027		1.31114
47	4550	18352.1	17027	19588			47	4361	14017.9	11924	16177		1.30919
48	4550	18375.2	17088	19844			48	4361	14035	11974	16155		1.30924
49	4550	17984.4	16699	19340			49	4361	14115.8	12210	16270		1.27407
50	4550	17515.7	16263	18727			50	4361	14302.4	12223	16622		1.22467
51	4550	17032	15670	18259			51	4361	14531	12467	16762		1.17211
52	4550	16486.3	15029	17590			52	4361	14691	12678	16861		1.12221
53	4550	15972.5	14815	17024			53	4361	14805	12886	16873		1.07886
54	4550	15661.5	14466	16839			54	4361	14963.8	13138	17120		1.04663
55	4550	15456.3	14399	16703			55	4361	15161.4	13104	17023		1.01945
56	4550	15144.2	14007	16468			56	4361	15256.6	13351	17046		0.992629
57	4550	14820.6	13712	16046			57	4361	15300.4	13599	17094		0.96864
58	4550	14609	13478	15824			58	4361	15481.4	13712	17122		0.943646
59	4550	14369.1	13238	15491			59	4361	15575.1	13782	17203		0.922567
60	4550	14174.5	13053	15599			60	4361	15664.1	13481	17665		0.904903
61	4550	14022.6	12781	15607			61	4361	15857.9	14151	17547		0.884272
62	4550	13827.7	12669	15111			62	4361	15931.1	14011	17835		0.867971
63	4550	13676.6	12456	15130			63	4361	15943.1	13831	17621		0.857836
64	4550	13755.2	12491	15126			64	4361	16185.8	14358	17703		0.849835
65	4550	13454.7	12226	14901			65	4361	16027.1	14016	17786		0.839492
66	4550	13459.5	12065	14938			66	4361	16209.5	14131	17797		0.830347
67	4550	13251.2	11923	14526			67	4361	16189.9	14183	17733		0.818486
68	4550	13173.2	11912	14668			68	4361	16211.8	14367	17785		0.812569
69	4550	13064.4	11770	14518			69	4361	16254.6	14511	17673		0.803737
70	4550	12996.1	11717	14517			70	4361	16332.8	14392	18170		0.795705
71	4550	12896.3	11437	14335			71	4361	16272.5	14451	17962		0.792522
72	4550	12747.4	11377	14177			72	4361	16188	14232	17779		0.787458
73	4550	12741.1	11547	14118			73	4361	16306.9	14482	17896		0.78133
74	4550	12683.7	11490	14047			74	4361	16407.6	14576	17927		0.773042
75	4550	12689.4	11362	14324			75	4361	16546.4	14543	18456		0.766897
76	4550	12563.9	11346	13962			76	4361	16421.3	14413	18013		0.765097
77	4550	12489.3	11189	13964			77	4361	16327.7	14599	17934		0.764918
78	4550	12466	11178	14058			78	4361	16323.6	14464	17976		0.763681
79	4550	12430.8	11254	13734			79	4361	16275.7	14564	17716		0.763765
80	4550	12436.8	10966	14120			80	4361	16335.9	14523	17871		0.761317
81	4550	12508.6	11275	14014			81	4361	16451	14429	17932		0.760356
82	4550	12488.3	11212	13935			82	4361	16495.8	14552	18124		0.757057
83	4550	12365	11135	13902			83	4361	16259.9	14377	17869		0.76046
84	4550	12400	11115	13977			84	4361	16406.7	14575	18663		0.755792
85	4550	12303.2	10830	13710			85	4361	16360.8	14115	18198		0.751992
86	4550	12302.3	10876	13955			86	4361	16376.4	14539	18128		0.751223
87	4550	12304.2	10828	13780			87	4361	16350.7	14329	18084		0.752516
88	4550	12239.8	10882	13728			88	4361	16331.2	14364	18290		0.749472
89	4550	12272.8	10777	13622			89	4361	16340.7	14334	18095		0.751061
90	4550	12300.4	11019	13824			90	4361	16295.5	14208	17983		0.754831
91	4550	12219.5	10824	13816			91	4361	16118.8	14029	17935		0.758093
92	4550	12101.7	10693	13759			92	4361	16040.2	14133	17663		0.754461
93	4550	12197.9	10731	13602			93	4361	16073.7	14102	17712		0.758877

## Sheet: Control Cell6
Frame Number	Nuclear ROI Volume (pixels)	Nuclear Mean Intensity	Nuclear Min Intensity	Nuclear Max Intensity			Frame Number	Cytosol ROI Volume (pixels)	Cytosol Mean Intensity	Cytosol Min Intensity	Cytosol Max Intensity		N/C
1	3537	13698.9	12424	14855			1	6820	18082.2	16108	19798		0.75759
2	3537	13904.2	12325	15225			2	6820	18400.4	16362	20044		0.755648
3	3537	13991.7	12354	15217			3	6820	18546.1	16385	20361		0.754431
4	3537	14017.3	12420	15437			4	6820	18585.7	16323	20546		0.754198
5	3537	13960.3	12353	15183			5	6820	18395.3	16286	20282		0.758903
6	3537	14099.4	12656	15400			6	6820	18500.7	16368	20378		0.762101
7	3537	14166.7	12694	15412			7	6820	18558.6	16550	20493		0.763349
8	3537	14186.6	12629	15559			8	6820	18709.3	16413	20629		0.758262
9	3537	15079.9	13569	16450			9	6820	18604.8	16252	20517		0.810539
10	3537	15995	14367	17405			10	6820	18647.2	16174	20713		0.857771
11	3537	16715.3	15055	18003			11	6820	18352.2	15565	20305		0.910809
12	3537	17439.5	15480	18802			12	6820	18501.7	15448	20840		0.94259
13	3537	18086.9	16091	19487			13	6820	18410.6	15237	20753		0.982418
14	3537	18797.5	16794	20074			14	6820	18532.7	15188	21282		1.01429
15	3537	19228.6	17101	20486			15	6820	18254.3	15001	20747		1.05338
16	3537	19780.1	17744	21055			16	6820	18144.4	15108	20909		1.09015
17	3537	20163	18059	21418			17	6820	18060.8	14911	20625		1.11639
18	3537	20517.8	18605	21718			18	6820	17904.7	14678	20485		1.14595
19	3537	20813.4	18679	22078			19	6820	17825.8	14734	20582		1.1676
20	3537	21038.1	18369	22519			20	6820	17738.6	14704	20452		1.18601
21	3537	21468.2	19124	22846			21	6820	17815.7	14832	20653		1.20501
22	3537	21757	19456	23303			22	6820	17790.5	14641	20534		1.22296
23	3537	21907	19461	23480			23	6820	17671.8	14506	20613		1.23966
24	3537	22392.6	20030	23827			24	6820	17804.5	14494	20672		1.25769
25	3537	22601.8	20065	24298			25	6820	17717.8	14413	20693		1.27566
26	3537	22934.9	20382	24373			26	6820	17801.1	14737	20760		1.2884
27	3537	23435.3	20786	24912			27	6820	18012	14803	21302		1.3011
28	3537	23395.8	20950	24848			28	6820	17808.4	14520	21078		1.31375
29	3537	23588.1	20908	25093			29	6820	17780.5	14410	20845		1.32662
30	3537	23712.1	21205	25202			30	6820	17762.1	14401	20945		1.33499
31	3537	23829.2	20869	25219			31	6820	17631.5	14514	20747		1.35151
32	3537	23956.8	21706	25491			32	6820	17576.5	14374	20658		1.363
33	3537	23944	21631	25254			33	6820	17438.6	14210	20609		1.37305
34	3537	24135	21435	25511			34	6820	17430.4	14081	20463		1.38465
35	3537	24215	21891	25777			35	6820	17310.1	13862	20485		1.3989
36	3537	24360.9	21803	26035			36	6820	17387.9	14182	20268		1.40102
37	3537	24324.9	21931	25863			37	6820	17225.5	14019	20288		1.41215
38	3537	24681.3	22574	26134			38	6820	17328.9	13909	20343		1.42428
39	3537	24610.1	22391	26134			39	6820	17225.3	13919	20322		1.42872
40	3537	24815.2	22580	26319			40	6820	17394.1	13799	20416		1.42664
41	3537	24860.3	22921	26484			41	6820	17239	14068	20274		1.4421
42	3537	24787.1	23060	26296			42	6820	17094.1	14042	20166		1.45004
43	3537	25076.1	23145	26673			43	6820	17109.9	14034	20681		1.46559
44	3537	25120.2	23387	26857			44	6820	17123.2	14021	20393		1.46703
45	3537	25136.6	23174	26628			45	6820	17171.6	14049	20584		1.46384
46	3537	25147.7	23171	26575			46	6820	17252.6	14023	20411		1.45762
47	3537	24896.3	22756	26421			47	6820	17079.9	13700	20292		1.45764
48	3537	24868.4	23092	26226			48	6820	17114.7	13995	20320		1.45304
49	3537	24287.5	22686	25794			49	6820	17113.3	13846	20365		1.41921
50	3537	23644	21910	24953			50	6820	17260.5	14305	20615		1.36983
51	3537	23000.1	21127	24541			51	6820	17429.4	14554	20505		1.31961
52	3537	22483.9	20975	23965			52	6820	17682.1	14719	21125		1.27156
53	3537	21787.4	20371	22924			53	6820	17843.1	15207	20989		1.22105
54	3537	21386.5	20081	22544			54	6820	18068.2	15256	20924		1.18366
55	3537	20808.2	19327	22160			55	6820	18059	15317	21050		1.15223
56	3537	20544.7	19298	21665			56	6820	18379.6	15831	21320		1.1178
57	3537	19956.2	18650	21297			57	6820	18276.2	15627	21070		1.09192
58	3537	19522.5	18339	20757			58	6820	18181.8	15331	20985		1.07374
59	3537	19289.4	18139	20876			59	6820	18401.3	15866	21420		1.04826
60	3537	18881.4	17562	20250			60	6820	18290.4	15395	21472		1.03231
61	3537	18784.2	17328	20371			61	6820	18727.5	15845	21415		1.00303
62	3537	18434.4	17022	19738			62	6820	18605.9	15946	21474		0.990781
63	3537	18326.4	17133	19629			63	6820	18816.2	16066	21535		0.97397
64	3537	18189	17071	19726			64	6820	19014.1	16330	21663		0.956605
65	3537	17969.8	16764	20085			65	6820	18909.4	16010	21732		0.950307
66	3537	17869.5	16575	19423			66	6820	18903.9	15798	21662		0.945285
67	3537	17762.1	16423	19447			67	6820	18964.4	16063	22002		0.936604
68	3537	17639.2	16247	19121			68	6820	18911.1	16108	21587		0.932744
69	3537	17473.6	16099	19116			69	6820	18940.2	16325	21700		0.922565
70	3537	17441.2	16125	19102			70	6820	19038.4	16578	21904		0.916105
71	3537	17339.1	15933	18907			71	6820	19024.1	16635	21469		0.911427
72	3537	17389.5	16007	18914			72	6820	19256.1	17054	21587		0.903062
73	3537	17222.7	15948	18816			73	6820	19119.5	16743	21614		0.900796
74	3537	17171.5	15644	19029			74	6820	19139.2	16598	21624		0.89719
75	3537	17157.9	15938	18844			75	6820	19314.7	16853	22129		0.888334
76	3537	17083.5	15605	18821			76	6820	19148.8	16669	22134		0.892141
77	3537	17011.1	15625	18782			77	6820	19189.9	16833	21736		0.886464
78	3537	16916.8	15616	18614			78	6820	19073.2	16440	21565		0.886941
79	3537	16956.4	15798	18699			79	6820	19130	16416	21460		0.886374
80	3537	17000.5	15537	18885			80	6820	19200	16455	21972		0.88544
81	3537	16843.1	15523	18762			81	6820	19147.1	16596	21901		0.879667
82	3537	16723.4	15506	18675			82	6820	19115.3	16724	21718		0.874871
83	3537	16692.3	15358	18231			83	6820	19171.3	16550	21826		0.870694
84	3537	16834.1	15561	18462			84	6820	19285.5	16739	21991		0.872887
85	3537	16709.9	15195	18453			85	6820	18887.1	16338	21482		0.884724
86	3537	16735.3	15380	18221			86	6820	19103.2	16470	21948		0.876051
87	3537	16519.8	15241	18064			87	6820	18765	16181	21655		0.880352
88	3537	16647.7	15395	18258			88	6820	18893.1	16092	21687		0.881151
89	3537	16499.1	15183	18132			89	6820	18683.8	15757	21288		0.883069
90	3537	16424.7	15119	18033			90	6820	18574.6	15668	21271		0.884255
91	3537	16402.1	14862	18119			91	6820	18515.6	15628	21306		0.885855
92	3537	16543.3	15117	18258			92	6820	18778	15959	21430		0.880992
93	3537	16499.4	15361	18225			93	6820	18705.7	15800	21434		0.882052

## Sheet: Q69L Cell1
Frame Number	Nuclear ROI Volume (pixels)	Nuclear Mean Intensity	Nuclear Min Intensity	Nuclear Max Intensity		Frame Number	Cytosol ROI Volume (pixels)	Cytosol Mean Intensity	Cytosol Min Intensity	Cytosol Max Intensity			N/C
1	4832	5655.14	4757	6449		1	3234	5238.9	4286	5899			1.07945
2	4832	5587.03	4695	6526		2	3234	5166.69	4272	5853			1.08135
3	4832	5681.23	4692	6508		3	3234	5161.31	4315	5937			1.10073
4	4832	5680.52	4786	6495		4	3234	5134.8	4186	5886			1.10628
5	4832	5686.16	4804	6441		5	3234	5114.85	4177	5846			1.1117
6	4832	5692.06	4823	6457		6	3234	5155.43	4262	5776			1.10409
7	4832	5713.87	4862	6556		7	3234	5150.82	4196	5773			1.10931
8	4832	5716.07	4729	6625		8	3234	5256.98	4520	5899			1.08733
9	4832	5616.3	4708	6436		9	3234	5287.51	4554	5915			1.06218
10	4832	5540.85	4525	6368		10	3234	5332.05	4652	5868			1.03916
11	4832	5471.2	4617	6416		11	3234	5364.88	4692	5952			1.01982
12	4832	5443.36	4558	6349		12	3234	5438.16	4841	6047			1.00096
13	4832	5388.76	4431	6336		13	3234	5396.13	4782	5982			0.998634
14	4832	5365.77	4393	6318		14	3234	5432.11	4772	6010			0.987789
15	4832	5304.03	4120	6209		15	3234	5441.07	4797	6000			0.974813
16	4832	5299.26	4170	6307		16	3234	5421.43	4679	6014			0.977466
17	4832	5211.58	3970	6068		17	3234	5434.15	4661	6072			0.959043
18	4832	5222.16	4024	6177		18	3234	5508.57	4810	6217			0.948006
19	4832	5214.44	4168	6086		19	3234	5525.92	4780	6041			0.943633
20	4832	5187.33	4279	5977		20	3234	5603.12	4818	6222			0.925792
21	4832	5144.35	3974	5981		21	3234	5586.15	4890	6337			0.920912
22	4832	5080.4	3996	6021		22	3234	5583.47	4851	6182			0.909899
23	4832	5013.35	3899	5900		23	3234	5588.58	4994	6176			0.89707
24	4832	4994.88	3949	6006		24	3234	5585.95	4980	6154			0.894185
25	4832	4936.67	3951	5894		25	3234	5572.03	4972	6173			0.885972
26	4832	4903.1	3842	5766		26	3234	5567.87	4914	6153			0.880606
27	4832	4861.77	3895	5775		27	3234	5559.16	4878	6140			0.874551
28	4832	4871.88	3871	5882		28	3234	5579.99	4948	6156			0.873098
29	4832	4886.97	4032	5714		29	3234	5633.17	4959	6246			0.867534
30	4832	4827.02	3838	5616		30	3234	5619.27	4972	6225			0.859012
31	4832	4887.95	4017	5822		31	3234	5625.87	5010	6290			0.868834
32	4832	4936.13	4043	5825		32	3234	5635.78	4992	6251			0.875855
33	4832	4889.06	4000	5772		33	3234	5634.42	5103	6362			0.867713
34	4832	4850.02	3865	5711		34	3234	5635.91	5024	6214			0.860557
35	4832	4779.9	3754	5665		35	3234	5623.69	5004	6163			0.849959
36	4832	4738.31	3712	5705		36	3234	5595.18	4959	6261			0.846857
37	4832	4702.58	3727	5642		37	3234	5626.19	4976	6267			0.835838
38	4832	4657.49	3802	5544		38	3234	5598.43	5052	6224			0.831928
39	4832	4681.73	3862	5543		39	3234	5591.41	4859	6318			0.837307
40	4832	4691.53	3824	5735		40	3234	5581.76	4910	6138			0.840511
41	4832	4668.11	3781	5742		41	3234	5586.58	4968	6157			0.835593
42	4832	4666.86	3828	5678		42	3234	5549.25	4865	6250			0.84099
43	4832	4643.8	3840	5513		43	3234	5520.55	4843	6153			0.841184
44	4832	4695.43	3872	5522		44	3234	5507.45	4946	6245			0.852558
45	4832	4701.55	3852	5507		45	3234	5481.43	4910	6005			0.857724
46	4832	4692.03	3878	5496		46	3234	5422.04	4755	6123			0.865364
47	4832	4686.35	3807	5530		47	3234	5404.17	4830	6048			0.867173
48	4832	4922	4007	5752		48	3234	5348.84	4716	5943			0.920199
49	4832	4910.01	4051	5872		49	3234	5331.55	4663	6019			0.920936
50	4832	4907.27	3977	5935		50	3234	5324.38	4707	5951			0.921659
51	4832	4903.24	4019	5809		51	3234	5339.6	4744	6157			0.918278
52	4832	4901.75	4074	5805		52	3234	5285.56	4708	6121			0.927385
53	4832	4880.9	4027	5800		53	3234	5270.14	4560	5989			0.926143
54	4832	4889.93	4141	5806		54	3234	5284.34	4757	5929			0.925362
55	4832	4932.57	4071	5830		55	3234	5262.73	4593	5963			0.937265
56	4832	4887.59	4137	5753		56	3234	5286.29	4670	5998			0.924578
57	4832	4859.42	4070	5681		57	3234	5253.23	4605	5942			0.925034
58	4832	4917.78	4011	5893		58	3234	5295.14	4700	5955			0.928734
59	4832	4879.57	4025	5796		59	3234	5311.09	4680	5996			0.918753
60	4832	4840.01	3876	5733		60	3234	5243.44	4626	5897			0.92306
61	4832	4866.56	3943	5699		61	3234	5242.96	4632	5909			0.928208
62	4832	4896.3	4032	5625		62	3234	5214.92	4593	5860			0.938903
63	4832	4894.09	4055	5755		63	3234	5187.68	4452	5844			0.943407
64	4832	4869.64	3919	5687		64	3234	5184	4632	5853			0.939359
65	4832	4822.97	3890	5640		65	3234	5155.22	4574	5730			0.935551
66	4832	4842.62	3907	5694		66	3234	5135.69	4543	5739			0.942935
67	4832	4851.75	3813	5682		67	3234	5092.31	4465	5667			0.952761
68	4832	4807.03	3879	5649		68	3234	5109.39	4428	5722			0.940822
69	4832	4778.15	3946	5604		69	3234	5090.72	4486	5799			0.938601
70	4832	4770.6	3894	5639		70	3234	5097.42	4458	5858			0.935886
71	4832	4772.28	3724	5643		71	3234	5062.29	4477	5789			0.942712
72	4832	4767.58	3843	5530		72	3234	5053.26	4535	5767			0.943466
73	4832	4793.69	3889	5573		73	3234	4990.13	4416	5607			0.960635
74	4832	4779.99	3816	5569		74	3234	4964.81	4265	5564			0.962774
75	4832	4757.5	3950	5528		75	3234	4981.32	4320	5567			0.955068
76	4832	4747.65	3920	5511		76	3234	5000.39	4370	5822			0.949455
77	4832	4718.33	3824	5413		77	3234	5043.98	4464	5591			0.935438
78	4832	4707.85	3924	5605		78	3234	5068.76	4403	5878			0.928797
79	4832	4730.15	3871	5475		79	3234	5063.73	4269	5610			0.934124
80	4832	4755.9	3859	5599		80	3234	5024.52	4354	5641			0.946538
81	4832	4736.34	3922	5536		81	3234	5004.19	4333	5655			0.946475
82	4832	4743.19	3925	5470		82	3234	4956.84	4386	5717			0.956897
83	4832	4680.51	3704	5699		83	3234	4875.5	4273	5429			0.960006
84	4832	4609.76	3674	5570		84	3234	4842.96	4239	5426			0.951848
85	4832	4586.99	3692	5381		85	3234	4851.94	4234	5499			0.945393
86	4832	4568.4	3685	5548		86	3234	4833.41	4240	5492			0.94517
87	4832	4609.14	3538	5440		87	3234	4827.89	4191	5573			0.954691
88	4832	4613.12	3573	5518		88	3234	4805.83	4123	5448			0.959902
89	4832	4586.24	3663	5379		89	3234	4774.2	4173	5404			0.96063
90	4832	4635.69	3614	5473		90	3234	4747.31	4043	5394			0.976489
91	4832	4608.66	3630	5337		91	3234	4698.49	4139	5275			0.980879
92	4832	4622.35	3673	5438		92	3234	4664.08	4071	5247			0.991053
93	4832	4607.88	3702	5548		93	3234	4630.28	4069	5340			0.995161

## Sheet: Q69L Cell2
Frame Number	Nuclear ROI Volume (pixels)	Nuclear Mean Intensity	Nuclear Min Intensity	Nuclear Max Intensity		Frame Number	Cytosol ROI Volume (pixels)	Cytosol Mean Intensity	Cytosol Min Intensity	Cytosol Max Intensity			N/C
1	6557	16980.6	15312	18889		1	3470	16493.6	15259	17770			0.971323
2	6557	16887.9	14988	18984		2	3470	16345.7	15018	17531			0.967893
3	6557	16863.1	14997	18649		3	3470	16391.8	15063	17559			0.972047
4	6557	16874.7	14934	18556		4	3470	16387.5	14994	17519			0.971126
5	6557	16924.8	14894	18495		5	3470	16532.3	14966	17728			0.97681
6	6557	17088.2	15141	18658		6	3470	16636.5	15143	17926			0.973566
7	6557	17170.3	15388	18912		7	3470	16742.7	15251	17932			0.975097
8	6557	17267.2	15455	18903		8	3470	16794.2	15477	18126			0.972604
9	6557	17183.8	15260	18967		9	3470	16935.7	15102	18176			0.98556
10	6557	16975.3	15115	18634		10	3470	16856.2	15491	18025			0.992988
11	6557	16872.4	14972	18663		11	3470	16747.9	15065	18134			0.992624
12	6557	16738.9	14758	18574		12	3470	16716.8	14901	18136			0.998675
13	6557	16542	14609	18577		13	3470	16597.9	14769	18152			1.00338
14	6557	16439.7	14607	18254		14	3470	16569.3	14825	18047			1.00788
15	6557	16220.6	14393	18290		15	3470	16549.5	14854	18247			1.02028
16	6557	15990.4	14007	18263		16	3470	16478.9	14721	18004			1.03055
17	6557	15943.8	14049	18132		17	3470	16490.8	14600	18165			1.03431
18	6557	15877.4	13703	18161		18	3470	16406.5	14567	17980			1.03332
19	6557	15849.3	14005	18059		19	3470	16354.5	14528	18296			1.03187
20	6557	15770.4	13822	18127		20	3470	16380.1	14495	18352			1.03867
21	6557	15750.3	13795	17914		21	3470	16391.4	14475	18211			1.0407
22	6557	15650.1	13493	18000		22	3470	16373	14339	18236			1.04619
23	6557	15637	13471	17936		23	3470	16305.5	14175	18310			1.04275
24	6557	15691.2	13399	18281		24	3470	16427.1	14072	18368			1.0469
25	6557	15752.6	13538	18432		25	3470	16440.5	14044	18330			1.04367
26	6557	15784.2	13353	18124		26	3470	16463.9	14001	18381			1.04306
27	6557	15690.4	13494	18157		27	3470	16385.5	13955	18192			1.0443
28	6557	15543.7	13301	18125		28	3470	16365.5	13731	18255			1.05287
29	6557	15426.3	13274	18294		29	3470	16363.2	13988	18311			1.06073
30	6557	15398.3	13025	17924		30	3470	16399.4	13990	18483			1.06501
31	6557	15420.6	13286	18069		31	3470	16426	13945	18308			1.0652
32	6557	15402.6	13353	18063		32	3470	16546.5	14164	18550			1.07426
33	6557	15524.6	13462	18089		33	3470	16644.2	13985	18425			1.07211
34	6557	15599.3	13479	18290		34	3470	16740.7	14359	18614			1.07317
35	6557	15603.2	13420	18330		35	3470	16731.9	14183	18839			1.07234
36	6557	15724.1	13538	18443		36	3470	16656.9	14065	19015			1.05932
37	6557	15738	13510	18352		37	3470	16639.2	14117	18884			1.05726
38	6557	15750.5	13624	18282		38	3470	16654.4	14301	18655			1.05739
39	6557	15597.5	13442	18077		39	3470	16534.9	13980	18605			1.0601
40	6557	15628.1	13728	18166		40	3470	16613	13790	18598			1.06302
41	6557	15539.4	13617	18278		41	3470	16615.5	14172	18727			1.06925
42	6557	15489.2	13471	18154		42	3470	16616.3	14113	18810			1.07277
43	6557	15481.4	13338	18160		43	3470	16651.3	14002	18754			1.07557
44	6557	15330.7	13208	18350		44	3470	16526.9	13730	18550			1.07803
45	6557	15304.5	13269	18185		45	3470	16469.6	13665	18681			1.07612
46	6557	15335.7	13037	18169		46	3470	16497.2	13675	18838			1.07574
47	6557	15175.3	12957	18254		47	3470	16318.2	13500	18782			1.07531
48	6557	15087.1	12863	18291		48	3470	16256	13100	18893			1.07747
49	6557	14986.1	12719	18028		49	3470	16142.9	13179	18381			1.07719
50	6557	14981.9	12673	17989		50	3470	16119	13055	18396			1.0759
51	6557	15091.3	12799	17981		51	3470	16149.6	13266	18425			1.07013
52	6557	15066.3	12566	18160		52	3470	15974.8	12746	18429			1.06031
53	6557	15306.5	13023	18404		53	3470	15981.8	12938	18419			1.04412
54	6557	15366.5	12928	18535		54	3470	15857.3	13000	18160			1.03194
55	6557	15645.7	13385	18938		55	3470	15907.8	13095	18349			1.01675
56	6557	15892.4	13632	18798		56	3470	15990.9	13193	18317			1.0062
57	6557	15946.6	13735	18742		57	3470	15962.7	13267	18459			1.00101
58	6557	16147.7	14103	18784		58	3470	16025.2	13218	18179			0.992411
59	6557	16243.6	13570	18883		59	3470	16151.8	13019	18448			0.99435
60	6557	16356.2	14255	18837		60	3470	16256.3	13295	18318			0.993891
61	6557	16454.5	14239	18919		61	3470	16396.1	13332	18525			0.996452
62	6557	16469	14281	18858		62	3470	16365.5	13615	18608			0.993715
63	6557	16625.9	14535	19066		63	3470	16492.4	13554	18564			0.991969
64	6557	16675.2	14259	18887		64	3470	16534.3	13599	18426			0.991556
65	6557	16747.8	14537	18768		65	3470	16738.5	14041	18561			0.999445
66	6557	16592	14058	18845		66	3470	16681	14067	18702			1.00537
67	6557	16458.3	14146	18801		67	3470	16682.7	14007	18764			1.01364
68	6557	16449.3	14163	18871		68	3470	16784.7	14069	18616			1.02039
69	6557	16256.6	13796	18690		69	3470	16686.5	14388	18374			1.02645
70	6557	16216.5	13606	18581		70	3470	16760.9	14427	18555			1.03357
71	6557	16149.4	13235	18849		71	3470	16754.7	14547	18591			1.03748
72	6557	16023.9	13168	18860		72	3470	16686.6	14367	18658			1.04136
73	6557	15925.9	13127	18760		73	3470	16733.9	14613	18635			1.05074
74	6557	15978.1	13302	19055		74	3470	16597.2	14311	18186			1.03875
75	6557	16055.8	12924	19352		75	3470	16572.2	14273	18474			1.03216
76	6557	15978.4	13077	18823		76	3470	16466.5	14164	18177			1.03054
77	6557	15926	13100	18965		77	3470	16416.9	14383	18025			1.03082
78	6557	15929.5	12391	18860		78	3470	16407.4	14427	18093			1.03
79	6557	15906.6	12758	18698		79	3470	16304.5	14145	18009			1.02502
80	6557	15918.4	12411	18985		80	3470	16196.5	14098	17936			1.01747
81	6557	16072.9	12906	19525		81	3470	16305.1	14012	17923			1.01445
82	6557	15936.2	12044	19005		82	3470	16252.5	14333	17889			1.01985
83	6557	15887.9	12412	19641		83	3470	16296.7	14226	17839			1.02573
84	6557	15738.4	12264	19417		84	3470	16171	13785	17900			1.02749
85	6557	15705.1	12132	18801		85	3470	16043	13727	17651			1.02151
86	6557	15528.4	11589	18442		86	3470	15937.2	13816	17383			1.02633
87	6557	15512.5	11726	18591		87	3470	15929.7	13946	17593			1.02689
88	6557	15329.3	11536	18464		88	3470	15876.5	13835	17625			1.0357
89	6557	15108.7	11218	18347		89	3470	15833.6	13826	17518			1.04798
90	6557	15169.5	11281	18074		90	3470	15784.5	13610	17425			1.04055
91	6557	15175.3	11583	18139		91	3470	15723.7	13496	17200			1.03614
92	6557	15116.3	11728	18089		92	3470	15667.8	13621	17437			1.03649
93	6557	15111.6	11478	18019		93	3470	15549.5	13396	17159			1.02898

[truncated: 4 more sheets: Q69L Cell3, Q69L Cell4, Q69L Cell5, Q69L Cell6]
