# Supplementary material for: Conformation of the nuclear pore in living cells is modulated by transport state
Source: eLife. 2020 Dec 21;9:e60654. doi: 10.7554/eLife.60654 (PMC7752133; doi:10.7554/eLife.60654)
Supplement: Figure 5—figure supplement 1—source data 1. [file elife-60654-fig5-figsupp1-data1.xlsx]

## Sheet: Figure5--1ETranslocation
	plusKaps Average Intensity (AU)	minusKaps Average Intensity (AU)
Cell1	902.353	165.416
Cell2	1337.11	222.663
Cell3	1305.51	153.32
Cell4	917.611	129.729
Cell5	557.81	121.074
Mean	1004.08	158.44
Standard Deviation	323.555	40.0625

## Sheet: Figure5-1GKapAlphaIF
Kap1Alpha:
	No Ran Average Intensity (AU)	Plus Ran Average Intensity (AU)
Cell1	438.92	298.984
Cell2	528.985	324.758
Cell3	437.984	386.647
Cell4	531.806	421.025
Cell5	439.394	408.478
Mean	475.417	367.978
Standard Deviation	50.2001	53.458

## Sheet: Figure5-1HKapBetaIF
Kap1Beta:
	No Ran Average Intensity (AU)	Plus Ran Average Intensity (AU)
Cell1	6245.12	181.756
Cell2	5256.02	152.077
Cell3	6755.57	90.9989
Cell4	6662.76	286.21
Cell5	5543.8	248.901
Mean	6092.65	191.989
Standard Deviation	668.754	77.4812
