# Supplementary material for: Conformation of the nuclear pore in living cells is modulated by transport state
Source: eLife. 2020 Dec 21;9:e60654. doi: 10.7554/eLife.60654 (PMC7752133; doi:10.7554/eLife.60654)
Supplement: Figure 5—source data 1. [file elife-60654-fig5-data1.xlsx]

## Sheet: Figure5B_Nup133_PlusRan_PlusKap
Name	Nup133_t0	Nup133_t60_plusRan	Nup133_t90_plusKaps
Median	1.12409	1.13512	1.13887
First Quartile	1.05994	1.07227	1.08208
Third Quartile	1.2007	1.20717	1.20768
Data:	1.24146	1.16912	1.29928
	1.15985	1.25968	1.28614
	1.06833	1.28676	1.19844
	1.26449	1.19121	1.11325
	1.09276	1.26515	1.09127
	1.02295	1.38575	1.24846
	1.21655	1.01031	1.16295
	1.02889	1.04659	1.2
	1.23856	1.1324	0.987261
	1.38261	1.08782	0.991304
	1.17255	1.12315	1.15729
	1.08346	1.12722	1.16876
	1.31378	0.932489	1.05355
	1.13636	1.26911	1.09037
	1.12397	1.16616	1.01481
	1.15637	1.23333	1.34873
	1.13539	1.01079	1.09519
	1.193	1.12638	1.07334
	1.14	1.27603	1.14181
	1.06607	1.07368	1.11638
	1.18908	1.37302	1.1201
	1.19437	1.18782	1.05039
	1.13388	1.03926	1.04218
	1.29181	1.38419	1.34392
	1.28526	1.1049	1.16419
	1.05561	1.13023	1.16016
	1.2803	1.18831	1.0894
	1.13055	1.18458	1.1895
	1.01801	1.20087	1.17523
	1.18341	1.16919	1.19118
	1.38767	1.05385	1.12172
	1.21205	1.19915	1.2876
	1.14659	0.982063	1.25
	1.10507	1.04212	0.856061
	1.1101	1.06361	1.1751
	0.966667	1.13251	1.06559
	1.2049	1.29655	1.2235
	1.09981	1.35961	1.16855
	1.13181	1.083	1.09744
	0.940092	1.20476	1.29502
	0.981873	1.07796	1.18544
	0.963768	1.04768	1.14876
	1.07143	1.14312	1.14524
	1.13258	1.0034	1.13916
	1.14579	1.23976	1.12899
	1.03033	1.35244	1.13306
	1.39922	1.21429	1.04675
	1.21992	1.19699	1.14571
	1.31174	0.852941	1.02819
	1.0865	1.01992	1.2865
	1.09152	1.19409	1.10391
	1.27572	1.1597	0.989831
	1.16632	1.17572	1.16495
	1.2972	1.0265	1.08898
	1.05835	1.08264	1.24837
	1.21561	1.215	1.28772
	1.10303	1.10838	1.32784
	0.927711	1.07229	1.0812
	1.19383	0.960538	1.19241
	1.28713	1.08429	1.24922
	1.1762	1.25473	0.993174
	0.969194	1.15672	1.2
	1.13669	1.35638	1.14485
	1.20225	1.09652	1.14927
	1.1692	1.08496	1.11218
	1.37698	1.09244	1.02714
	1.07337	1.20167	1.08202
	1.06143	0.98419	1.21455
	1.0293	1.40602	1.22222
	1.27586	1.03337	1.10279
	1.19097	1.13656	1.05851
	1.01858	0.894988	1.03504
	1.0363	0.955056	1.16035
	1.20632	1.33838	1.03979
	1.07411	1.1782	1.10342
	1.02486	1.22261	1.30899
	1.27376	0.92827	1.248
	1.06514	1.1487	1.37374
	1.32	1.24756	1.11907
	1.16753	1.29108	1.20798
	1.31818	1.09838	1.39333
	1.12198	1.35044	1.16828
	1.29955	1.42291	1.25697
	1.01989	1.16797	1.12851
	1.17377	0.946708	1.18758
	0.974668	0.963801	1.09702
	1.1608	1.16543	1.07371
	1.20142	1.46063	1.11085
	1.13852	0.849265	1.3113
	1.20854	1.02458	1.05882
	1.05131	1.15077	1.11417
	1.09929	1.24596	1.17549
	1.21672	1.22605	1.15971
	1.13641	1.1565	1.15517
	1.23228	1.11146	1.09091
	1.28197	1.09585	1.17364
	1.14157	1.14229	1.33922
	1.16969	1.18182	1.19377
	1.28188	1.2027	0.991597
	1.15806	1.30531	1.1255
	1.31538	1.22	0.860636
	1.11935	1.11111	1.2809
	1.04167	1.06762	1.12964
	0.981417	1.16216	1.11238
	1.02987	1.12563	1.35517
	1.14945	1.09836	1.15546
	1.16433	1.19247	1.09913
	1.12698	1.26742	1.10312
	1.09156	1.04585	1.29084
	1.30978	1.07463	1.04636
	1.13897	1.04428	1.12147
	0.995516	1.12881	0.931953
	0.979339	1.14642	1.19218
	1.22047	1.06195	1.06977
	1.07116	1.19083	0.848329
	1.32946	1.29392	1.1218
	1.18609	1.2186	1.04073
	1.07823	1.22901	1.14717
	1.1575	1.14948	1.07712
	1.12289	1.20909	1.03929
	1.10724	1.21395	1.15862
	1.15458	1.0123	1.16022
	1.12847	1.08878	1.08322
	1.02652	1.10852	1.11399
	1.25915	1.04478	1.27473
	1.05789	1.01157	1.28028
	1.15233	1.11012	0.99297
	1.19853	1.10197	1.20048
	1.14205	1.22942	1.10409
	1.12084	1.00844	1.07995
	1.08137	1.0787	1.20217
	1.29056	1.3404	1.16108
	1.06069	1.18519	0.958702
	1.1206	1.18433	0.915084
	0.992901	1.08685	1.16908
	1.12273	1.03653	1.02738
	1.17692	1.25202	1.26044
	1.12538	1.13415	1.17234
	0.978648	1.21994	0.927215
	0.905815	1.40104	1.24815
	1.04184	1.04266	1.23611
	1.22311	1.16596	1.13014
	1.19399	1.17736	0.996134
	1.10394	1.08087	1.04795
	0.884259	1.27623	1.12788
	1.25083	1.02885	1.25322
	1.00322	1.08531	1.11111
	1.06033	1.07363	1.17659
	1.12876	1.18002	1.20388
	1.18038	1.11159	1.10761
	0.955975	1.18989	1.38514
	1.16575	1.05714	1.0289
	0.992806	1.00758	1.14735
	1.05841	1.00607	1.27925
	1.21983	1.16438	1.20296
	1.37313	1.21993	1.14614
	1.11411	1.26223	1.2191
	1.27676	1.13692	1.15904
	1.10475	1.27654	1.08673
	1.10108	1.08679	1.07095
	1.258	1.1314	1.02222
	1.1064	1.12101	1.11042
	1.03886	1.09449	1.23522
	1.11602	1.24444	1.17301
	0.992883	1.28073	1.01482
	1.03882	1.2178	1.19744
	1.05975	1.08791	1.32862
	1.09886	1.04937	1.17878
	1.2381	1.04575	1.16122
	1.10357	1.16552	1.06667
	1.18694	1.25658	1.23261
	1.01602	1.10791	1.12035
	1.00727	1.06182	1.17875
	1.11151	1.03497	1.05517
	1.06236	1.17213	1.08421
	1.15011	1.06024	1.14133
	1.06833	1.17219	1.13804
	1.31624	1.15356	1.04106
	1.15261	0.974667	1.33333
	1.20738	1.18049	1.04706
	1.06011	1.16079	1.11515
	1.11846	1.17665	1.0983
	1.11538	1.18707	1.12609
	1.14368	1.18953	1.31069
	0.993548	1.01455	1.30269
	1.17252	1.11588	1.08274
	1.07096	1.00649	1.38057
	1.0901	1.04382	1.19726
	1.05709	1.11799	1.11024
	1.0824	0.901961	1.10617
	1.29167	1.01182	1.09381
	1.3157	1.26923	1.34098
	1.04698	1.29418	1.13435
	1.26599	1.23214	1.22435
	1.00772	1.17174	0.995006
	1.0456	0.99239	0.910517
	1.04972	1.11309	1.09388
	1.03099	1.13389	1.16828
	1.11848	1.15285	1.00583
	1.17562	1.01148	1.19926
	1.22378	1.22673	1.08846
	1.30662	1.17961	1.17081
	1.09498	1.20559	1.06849
	1.03452	1.14721	1.20856
	1.15839	1.16234	1.02893
	1.23786	1.11694	1.27747
	1.38	1.00395	1.10233
	1.26927	1.10721	1.00351
	1.06316	1.00858	1.15844
	1.10897	1.00439	1.25641
	1.13886	1.21017	1.06918
	1.10437	1.4176	1.13919
	1.055	1.24441	1.2
	1.31989	1.09567	1.15755
	1.10699	1.12273	1.1265
	1.14441	1.17521	1.19245
	1.08947	1.13609	1.30435
	1.108	0.96729	1.23265
	1.00862	1.34519	1.06752
	1.03237	1.23629	0.951342
	1.16621	1.12515	1.07438
	1.21486	0.979592	1.02661
	1.2043	1.04242	1.24322
	1.12618	1.11638	1.09417
	1.21975	1.26982	1.0396
	1.25788	1.12857	1.19053
	1.07559	1.05607	1.17717
	1.16825	1.16292	0.968531
	0.980695	1.08969	1.21429
	1.2957	1.09281	1.47692
	1.16684	1.16905	1.23278
	1.13393	1.10646	1.05277
	1.1033	1.25357	1.07923
	1.17195	1.12185	1.21154
	1.07617	1.33333	1.16244
	1.05906	1.13668	1.10444
	1.01917	1.20389	1.19464
	1.13046	1.0231	1.13433
	1.12706	1.31519	1.05537
	0.981293	1.31579	1.33571
	1.11834	1.11481	1.13219
	1.09036	1.24771	1.0484
	1.2218	1.17302	0.997611
	1.27434	1.18791	1.09932
	1.0383	1.11448	1.20677
	1.21302	1.07317	1.0251
	1.11919	1.04783	1.11942
	0.920863	1.10836	1.18148
	1.05988	1.02162	1.08333
	1.11212	1.09505	1.12709
	1.17544	1.0626	1.13805
	1.08777	1.07226	1.22351
	1.18314	1.20769	1.05202
	1.07209	1.21789	1.18372
	1.00891	1.06076	1.22523
	1.04357	1.03093	1.09158
	1.29888	1.27966	1.24223
	1.1223	1.1172	1.22027
	1.138	1.16525	1.14554
	1.06135	1.12234	1.17123
	1.07226	0.947368	1.29846
	1.22129	1.19466	1.34196
	1.28767	1.01684	1.29654
	1.19273	1.24004	1.10565
	0.992453	1.08415	1.08227
	1.22088	1.07731	1.10619
	1.03022	1.14583	1.4292
	1.028	1.09281	1.27744
	1.37638	1.09349	0.822006
	1.03981	1.16733	1.08462
	1.21347	1.25316	0.959821
	1.02119	0.835443	1.12378
	1.00164	1.25275	0.996124
	1.04301	1.23654	1.18742
	1.08803	1.1074	1.05108
	1.20638	1.14938	1.1879
	0.992857	1.06314	1.09948
	1.1	1.11021	1.15058
	1.03254	1.08937	1.07905
	1.14544	1.1054	1.07656
	1.20761	1.21931	1.22481
	1.15635	1.2197	1.35231
	1.02724	1.43718	1.16914
	1.07185	1	1.26259
	1.13165	1.1658	1.13587
	1.1242	1.1987	1.13174
	1.19502	1.02846	1.07657
	1.06753	1.18994	1.13333
	1.10513	0.989247	1.03768
	0.902655	0.863415	1.24324
	0.861963	1.18721	1.23276
	1.20859	1.2	1.08306
	1.09009	1.24573	1.27508
	1.04634	1.20195	1.111
	1.15605	1.17835	1.3218
	1.33871	1.01878	1.41411
	1.08017	1.32031	1.13858
	1.08997	0.929624	1.02638
	0.970254	1.13133	1.2874
	1.12662	1.08061	1.24667

## Sheet: Figure5C_Nup133_PlusRan_NoKap
Name	Nup133_t0	Nup133_t60_plusRan	Nup133_t90_noKaps
Median	1.1611	1.15929	1.14417
First Quartile	1.07352	1.06229	1.05275
Third Quartile	1.23878	1.25777	1.23239
Data:	1.01903	1.27801	1.09766
	1.28782	1.13718	1.24505
	1.00968	1.25652	1.07761
	1.25	1.23478	1.10029
	1.16058	1.01754	1.28781
	1.21173	1.14671	1.23718
	1.07625	1.04049	1.0531
	1.20592	1.20331	1.15273
	1.22159	1.25455	1.03264
	1.16653	1.22124	1.06686
	1.27451	1.18893	1.23703
	1.46781	1.30527	1.144
	1.2349	1.33094	1.18018
	1.18593	1.20149	1.10224
	1.29865	1.0176	1.36017
	1.32458	1.50495	1.02244
	1.04418	1.06222	1.10215
	1.18506	1.0597	1.11224
	1.12162	1.1978	1.25413
	0.829352	0.909747	1.40591
	0.957576	1.29921	1.03896
	1.43561	1.22931	1.35247
	1.27717	1.14382	1.21843
	1.09135	1.03191	1.0433
	0.951189	0.847561	1.46245
	1.17083	1.35558	1.10676
	1.13343	1.08032	1.06634
	1.15169	1.30579	0.882353
	1.27542	1.30837	0.901754
	1.17832	1.14986	1.15903
	0.992278	1.35593	0.96319
	0.959805	0.972222	1.02299
	1.29744	0.914798	0.974545
	1.18937	1.188	1.2323
	1.2035	0.916364	1.36902
	1.0757	1.26036	0.987705
	0.807544	1.06061	1.00329
	1.11333	1.15677	1.05263
	1.22535	0.987952	1.06509
	0.972414	1.09274	1
	1.04858	1.15	1.16594
	1.1607	0.97992	1.25639
	1.18831	1.22358	1.16753
	1.36152	1.21505	1.11908
	1.22222	0.888579	1.03812
	1.18034	0.842482	1.23241
	1.33333	1.20976	0.893983
	1.16753	1.29206	1.01628
	1.15972	1.05058	1.21985
	0.996875	1.18227	1.25071
	1.42199	1.14995	1.21654
	1.14692	1.21951	0.973615
	1.18627	1.4281	1.14052
	1.15576	1.19678	1.10065
	1.1409	1.28861	1.28935
	1.22682	1.16495	1.10843
	1.00603	1.39975	1.22486
	0.978992	1.15724	1.12938
	1.35093	1.23323	1.22441
	1.17671	1.23902	1.02182
	1.3	0.963415	1.04612
	1.20588	0.964824	1.07164
	1.09325	1.07304	1.03291
	1.3289	1.23693	1.0848
	1.23089	1.12996	1.07718
	1.17857	1.03835	1.016
	1.21583	1.35679	1.1194
	1.12403	1.15045	1.28611
	1.23246	1.10861	0.864789
	1.11059	1.35817	1.20798
	1.31329	1.22788	1.23768
	1.02121	1.14007	1.25753
	0.990826	0.889734	1.30225
	1.18699	1.04255	1.27557
	1.25	1.0625	1.15493
	1.08368	1.08173	1.33693
	1.01678	0.83965	1.09339
	1.02033	1.44591	1.15488
	1.17436	1.25933	1.02746
	0.996622	1.29228	0.934426
	1.06321	1.31311	1.10244
	1.03519	0.937931	1.31186
	1.33876	1.02058	1.10443
	1.60284	1.36849	1.03203
	1.07753	0.995671	0.922667
	1.15878	0.94898	1.19841
	0.975197	1.10795	1.34502
	1.2512	1.15891	0.966887
	1.21264	1.03273	1.0609
	1.1443	1.1687	1.269
	1.25957	1.28331	1.05089
	1.34199	1.15468	0.856655
	0.978056	1.25819	1.07792
	1.10847	1.16425	1.05442
	1.20018	0.84	1.05859
	1.18629	1.02381	1.09572
	1.16887	1.14945	1.17813
	1.39098	1.22973	1.22158
	1.32861	1.32155	1.15773
	1.08333	1.10042	1.23013
	1.19825	1.10566	0.974286
	1.18712	1.29939	1.28413
	1.20495	1.07229	0.88764
	1.07163	1.05673	1.44537
	1.10128	1.27943	0.974265
	1.2437	0.92562	1.23417
	1.18325	1.35346	1.19485
	1.15412	1.09456	1.21285
	0.961538	1.16328	0.890675
	0.902834	1.06161	0.997101
	1.2686	1.16863	1.21038
	1.19118	1.456	1.21755
	0.918719	1.19529	0.9625
	1.15385	1.21719	1.16154
	1.16357	1.06883	1.1024
	0.967871	1.21267	1.17699
	1.03652	1.06881	1.14407
	1.01572	1.28571	1.07066
	1.05294	1.09278	1.18272
	1.08511	1.24407	1.17945
	1.06199	1.09129	0.926421
	1.05199	0.997361	1.33482
	0.990517	1.38049	1.06667
	1.27077	1.04615	1.39091
	0.996564	0.985714	1.03235
	1.25534	1.13071	1.30085
	1.19692	1.21845	1.08108
	1.00783	1.28591	1.33269
	0.99924	1.14079	1.15512
	1.31799	1.24645	1.27134
	1.38406	1.08054	1.04375
	1.30906	1.13393	1.30357
	1.11316	0.989247	1.22067
	0.992464	1.1327	1.22699
	1.16064	1.0597	1.14991
	1.21994	1.23961	1.10579
	1.14319	1.06854	1.29167
	1.12672	1.02451	1.23388
	1.08527	1.14626	1.16514
	0.961538	1.18575	1.30789
	1.07801	0.983806	1.14426
	1.1791	1.24123	1.21613
	1.20398	1.14815	1.23358
	1.2	0.958333	1.19147
	1.32269	0.934028	0.825083
	1.06272	1.16732	1.36923
	1.00398	1.37101	1.05526
	1.11828	1.01329	1.32019
	1.20067	1.35214	1.21658
	1.37669	1.04783	1.25
	0.834756	0.957265	1.26564
	1.25197	1.44845	1.05859
	1.08784	1.30254	1.21099
	1.23502	1.09668	1.05904
	0.987395	1.29278	1.21632
	1.21455	1.0873	1.11511
	1.17167	0.945255	1.18182
	1.16844	1.37491	1.02235
	1.20039	1.37736	0.911348
	1.18824	1.19461	1.10558
	1.52846	1.19643	1.20946
	1.11765	1.10849	1.24363
	1.28364	1.0975	0.919355
	1.06164	1.08897	1.16102
	0.841379	1.04531	1.46121
	1.14041	1.10861	1.25243
	1.13202	1.13043	0.991435
	1.28279	1.27477	1.12145
	1.17114	1.13295	1.07391
	1.20921	0.927322	1.08696
	1.00901	0.925081	1.06415
	1.26132	1.15948	1.12615
	0.996154	1.09756	0.98017
	1.29351	0.930041	1.12032
	1.05128	1.30172	1.31023
	1.35789	1.06069	0.971698
	1.21212	1.12679	1.2168
	1.29851	1.11397	1.2809
	1.21088	1.09426	0.937956
	1.22914	1.19318	1.19486
	1.22182	1.18443	1.28289
	1.25887	1.18814	1.24113
	1.40104	1.19231	1.14481
	1.23891	1.2748	1.38039
	0.971004	1.13071	0.962838
	1.09047	1.12371	1.20699
	1.08014	1.20647	1.08719
	1.22051	1.26816	1.11111
	1.3719	1.03679	1.12784
	0.802632	1.06283	1.07612
	1.17122	1.25551	1.04281
	1.47667	1.20915	1.21658
	1.17208	1.08333	1.33353
	1.18182	1.21627	1.20915
	1.16895	1.21865	1.27795
	1.27645	1.23843	1.27138
	1.37421	1.03861	1.16839
	1.16522	1.03211	1.29333
	1.14837	0.963636	1.20308
	1.26146	1.28164	1.25992
	1.6746	1.09071	1.27844
	1.28194	1.21244	1.15094
	1.00836	1.22741	1.20983
	0.953901	1.12709	1.12846
	1.05019	0.887255	1.22794
	1.05846	1.21818	1
	1.22536	1.03252	1.32027
	1.101	1.02622	1.14943
	1.31604	1.03211	1.05657
	1.34	1.2547	1.0844
	1.26667	0.963504	1.1751
	1.01166	1.29087	0.984694
	1.13027	1.58077	1.06271
	1.43071	1.36544	1.27234
	1.41473	1.27599	1.0236
	1.33457	0.869231	1.15125
	0.999194	1.07121	1
	1.11745	1.31281	1.18155
	1.23552	1.04805	0.988131
	1.11704	1.15909	1.17698
	1.18578	1.17676	1.10368
	1.01042	1.39086	1.11143
	1.14008	1.35537	1.30153
	1.2726	1.04851	0.976744
	1.35043	1.1269	1.07971
	1.07864	1.1938	1.34799
	1.15985	1.05753	1.17669
	1.3125	0.953988	1.096
	1.06977	1.20947	1.08428
	1.06624	1.39421	1.10425
	1.12548	1.03185	1.28838
	1.08459	1.30295	0.976834
	1.06452	1.19369	1.2287
	1.16151	1.2381	1.32672
	1.14237	1.39789	0.903571
	1.03195	1.19507	0.996753
	1.3738	1.39095	0.975936
	1.14689	1.26213	1.00651
	1.06932	1.06115	1.01786
	1.13043	0.950943	0.958101
	1.23009	1.27419	1.35791
	1.25172	1.16172	1.06093
	1.16012	1.08444	1.19495
	1.04396	1.18804	1.18328
	1.14837	1.30097	1.36992
	1.20151	1.10053	0.918301
	1.16556	1.18053	1.09949
	1.12	1.35818	1.21581
	1.0955	1.06818	1.04748
	0.915541	1.11745	1.08955
	1.31068	1.28	1.02466
	1.07633	1.36145	1.01742
	1.06739	1.09061	1.07786
	1.31612	1.11952	1.26165
	1.25116	1.09916	1.06061
	1.14806	1.13445	1.01253
	1.19128	1.23105	1.13651
	1.3189	0.816794	1.21387
	1.08631	1.11935	0.960432
	1.07432	1.28869	1.22212
	1.02252	1.08621	1.34537
	1.2915	1.33438	1.15438
	1.23276	1.36656	1.16552
	1.06019	1.22212	0.956522
	1.17021	1.42424	1.12033
	1.09879	1.3292	1.1157
	0.967509	1.25254	0.845109
	1.12562	1.04594	1.12715
	1.01014	1.20851	1.17143
	1.2093	1.31892	0.919732
	1.28485	1.28571	1.0925
	1.07326	1.26361	0.931464
	1.1195	1.34722	1.16533
	1.14249	1.14888	1.36031
	1.14679	1.18447	1.27037
	1.23839	1.17962	1.03012
	1.09151	1.22083	1.18444
	1.28689	1.33932	1.30505
	1.12975	1.26449	1.32443
	1.20792	1.09783	1.3967
	1.14417	1.16904	1.03761
	0.833333	0.9875	1.28295
	1.06534	0.981395	1.21708
	1.131	1.14468	1.19209
	0.96353	1.11111	1.27491
	1.12546	1.33077	1.2904
	0.966767	1.06883	1.23847
	1.25313	1.21314	1.10108
	1.05828	1.18939	1.20588
	1.08394	1.16583	0.974293
	1.36404	1.04104	1.16624
	1.11884	1.15847	1.06618
	1.0765	1.32252	1.12893
	1.11841	1.375	1.06494
	1.2272	1.08803	1.25307
	1.34694	0.817844	1.01645
	1.20082	1.31343	1.23284
	1.31362	1.22809	1.11765
	1.28752	1.04682	1.16971
	1.13376	1.19048	1.20866

## Sheet: Figure5D_Nup133_NoRan_PlusKap
Name	Nup133_t0	Nup133_t60_noRan	Nup133_t90_plusKaps
Median	1.16341	1.18377	1.18643
First Quartile	1.09101	1.12819	1.12309
Third Quartile	1.23294	1.24461	1.26098
Data:	1.25651	1.16402	1.21856
	1.25812	1.07393	1.13378
	1.21288	1.22924	1.12299
	1.07527	1.24949	1.02002
	1.09899	1.09958	1.27244
	1.32903	1.09281	1.11336
	1.28266	1.20235	1.27354
	1.17933	1.1396	1.17143
	1.17671	1.30011	1.36289
	0.986853	1.17138	1.1906
	1.08745	1.16618	1.06632
	1.05813	1.18854	1.11181
	1.04498	1.27523	1.41916
	1.10915	1.20364	1.21079
	1.17759	1.02436	1.17377
	1.41292	1.17282	1.20143
	1.09033	1.19014	1.26422
	1.31504	1.11553	1.12438
	1.14622	1.23077	1.15431
	1.14474	1.22016	1.17195
	1.1699	1.22846	1.26077
	0.987591	1.24409	1.29505
	1.20651	1.28017	1.27607
	1.11048	1.18051	1.26105
	1.02436	1.15773	1.13476
	1.23576	1.22177	1.28435
	1.1857	1.18434	1.39143
	1.20814	1.16555	1.27451
	1.23288	1.13801	1.21083
	1.06006	1.08423	1.21274
	1.17571	1.14673	1.17726
	1.07213	1.20625	1.2206
	1.17943	1.16424	1.16774
	1.19544	1.18304	1.27042
	1.02489	1.35046	1.01591
	1.16304	1.15914	1.17726
	1.20996	1.08049	1.15886
	1.08247	1.29002	1.18474
	1.39412	0.915179	1.08487
	1.25951	1.20437	1.14871
	1.11725	1.16508	1.12888
	1.1059	1.14563	1.18011
	1.35604	1.20288	1.2526
	1.12992	1.23051	1.18913
	1.04376	1.09872	1.1398
	1.09814	1.25969	1.23015
	1.12142	1.10291	1.1126
	1.14506	1.18884	0.958947
	1.02184	1.17934	1.11648
	0.923191	1.29973	1.27415
	1.3097	1.14947	1.23662
	1.07928	1.4147	1.1953
	1.12861	1.23614	1.09709
	1.09288	1.20453	1.20889
	1.2188	1.0543	1.34904
	1.35187	1.25179	1.07215
	1.30982	1.23971	1.21624
	1.30694	1.20807	1.18487
	1.22915	1.09552	1.10741
	1.25983	1.16289	0.948864
	1.17517	1.21892	1.11886
	1.05742	1.30095	1.2821
	1.23734	1.1671	1.10792
	1.04212	1.32009	1.28346
	0.990982	1.11227	1.25279
	1.21865	1.21461	1.10408
	0.977137	1.38245	1.17621
	1.12116	1.13561	1.46709
	1.31018	1.14146	1.15826
	1.21239	1.17989	1.09418
	1.09133	1.13678	1.20353
	1.125	1.28014	1.1683
	1.31172	1.18462	1.19444
	1.19548	1.08144	1.26547
	1.15854	1.18545	1.18683
	1.06212	0.997392	0.987755
	1.20161	1.10085	1.33501
	1.19034	1.20207	1.13274
	1.19718	1.27463	1
	1.29905	1.3124	1.31349
	0.940054	1.19675	1.19978
	1.06452	1.04439	1.28008
	1.09091	1.09927	1.13636
	1.32121	1.26194	1.20126
	1.17354	1.09634	1.41626
	1.28114	1.21145	1.11796
	1.11694	1.03692	1.13793
	1.43201	1.10717	1.07852
	1.21948	1.06457	1.14601
	0.993622	1.26121	1.18346
	1.0352	1.26831	1.29115
	1.00457	1.14607	1.2363
	1.26036	1.29071	1.08788
	1.30075	1.24612	1.03824
	1.18306	1.14783	1.09857
	1.10802	1.15574	1.04739
	1.16105	1.08696	1.04868
	1.09401	1.16077	1.15758
	1.27045	1.28632	1.28288
	1.3756	1.06721	1.24633
	1.2379	1.15426	1.21301
	1.31483	1.24464	1.17947
	1.16816	1.14611	1.28205
	1.17853	1.15087	1.30022
	1.09771	1.2502	1.29672
	1.25468	1.14623	1.39001
	1.17098	1.34687	1.26758
	1.09938	1.13567	1.28957
	1.07987	1.11034	1.33748
	1.12935	1.22615	1.18293
	1.09449	1.0942	1.27172
	1.17921	1.1334	1.17717
	1.28173	1.26299	1.25581
	1.07447	1.20059	1.27161
	1.16061	1.1072	1.01244
	0.884967	1.04689	1.50829
	1.16558	1.26758	1.14564
	1.25558	1.1854	1.2114
	1.14591	1.23932	1.34229
	0.970135	1.22438	1.32276
	1.04334	1.23996	1.27291
	0.930435	1.29148	1.2965
	1.10305	1.15524	1.03302
	1.27688	1.15284	1.01747
	1.09434	1.17938	1.23129
	1.12272	1.1532	1.16599
	1.13208	1.26977	1.36353
	1.1938	1.24767	1.22015
	1.30724	1.21721	1.18382
	1.23134	1.37018	1.19444
	1.08167	1.02803	1.19439
	1.16484	1.01519	1.02665
	1.20016	1.08447	1.11692
	0.975059	1.14181	1.33333
	1.14611	1.26546	1.40888
	1.25369	1.12776	1.04575
	1.15327	1.14513	1.11194
	0.913636	1.23232	1.25641
	1.2567	1.11586	1.13614
	1.10469	1.06105	1.20239
	1.15319	1.26475	1.13034
	1.17935	1.12891	1.10556
	1.37022	1.28662	1.2785
	1.13695	1.07034	1.07876
	0.817597	1.25294	1.08113
	1.06658	1.20468	1.1462
	1.16248	1.23747	1.2601
	1.08514	1.2416	1.1806
	1.2272	1.04914	1.11869
	1.01993	1.13203	0.999194
	1.22431	1.26706	1.09596
	1.12223	1.18913	1.21336
	1.14917	0.99504	1.06485
	1.10688	1.16406	0.945813
	1.2531	1.10532	1.21387
	1.17497	1.21132	1.05539
	1.07102	1.24446	1.05455
	1.23297	1.18603	1.18081
	1.06234	1.07926	1.04689
	1.2592	1.17742	1.2359
	1.12124	1.12795	1.17061
	1.23411	1.33333	1.21148
	1.22471	1.25313	1.1841
	1.15021	1.05541	1.33561
	1.07916	1.16971	1.16927
	1.04645	1.16461	1.18659
	1.28827	1.28464	0.957162
	1.13078	1.26017	1.10228
	1.36354	1.38099	0.89537
	1.12954	1.23021	1.24438
	1.10478	1.2886	1.18398
	1.01684	1.07377	1.23989
	1.03351	1.10754	1.08221
	1.228	1.40345	1.02329
	1.21965	1.31322	1.20019
	1.08407	1.17424	1.27596
	1.30467	1.21786	1.21466
	1.27182	1.09585	1.10373
	1.11246	1.20639	1.17328
	1.26068	1.2398	1.1416
	1.02531	1.36351	1.32517
	1.12691	1.24343	1.11301
	1.15234	1.14965	1.07911
	1.23574	1.32424	1.33035
	1.21979	1.11288	1.15806
	1.20177	1.16943	1.25356
	1.23333	1.32819	1.18509
	1.22803	1.19038	1.15657
	1.22359	1.06265	1.10265
	1.19384	1.02254	1.27354
	1.22345	1.30909	1.025
	1.35412	1.08988	1.16203
	1.06562	1.13354	1.22583
	1.00898	1.34007	1.26641
	1.3609	1.1832	1.08259
	1.16228	1.31007	1.1819
	1.06634	0.988439	1.20714
	1.19519	1.05862	1.20672
	1.38571	1.20557	1.0612
	1.35073	1.14572	1.19558
	1.08493	1.16296	1.02989
	1.34828	1.03048	1.15285
	1.24438	1.26257	1.18803
	1.11003	1.27114	1.097
	1.1056	1.1701	1.10554
	1.27514	1.08796	1.15302
	1.18	1.16367	1.18317
	1.25464	1.15111	1.16505
	1.13898	1.1718	1.3
	1.13406	1.21294	1.08824
	1.11171	1.16753	1.00669
	1.22286	1.03015	1.246
	1.06835	1.37805	1.25773
	1.065	1.11585	1.40379
	1.17619	1.19828	1.12742
	1.26566	1.00945	1.39061
	1.05153	1.23186	1.1957
	1.26126	1.084	1.28069
	1.00336	1.24196	1.18627
	1.30176	1.15091	1.13175
	1.18964	0.977085	1.16701
	1.18021	1.19831	1.07419
	1.20934	1.13622	1.2037
	1.15136	1.0252	1.13384
	1.11585	1.26486	0.917505
	1.36496	1.2112	1.13341
	1.29479	1.24623	1.31454
	1.26368	1.20412	1.2049
	1.58955	1.07768	1.20448
	1.05649	1.285	1.287
	1.18043	1.34778	1.16947
	1.11553	1.27083	1.139
	1.22242	1.16544	1.18479
	1.18401	1.11086	1.11249
	1.04648	1.16593	1.30159
	1.16298	1.29988	1.29341
	1.02148	1.13086	1.19705
	0.90779	1.23981	1.22954
	1.14809	1.18931	1.22375
	1.12094	1.13214	1.37165
	1.11407	1.02883	1.3511
	1.16379	1.16835	1.22109
	1.16745	1.20915	1.20523
	1.15772	1.18684	0.963912
	1.04089	1.12594	1.0668
	1.05317	1.19849	1.21887
	1.12767	1.18796	1.35569
	1.3966	1.0811	1.18174
	1.24146	1.18262	1.24596
	1.22285	1.15378	1.28112
	1.06327	1.0952	1.10032
	1.31471	1.22682	1.29487
	1.29038	1.1363	1.17571
	1.16204	1.22892	1.15745
	1.18657	1.20241	1.30529
	1.19626	1.24374	1.28508
	1.434	1.07184	1.31599
	1.14912	1.04296	1.24275
	1.1	1.11829	1.24441
	1.06865	1.16667	1.16858
	1.06773	1.03745	1.09791
	1.16857	1.19804	1.14301
	1.32653	1.11027	1.33373
	1.14428	1.23326	1.21144
	1.18341	1.31814	1.00298
	1.11719	1.06685	1.34192
	1.18725	1.21827	1.29697
	1.06962	1.20986	1.18512
	1.25557	1.39856	1.10901
	1.17316	1.29884	1.12338
	1.33361	1.06919	1.06814
	1.2311	1.23871	1.21683
	1.30268	1.13605	1.14137
	1.19194	1.24455	1.22823
	1.17676	1.17932	1.13654
	1.20282	1.38831	1.19217
	1.0877	1.26392	1.24853
	1.1382	1.1924	1.23196
	1.21595	1.17282	1.42889
	1.03794	1.29862	1.26768
	1.19903	1.28011	1.16049
	1.09161	1.09203	1.33154
	1.275	1.2396	1.1583
	1.15106	1.35534	1.26856
	1.15436	1.26535	1.17676
	1.06439	1.18142	0.983713
	1.19577	1.29754	1.27682
	1.10405	1.11241	1.21598
	1.00089	1.09822	1.19329
	1.32704	1.22112	1.23879
	1.06713	1.11344	1.231
	1.10667	1.29932	1.14314
	1.31191	1.2996	1.12684
	1.07779	1.33174	1.22714
	0.981378	1.36022	1.3518
	1.05613	1.3416	1.22914
	1.08398	1.29442	1.05806
	1.29403	1.17414	0.925872
	1.17368	1.16589	1.41193
	1.20455	1.17992	1.36917

## Sheet: Figure5E_Nup133_NoRan_NoKap
Name	Nup133_t0	Nup133_t60_noRan	Nup133_t90_noKaps
Median	1.16341	1.18377	1.18643
First Quartile	1.09101	1.12819	1.12309
Third Quartile	1.23294	1.24461	1.26098
Data:	1.25651	1.16402	1.21856
	1.25812	1.07393	1.13378
	1.21288	1.22924	1.12299
	1.07527	1.24949	1.02002
	1.09899	1.09958	1.27244
	1.32903	1.09281	1.11336
	1.28266	1.20235	1.27354
	1.17933	1.1396	1.17143
	1.17671	1.30011	1.36289
	0.986853	1.17138	1.1906
	1.08745	1.16618	1.06632
	1.05813	1.18854	1.11181
	1.04498	1.27523	1.41916
	1.10915	1.20364	1.21079
	1.17759	1.02436	1.17377
	1.41292	1.17282	1.20143
	1.09033	1.19014	1.26422
	1.31504	1.11553	1.12438
	1.14622	1.23077	1.15431
	1.14474	1.22016	1.17195
	1.1699	1.22846	1.26077
	0.987591	1.24409	1.29505
	1.20651	1.28017	1.27607
	1.11048	1.18051	1.26105
	1.02436	1.15773	1.13476
	1.23576	1.22177	1.28435
	1.1857	1.18434	1.39143
	1.20814	1.16555	1.27451
	1.23288	1.13801	1.21083
	1.06006	1.08423	1.21274
	1.17571	1.14673	1.17726
	1.07213	1.20625	1.2206
	1.17943	1.16424	1.16774
	1.19544	1.18304	1.27042
	1.02489	1.35046	1.01591
	1.16304	1.15914	1.17726
	1.20996	1.08049	1.15886
	1.08247	1.29002	1.18474
	1.39412	0.915179	1.08487
	1.25951	1.20437	1.14871
	1.11725	1.16508	1.12888
	1.1059	1.14563	1.18011
	1.35604	1.20288	1.2526
	1.12992	1.23051	1.18913
	1.04376	1.09872	1.1398
	1.09814	1.25969	1.23015
	1.12142	1.10291	1.1126
	1.14506	1.18884	0.958947
	1.02184	1.17934	1.11648
	0.923191	1.29973	1.27415
	1.3097	1.14947	1.23662
	1.07928	1.4147	1.1953
	1.12861	1.23614	1.09709
	1.09288	1.20453	1.20889
	1.2188	1.0543	1.34904
	1.35187	1.25179	1.07215
	1.30982	1.23971	1.21624
	1.30694	1.20807	1.18487
	1.22915	1.09552	1.10741
	1.25983	1.16289	0.948864
	1.17517	1.21892	1.11886
	1.05742	1.30095	1.2821
	1.23734	1.1671	1.10792
	1.04212	1.32009	1.28346
	0.990982	1.11227	1.25279
	1.21865	1.21461	1.10408
	0.977137	1.38245	1.17621
	1.12116	1.13561	1.46709
	1.31018	1.14146	1.15826
	1.21239	1.17989	1.09418
	1.09133	1.13678	1.20353
	1.125	1.28014	1.1683
	1.31172	1.18462	1.19444
	1.19548	1.08144	1.26547
	1.15854	1.18545	1.18683
	1.06212	0.997392	0.987755
	1.20161	1.10085	1.33501
	1.19034	1.20207	1.13274
	1.19718	1.27463	1
	1.29905	1.3124	1.31349
	0.940054	1.19675	1.19978
	1.06452	1.04439	1.28008
	1.09091	1.09927	1.13636
	1.32121	1.26194	1.20126
	1.17354	1.09634	1.41626
	1.28114	1.21145	1.11796
	1.11694	1.03692	1.13793
	1.43201	1.10717	1.07852
	1.21948	1.06457	1.14601
	0.993622	1.26121	1.18346
	1.0352	1.26831	1.29115
	1.00457	1.14607	1.2363
	1.26036	1.29071	1.08788
	1.30075	1.24612	1.03824
	1.18306	1.14783	1.09857
	1.10802	1.15574	1.04739
	1.16105	1.08696	1.04868
	1.09401	1.16077	1.15758
	1.27045	1.28632	1.28288
	1.3756	1.06721	1.24633
	1.2379	1.15426	1.21301
	1.31483	1.24464	1.17947
	1.16816	1.14611	1.28205
	1.17853	1.15087	1.30022
	1.09771	1.2502	1.29672
	1.25468	1.14623	1.39001
	1.17098	1.34687	1.26758
	1.09938	1.13567	1.28957
	1.07987	1.11034	1.33748
	1.12935	1.22615	1.18293
	1.09449	1.0942	1.27172
	1.17921	1.1334	1.17717
	1.28173	1.26299	1.25581
	1.07447	1.20059	1.27161
	1.16061	1.1072	1.01244
	0.884967	1.04689	1.50829
	1.16558	1.26758	1.14564
	1.25558	1.1854	1.2114
	1.14591	1.23932	1.34229
	0.970135	1.22438	1.32276
	1.04334	1.23996	1.27291
	0.930435	1.29148	1.2965
	1.10305	1.15524	1.03302
	1.27688	1.15284	1.01747
	1.09434	1.17938	1.23129
	1.12272	1.1532	1.16599
	1.13208	1.26977	1.36353
	1.1938	1.24767	1.22015
	1.30724	1.21721	1.18382
	1.23134	1.37018	1.19444
	1.08167	1.02803	1.19439
	1.16484	1.01519	1.02665
	1.20016	1.08447	1.11692
	0.975059	1.14181	1.33333
	1.14611	1.26546	1.40888
	1.25369	1.12776	1.04575
	1.15327	1.14513	1.11194
	0.913636	1.23232	1.25641
	1.2567	1.11586	1.13614
	1.10469	1.06105	1.20239
	1.15319	1.26475	1.13034
	1.17935	1.12891	1.10556
	1.37022	1.28662	1.2785
	1.13695	1.07034	1.07876
	0.817597	1.25294	1.08113
	1.06658	1.20468	1.1462
	1.16248	1.23747	1.2601
	1.08514	1.2416	1.1806
	1.2272	1.04914	1.11869
	1.01993	1.13203	0.999194
	1.22431	1.26706	1.09596
	1.12223	1.18913	1.21336
	1.14917	0.99504	1.06485
	1.10688	1.16406	0.945813
	1.2531	1.10532	1.21387
	1.17497	1.21132	1.05539
	1.07102	1.24446	1.05455
	1.23297	1.18603	1.18081
	1.06234	1.07926	1.04689
	1.2592	1.17742	1.2359
	1.12124	1.12795	1.17061
	1.23411	1.33333	1.21148
	1.22471	1.25313	1.1841
	1.15021	1.05541	1.33561
	1.07916	1.16971	1.16927
	1.04645	1.16461	1.18659
	1.28827	1.28464	0.957162
	1.13078	1.26017	1.10228
	1.36354	1.38099	0.89537
	1.12954	1.23021	1.24438
	1.10478	1.2886	1.18398
	1.01684	1.07377	1.23989
	1.03351	1.10754	1.08221
	1.228	1.40345	1.02329
	1.21965	1.31322	1.20019
	1.08407	1.17424	1.27596
	1.30467	1.21786	1.21466
	1.27182	1.09585	1.10373
	1.11246	1.20639	1.17328
	1.26068	1.2398	1.1416
	1.02531	1.36351	1.32517
	1.12691	1.24343	1.11301
	1.15234	1.14965	1.07911
	1.23574	1.32424	1.33035
	1.21979	1.11288	1.15806
	1.20177	1.16943	1.25356
	1.23333	1.32819	1.18509
	1.22803	1.19038	1.15657
	1.22359	1.06265	1.10265
	1.19384	1.02254	1.27354
	1.22345	1.30909	1.025
	1.35412	1.08988	1.16203
	1.06562	1.13354	1.22583
	1.00898	1.34007	1.26641
	1.3609	1.1832	1.08259
	1.16228	1.31007	1.1819
	1.06634	0.988439	1.20714
	1.19519	1.05862	1.20672
	1.38571	1.20557	1.0612
	1.35073	1.14572	1.19558
	1.08493	1.16296	1.02989
	1.34828	1.03048	1.15285
	1.24438	1.26257	1.18803
	1.11003	1.27114	1.097
	1.1056	1.1701	1.10554
	1.27514	1.08796	1.15302
	1.18	1.16367	1.18317
	1.25464	1.15111	1.16505
	1.13898	1.1718	1.3
	1.13406	1.21294	1.08824
	1.11171	1.16753	1.00669
	1.22286	1.03015	1.246
	1.06835	1.37805	1.25773
	1.065	1.11585	1.40379
	1.17619	1.19828	1.12742
	1.26566	1.00945	1.39061
	1.05153	1.23186	1.1957
	1.26126	1.084	1.28069
	1.00336	1.24196	1.18627
	1.30176	1.15091	1.13175
	1.18964	0.977085	1.16701
	1.18021	1.19831	1.07419
	1.20934	1.13622	1.2037
	1.15136	1.0252	1.13384
	1.11585	1.26486	0.917505
	1.36496	1.2112	1.13341
	1.29479	1.24623	1.31454
	1.26368	1.20412	1.2049
	1.58955	1.07768	1.20448
	1.05649	1.285	1.287
	1.18043	1.34778	1.16947
	1.11553	1.27083	1.139
	1.22242	1.16544	1.18479
	1.18401	1.11086	1.11249
	1.04648	1.16593	1.30159
	1.16298	1.29988	1.29341
	1.02148	1.13086	1.19705
	0.90779	1.23981	1.22954
	1.14809	1.18931	1.22375
	1.12094	1.13214	1.37165
	1.11407	1.02883	1.3511
	1.16379	1.16835	1.22109
	1.16745	1.20915	1.20523
	1.15772	1.18684	0.963912
	1.04089	1.12594	1.0668
	1.05317	1.19849	1.21887
	1.12767	1.18796	1.35569
	1.3966	1.0811	1.18174
	1.24146	1.18262	1.24596
	1.22285	1.15378	1.28112
	1.06327	1.0952	1.10032
	1.31471	1.22682	1.29487
	1.29038	1.1363	1.17571
	1.16204	1.22892	1.15745
	1.18657	1.20241	1.30529
	1.19626	1.24374	1.28508
	1.434	1.07184	1.31599
	1.14912	1.04296	1.24275
	1.1	1.11829	1.24441
	1.06865	1.16667	1.16858
	1.06773	1.03745	1.09791
	1.16857	1.19804	1.14301
	1.32653	1.11027	1.33373
	1.14428	1.23326	1.21144
	1.18341	1.31814	1.00298
	1.11719	1.06685	1.34192
	1.18725	1.21827	1.29697
	1.06962	1.20986	1.18512
	1.25557	1.39856	1.10901
	1.17316	1.29884	1.12338
	1.33361	1.06919	1.06814
	1.2311	1.23871	1.21683
	1.30268	1.13605	1.14137
	1.19194	1.24455	1.22823
	1.17676	1.17932	1.13654
	1.20282	1.38831	1.19217
	1.0877	1.26392	1.24853
	1.1382	1.1924	1.23196
	1.21595	1.17282	1.42889
	1.03794	1.29862	1.26768
	1.19903	1.28011	1.16049
	1.09161	1.09203	1.33154
	1.275	1.2396	1.1583
	1.15106	1.35534	1.26856
	1.15436	1.26535	1.17676
	1.06439	1.18142	0.983713
	1.19577	1.29754	1.27682
	1.10405	1.11241	1.21598
	1.00089	1.09822	1.19329
	1.32704	1.22112	1.23879
	1.06713	1.11344	1.231
	1.10667	1.29932	1.14314
	1.31191	1.2996	1.12684
	1.07779	1.33174	1.22714
	0.981378	1.36022	1.3518
	1.05613	1.3416	1.22914
	1.08398	1.29442	1.05806
	1.29403	1.17414	0.925872
	1.17368	1.16589	1.41193
	1.20455	1.17992	1.36917

## Sheet: Figure5F_Nup54_PlusRan_PlusKap
Name	Nup54_t0	Nup54_t60_plusRan	Nup54_t90_plusKaps
Median	0.723469	0.864116	0.843145
First Quartile	0.669588	0.800274	0.764971
Third Quartile	0.799541	0.940667	0.903096
Data:	0.792254	0.867021	0.764211
	0.697057	0.777528	1.03414
	0.588235	0.971576	0.785714
	0.748597	0.869732	0.861224
	0.574847	0.888158	0.849785
	0.624156	0.795005	0.949495
	0.760148	0.961905	0.887368
	0.737991	0.804979	0.903814
	0.700758	0.95122	0.938089
	0.93787	0.845771	0.864573
	0.711066	0.652	0.949239
	0.687225	0.834625	0.778947
	0.835991	0.580645	1.21857
	0.696343	0.769321	0.856808
	0.992547	0.958824	0.720739
	0.783333	0.754902	0.936242
	0.717949	0.807215	0.748062
	0.800654	0.862434	0.913907
	0.689243	0.795455	0.738636
	0.639956	0.771429	0.823529
	0.703601	1.05437	0.889896
	0.611987	0.895522	0.808858
	0.661673	0.927711	0.998915
	0.733624	0.781481	0.894108
	0.662977	0.863946	0.904523
	0.776366	0.722222	0.713386
	0.928994	0.995247	1.00294
	0.608	0.823821	0.866412
	0.737024	0.826877	0.804762
	0.722727	0.806763	0.721311
	0.760965	1.01863	0.706081
	0.870845	0.762264	1.02198
	0.654632	0.92053	1.02153
	0.709022	0.792383	0.782857
	0.778986	0.913333	1.02142
	0.697974	0.849791	0.85567
	0.698092	0.868056	0.904851
	0.811282	0.931217	0.759358
	0.702703	0.826667	0.872642
	0.807286	0.93617	0.864641
	0.594502	0.951906	0.721467
	0.838384	0.903867	0.843358
	0.701053	0.735714	0.917133
	0.791222	0.829412	0.737864
	0.617544	0.735115	0.874317
	0.680328	0.977273	0.850622
	0.782328	0.939042	0.9
	0.797403	0.826531	0.821366
	0.667954	0.791284	0.79397
	0.8	0.806349	0.733824
	0.753968	0.825967	0.70155
	0.673325	0.777778	0.75
	0.619718	0.784878	0.908676
	0.700876	0.808955	0.959641
	0.635321	0.652381	0.830375
	0.864253	1.0075	0.844291
	0.901099	1.0332	0.886842
	0.765854	0.912664	0.890093
	0.766287	0.961538	0.78169
	0.785642	0.676596	0.83905
	0.791045	0.819572	0.740088
	0.800937	0.763077	0.781006
	0.772267	0.992857	1.03744
	0.621087	0.98533	0.903581
	0.691283	0.823129	0.985861
	0.654373	0.683314	0.808824
	0.582759	0.972763	0.827174
	0.681102	1.07018	0.960976
	0.812865	0.892013	0.829684
	0.993955	1.11321	0.838194
	0.732663	1.05025	0.772222
	0.684119	0.752119	0.761364
	0.655405	0.919847	0.841202
	0.793304	0.928471	0.790984
	0.859944	1.05682	0.775862
	0.965873	1.14667	0.746667
	0.610419	0.614754	0.809104
	0.549828	0.723183	1.04444
	0.732523	0.678815	0.939394
	0.651877	0.959866	0.810493
	0.70018	0.689815	0.88
	0.67551	0.989583	0.755
	0.694853	0.821138	0.909639
	0.83268	0.727969	0.864572
	0.702614	0.884831	0.742616
	0.66934	0.663379	0.864629
	0.82221	0.908184	1.16109
	0.818489	0.881497	0.879518
	0.738889	0.849498	0.766831
	0.714667	0.646465	0.869347
	0.656934	0.916399	0.786885
	0.724211	0.874657	0.744292
	0.732899	0.896667	0.840183
	0.724313	0.857314	0.756098
	0.706271	0.738277	0.686217
	0.720307	0.83164	0.766537
	0.768473	0.851528	0.778393
	0.737064	0.719665	0.693548
	0.703125	0.795053	0.836858
	0.620087	0.842105	0.857143
	0.86121	0.938679	1.04471
	1.12974	0.870629	0.745575
	0.658635	0.914826	0.859504
	0.676329	0.740426	0.679654
	0.694087	0.885757	0.705263
	0.812172	0.867749	0.887307
	0.751142	1.00498	0.788235
	0.611446	0.8375	0.823741
	0.860835	0.859155	0.790244
	1.03743	0.931395	0.726933
	0.628538	0.911504	0.745704
	0.780316	0.935484	0.958159
	0.702479	0.938859	0.766999
	0.688807	0.873016	0.725082
	0.668823	1.02734	0.963801
	0.626984	0.851781	0.968889
	0.701566	0.771684	0.864785
	0.77416	0.81791	0.922139
	0.774008	0.989796	0.76776
	0.810256	0.869688	0.916329
	0.783019	0.814136	1.04693
	0.625438	0.813996	0.803922
	0.671516	0.79562	0.682927
	0.705882	0.72919	0.801099
	0.772217	0.893162	0.952096
	0.849673	0.890351	1.00507
	0.671717	1.08685	0.722222
	0.554054	0.971631	0.871287
	0.658922	0.793478	0.816901
	0.665217	0.945498	0.862275
	0.702929	0.913858	0.731102
	0.722279	1.0184	0.780854
	0.671982	0.853403	0.824219
	0.96063	1.00704	0.719723
	0.800781	0.766129	0.817451
	0.945652	0.987854	0.818376
	0.625919	0.893764	0.994118
	0.639785	0.817938	0.751174
	0.704319	0.891837	0.83945
	0.769025	0.808858	0.859355
	0.802018	1.13578	0.923077
	0.628837	0.983333	0.89497
	0.716921	1.02008	0.734807
	0.549242	0.731788	0.862069
	0.630982	1.0045	0.633238
	0.735248	0.765432	0.754762
	0.853982	0.942574	0.909091
	0.668097	0.812155	0.759369
	0.789189	1.08595	0.901639
	0.654135	0.796875	1.12593
	0.895317	1.03311	1.23887
	0.661504	0.878606	0.872642
	0.69967	0.717054	0.91195
	0.652393	0.854227	0.789227
	0.556777	0.951466	0.874317
	0.614545	0.812227	0.945665
	0.619926	0.734007	0.904279
	0.75122	0.87218	0.888889
	0.896861	0.828452	0.750509
	0.726852	0.848168	0.700787
	0.932246	1.02339	1
	0.784223	0.876559	0.846034
	0.849169	0.941989	0.641221
	0.757426	1.09975	0.637681
	0.825336	0.906011	0.783926
	1.15417	0.943503	0.897993
	0.676724	0.814189	1.10811
	0.88366	0.825336	0.65445
	0.699387	0.748503	0.8331
	0.654762	1.0226	0.70607
	0.586081	0.815789	0.86236
	0.784615	0.910112	0.872562
	1.06592	0.898148	0.760148
	0.765854	0.783654	0.926136
	0.76127	0.848101	0.826029
	0.654206	1.05789	0.886612
	0.728484	0.933135	0.951638
	0.793578	0.79375	0.856684
	0.875342	0.848366	0.87005
	0.668942	0.9375	0.923944
	0.615652	0.816594	0.848642
	0.683168	0.85	0.926101
	0.755541	0.942857	0.801075
	0.696939	0.923295	0.620321
	0.825503	0.872549	0.704797
	0.816605	0.820276	0.805991
	0.84058	0.9447	0.876377
	0.685594	0.85782	0.733333
	0.668633	0.761538	0.612676
	0.68984	0.871287	0.867925
	0.798165	0.815385	0.848598
	0.67866	0.892157	1.09735
	0.814006	0.952381	0.78125
	0.802983	0.942799	0.844156
	0.57197	0.939024	0.727273
	0.852941	0.812245	0.897143
	0.822052	0.976238	0.757489
	0.711392	0.974074	0.973369
	0.732283	0.770833	0.753459
	0.694416	0.752235	0.728358
	0.739059	0.990805	1.10041
	0.84	0.825336	0.737041
	0.951445	0.716129	0.715447
	0.629858	0.941704	0.855721
	0.673484	0.765579	0.933479
	0.763265	0.867925	0.849515
	0.808081	0.882812	0.775194
	0.909561	1.04834	0.808147
	1.06126	0.732632	0.676991
	0.888471	0.816121	0.808511
	0.594354	1.06704	0.807506
	0.931973	0.819499	0.754057
	0.589286	0.823881	0.809524
	0.827465	0.778788	0.864596
	0.67033	0.770161	0.698079
	0.743671	0.915888	0.871227
	0.597187	0.857143	0.764331
	0.856	0.891566	1.04613
	0.743363	0.823529	0.695035
	0.788136	0.781893	0.788079
	0.718075	0.92623	0.72428
	0.625714	0.781582	0.833643
	0.580233	1.13725	0.905501
	0.638009	0.819495	0.88
	0.603325	0.83651	0.958571
	0.609023	0.744332	0.713598
	0.580645	0.822398	0.896552
	1.03738	1.11538	1.03283
	0.740066	0.777273	1.0546
	0.741961	0.928571	0.849138
	0.705085	0.643602	0.778325
	0.696078	0.783951	0.833977
	1.29604	0.823256	0.802131
	0.638365	0.898901	0.977151
	0.864023	0.967532	0.708333
	0.784124	0.901333	0.651376
	0.683246	0.709677	0.91274
	0.813043	0.859396	0.834829
	0.676819	0.86875	0.853333
	0.681006	0.860563	0.77459
	0.834606	0.855738	0.625641
	0.73703	0.847545	0.899687
	0.856974	0.754717	1.06
	0.728882	0.864286	0.8736
	0.758772	0.895613	0.871111
	0.657749	0.940086	0.919847
	0.709766	0.774554	0.97549
	0.62766	0.82102	0.764706
	0.653805	0.930423	0.851809
	0.705562	0.744292	0.825284
	0.724551	0.871595	0.949833
	0.678112	0.74966	0.94084
	0.721694	1.02	0.623616
	0.766892	1.09336	1.10107
	0.812287	1.20446	0.756937
	0.783394	0.974406	0.997917
	0.640407	0.827839	0.748529
	0.917874	0.78841	0.767568
	0.75396	1.01747	0.635514
	0.705394	1.04094	0.762887
	0.528926	0.88024	0.785143
	0.587711	0.814379	0.703704
	0.740024	0.776978	0.899083
	0.985437	0.802752	0.895105
	0.690265	0.827119	0.702564
	0.675676	0.98773	0.823907
	0.85567	0.88412	0.88041
	0.913706	0.79927	0.942904
	0.720472	0.808266	0.874809
	0.710345	0.799448	0.845938
	0.69378	0.723512	0.894253
	0.702265	1.03562	0.791277
	0.810924	0.91221	1.00858
	0.616732	0.970803	0.831437
	0.726012	0.969466	0.986945
	0.766773	0.873494	0.848708
	0.689737	0.795673	0.65614
	1.14744	0.819338	0.630872
	0.715953	0.808324	0.787321
	0.738614	0.92283	0.838428
	0.761347	1.09841	0.884089
	0.824057	0.870056	0.966224
	0.644788	1.02717	0.771574
	0.652679	0.742739	0.815217
	0.73822	0.930748	0.811744
	0.761381	1.04348	0.765766
	0.619048	0.96831	0.846473
	0.852273	0.857143	0.860492
	0.581712	0.82875	0.812827
	1.03582	0.874624	1.02073
	0.767836	0.837438	0.842932
	0.72561	0.649351	0.715084
	0.775401	0.78649	0.885113
	0.673004	0.905125	0.927431
	0.818182	0.931983	0.896641
	0.693548	0.952575	0.838867
	0.77601	0.687264	0.891892
	0.620087	0.94086	1.00474
	0.855683	0.845328	0.882353
	0.670659	1.19052	0.92674

## Sheet: Figure5G_Nup54_PlusRan_NoKap
Name	Nup54_t0	Nup54_t60_plusRan	Nup54_t90_noKaps
Median	0.718692	0.845267	0.83326
First Quartile	0.666105	0.778345	0.766062
Third Quartile	0.772423	0.912958	0.910602
Data:	0.707453	0.823417	0.789714
	0.745161	0.811715	0.783394
	0.665581	0.953596	0.786638
	0.676157	0.804067	0.768631
	0.67613	0.881188	1.20654
	0.797863	0.663602	0.789229
	0.80807	0.648233	0.798354
	0.608108	1.23837	0.884321
	0.746377	0.88242	0.735602
	0.743243	0.825383	0.809717
	0.934426	0.841333	0.821586
	0.766082	0.770424	0.660348
	0.721739	0.718428	0.717042
	0.718665	0.673051	0.74221
	0.715128	0.664139	0.829978
	0.909091	0.7407	0.982199
	0.726737	0.841176	0.94522
	0.745779	0.937931	1.0223
	0.663357	0.802747	0.718543
	0.693617	0.817172	0.792056
	0.601313	0.73008	0.877512
	0.78972	0.870392	0.805675
	0.649194	0.948795	0.743863
	0.620087	0.863214	0.760832
	0.676806	0.776942	0.98506
	0.845833	0.751938	1.07652
	0.760976	0.905941	0.79779
	0.804878	0.917222	0.645695
	0.693407	0.828794	0.885459
	0.712803	0.766816	1.0087
	0.669145	0.970115	0.81631
	0.494048	0.611797	0.977213
	0.653996	0.975	0.713311
	0.705314	0.792895	0.747041
	0.759295	0.753444	1.05163
	0.7421	0.808118	0.915718
	0.830059	0.645724	0.827206
	0.654275	0.784091	0.87251
	0.59375	0.721796	0.921893
	0.63301	0.853414	0.910734
	0.608856	0.929487	0.899485
	0.81592	0.685103	0.778223
	0.716263	0.794872	0.761374
	0.63154	0.872107	0.764012
	0.557789	0.703911	0.727636
	0.655319	0.825269	0.828042
	0.665605	0.821667	0.896694
	0.681091	0.873016	0.891859
	0.764649	0.990175	0.981449
	1.02844	0.815862	0.834711
	0.623318	0.871429	0.833333
	1.00935	0.765472	0.86014
	0.803347	0.77667	0.821149
	0.746398	0.729333	0.854793
	0.552381	0.693252	0.971864
	0.732275	0.747614	0.808556
	0.62206	0.803253	0.722045
	0.936219	0.756219	0.732591
	0.673913	0.830508	0.955926
	0.658654	0.843902	0.770983
	0.712477	0.77381	0.760373
	0.738494	0.767055	0.936877
	0.667735	0.837545	0.863338
	0.777664	0.727273	0.80622
	0.760766	0.842209	0.819923
	0.783951	0.755848	0.784777
	0.630063	0.793893	0.940653
	0.690381	0.764092	0.910204
	0.697872	0.954942	0.838783
	0.718719	0.825509	0.692112
	0.746544	0.968296	0.700119
	0.7173	0.84	0.759298
	0.83181	0.863095	0.774633
	0.60186	0.732636	0.960784
	0.646951	1.12366	0.781116
	0.850909	0.958412	1.06206
	0.630081	1.17949	0.888462
	0.612167	0.825967	0.80839
	0.722772	0.790173	0.925965
	0.572792	1.10263	0.783447
	0.903673	0.831431	0.710908
	0.664557	0.778226	0.897864
	0.683993	0.829762	0.769531
	0.650977	0.91548	0.951111
	0.633874	0.923651	0.74223
	0.682598	0.847291	1.17568
	0.965772	0.891429	0.73908
	0.725753	0.660682	0.783875
	0.645522	0.876404	0.67079
	0.654008	0.764056	0.930678
	0.715415	0.921659	0.925651
	0.595041	0.785	0.866167
	0.712632	0.830508	0.877838
	0.724891	0.967742	0.822967
	0.667603	0.868762	0.863825
	0.654506	0.795775	0.899587
	0.67466	0.849624	0.93198
	0.616152	0.84901	0.938596
	0.72212	1.01695	0.926988
	0.617886	0.751693	0.764706
	0.605634	0.88169	0.80303
	0.54553	0.873171	0.845083
	0.669039	0.946602	0.665323
	0.750673	0.813039	0.749296
	0.696721	0.830986	0.921509
	0.760043	0.923165	0.728938
	0.69802	0.771947	1.00667
	0.870253	0.998828	0.853958
	0.742671	0.988506	0.836
	0.74433	0.898465	0.770992
	0.647505	0.737401	0.652174
	0.763133	0.881956	0.855866
	0.760163	0.885167	0.860627
	0.62533	0.817204	0.718861
	0.665433	0.878822	0.72322
	0.668856	0.823362	0.878641
	0.644828	0.92887	0.731395
	0.605735	0.881279	0.850129
	0.696525	0.84273	0.740214
	0.686368	0.822951	0.829457
	0.764097	0.837563	0.782991
	0.669285	0.850068	0.750779
	0.796396	1.0675	0.886818
	1.27073	0.762663	0.843699
	0.669291	0.94653	0.712707
	0.658921	0.885714	0.856331
	0.721239	0.833333	0.81155
	0.803708	0.892176	0.766055
	0.73301	1.00372	0.764986
	0.72384	0.770609	0.833187
	0.73743	0.685535	0.860262
	0.691099	0.772	0.938515
	0.890749	0.851485	0.848427
	0.824607	0.834008	0.887654
	0.674208	0.733586	0.981685
	0.757974	0.97561	0.860294
	0.695652	0.784173	0.795687
	0.858824	0.887677	0.751807
	0.659636	0.863442	0.766756
	0.604959	0.876349	0.785134
	0.832536	0.946375	1.00613
	0.67632	0.846572	0.957983
	0.675701	0.740741	0.665584
	0.945866	1.00549	0.714286
	0.742593	0.896296	0.979424
	0.584656	0.614786	0.81664
	0.737395	0.677049	0.842742
	0.641667	0.954244	0.739984
	0.763393	0.714141	0.811245
	0.720447	0.808696	0.932127
	0.866248	0.741071	0.817866
	0.593278	0.934319	0.814053
	0.676806	1.03254	0.67561
	0.838914	0.973799	0.764706
	0.866029	0.996466	0.823735
	0.977477	0.969957	0.905576
	0.823308	0.801386	1.00906
	0.814815	0.744318	0.822581
	0.737074	0.798932	0.804518
	0.764826	0.846626	0.82586
	0.75	0.953488	0.913861
	0.798419	0.900411	0.878301
	0.683348	0.890805	0.711085
	0.731807	0.824045	0.628866
	0.842975	1.00714	0.85101
	0.649505	0.882189	0.75
	0.755459	0.738854	0.804196
	0.639184	0.726848	1.0053
	0.78635	0.863702	0.879381
	0.809302	0.890157	0.771673
	0.594	0.815369	0.961672
	0.684302	0.847716	0.942288
	0.887017	0.754413	0.778169
	0.686291	0.97754	0.893986
	0.72973	0.804249	0.776138
	0.793167	0.793344	0.839433
	0.695562	0.889078	0.799296
	0.734634	0.711628	1.37695
	0.571429	0.951911	0.982667
	0.82519	0.754286	0.974545
	0.587971	1.01362	0.915751
	0.891304	0.846995	0.852535
	0.694311	0.828882	0.790049
	0.657588	1.01098	0.891026
	0.744186	0.876054	0.73842
	0.679104	0.713826	0.969206
	0.698413	0.802326	0.75268
	0.699074	0.847059	0.97604
	0.716418	1.13683	0.912014
	0.760976	0.721154	0.874332
	0.871067	0.981073	0.928796
	0.709793	0.912908	0.747872
	0.702108	0.919679	0.781465
	0.724771	0.888379	0.908397
	0.632911	0.844784	0.742832
	0.777033	1.16442	0.966667
	0.688889	0.780556	0.862726
	0.700088	0.909465	0.779874
	0.73301	0.87435	0.950178
	0.687217	0.921922	0.703072
	0.761194	0.824601	0.819516
	0.710472	0.967914	0.821206
	0.675439	0.909091	0.852094
	0.753052	0.758703	0.747525
	0.768595	0.941176	0.806604
	0.647568	0.790226	0.836386
	0.717838	0.77988	0.96789
	0.723881	0.788889	0.85034
	0.819516	0.87931	0.881137
	0.793269	1	0.863065
	0.714286	0.822384	0.784314
	0.760148	0.91941	0.685315
	0.681818	0.885141	0.923077
	0.66	0.760274	0.842937
	0.76581	0.825352	1.06615
	0.679012	0.955679	0.70522
	0.726316	0.681818	0.969979
	0.76246	0.861635	0.797654
	0.787523	0.84575	0.725806
	0.684211	0.871827	0.636719
	0.646445	0.925097	0.86
	0.690257	0.68599	0.851852
	0.726373	0.869822	0.904545
	0.909091	0.778704	0.895062
	0.678218	0.827699	0.900817
	0.728423	0.801498	0.77665
	0.655039	0.652361	1.18154
	0.778675	0.844255	1
	0.814721	0.846611	0.878864
	0.613793	0.846421	0.890511
	0.568841	0.780347	1.22425
	0.799242	0.669632	0.796992
	0.726684	0.794078	0.712538
	0.814286	0.971719	0.952305
	1.02188	0.873769	0.802768
	0.729391	1.12635	0.641129
	0.773109	0.939638	0.779824
	0.605166	0.867752	0.77641
	0.726562	0.779592	0.844734
	0.813456	0.706186	0.826511
	0.806569	0.741337	0.686007
	0.698113	0.743191	0.950495
	0.591549	1	0.762987
	0.654704	0.803419	0.916364
	0.587234	0.780488	0.960938
	0.785088	1.02646	0.760383
	0.616785	0.932933	0.795756
	0.8	0.912688	0.900789
	0.781278	1.10927	0.899787
	0.738182	0.811056	0.803191
	0.587622	0.879747	1.11351
	0.895954	1.06056	0.7475
	0.617225	0.912975	0.85939
	0.846701	0.861111	0.747346
	0.732328	0.949367	0.774264
	0.770363	0.943443	0.943478
	0.886053	0.733442	0.856204
	0.716192	1.13986	0.891738
	0.781631	0.777778	0.758406
	0.754872	0.896321	0.754438
	0.795156	0.96637	0.853571
	0.802326	0.864989	0.756654
	0.722071	0.870722	0.820122
	0.699902	0.880107	0.787252
	0.682258	0.758621	0.840785
	0.939513	0.981241	0.660336
	0.662791	0.893232	0.844291
	0.652688	0.795	1.08691
	0.558956	0.732955	0.919952
	0.762097	0.941847	0.913143
	0.663717	0.882129	0.802222
	0.690236	0.951253	0.756757
	0.810435	0.791165	0.705686
	0.833333	0.860125	0.895861
	0.701681	0.809945	0.957117
	0.733954	0.828571	0.833333
	0.774089	1.1	0.800179
	0.920136	0.703975	0.912043
	0.883838	0.76494	0.919614
	0.695785	0.865613	0.881745
	0.687097	1.19461	0.864242
	0.728938	0.736735	0.766082
	0.899901	1.04494	0.737017
	0.860265	0.819762	0.878496
	0.65067	0.668971	0.961054
	0.759615	0.843496	0.710018
	0.63354	0.771028	0.955005
	0.742229	0.709568	0.61811
	0.939571	0.885307	0.743194
	0.714135	0.851434	0.950646
	0.715184	0.875543	0.895616
	0.72551	0.841346	0.748521
	0.718519	0.850461	1.11794
	0.687961	0.75632	0.749726
	0.745174	0.971138	0.969112
	0.755656	0.734634	0.747541
	0.783961	0.887555	0.800995
	0.696942	0.773006	0.90878
	0.76	0.865724	1.07343
	0.634216	0.988062	0.81791

## Sheet: Figure5H_Nup54_NoRan_PlusKap
Name	Nup54_t0	Nup54_t60_noRan	Nup54_t90_plusKaps
Median	0.72648	0.734104	0.795238
First Quartile	0.682624	0.682455	0.73766
Third Quartile	0.786576	0.791706	0.858445
Data:	0.99269	0.666295	0.687853
	0.740741	0.67344	0.917214
	0.783198	0.707379	0.773333
	0.782383	0.925714	0.699865
	0.972669	0.741558	0.752699
	0.687646	0.89876	0.89881
	0.591353	0.671217	0.702487
	0.848308	0.81761	0.825
	0.722965	0.835325	0.712737
	0.735513	0.618541	0.919431
	1.03571	0.706865	0.821042
	0.63263	0.617729	0.894937
	1.12226	0.755656	0.86924
	0.647541	0.730496	0.915704
	0.762315	0.573871	0.789651
	0.716684	0.674393	0.877323
	0.767666	0.718169	0.906219
	1.11214	0.707711	0.854662
	0.870229	0.676964	0.781888
	0.866837	0.734722	0.652561
	0.68873	0.747449	0.679181
	0.665446	0.760776	0.783784
	0.888325	0.627273	0.795604
	0.718464	0.923328	0.838748
	0.767733	0.710988	0.887268
	0.668097	1.01473	0.752144
	0.879022	0.70706	0.807152
	0.837209	0.833165	0.747559
	0.794012	0.80033	0.762092
	0.732422	0.75731	1.21662
	1.20457	0.714681	0.768371
	0.759162	0.766734	0.916865
	0.768349	0.846241	0.656891
	0.786546	0.816901	0.802885
	0.881203	0.827618	0.720177
	0.684335	0.875817	0.892704
	0.813067	0.774302	0.898345
	0.844324	0.72137	0.659781
	0.685246	0.726263	0.857143
	0.630614	0.768844	0.60666
	0.772606	0.70241	0.841699
	0.718331	0.829152	0.733758
	0.805687	0.701681	0.751921
	0.670123	0.734355	0.763505
	0.664286	0.643162	0.766234
	0.635359	0.808276	0.882507
	0.771072	0.64538	1.00966
	0.711648	0.642029	0.81864
	0.70303	0.677588	0.904055
	0.718954	0.723346	0.865707
	0.689252	0.774671	0.768092
	0.634543	0.739186	1.53863
	0.641427	0.731233	0.777328
	0.731241	0.778215	0.733427
	0.715144	0.7223	0.836032
	0.819101	0.682243	0.770256
	0.786585	0.846094	0.822917
	0.710078	0.723545	0.907433
	0.794041	0.85521	0.688917
	0.706931	0.690387	0.741972
	0.730594	0.659873	0.888889
	0.781734	0.625147	0.805556
	0.722291	0.708841	0.859083
	0.771505	0.600572	0.930451
	0.739583	0.74535	0.761171
	0.667638	0.776903	0.665328
	0.817778	0.756164	0.728571
	0.716115	0.869796	0.966715
	0.630979	0.722477	0.810526
	0.902813	0.781215	0.633638
	0.839753	0.740789	0.906298
	0.764381	0.626178	0.749723
	0.85782	0.806412	0.694648
	0.784074	0.615611	0.920705
	0.730366	0.842185	0.887512
	0.713704	0.707237	0.762259
	0.660292	0.683429	0.681511
	0.968605	0.713805	0.767497
	0.738035	0.595536	0.749406
	0.712352	0.68192	0.910683
	0.74026	0.684143	0.903947
	0.691395	0.82808	0.861765
	0.778653	0.818674	0.741837
	0.664921	0.625	0.723502
	0.68268	0.684597	0.769939
	0.596211	0.747519	0.99386
	0.785937	0.723364	0.744612
	0.740426	0.597814	0.763571
	0.715421	0.738693	0.836848
	0.86169	0.820084	0.856534
	0.703448	0.810662	0.838611
	0.775372	0.651584	0.837812
	0.68093	0.796104	0.943503
	0.69648	0.792857	0.870298
	0.796296	0.829448	0.628391
	0.626576	0.683544	0.737148
	0.771845	0.770355	0.63
	0.780576	0.745324	0.852151
	0.636714	0.642151	0.777108
	0.644419	0.756152	0.907563
	0.805471	0.649284	0.853067
	0.905637	0.631765	1.06037
	0.702925	0.778533	0.675362
	0.996672	0.669573	0.739919
	0.705128	0.652229	0.763417
	0.670959	0.661555	1.03708
	0.713483	0.726306	0.622014
	0.688047	0.705049	0.748042
	0.769784	0.735263	0.785632
	0.718663	0.811881	0.832817
	0.85	0.698361	0.708235
	0.758808	0.676157	0.911475
	0.677643	0.640819	0.676942
	0.72282	0.803719	0.78628
	0.671336	0.711563	0.871688
	0.784615	0.767086	1.00533
	1.11005	0.618067	0.9
	0.637088	0.853047	0.637302
	0.720829	0.618286	0.621469
	0.627262	0.84715	0.822993
	0.854582	0.755988	0.693785
	0.69616	0.659531	0.771208
	0.664137	1.0665	0.847668
	0.636364	0.812587	0.814272
	0.661134	0.650485	0.64574
	0.694444	0.597798	0.737042
	0.630495	0.726648	0.697248
	0.823454	0.739972	0.756711
	0.699052	0.756176	0.726389
	0.667532	0.729763	0.85452
	0.639792	0.872363	0.817422
	0.772472	0.8041	0.766284
	0.789424	0.722746	0.740783
	0.958124	0.722429	0.77728
	0.734121	0.632791	0.794872
	0.912709	0.64981	0.781646
	0.84121	0.779252	0.980144
	0.660735	0.76051	0.705128
	0.656371	0.654589	0.846761
	0.850772	0.709544	0.757463
	1.12156	0.774302	0.872283
	0.792887	0.785714	0.818069
	0.741611	0.75718	0.78655
	0.779888	0.72823	0.69251
	0.622449	0.772169	0.733558
	0.730337	0.672395	0.887156
	0.691721	0.734742	0.747706
	1.04889	0.764254	0.782235
	0.692403	0.646684	0.917397
	0.686578	0.72134	0.726474
	0.686251	0.765265	0.669978
	0.785714	0.907	0.767574
	0.745455	0.666667	0.733333
	0.781441	0.633333	0.76988
	0.706977	0.793309	0.822309
	0.686495	0.638365	0.774194
	0.67853	0.623545	0.72697
	0.780908	0.755682	0.766091
	0.863139	0.852846	0.624887
	0.683333	0.816121	0.813158
	0.757353	0.642161	0.768916
	0.684913	0.7986	0.655484
	0.831942	0.732817	0.6
	0.722925	0.711133	0.700114
	0.702427	1	1.02599
	1.00859	0.856105	0.839031
	0.604326	0.668323	0.697157
	0.866878	0.870732	1.02364
	0.700237	0.7423	0.621134
	0.725207	0.788253	0.809129
	0.813861	0.785542	0.636691
	0.775615	0.815873	0.807201
	0.76555	0.884139	1.10495
	0.710145	0.902047	0.732416
	0.712972	0.787602	0.781734
	0.707291	0.714145	0.812232
	0.678887	0.728218	0.873112
	0.712121	0.764569	0.858418
	0.78185	1.06415	0.72651
	0.73102	0.798689	0.810707
	0.727027	0.582803	0.73456
	0.669095	0.718377	0.865979
	0.860313	0.657831	0.806137
	0.830702	0.697974	0.780952
	0.635083	0.797558	0.683054
	0.739057	0.696203	0.835588
	0.647368	0.745127	0.824957
	0.662841	0.752226	0.81286
	0.670245	0.729225	0.804035
	0.721519	0.76931	0.688034
	0.669118	0.74813	0.828221
	0.756602	0.667546	0.844156
	0.889201	0.669327	0.859016
	0.682642	0.669636	0.844884
	0.791574	0.764861	0.829348
	0.714156	0.805825	0.689824
	0.760241	0.748982	1.03753
	0.677677	0.717697	0.724944
	0.710419	0.862259	0.727731
	0.695355	0.859137	0.82825
	0.695058	0.689011	0.641961
	0.67625	0.708549	0.98324
	0.879473	0.775051	0.803092
	0.705021	0.740644	0.817105
	0.710731	0.635008	0.977528
	0.708447	0.768222	0.924918
	0.681212	0.68446	0.634146
	0.8	0.804452	0.875622
	0.714481	0.692202	0.668973
	0.674923	0.706967	0.813986
	0.719235	0.719836	0.797241
	0.672222	0.630522	0.745351
	0.748851	0.823669	0.822281
	0.720617	0.773077	0.942186
	0.852071	0.703557	0.739316
	0.692762	0.69078	1.34743
	0.775342	0.851319	0.854167
	0.740975	0.748566	0.811398
	0.673051	0.746253	0.779835
	0.652065	0.705405	0.615464
	0.857546	0.661605	0.80212
	0.667883	0.849845	0.892704
	0.617332	0.711196	0.926254
	0.672852	0.734177	1.00129
	0.742301	0.683091	0.833333
	0.753724	0.738118	0.858453
	0.777377	0.682058	0.889796
	0.632394	0.666195	1.19719
	0.776552	0.768905	0.784748
	0.722222	0.701316	0.850998
	0.746818	0.618182	0.734923
	0.691344	0.752155	0.860043
	0.882443	0.815889	0.748628
	0.834906	0.719685	0.841017
	0.725615	0.621655	0.854985
	0.740406	0.834884	0.8474
	0.985507	0.638398	0.814455
	0.86606	0.80301	0.713506
	0.753579	0.737276	0.753998
	0.767077	0.922173	0.844051
	0.944518	0.734104	0.84629
	0.741425	0.814024	0.834262
	0.725738	0.683554	0.79015
	0.739454	0.855932	0.750212
	0.633615	0.823413	0.785714
	0.810268	0.783784	0.791027
	0.755556	0.727371	0.873802
	0.697318	0.656555	0.778937
	0.862857	0.677249	0.683274
	0.790859	0.71097	1.38529
	0.879733	0.762821	0.806524
	0.791455	0.721966	0.802266
	0.632972	0.681075	0.779783
	0.807692	0.926521	0.848437
	0.772137	0.843792	0.861201
	0.679012	0.73374	0.710366
	0.778905	0.812564	0.819491
	0.642066	0.712258	0.746988
	0.73713	0.777676	0.76412
	0.772606	0.570803	0.779683
	0.641638	0.703466	0.909747
	0.602941	0.734104	0.758989
	0.635825	0.619621	0.944223
	0.780207	0.921807	0.701923
	0.60452	0.628205	0.695179
	0.678304	0.812062	0.680894
	0.555673	0.717631	0.81
	0.70788	0.659624	0.95122
	0.75814	0.773356	0.837798
	0.682617	0.660645	0.819975
	0.656516	0.672434	0.885151
	0.675978	0.747331	0.720661
	0.822506	0.76036	0.713338
	0.68623	0.648103	0.817757
	0.667506	0.732329	0.865688
	0.800461	0.638381	0.688266
	0.990716	1.05	0.793262
	0.71835	0.788013	0.907895
	0.744493	0.714971	0.719653
	0.637827	0.6658	0.74409
	0.871795	0.879332	0.703664
	0.735537	0.74359	0.652141
	0.689655	0.668229	0.853755
	0.821248	0.713899	0.658824
	0.984071	0.89538	0.720548
	0.708754	0.757538	0.739193
	0.869565	0.718326	0.849112
	0.725933	0.811146	0.758099
	0.629863	0.827133	0.910299
	0.656962	0.830369	0.743338
	0.763968	0.752178	0.745473
	0.670051	0.709434	0.863946
	0.807692	1.12898	0.750939
	0.725111	0.680057	0.882474
	0.644703	0.733742	0.83
	0.678117	0.726485	0.72549
	0.786344	0.738061	0.779874
	0.620874	0.766389	0.748936
	0.743802	0.775268	0.764431
	0.799514	0.848819	0.812189

## Sheet: Figure5I_Nup54_NoRan_NoKap
Name	Nup54_t0	Nup54_t60_noRan	Nup54_t90_noKaps
Median	0.731956	0.746526	0.746065
First Quartile	0.685632	0.700097	0.696812
Third Quartile	0.788092	0.797673	0.80202
Data:	0.680827	0.622931	0.828409
	0.64409	0.768041	0.759863
	0.68254	0.608852	0.962845
	0.660976	0.612009	0.770156
	0.694529	0.901639	0.571429
	0.704692	0.755618	0.768041
	0.697465	0.64375	1.01226
	0.911	0.797704	0.73138
	0.751908	0.828964	0.753687
	0.93771	0.715103	0.733696
	0.669524	0.811398	0.746388
	0.67263	0.795312	0.76051
	0.741023	0.733422	0.693824
	0.776575	0.763189	0.767742
	0.633609	0.777635	0.751773
	0.729694	0.681275	0.847539
	0.724586	0.674805	0.72043
	0.690307	0.776271	0.675805
	0.768928	0.730323	0.752727
	0.609929	0.579141	0.636446
	0.862112	0.707633	0.656434
	0.800708	0.603306	0.795314
	0.90166	0.741935	0.642684
	0.655114	0.833693	0.752591
	0.674174	0.757932	0.770968
	0.788146	0.730606	0.613462
	0.755788	0.748591	0.778378
	0.792079	0.742729	0.804348
	0.69007	0.703467	0.716312
	0.826087	0.797578	0.708092
	0.705379	0.770302	0.774669
	0.67511	0.75233	0.898693
	0.688282	0.848598	0.600928
	0.705882	0.727876	0.767209
	0.793388	0.715476	0.688213
	0.71547	0.784934	0.753943
	0.746746	0.708653	0.679204
	0.662304	0.668054	0.536984
	1.23003	0.725773	0.64207
	0.601415	0.733781	0.698145
	0.764858	0.744066	0.739726
	0.655063	0.719844	0.895565
	0.693548	0.755587	0.688859
	0.926027	0.838017	0.630882
	0.735849	0.8398	0.856
	0.78793	0.728155	0.552214
	0.800995	0.804027	0.740337
	0.745879	0.783019	0.782799
	0.624494	0.933575	0.779609
	0.801325	0.712798	0.799443
	0.781079	0.93447	0.75468
	0.621835	0.661983	0.600743
	0.751295	0.712286	0.7625
	0.679222	0.767045	0.770153
	0.730693	0.727742	0.736239
	0.639161	0.672324	0.549598
	0.787834	0.740458	0.619396
	0.717498	0.756168	0.709195
	0.685437	0.811842	0.766298
	0.66879	0.634459	0.80799
	0.727977	0.823171	0.715493
	0.731385	0.821128	0.845974
	0.632497	0.77193	0.738423
	0.76105	0.669821	0.738516
	0.71511	0.832808	0.69727
	0.762065	0.822917	0.566301
	0.818421	0.723529	0.696008
	0.657485	0.696177	0.80849
	0.779862	0.713429	0.625971
	0.702041	0.719101	0.722298
	0.708381	0.745953	0.716595
	0.875318	0.87907	1.18212
	0.792049	0.637838	0.744505
	0.645361	0.902628	0.991632
	0.806678	0.861804	0.753036
	0.668867	0.640127	0.7303
	0.854962	0.705667	0.782276
	0.783455	0.699468	0.716923
	0.781984	0.5941	0.69697
	0.840132	0.792978	0.796685
	0.738646	0.731649	0.736364
	0.904494	0.936992	0.836683
	0.657064	0.744371	0.614319
	0.590814	0.78712	0.768222
	1.09066	0.692557	0.905225
	0.748596	0.76259	0.745562
	0.853147	0.688769	0.861111
	0.598053	0.754408	0.688389
	0.742342	0.659114	0.724181
	0.753623	0.848437	0.702128
	0.866142	0.796178	0.725864
	0.697619	0.847552	0.624494
	0.664345	0.782178	1.16626
	0.942463	0.877193	0.689759
	0.70073	0.712074	0.831269
	0.816624	0.67218	0.706813
	0.72271	0.656518	0.593287
	0.728485	0.766929	0.72043
	0.671488	0.734194	0.682975
	0.635762	0.758308	0.932524
	0.779703	0.645092	0.823442
	0.666304	0.825592	0.738487
	0.876528	0.805907	0.798901
	0.736232	0.740969	0.601759
	0.735616	0.784079	0.747449
	0.709585	0.73903	0.710322
	0.803461	0.68254	0.830732
	0.649937	0.724559	0.879684
	0.741085	0.680412	0.689605
	0.766736	0.861573	0.64839
	0.732527	0.766667	0.698728
	0.803636	0.613881	0.720264
	0.727177	0.840772	0.758653
	1.08609	0.680238	0.679755
	0.755651	0.719373	0.85172
	0.658754	0.699085	0.723949
	0.770582	0.71021	0.70575
	0.684942	0.755495	0.702069
	0.704307	0.636566	0.747696
	0.7133	1.00107	0.804348
	0.62842	0.760331	0.842667
	0.725264	0.718291	0.539157
	0.872979	0.707941	0.726231
	0.625698	0.861053	0.714286
	0.694241	0.792277	0.831536
	0.722772	0.632497	0.987013
	0.68279	0.757827	0.820996
	0.902669	0.697135	0.570833
	0.783505	0.73741	0.650051
	0.772885	0.70068	0.795485
	0.655623	0.754642	0.609099
	0.758483	0.751743	0.671518
	0.719735	0.7471	0.636103
	0.671659	0.756058	0.705941
	0.787724	0.883051	0.656827
	0.712329	0.795455	0.779234
	0.924426	0.801527	0.765957
	0.763308	0.751166	0.842351
	0.624826	0.717568	0.689362
	0.782222	0.710875	0.847758
	0.907173	0.724304	1.013
	0.881988	0.724551	0.836197
	0.713161	0.749164	0.676368
	0.7082	0.641602	0.797516
	0.736406	0.742471	0.845855
	0.89899	0.687055	0.745742
	0.686681	0.784595	0.77882
	1.11277	0.837545	0.847904
	0.671315	0.80624	0.742532
	0.833148	0.667586	0.737838
	0.679726	0.663366	0.657335
	0.743553	0.729117	0.800475
	0.822835	0.885486	0.68821
	0.682692	0.687161	0.726014
	0.735765	0.812097	0.652587
	0.763661	0.878299	0.781598
	0.707727	0.656287	0.793135
	0.7369	0.926761	0.744711
	0.800776	0.762857	0.773723
	0.881706	0.682705	0.785149
	0.76096	0.667337	0.684768
	0.71813	0.90445	0.742621
	0.722281	0.854452	0.942801
	0.836269	0.852048	0.757962
	0.664995	0.795349	0.703125
	0.637864	0.636968	0.807757
	0.856968	0.757908	0.777381
	0.711168	0.661209	0.579329
	0.832727	0.755587	0.716115
	0.719227	0.7656	0.642012
	0.597015	0.656215	0.723214
	0.696629	0.651568	0.782178
	0.84375	0.773585	0.787445
	0.931925	0.693333	0.742972
	0.795894	0.876364	0.838052
	0.612969	0.776078	0.655991
	0.816525	0.699758	0.695921
	0.658501	0.656371	0.728223
	0.813793	0.866048	0.801406
	0.678089	0.854191	0.877147
	0.618852	0.700389	0.581081
	0.71223	0.939163	0.748084
	0.618421	0.749436	1.20192
	0.712583	0.886323	0.568966
	0.69488	0.795393	0.871158
	0.747783	0.776316	0.814925
	0.694965	0.745708	0.720621
	0.781163	0.643227	0.706865
	0.661051	0.648446	0.668122
	0.596674	0.789279	0.772414
	0.727062	0.773463	0.707589
	0.726764	0.658885	0.686646
	0.767221	0.725564	0.847283
	0.970082	0.668667	0.857771
	0.67827	0.921117	0.841099
	0.587761	0.693182	0.715909
	0.714885	0.834502	0.873598
	0.755896	0.740295	0.937542
	0.620957	0.796631	1.09476
	0.713161	0.751111	0.765707
	0.713578	0.598726	0.744898
	0.720506	0.802198	0.781997
	0.711507	0.574857	0.781671
	0.640853	0.737725	0.747978
	0.875451	0.665591	0.762264
	0.786482	0.815336	0.824658
	0.733858	0.698276	0.682119
	0.735127	0.804185	0.730964
	0.859002	0.705238	0.741738
	0.647362	0.701702	0.628151
	0.709544	0.968188	0.817647
	0.780073	0.950504	0.815562
	0.82139	0.802548	0.651669
	0.719512	0.767974	0.772504
	0.781681	0.731444	0.772812
	0.676633	0.716141	0.7
	0.79132	0.845679	0.704808
	0.742394	0.786223	0.74059
	0.778436	0.703057	1.01336
	0.774026	0.688098	0.705556
	0.667683	0.727163	0.854369
	0.792453	0.637427	0.833017
	0.756194	0.76507	0.764583
	0.714159	0.728614	0.75
	0.754973	0.674491	0.609705
	0.859909	0.695876	0.754098
	0.601759	0.727273	0.952854
	0.660271	0.696398	0.70077
	0.801378	0.731241	0.713443
	0.745247	0.773743	0.60397
	0.760705	0.83213	0.679144
	0.83871	0.832853	0.66108
	0.926526	0.759091	0.735808
	0.781553	0.876645	0.941247
	0.761283	0.665335	0.709677
	0.828933	0.963866	0.74144
	0.761364	0.7584	0.815988
	0.722455	0.998852	0.599246
	0.651249	0.773205	0.710914
	0.827233	0.784267	0.690608
	0.712375	0.865096	0.748232
	0.69863	0.777416	0.821641
	0.626651	0.772992	0.802225
	0.729508	0.816923	0.679837
	1.0955	0.841328	0.690125
	0.686375	0.790909	0.743847
	0.699885	0.733258	0.85554
	0.739079	0.690377	0.705171
	0.649828	0.825983	0.704745
	0.597015	0.898426	0.769852
	0.810778	0.757642	0.762032
	0.746973	0.815484	0.796593
	0.682327	0.680874	0.633333
	0.867542	0.739454	0.729258
	0.762332	0.714487	0.762162
	0.783666	0.793275	0.814327
	0.849162	0.88203	0.727173
	0.656506	0.819767	0.82283
	1.14332	0.834734	0.608556
	0.690226	0.710911	0.722609
	0.760139	0.743396	0.81015
	0.735802	0.740319	0.759322
	0.787016	0.681538	0.777011
	0.844888	0.749487	0.696759
	0.767367	0.719834	0.797768
	0.770393	0.810617	0.754501
	0.682814	0.709677	0.800268
	0.719116	0.611834	0.806563
	0.708391	0.783784	0.664141
	0.813449	0.703784	0.679558
	1.1546	0.76431	0.921875
	0.754569	0.812121	0.880488
	0.567504	0.705577	0.704741
	0.781076	0.739631	0.695122
	0.713881	0.803073	0.83871
	0.774411	0.7	0.829105
	0.691385	0.770294	0.618816
	0.626335	0.667494	0.640385
	1.04138	0.780142	0.72433
	0.686217	0.778571	0.662219
	0.72579	0.856383	0.788401
	0.670188	0.662687	0.700834
	0.672167	0.797521	0.69112
	0.669872	0.646492	0.748031
	0.984505	0.716549	0.795048
	0.686957	0.796221	0.758119
	0.799759	0.703642	0.690745
	0.852781	0.709766	0.705036
	0.706531	0.631503	0.647738
	0.824164	0.703774	0.842818
	0.699239	0.81686	0.753641
	0.709849	0.743948	0.85667
	0.656313	1.24345	0.853061
	0.923852	0.661404	0.770059
	0.745192	0.743652	0.835781
	0.721795	0.672414	0.829885
	0.702013	0.650503	0.803977
	0.826045	0.634667	0.763636
	0.733711	0.954109	0.813364
	0.690816	0.751814	0.843486
