# Supplementary material for: Conformation of the nuclear pore in living cells is modulated by transport state
Source: eLife. 2020 Dec 21;9:e60654. doi: 10.7554/eLife.60654 (PMC7752133; doi:10.7554/eLife.60654)
Supplement: Figure 6—source data 1. [file elife-60654-fig6-data1.xlsx]

## Sheet: Figure6
	Fed Cells	Starved Cells
Median	-0.0567436	0.0107629
First Quartile	-0.0992184	-0.063106
Third Quartile	-0.00322963	0.0947232
Cell 1	-0.11973	-0.0117994
	-0.0311111	-0.00170358
	-0.200811	0.0880682
	-0.0985915	0.05
	-0.232653	0.193931
	-0.168016	-0.0717557
	-0.0654545	0.0491493
	-0.110307	-0.0185185
	0.019305	0.165837
	-0.0909091	0.103683
Cell 2	-0.0784593	0.125512
	-0.0182119	-0.0461538
	-0.0783939	0.15493
	0.0286624	-0.0748031
	-0.118243	0.114973
	-0.0570962	0.0494905
	0.108766	-0.0789474
	-0.0185185	-0.148454
	-0.1417	-0.0301003
	-0.0807018	-0.215603
Cell 3	-0.124088	0.0944993
	0.0410023	0.272388
	-0.0251142	0.0629471
	-0.0580645	-0.0588235
	-0.07277	0.196721
	0.00815217	0.130909
	-0.276215	0.21958
	-0.0741627	-0.0553797
	-0.0758427	0.318966
	-0.330769	0.153656
Cell 4	0.0541455	0.120588
	-0.00170358	0.0953947
	0.0485437	0.0584518
	0	-0.0358306
	-0.182609	-0.0478261
	-0.0326679	-0.0633484
	-0.0307692	0.114865
	-0.0546875	0.0202952
	-0.0363322	0.289193
	-0.101099	-0.0304762
Cell 5	0.0246533	-0.00301205
	-0.0419847	-0.196291
	0.0261044	0.0395095
	-0.0656371	0.0095498
	0.0169753	0.294372
	-0.00880282	0.128
	0.0485612	0.043131
	-0.197464	-0.0608424
	-0.113131	0.225753
	-0.103383	-0.0968379
Cell 6	-0.152047	-0.0940054
	-0.173258	-0.125796
	0.0706922	-0.140351
	-0.11326	0.0744681
	0.0507132	0.00544465
	-0.00132626	0.0633117
	-0.127434	0.0801394
	0.0375427	0.0163043
	-0.0507614	0.126645
	-0.00373832	-0.078869
Cell 7	-0.0649652	0.0684292
	-0.0124378	-0.0943114
	-0.045677	-0.074364
	0.015625	-0.132787
	-0.0258621	-0.0713128
	0.00545455	-0.151832
	-0.0334821	-0.0869565
	-0.056391	-0.10303
	-0.0313808	0.0776256
	-0.192641	0.0878505
Cell 8	-0.203608	-0.104334
	-0.0978836	0.137097
	-0.0891304	-0.171975
	-0.145773	0.0089153
	-0.015625	-0.0331412
	-0.075388	-0.152488
	-0.0897756	0.166176
	0.0652819	-0.205689
	-0.0899471	-0.00770713
	-0.126344	-0.0216606
Cell 9	0.0176322	-0.0439414
	-0.0867052	0.011976
	-0.0826667	-0.0682853
	0.0542857	0.0303448
	-0.0286458	0.0225118
	0.00872093	0.112619
	-0.189441	0.0773362
	-0.351254	-0.020436
	-0.0275229	-0.0340599
	-0.0449735	0.0328638
Cell 10	0.052	0.20178
	-0.0290135	-0.0599739
	-0.0110865	0.0271003
	-0.0979955	-0.0610932
	-0.0662252	0.0416171
	-0.0509666	-0.0528169
	-0.0883392	-0.0630252
	-0.0794473	-0.120357
	-0.0650264	0.0635659
	0.0237226	0.223112
